# Supplementary material for: Multi-Omics Analyses Reveal the Regulatory Network and the Function of ZmUGTs in Maize Defense Response
Source: Front Plant Sci. 2021 Sep 24;12:738261. doi: 10.3389/fpls.2021.738261 (PMC8497902; doi:10.3389/fpls.2021.738261)
Supplement: Supplementary file 2 [file Table_1.XLSX]

## Sheet: Sheet1
Supplementary Table S1 Reads mapped to the maize B73_v4 genome
Sample	All reads	Uniquely mapping rate (%)	Multiple mapping rate (%)	Overall mapping rate (%）
B73 × H95WT-22℃_rep1	21467131	86.72	5.2	91.92
B73 × H95WT-22℃_rep2	26464552	86.51	5.09	91.6
B73 × H95mt-22℃_rep1	22666713	86.16	4.85	91.01
B73 × H95mt-22℃_rep2	31936561	86.03	4.78	90.81
B73 × H95WT-48hpts_rep1	32259407	88.63	4.29	92.92
B73 × H95WT-48hpts_rep2	22586028	85.87	5.31	91.18
B73 × H95mt-48hpts_rep1	34825046	87.39	4.65	92.04
B73 × H95mt-48hpts_rep2	26517397	85.74	5.44	91.18
B73 × H95WT-6hpts_rep1	32344095	87.49	4.59	92.08
B73 × H95WT-6hpts_rep2	30506075	85.67	5.76	91.43
B73 × H95mt-6hpts_rep1	34554880	86.12	5.5	91.62
B73 × H95mt-6hpts_rep2	39316806	84.54	6.4	90.94
Mo17 × H95WT-22℃_rep1	35207632	84.22	5.27	89.49
Mo17 × H95WT-22℃_rep2	32150979	83.36	5.29	88.65
Mo17 × H95mt-22℃_rep1	35202726	84.19	4.26	88.45
Mo17 × H95mt-22℃_rep2	42413282	84.14	5.03	89.17
Mo17 × H95WT_48hpts_rep1	22954982	76.75	10.82	87.57
Mo17 × H95WT-48hpts_rep2	38147120	83.9	5.11	89.01
Mo17 × H95mt-48hpts_rep1	25735638	84.81	4.36	89.17
Mo17 × H95mt-48hpts_rep2	38934908	81.33	6.53	87.86
Mo17 × H95WT-6hpts_rep1	31641042	84.12	5	89.12
Mo17 × H95WT-6hpts_rep2	43177895	83.73	5.28	89.01
Mo17 × H95mt-6hpts_rep1	31486922	83.36	5.25	88.61
Mo17 × H95mt-6hpts_rep2	44056362	84.15	5.29	89.44
Average	3.23564e+07	84.7887	5.38958	90.1783
Note: Rep1: biological replicates data was obtained by single end; Rep2: biological replicates data was obtained by paired-end reads.
