# Supplementary material for: Multi-Omics Analyses Reveal the Regulatory Network and the Function of ZmUGTs in Maize Defense Response
Source: Front Plant Sci. 2021 Sep 24;12:738261. doi: 10.3389/fpls.2021.738261 (PMC8497902; doi:10.3389/fpls.2021.738261)
Supplement: Supplementary file 3 [file Table_2.XLSX]

## Sheet: B73 × H95-6hpts
Supplementary Table S2 List for DEGs in Rp1-D21 mutant compared with wild type from B73×H95 and Mo17×H95 backgrounds for indicated times post temperature shift and at constant 22 ℃ that induces the HR.
v4 Gene ID	log2FC	PValue	FDR
Zm00001d023320	-4.7559	6.78863e-20	1.81962e-15
Zm00001d051251	-3.64042	1.13137e-08	0.000151627
Zm00001d052518	3.71258	2.96499e-08	0.000264912
Zm00001d040029	4.00945	4.10876e-07	0.00275328
Zm00001d001960	2.89717	5.7464e-07	0.00308053
Zm00001d023317	-3.97423	7.11865e-07	0.00318014
Zm00001d014914	4.04034	7.84734e-06	0.0300486

## Sheet: Mo17 × H95-6hpts
v4 Gene ID	log2FC	PValue	FDR
Zm00001d023320	-8.43036	7.00509e-23	1.90833e-18
Zm00001d017935	-6.22589	1.81297e-09	2.46944e-05
Zm00001d016676	-5.33318	1.03902e-06	0.00566098
Zm00001d031159	-7.03781	4.28636e-06	0.015673
Zm00001d023311	1.9577	4.60259e-06	0.015673
Zm00001d023320	-2.15617	9.26704e-06	0.0280503
Zm00001d012032	-7.28433	1.16796e-05	0.0493462

## Sheet: B73 × H95-48hpts
v4 Gene ID	log2FC	PValue	FDR
Zm00001d031158	5.29664	5.6e-22	1.49e-17
Zm00001d029648	5.88757	2.33e-20	3.1e-16
Zm00001d024960	5.92283	4.6e-19	4.09e-15
Zm00001d021647	4.67237	9.87e-18	6.57e-14
Zm00001d022457	4.95079	2.04e-17	1.09e-13
Zm00001d024207	10.694	2.55e-17	1.13e-13
Zm00001d045843	6.19183	7.75e-17	2.95e-13
Zm00001d048950	5.15224	1.02e-16	3.39e-13
Zm00001d004738	7.02163	2.24e-16	6.63e-13
Zm00001d018064	11.5142	1.64e-15	4.36e-12
Zm00001d014001	7.23279	4.02e-15	9.72e-12
Zm00001d048949	5.21557	7.07e-15	1.57e-11
Zm00001d027946	6.44401	1.52e-14	3.12e-11
Zm00001d043988	4.07906	3.22e-14	6.12e-11
Zm00001d042749	5.4505	6.5e-14	1.08e-10
Zm00001d042633	6.4349	7.73e-14	1.21e-10
Zm00001d048644	4.57136	9.26e-14	1.37e-10
Zm00001d031221	4.24142	1.64e-13	2.3e-10
Zm00001d000298	4.61469	1.75e-13	2.32e-10
Zm00001d035162	3.38113	2.55e-13	3.24e-10
Zm00001d007363	6.99445	5.05e-13	6.11e-10
Zm00001d042099	4.90558	6.04e-13	6.93e-10
Zm00001d047845	6.95088	6.43e-13	6.93e-10
Zm00001d043665	4.28467	6.51e-13	6.93e-10
Zm00001d046342	3.58094	7.32e-13	7.49e-10
Zm00001d018738	6.07228	8.14e-13	8.02e-10
Zm00001d047192	5.91566	1.16e-12	1.1e-09
Zm00001d042143	5.34296	1.46e-12	1.34e-09
Zm00001d006535	3.79032	1.05e-11	9.36e-09
Zm00001d031157	9.29477	1.17e-11	1.01e-08
Zm00001d012024	6.17945	2.03e-11	1.69e-08
Zm00001d017425	3.72176	2.42e-11	1.95e-08
Zm00001d047436	3.48177	5.65e-11	4.43e-08
Zm00001d032858	7.13545	8.03e-11	6.11e-08
Zm00001d013629	5.48302	9.67e-11	7.15e-08
Zm00001d041768	6.03528	1.02e-10	7.32e-08
Zm00001d011886	4.39909	1.57e-10	1.1e-07
Zm00001d034095	5.37399	1.99e-10	1.3e-07
Zm00001d019758	5.25208	1.92e-10	1.3e-07
Zm00001d049028	3.5195	2e-10	1.3e-07
Zm00001d044308	5.96491	2.58e-10	1.63e-07
Zm00001d009939	4.5375	3.38e-10	2.09e-07
Zm00001d017969	5.54305	3.76e-10	2.27e-07
Zm00001d050805	6.70718	4.62e-10	2.73e-07
Zm00001d028165	6.95698	6.49e-10	3.75e-07
Zm00001d043947	5.77681	7.06e-10	4e-07
Zm00001d033455	2.85547	7.49e-10	4.13e-07
Zm00001d040326	3.87801	7.6e-10	4.13e-07
Zm00001d045210	3.99997	9.36e-10	4.98e-07
Zm00001d026255	5.91477	1.03e-09	5.36e-07
Zm00001d037749	4.9751	1.21e-09	6.18e-07
Zm00001d023320	-3.44805	1.92e-09	9.64e-07
Zm00001d049242	2.85635	2.04e-09	1.01e-06
Zm00001d010284	5.69358	2.33e-09	1.13e-06
Zm00001d031189	4.75024	3.1e-09	1.46e-06
Zm00001d029744	3.24034	3.16e-09	1.46e-06
Zm00001d014945	4.86359	3.18e-09	1.46e-06
Zm00001d023843	3.73128	3.42e-09	1.54e-06
Zm00001d040285	4.08957	4.95e-09	2.2e-06
Zm00001d041082	3.71849	5.23e-09	2.25e-06
Zm00001d028816	3.31477	5.2e-09	2.25e-06
Zm00001d034514	2.99453	5.8e-09	2.42e-06
Zm00001d036927	5.44095	5.82e-09	2.42e-06
Zm00001d043622	8.59136	6.21e-09	2.54e-06
Zm00001d014121	4.82752	6.85e-09	2.76e-06
Zm00001d020628	3.20632	7.48e-09	2.97e-06
Zm00001d006536	3.7136	8.38e-09	3.28e-06
Zm00001d005766	3.34514	1.21e-08	4.67e-06
Zm00001d027908	5.7893	1.63e-08	6.21e-06
Zm00001d032240	4.73865	1.98e-08	7.43e-06
Zm00001d052989	3.89825	2.01e-08	7.43e-06
Zm00001d032691	4.16951	2.54e-08	9.28e-06
Zm00001d027948	6.11447	2.8e-08	1.01e-05
Zm00001d012281	6.04133	3.12e-08	1.11e-05
Zm00001d001943	4.61297	3.53e-08	1.24e-05
Zm00001d009945	6.30398	3.66e-08	1.26e-05
Zm00001d046746	2.4768	3.93e-08	1.34e-05
Zm00001d039963	3.74671	4.2e-08	1.42e-05
Zm00001d008449	2.92344	4.62e-08	1.54e-05
Zm00001d035246	2.8699	5.7e-08	1.87e-05
Zm00001d040705	4.33512	6.15e-08	2e-05
Zm00001d021688	4.04281	7.58e-08	2.43e-05
Zm00001d007379	3.07921	8e-08	2.52e-05
Zm00001d042553	3.19962	8.05e-08	2.52e-05
Zm00001d045884	4.02155	8.54e-08	2.61e-05
Zm00001d037968	4.43599	8.44e-08	2.61e-05
Zm00001d024996	3.71756	9.52e-08	2.88e-05
Zm00001d021882	2.53054	9.79e-08	2.93e-05
Zm00001d031155	6.1414	9.97e-08	2.95e-05
Zm00001d044181	4.49001	1.13e-07	3.3e-05
Zm00001d048499	2.60665	1.23e-07	3.55e-05
Zm00001d003048	3.10302	1.37e-07	3.92e-05
Zm00001d024665	8.12934	1.48e-07	4.2e-05
Zm00001d016401	2.89444	2.01e-07	5.64e-05
Zm00001d021638	4.26041	2.54e-07	7.04e-05
Zm00001d042140	3.96163	3.18e-07	8.74e-05
Zm00001d015867	8.04662	3.28e-07	8.91e-05
Zm00001d014649	4.27605	3.37e-07	9.06e-05
Zm00001d013115	3.53683	3.47e-07	9.25e-05
Zm00001d030555	4.70273	3.75e-07	9.89e-05
Zm00001d002434	3.72595	3.85e-07	0.000100492
Zm00001d052189	5.35853	4.13e-07	0.000106691
Zm00001d003355	3.57956	4.36e-07	0.000111492
Zm00001d036256	6.25011	5.19e-07	0.000131576
Zm00001d014804	2.87753	5.24e-07	0.000131713
Zm00001d036370	3.30115	5.31e-07	0.000132005
Zm00001d018734	3.87585	5.39e-07	0.000132799
Zm00001d030548	3.96223	5.78e-07	0.00014122
Zm00001d033517	4.18706	6.1e-07	0.00014773
Zm00001d042244	3.91396	7.1e-07	0.000170243
Zm00001d050259	3.32752	7.35e-07	0.000174752
Zm00001d021176	4.9866	8.18e-07	0.000192647
Zm00001d018727	3.62651	8.46e-07	0.000197475
Zm00001d003365	3.75648	9.66e-07	0.000223662
Zm00001d003356	2.83192	1.09e-06	0.000250685
Zm00001d009328	3.27069	1.15e-06	0.000261068
Zm00001d003209	2.83681	1.59e-06	0.000358092
Zm00001d045211	5.08807	1.63e-06	0.000365661
Zm00001d017014	3.35976	1.72e-06	0.000382401
Zm00001d015616	3.57405	1.86e-06	0.000408887
Zm00001d031257	3.59863	2.06e-06	0.000449282
Zm00001d043121	4.22193	2.08e-06	0.000450052
Zm00001d025065	3.58666	2.2e-06	0.000472245
Zm00001d036550	2.4302	2.27e-06	0.000483595
Zm00001d033624	2.22177	2.43e-06	0.000512897
Zm00001d037281	5.00164	2.58e-06	0.000540079
Zm00001d045360	4.15451	2.6e-06	0.000540079
Zm00001d006531	7.52206	3.04e-06	0.000627661
Zm00001d046318	4.25126	3.32e-06	0.000680116
Zm00001d035553	4.75317	3.98e-06	0.000802256
Zm00001d003903	4.80083	4.22e-06	0.000845617
Zm00001d053554	2.2875	4.33e-06	0.000859764
Zm00001d006538	4.54967	4.62e-06	0.000911077
Zm00001d048020	4.67577	4.85e-06	0.000949123
Zm00001d035166	2.0401	4.98e-06	0.000967341
Zm00001d051810	5.0727	5.05e-06	0.000974488
Zm00001d048913	4.39863	5.36e-06	0.0010273
Zm00001d047952	2.93441	5.47e-06	0.0010402
Zm00001d009112	2.49721	5.55e-06	0.00104796
Zm00001d027423	3.59262	5.83e-06	0.00109218
Zm00001d013617	4.70443	6.35e-06	0.00118315
Zm00001d041838	2.95453	7.33e-06	0.0013545
Zm00001d032618	2.70672	8.1e-06	0.00148681
Zm00001d046801	2.20095	8.26e-06	0.00150641
Zm00001d044833	3.66639	8.8e-06	0.001593
Zm00001d012899	2.53533	9.39e-06	0.0016896
Zm00001d038930	4.62274	9.72e-06	0.00173752
Zm00001d034427	3.81735	1.08e-05	0.00191435
Zm00001d045295	2.34193	1.11e-05	0.001964
Zm00001d032368	3.4616	1.17e-05	0.00204396
Zm00001d003358	3.09876	1.18e-05	0.00204702
Zm00001d042056	3.26323	1.18e-05	0.00204702
Zm00001d031407	3.07814	1.25e-05	0.00215177
Zm00001d019078	3.00776	1.29e-05	0.00219078
Zm00001d017019	2.47799	1.29e-05	0.00219078
Zm00001d032643	5.13271	1.38e-05	0.0023166
Zm00001d028467	3.44627	1.38e-05	0.0023166
Zm00001d030981	2.8057	1.46e-05	0.00240723
Zm00001d050302	3.2482	1.57e-05	0.0025729
Zm00001d015091	2.40531	1.63e-05	0.00266614
Zm00001d020780	1.94087	1.64e-05	0.00266614
Zm00001d042948	2.27673	1.79e-05	0.00289185
Zm00001d031351	2.07565	1.83e-05	0.00293704
Zm00001d043994	4.12364	2e-05	0.00317469
Zm00001d005823	2.40857	2e-05	0.00317469
Zm00001d008548	4.40297	2.15e-05	0.00339125
Zm00001d035542	2.02518	2.3e-05	0.00357479
Zm00001d017912	2.39404	2.32e-05	0.00359237
Zm00001d026426	2.48572	2.49e-05	0.00382947
Zm00001d021655	2.8213	2.66e-05	0.00406809
Zm00001d016121	3.39587	2.78e-05	0.00417776
Zm00001d053055	2.81724	2.88e-05	0.00428955
Zm00001d037397	3.00363	3.19e-05	0.00471542
Zm00001d021497	3.38735	3.24e-05	0.00475902
Zm00001d043258	3.76232	3.33e-05	0.00486405
Zm00001d029829	2.87058	3.47e-05	0.00504347
Zm00001d027947	3.96651	3.51e-05	0.00508208
Zm00001d009619	2.81671	3.64e-05	0.00523375
Zm00001d002974	2.29124	3.68e-05	0.00524132
Zm00001d053001	3.37499	3.75e-05	0.00524132
Zm00001d009814	1.95336	3.68e-05	0.00524132
Zm00001d031372	2.16834	3.75e-05	0.00524132
Zm00001d022437	2.6941	3.74e-05	0.00524132
Zm00001d022234	3.60125	3.78e-05	0.00524132
Zm00001d018671	4.00943	3.91e-05	0.00537477
Zm00001d052245	3.64917	3.92e-05	0.00537477
Zm00001d048357	3.20349	3.96e-05	0.00541121
Zm00001d048329	2.19529	4.03e-05	0.00547559
Zm00001d051693	2.95759	4.27e-05	0.00576961
Zm00001d011438	3.32516	4.65e-05	0.00622157
Zm00001d024752	3.32905	4.71e-05	0.00627609
Zm00001d025799	2.13236	4.86e-05	0.00643979
Zm00001d018700	3.71994	4.89e-05	0.00644257
Zm00001d029708	2.63942	4.95e-05	0.00649217
Zm00001d027900	1.91059	5.13e-05	0.00670084
Zm00001d024843	1.78671	5.38e-05	0.0069382
Zm00001d047104	2.47492	5.51e-05	0.00705796
Zm00001d024961	2.53351	5.6e-05	0.00712993
Zm00001d012900	2.09804	5.65e-05	0.00716187
Zm00001d028167	2.59994	5.86e-05	0.00732506
Zm00001d011643	3.26683	5.84e-05	0.00732506
Zm00001d025401	1.76797	5.94e-05	0.0073877
Zm00001d003353	3.2324	7.55e-05	0.00931084
Zm00001d040786	3.39747	7.88e-05	0.0096291
Zm00001d003861	1.81532	7.94e-05	0.00964722
Zm00001d002707	4.03007	8.08e-05	0.00976146
Zm00001d015798	2.87468	8.1e-05	0.00976146
Zm00001d017121	2.82487	8.18e-05	0.00981056
Zm00001d003190	3.60694	8.48e-05	0.0100751
Zm00001d011625	1.97185	8.67e-05	0.0101743
Zm00001d024852	3.5278	8.6e-05	0.0101743
Zm00001d014060	2.73361	8.76e-05	0.0102247
Zm00001d018627	1.82934	8.98e-05	0.0104363
Zm00001d051166	2.10277	9.5e-05	0.010999
Zm00001d019750	2.29119	9.74e-05	0.0111809
Zm00001d004305	2.66287	9.88e-05	0.011289
Zm00001d038325	1.80372	0.000104595	0.0117997
Zm00001d007803	2.96136	0.000106864	0.0120049
Zm00001d040777	1.87431	0.000113842	0.0126817
Zm00001d020148	2.41352	0.000123778	0.0137311
Zm00001d034417	2.33522	0.000126553	0.0139807
Zm00001d029794	2.98151	0.000136559	0.0149178
Zm00001d050885	3.10373	0.000141337	0.015359
Zm00001d025451	3.22985	0.000145223	0.0157171
Zm00001d020702	2.94076	0.000148792	0.0160382
Zm00001d028093	1.80576	0.000149972	0.0161003
Zm00001d050011	1.67945	0.000152599	0.0161792
Zm00001d002596	2.7822	0.00016632	0.0175024
Zm00001d033241	2.60322	0.000173834	0.018221
Zm00001d010870	2.3264	0.000174836	0.0182543
Zm00001d036097	1.79736	0.000183138	0.0190463
Zm00001d036650	2.81425	0.000186793	0.0193469
Zm00001d047664	2.62171	0.000187481	0.0193469
Zm00001d025012	2.41147	0.000194423	0.0199858
Zm00001d040244	1.94832	0.000199139	0.0203137
Zm00001d023611	2.368	0.000203734	0.0205833
Zm00001d013997	3.31612	0.000225534	0.0224053
Zm00001d038551	2.58669	0.000229431	0.0227077
Zm00001d017008	3.53845	0.000231098	0.0227879
Zm00001d053514	3.32002	0.000234393	0.0229785
Zm00001d009084	1.79445	0.000234757	0.0229785
Zm00001d028465	1.95632	0.000255105	0.0246979
Zm00001d009106	2.48561	0.000275205	0.0264515
Zm00001d039825	2.60642	0.000289119	0.0275896
Zm00001d036261	2.53289	0.000302529	0.0286638
Zm00001d011315	3.13215	0.00032357	0.0304407
Zm00001d053410	2.91659	0.000331468	0.0310739
Zm00001d019457	2.58088	0.000335075	0.0313019
Zm00001d034129	3.02628	0.000341606	0.0318004
Zm00001d032374	2.49466	0.000369873	0.0341619
Zm00001d052990	1.73398	0.000396861	0.0361851
Zm00001d049330	2.57633	0.000439131	0.039365
Zm00001d041608	1.69913	0.000453909	0.0398841
Zm00001d024962	2.32956	0.000483785	0.0423694
Zm00001d042909	1.5983	0.000486996	0.0424494
Zm00001d006397	2.36779	0.000489705	0.0424687
Zm00001d036440	1.43266	0.000512936	0.044339
Zm00001d025057	2.20373	0.000537775	0.0461862
Zm00001d017648	4.13321	0.000555253	0.0463705
Zm00001d004306	4.5115	0.000561833	0.0466507
Zm00001d021897	3.90948	0.000718381	0.0469674
Zm00001d000914	3.91569	0.000594333	0.0487208
Zm00001d038178	2.39341	0.000579423	0.0491292

## Sheet: Mo17 × H95-48hpts
v4 Gene ID	log2FC	PValue	FDR
Zm00001d047192	6.97173	4.28456e-22	1.13434e-17
Zm00001d023320	-6.14853	3.70633e-20	4.90626e-16
Zm00001d007363	6.41558	9.84726e-20	8.6902e-16
Zm00001d018738	5.97516	6.10795e-17	4.0427e-13
Zm00001d045210	4.41517	9.75923e-17	4.30626e-13
Zm00001d020492	5.62193	8.67439e-17	4.30626e-13
Zm00001d020495	5.76203	2.82612e-16	1.06888e-12
Zm00001d023303	5.62694	3.24541e-16	1.07403e-12
Zm00001d032691	4.6707	5.20086e-16	1.52992e-12
Zm00001d042633	7.20745	1.52836e-14	4.04634e-11
Zm00001d023811	6.21157	1.78254e-14	4.29026e-11
Zm00001d031221	3.60186	5.70443e-14	1.16173e-10
Zm00001d023843	4.16917	6.2738e-14	1.18642e-10
Zm00001d030548	4.73769	1.68849e-13	2.98018e-10
Zm00001d037913	6.03075	4.6445e-13	7.68519e-10
Zm00001d043665	4.40729	6.57416e-13	1.02383e-09
Zm00001d029744	3.28132	1.00778e-12	1.48227e-09
Zm00001d032368	5.42791	1.52706e-12	2.12784e-09
Zm00001d042244	3.85806	1.60942e-12	2.13047e-09
Zm00001d010284	6.52729	1.23044e-11	1.43649e-08
Zm00001d024207	10.6801	1.14257e-11	1.43649e-08
Zm00001d035246	4.14408	1.24794e-11	1.43649e-08
Zm00001d048644	3.55999	1.53149e-11	1.68942e-08
Zm00001d046342	3.70802	1.97423e-11	2.09071e-08
Zm00001d023279	3.97424	4.3382e-11	4.41745e-08
Zm00001d003209	3.23464	7.88782e-11	7.73444e-08
Zm00001d043947	5.90833	8.68893e-11	8.21569e-08
Zm00001d031257	3.97015	2.34531e-10	2.01922e-07
Zm00001d029648	5.08279	2.24352e-10	2.01922e-07
Zm00001d019758	8.39332	2.36433e-10	2.01922e-07
Zm00001d045843	5.28886	2.44473e-10	2.02263e-07
Zm00001d011886	4.33037	2.78653e-10	2.23555e-07
Zm00001d012024	9.31885	2.94941e-10	2.29664e-07
Zm00001d014945	6.62075	3.36014e-10	2.54171e-07
Zm00001d002434	5.15189	7.48034e-10	5.35248e-07
Zm00001d031158	4.19693	7.31953e-10	5.35248e-07
Zm00001d014121	7.61697	1.93576e-09	1.34866e-06
Zm00001d023311	3.78277	2.53636e-09	1.7218e-06
Zm00001d048913	6.50341	3.56381e-09	2.3588e-06
Zm00001d021647	3.57462	3.99408e-09	2.5791e-06
Zm00001d022437	4.22873	4.3037e-09	2.64978e-06
Zm00001d045884	7.02493	4.23219e-09	2.64978e-06
Zm00001d033517	4.40884	7.98119e-09	4.80232e-06
Zm00001d002564	5.39385	9.18271e-09	5.40249e-06
Zm00001d025200	6.56253	1.04556e-08	6.01766e-06
Zm00001d021688	4.44262	1.1255e-08	6.3399e-06
Zm00001d024996	3.41257	1.208e-08	6.6629e-06
Zm00001d041768	4.29869	1.55555e-08	8.40474e-06
Zm00001d012281	8.72547	1.77138e-08	9.19554e-06
Zm00001d014001	6.83115	1.76082e-08	9.19554e-06
Zm00001d017969	6.64542	1.91814e-08	9.76589e-06
Zm00001d027946	4.8465	2.556e-08	1.27679e-05
Zm00001d042749	4.23323	2.75429e-08	1.35037e-05
Zm00001d048950	4.15687	3.39733e-08	1.63535e-05
Zm00001d052989	3.79243	3.95818e-08	1.8713e-05
Zm00001d047845	3.68412	4.53139e-08	2.10471e-05
Zm00001d037968	4.43767	4.76916e-08	2.17696e-05
Zm00001d049242	2.69355	5.15837e-08	2.31471e-05
Zm00001d009939	3.66583	5.86888e-08	2.58964e-05
Zm00001d042143	3.83391	6.61628e-08	2.87158e-05
Zm00001d021655	4.41789	8.56383e-08	3.65689e-05
Zm00001d048949	4.30062	1.04635e-07	4.39718e-05
Zm00001d023615	3.19005	1.09604e-07	4.53399e-05
Zm00001d049028	3.40706	1.28451e-07	5.2319e-05
Zm00001d034514	3.20068	1.34245e-07	5.38506e-05
Zm00001d053001	5.9138	2.30289e-07	9.09985e-05
Zm00001d033455	2.95929	3.13818e-07	0.000122181
Zm00001d005766	2.75082	3.31348e-07	0.000127137
Zm00001d021638	4.39924	3.39952e-07	0.000128575
Zm00001d041082	3.45432	3.61089e-07	0.000134646
Zm00001d023611	3.29889	5.60509e-07	0.000206104
Zm00001d044308	4.86665	7.10937e-07	0.000257836
Zm00001d024211	8.56048	1.2532e-06	0.000448357
Zm00001d031157	7.00996	1.37895e-06	0.000486768
Zm00001d037749	3.74389	1.45366e-06	0.000506391
Zm00001d014062	2.06036	1.63645e-06	0.000562662
Zm00001d017425	2.36018	1.69952e-06	0.000576855
Zm00001d036256	3.6493	2.00134e-06	0.000670702
Zm00001d000298	3.46467	2.08906e-06	0.000691349
Zm00001d014250	4.55105	2.13819e-06	0.000698872
Zm00001d044181	3.93214	2.41171e-06	0.000778658
Zm00001d045211	5.25078	2.71518e-06	0.000866077
Zm00001d020628	2.80701	2.76447e-06	0.000871301
Zm00001d043988	3.10966	3.04258e-06	0.000947674
Zm00001d034096	5.77864	3.22925e-06	0.000994122
Zm00001d018727	3.19142	3.58451e-06	0.0010908
Zm00001d050885	4.60987	4.79011e-06	0.00144111
Zm00001d040705	4.09836	4.91668e-06	0.00146257
Zm00001d027948	5.23428	5.28074e-06	0.00153635
Zm00001d043344	4.17096	5.25887e-06	0.00153635
Zm00001d032618	2.73015	5.35032e-06	0.00153967
Zm00001d039963	3.32559	5.59867e-06	0.00159382
Zm00001d042140	4.05793	6.24466e-06	0.0017588
Zm00001d036927	3.8341	6.47158e-06	0.00180353
Zm00001d034095	4.87354	6.76389e-06	0.00186536
Zm00001d011315	3.94244	6.99541e-06	0.00190931
Zm00001d027908	7.85703	7.43584e-06	0.00200881
Zm00001d024961	2.20679	7.68992e-06	0.00205647
Zm00001d036539	4.37125	8.86097e-06	0.00229994
Zm00001d024960	3.76493	8.80257e-06	0.00229994
Zm00001d051693	3.40295	1.07993e-05	0.00277584
Zm00001d006535	3.23494	1.12195e-05	0.00285611
Zm00001d031155	7.20309	1.15374e-05	0.00290906
Zm00001d048329	2.61386	1.38701e-05	0.00343189
Zm00001d028649	2.20215	1.52411e-05	0.00373076
Zm00001d014649	4.27833	1.53599e-05	0.00373076
Zm00001d020702	3.7451	1.76476e-05	0.00419558
Zm00001d046474	2.16243	1.7749e-05	0.00419558
Zm00001d007379	2.36732	2.68463e-05	0.00618049
Zm00001d019078	2.63901	2.77195e-05	0.00632651
Zm00001d042099	2.91377	2.913e-05	0.00653574
Zm00001d003365	3.53945	2.99574e-05	0.00662371
Zm00001d003356	2.18023	3.43309e-05	0.00751167
Zm00001d004734	2.10732	3.69068e-05	0.00800908
Zm00001d040152	3.41065	3.73469e-05	0.0080387
Zm00001d050259	2.59316	3.88126e-05	0.0082868
Zm00001d053055	2.35098	4.28682e-05	0.00900742
Zm00001d042553	2.45547	4.37016e-05	0.00911023
Zm00001d047436	2.23191	4.51188e-05	0.00933219
Zm00001d040780	1.8454	5.15838e-05	0.0105867
Zm00001d003048	2.38215	5.66406e-05	0.0115126
Zm00001d017121	2.45226	5.69648e-05	0.0115126
Zm00001d040777	1.69783	6.23089e-05	0.0124032
Zm00001d006536	3.43559	8.73248e-05	0.0170669
Zm00001d036550	2.27532	0.00011374	0.0213696
Zm00001d032240	3.1751	0.000112768	0.0213696
Zm00001d024752	3.64048	0.000116749	0.0217671
Zm00001d042948	2.01858	0.000117633	0.0217786
Zm00001d018627	1.84561	0.00012679	0.0229915
Zm00001d036370	1.95302	0.000130641	0.0235287
Zm00001d023267	1.76677	0.000168952	0.0290554
Zm00001d001943	2.63035	0.000178773	0.0301465
Zm00001d015616	2.70427	0.000196553	0.0324677
Zm00001d040326	2.6716	0.000202909	0.0331606
Zm00001d027524	1.5371	0.000212197	0.0344658
Zm00001d011625	1.81137	0.000225035	0.0363281
Zm00001d026426	2.32679	0.000233869	0.0372994
Zm00001d040245	2.61777	0.000240106	0.0380647
Zm00001d012900	2.00765	0.000243931	0.0384409
Zm00001d024665	6.9853	0.000255884	0.0424549
Zm00001d021167	3.66496	0.000362957	0.0473006

## Sheet: B73-22℃
v4 Gene ID	log2FC	PValue	FDR
Zm00001d032691	8.40052	6.49e-48	1.75e-43
Zm00001d010284	8.62465	3.52e-47	4.3e-43
Zm00001d037749	9.26892	5.6e-47	4.3e-43
Zm00001d036927	9.50416	6.39e-47	4.3e-43
Zm00001d024960	9.83492	1.29e-46	6.93e-43
Zm00001d023811	9.69788	5.12e-46	2.3e-42
Zm00001d031345	12.9661	7.89e-46	3.04e-42
Zm00001d050455	7.8715	2.75e-44	9.25e-41
Zm00001d023769	9.76954	4.34e-43	1.3e-39
Zm00001d012024	9.28578	1.52e-42	4.1e-39
Zm00001d042749	8.47585	3.92e-41	9.6e-38
Zm00001d001943	7.06695	1.91e-40	3.96e-37
Zm00001d045843	8.97974	1.87e-40	3.96e-37
Zm00001d018738	8.45962	2.23e-40	4.28e-37
Zm00001d031221	7.11735	2.58e-40	4.64e-37
Zm00001d031257	7.78881	1.45e-39	2.44e-36
Zm00001d043665	7.27771	1.92e-39	2.87e-36
Zm00001d014001	9.74619	1.92e-39	2.87e-36
Zm00001d043344	8.47744	3.71e-39	5.26e-36
Zm00001d050259	7.02549	4.53e-39	6.11e-36
Zm00001d031189	9.0838	8.01e-39	1.03e-35
Zm00001d014060	6.9239	1.1e-38	1.34e-35
Zm00001d020984	7.30158	1.51e-38	1.77e-35
Zm00001d007187	8.1731	1.66e-38	1.86e-35
Zm00001d043947	8.1645	1.82e-38	1.96e-35
Zm00001d042633	8.0743	1.46e-37	1.52e-34
Zm00001d014748	7.08671	2.01e-37	2.01e-34
Zm00001d044308	7.57907	3.95e-37	3.8e-34
Zm00001d025437	6.54588	4.69e-37	4.36e-34
Zm00001d045884	8.398	5.56e-37	4.99e-34
Zm00001d034095	8.64883	6.78e-37	5.89e-34
Zm00001d024763	6.49709	8.73e-37	7.35e-34
Zm00001d021647	7.58509	1.29e-36	1.05e-33
Zm00001d007363	8.23292	1.42e-36	1.12e-33
Zm00001d017425	7.34888	1.51e-36	1.13e-33
Zm00001d033517	7.01234	1.46e-36	1.13e-33
Zm00001d025012	7.36429	1.74e-36	1.27e-33
Zm00001d023843	6.41733	3.28e-36	2.32e-33
Zm00001d021688	6.79266	3.96e-36	2.74e-33
Zm00001d029397	6.57449	9e-36	6.06e-33
Zm00001d018701	8.60393	9.37e-36	6.15e-33
Zm00001d018734	7.07486	1.59e-35	1.02e-32
Zm00001d032368	8.32019	1.77e-35	1.11e-32
Zm00001d040786	9.22228	2.39e-35	1.47e-32
Zm00001d052989	6.36473	2.63e-35	1.57e-32
Zm00001d035162	7.29618	6.78e-35	3.97e-32
Zm00001d043622	8.26008	7.3e-35	4.19e-32
Zm00001d021638	6.60769	8.89e-35	4.99e-32
Zm00001d048913	9.1177	1.96e-34	1.08e-31
Zm00001d011886	7.23779	2.37e-34	1.28e-31
Zm00001d028816	7.89058	2.63e-34	1.39e-31
Zm00001d020163	8.27682	8.14e-34	4.22e-31
Zm00001d052744	6.05003	8.89e-34	4.52e-31
Zm00001d048644	6.81257	9.55e-34	4.76e-31
Zm00001d047192	8.81694	1.11e-33	5.43e-31
Zm00001d023774	8.55288	1.35e-33	6.51e-31
Zm00001d040705	6.90011	1.54e-33	7.26e-31
Zm00001d041768	8.20396	2.29e-33	1.04e-30
Zm00001d023768	9.77524	2.28e-33	1.04e-30
Zm00001d014121	9.14438	2.4e-33	1.08e-30
Zm00001d029648	9.47793	2.65e-33	1.17e-30
Zm00001d010870	6.71207	8.54e-33	3.71e-30
Zm00001d045210	6.46144	1.01e-32	4.32e-30
Zm00001d030548	8.17945	1.24e-32	5.23e-30
Zm00001d042099	9.30584	1.34e-32	5.56e-30
Zm00001d041082	7.11281	1.49e-32	5.99e-30
Zm00001d036539	8.18507	1.48e-32	5.99e-30
Zm00001d028814	7.11916	1.54e-32	6.11e-30
Zm00001d037968	5.72728	3.43e-32	1.34e-29
Zm00001d042140	7.38565	1.35e-31	5.21e-29
Zm00001d009945	8.82821	1.4e-31	5.3e-29
Zm00001d053001	10.02	1.5e-31	5.61e-29
Zm00001d032608	6.42456	1.75e-31	6.47e-29
Zm00001d019758	13.837	1.9e-31	6.9e-29
Zm00001d019078	6.66492	2.69e-31	9.66e-29
Zm00001d020702	6.89779	2.77e-31	9.81e-29
Zm00001d039963	5.92698	3.07e-31	1.07e-28
Zm00001d043544	6.49681	4.33e-31	1.5e-28
Zm00001d014945	8.54755	5.45e-31	1.86e-28
Zm00001d004238	8.19554	6.25e-31	2.1e-28
Zm00001d017008	12.0232	7.02e-31	2.33e-28
Zm00001d023779	5.55772	7.81e-31	2.56e-28
Zm00001d013004	8.76773	9.29e-31	3.02e-28
Zm00001d002178	11.9229	1.01e-30	3.23e-28
Zm00001d036256	7.28973	1.71e-30	5.42e-28
Zm00001d046342	7.37276	3.61e-30	1.13e-27
Zm00001d002434	6.1371	5.03e-30	1.56e-27
Zm00001d018727	7.16923	5.93e-30	1.81e-27
Zm00001d042104	6.40655	6.11e-30	1.85e-27
Zm00001d029247	9.61826	7.62e-30	2.28e-27
Zm00001d025057	5.7324	7.88e-30	2.33e-27
Zm00001d012281	8.79718	1.72e-29	5.02e-27
Zm00001d017014	5.87092	1.81e-29	5.23e-27
Zm00001d051166	6.21199	3.71e-29	1.06e-26
Zm00001d051157	5.81568	7.62e-29	2.16e-26
Zm00001d014649	7.44275	1.23e-28	3.42e-26
Zm00001d048329	5.56861	1.54e-28	4.22e-26
Zm00001d009999	7.14337	1.9e-28	5.15e-26
Zm00001d029847	6.28453	1.91e-28	5.15e-26
Zm00001d000294	7.83957	2.46e-28	6.57e-26
Zm00001d040468	5.58973	2.92e-28	7.72e-26
Zm00001d020714	5.9283	6.18e-28	1.62e-25
Zm00001d036550	5.70056	6.48e-28	1.68e-25
Zm00001d013617	8.4821	8.7e-28	2.23e-25
Zm00001d027946	8.19	1e-27	2.55e-25
Zm00001d024961	4.94825	1.16e-27	2.9e-25
Zm00001d031449	5.18267	1.16e-27	2.9e-25
Zm00001d006531	8.08127	1.33e-27	3.28e-25
Zm00001d000298	6.41523	1.88e-27	4.61e-25
Zm00001d002707	7.56763	2.39e-27	5.8e-25
Zm00001d025200	8.03191	4.66e-27	1.12e-24
Zm00001d040326	5.46438	1e-26	2.39e-24
Zm00001d021901	7.38852	1.02e-26	2.41e-24
Zm00001d045360	7.64895	1.2e-26	2.8e-24
Zm00001d048021	5.74562	1.21e-26	2.81e-24
Zm00001d024996	7.92897	1.26e-26	2.9e-24
Zm00001d022437	5.20598	1.47e-26	3.36e-24
Zm00001d044442	6.60984	1.79e-26	4.06e-24
Zm00001d033455	5.99415	2.1e-26	4.72e-24
Zm00001d037547	5.60406	2.89e-26	6.42e-24
Zm00001d028167	6.39476	3.33e-26	7.35e-24
Zm00001d038841	7.35191	4.44e-26	9.65e-24
Zm00001d021882	6.12846	4.42e-26	9.65e-24
Zm00001d050805	9.35483	4.97e-26	1.07e-23
Zm00001d046801	5.52317	5.34e-26	1.14e-23
Zm00001d042022	5.35255	7.31e-26	1.55e-23
Zm00001d053055	5.4926	8.18e-26	1.72e-23
Zm00001d044181	6.64902	8.68e-26	1.81e-23
Zm00001d015616	5.69098	1.93e-25	3.99e-23
Zm00001d005823	5.9239	2.15e-25	4.41e-23
Zm00001d042848	9.20551	2.56e-25	5.23e-23
Zm00001d013629	6.9343	2.74e-25	5.56e-23
Zm00001d026426	5.10533	3.05e-25	6.13e-23
Zm00001d028815	6.10999	3.44e-25	6.87e-23
Zm00001d040787	7.87477	6.63e-25	1.31e-22
Zm00001d021655	5.19944	1.26e-24	2.46e-22
Zm00001d027900	5.24536	1.73e-24	3.35e-22
Zm00001d038930	9.02213	2.25e-24	4.32e-22
Zm00001d035646	5.67706	2.64e-24	5.03e-22
Zm00001d020378	5.47365	4.15e-24	7.88e-22
Zm00001d032643	9.03744	4.69e-24	8.84e-22
Zm00001d040285	6.06126	7.96e-24	1.49e-21
Zm00001d031666	4.40259	9.33e-24	1.73e-21
Zm00001d020638	6.19684	1.44e-23	2.65e-21
Zm00001d052843	8.18215	1.58e-23	2.89e-21
Zm00001d035246	4.80419	1.79e-23	3.25e-21
Zm00001d029829	4.8305	2.05e-23	3.71e-21
Zm00001d017969	6.76077	2.36e-23	4.24e-21
Zm00001d033241	4.61946	2.38e-23	4.24e-21
Zm00001d050302	5.06534	2.83e-23	5.02e-21
Zm00001d032850	5.61422	3.17e-23	5.54e-21
Zm00001d027423	7.87664	3.17e-23	5.54e-21
Zm00001d043480	4.74231	3.43e-23	5.95e-21
Zm00001d011315	6.32129	4.06e-23	7e-21
Zm00001d043121	6.65197	4.15e-23	7.08e-21
Zm00001d044272	6.23751	4.14e-23	7.08e-21
Zm00001d016760	5.84002	4.79e-23	8.12e-21
Zm00001d018671	11.5951	5.87e-23	9.87e-21
Zm00001d040094	4.79175	6.76e-23	1.13e-20
Zm00001d004921	9.79994	6.94e-23	1.15e-20
Zm00001d032374	5.81874	1.13e-22	1.87e-20
Zm00001d017121	5.88787	1.63e-22	2.67e-20
Zm00001d039103	7.11297	2.92e-22	4.77e-20
Zm00001d047952	4.98785	3.35e-22	5.43e-20
Zm00001d041772	4.62192	3.71e-22	5.99e-20
Zm00001d037397	4.96299	5.71e-22	9.15e-20
Zm00001d046318	6.68836	7.94e-22	1.26e-19
Zm00001d030343	7.97246	8.57e-22	1.36e-19
Zm00001d000502	4.70859	1.61881e-21	2.33397e-19
Zm00001d046277	4.32343	1.81e-21	2.86e-19
Zm00001d045211	8.74615	1.94e-21	3.03e-19
Zm00001d042948	4.36821	2.44e-21	3.8e-19
Zm00001d028349	6.99042	2.6e-21	4.02e-19
Zm00001d014804	4.42206	3.16e-21	4.85e-19
Zm00001d042553	4.96591	3.17e-21	4.85e-19
Zm00001d002167	5.15012	3.53e-21	5.37e-19
Zm00001d035166	4.30108	3.97e-21	6e-19
Zm00001d006526	8.25818	6.03e-21	9.08e-19
Zm00001d023384	4.17415	6.24e-21	9.33e-19
Zm00001d031158	7.01648	8e-21	1.19e-18
Zm00001d036946	4.99023	8.13e-21	1.2e-18
Zm00001d012603	6.41044	8.63e-21	1.26e-18
Zm00001d017991	8.05073	8.6e-21	1.26e-18
Zm00001d013115	4.94109	8.74e-21	1.27e-18
Zm00001d003365	5.22324	1.53e-20	2.21e-18
Zm00001d053514	4.84451	1.59e-20	2.29e-18
Zm00001d026505	5.59757	1.97e-20	2.83e-18
Zm00001d016379	4.57665	2.23e-20	3.17e-18
Zm00001d040850	4.40734	2.93e-20	4.16e-18
Zm00001d003524	4.25678	3.31e-20	4.67e-18
Zm00001d025296	5.37492	3.81e-20	5.34e-18
Zm00001d008465	3.94629	4.24e-20	5.92e-18
Zm00001d025451	5.97694	5.33e-20	7.39e-18
Zm00001d015867	7.86171	5.98e-20	8.26e-18
Zm00001d040245	6.07182	6.14e-20	8.44e-18
Zm00001d021929	7.26514	6.34e-20	8.67e-18
Zm00001d002333	-4.00133	6.47e-20	8.75e-18
Zm00001d003447	11.1417	6.44e-20	8.75e-18
Zm00001d040101	4.66645	7.01e-20	9.43e-18
Zm00001d048950	7.19162	8.12e-20	1.09e-17
Zm00001d004906	7.76796	8.53e-20	1.14e-17
Zm00001d005766	5.33541	9.07e-20	1.2e-17
Zm00001d021897	6.19531	9.37e-20	1.24e-17
Zm00001d005977	3.96743	1.21e-19	1.59e-17
Zm00001d029359	9.75045	1.69e-19	2.2e-17
Zm00001d013830	4.51984	1.71e-19	2.23e-17
Zm00001d042244	7.27533	1.75e-19	2.26e-17
Zm00001d049242	4.32747	2.58e-19	3.32e-17
Zm00001d021695	5.03666	2.75e-19	3.53e-17
Zm00001d038551	4.88522	2.99e-19	3.81e-17
Zm00001d038503	5.11532	3.54e-19	4.49e-17
Zm00001d025401	4.70788	3.73e-19	4.72e-17
Zm00001d004972	6.24149	4.63769e-19	5.13283e-17
Zm00001d053733	5.43238	4.66e-19	5.87e-17
Zm00001d017381	7.25946	4.79e-19	6.01e-17
Zm00001d037916	5.56188	4.9e-19	6.11e-17
Zm00001d026255	6.55418	5.11e-19	6.35e-17
Zm00001d008853	8.3373	7.35e-19	9.07e-17
Zm00001d018686	10.6548	7.61e-19	9.35e-17
Zm00001d038555	4.07091	7.85e-19	9.61e-17
Zm00001d034217	4.45638	8.11e-19	9.88e-17
Zm00001d046554	4.03207	1.04e-18	1.26e-16
Zm00001d022334	6.20158	1.15e-18	1.39e-16
Zm00001d017152	4.21018	1.24e-18	1.49e-16
Zm00001d029744	4.10684	1.32e-18	1.58e-16
Zm00001d048949	7.21689	1.37e-18	1.64e-16
Zm00001d049330	4.38185	1.49e-18	1.77e-16
Zm00001d004738	5.62316	1.61e-18	1.9e-16
Zm00001d036715	3.86447	1.7e-18	1.99e-16
Zm00001d027948	10.078	1.99e-18	2.33e-16
Zm00001d007773	4.25563	2e-18	2.33e-16
Zm00001d033909	7.44717	2.18e-18	2.53e-16
Zm00001d025065	4.44602	2.26e-18	2.62e-16
Zm00001d029708	4.48775	2.54e-18	2.91e-16
Zm00001d011157	5.50403	2.53e-18	2.91e-16
Zm00001d019750	4.23407	2.56e-18	2.92e-16
Zm00001d049381	4.31557	2.58e-18	2.93e-16
Zm00001d018064	9.78618	2.63e-18	2.98e-16
Zm00001d030555	5.91093	2.92e-18	3.29e-16
Zm00001d024207	10.2217	3.99e-18	4.48e-16
Zm00001d032458	4.23512	4.39e-18	4.9e-16
Zm00001d003434	4.01761	4.44e-18	4.94e-16
Zm00001d014906	4.10149	4.56e-18	5.05e-16
Zm00001d042572	6.30432	4.66e-18	5.14e-16
Zm00001d043238	3.93545	4.74e-18	5.21e-16
Zm00001d013572	5.66377	4.93e-18	5.4e-16
Zm00001d015091	5.88323	5.26e-18	5.73e-16
Zm00001d034514	4.04513	6.9e-18	7.49e-16
Zm00001d032363	4.2267	7.69e-18	8.28e-16
Zm00001d046540	5.96067	7.67e-18	8.28e-16
Zm00001d018611	-4.37995	7.82e-18	8.39e-16
Zm00001d047845	4.86253	8.37e-18	8.94e-16
Zm00001d006528	3.73128	8.81e-18	9.38e-16
Zm00001d037073	7.58812	9.27e-18	9.82e-16
Zm00001d020351	5.40735	1.02e-17	1.08e-15
Zm00001d005423	3.68895	1.60798e-17	1.47895e-15
Zm00001d041838	5.555	1.46e-17	1.54e-15
Zm00001d003190	6.96841	1.48e-17	1.55e-15
Zm00001d003356	3.80544	1.5e-17	1.56e-15
Zm00001d011638	3.83072	1.78e-17	1.85e-15
Zm00001d005460	4.20443	1.96e-17	2.03e-15
Zm00001d006351	4.08029	1.99e-17	2.05e-15
Zm00001d028999	4.3347	2.04e-17	2.1e-15
Zm00001d030981	3.4901	2.09e-17	2.15e-15
Zm00001d029699	5.05158	2.55e-17	2.6e-15
Zm00001d021459	4.19562	2.58e-17	2.62e-15
Zm00001d018220	5.23115	2.63e-17	2.67e-15
Zm00001d003495	3.60047	2.85e-17	2.88e-15
Zm00001d003044	-4.30228	3.16e-17	3.18e-15
Zm00001d031223	4.01053	3.37e-17	3.38e-15
Zm00001d004075	3.56153	3.9e-17	3.89e-15
Zm00001d026366	5.65107	4.17e-17	4.15e-15
Zm00001d007789	3.74874	5.04e-17	4.99e-15
Zm00001d012899	3.89105	5.14e-17	5.07e-15
Zm00001d006199	3.81231	5.33e-17	5.24e-15
Zm00001d043988	6.12873	5.51e-17	5.4e-15
Zm00001d025654	3.91038	5.69e-17	5.56e-15
Zm00001d002436	3.96101	6.03e-17	5.86e-15
Zm00001d040785	10.9549	6.42e-17	6.22e-15
Zm00001d037383	-3.98892	7.81e-17	7.54e-15
Zm00001d019457	6.47299	9.22e-17	8.86e-15
Zm00001d008548	7.38657	9.65e-17	9.22e-15
Zm00001d045295	4.92241	9.65e-17	9.22e-15
Zm00001d044769	4.55775	9.95e-17	9.47e-15
Zm00001d027996	4.14502	1.04e-16	9.86e-15
Zm00001d024962	3.64764	1.05e-16	9.91e-15
Zm00001d037784	-4.2455	1.08e-16	1.01e-14
Zm00001d016637	10.2278	1.26e-16	1.18e-14
Zm00001d036293	4.13085	1.33e-16	1.25e-14
Zm00001d046746	3.79361	1.45e-16	1.35e-14
Zm00001d007403	-3.7871	1.58e-16	1.47e-14
Zm00001d042934	10.2799	1.7e-16	1.57e-14
Zm00001d006755	6.46823	2.07e-16	1.91e-14
Zm00001d009084	4.67278	2.1e-16	1.93e-14
Zm00001d008604	3.89062	2.12e-16	1.94e-14
Zm00001d017682	3.58662	2.24e-16	2.05e-14
Zm00001d004905	7.85494	2.62353e-16	2.11413e-14
Zm00001d014903	4.14018	2.48e-16	2.26e-14
Zm00001d032692	3.83101	2.51e-16	2.27e-14
Zm00001d020495	5.34913	2.63e-16	2.38e-14
Zm00001d042909	3.96646	2.66e-16	2.4e-14
Zm00001d022234	5.49297	2.77e-16	2.49e-14
Zm00001d014250	6.40001	3.04e-16	2.72e-14
Zm00001d032114	4.01186	3.18e-16	2.84e-14
Zm00001d006193	-5.36239	3.51e-16	3.12e-14
Zm00001d020915	4.23999	3.53e-16	3.12e-14
Zm00001d007329	7.41178	3.62e-16	3.2e-14
Zm00001d045361	6.10371	3.71e-16	3.26e-14
Zm00001d003287	3.35352	3.87e-16	3.4e-14
Zm00001d043651	4.52092	4.14e-16	3.62e-14
Zm00001d008489	3.74514	4.59e-16	4e-14
Zm00001d037005	6.46287	4.91e-16	4.26e-14
Zm00001d020492	4.76152	7.23e-16	6.26e-14
Zm00001d000001	4.42868	7.36e-16	6.35e-14
Zm00001d002755	7.5999	7.63e-16	6.56e-14
Zm00001d032618	5.43395	8.21e-16	7.04e-14
Zm00001d050885	6.37447	9.23e-16	7.89e-14
Zm00001d040777	3.66787	9.69e-16	8.26e-14
Zm00001d052245	4.86262	1.02e-15	8.67e-14
Zm00001d011644	4.19574	1.1e-15	9.34e-14
Zm00001d052999	10.0891	1.11e-15	9.38e-14
Zm00001d038820	3.83989	1.13e-15	9.54e-14
Zm00001d004305	3.95296	1.17e-15	9.8e-14
Zm00001d045788	5.07591	1.32e-15	1.1e-13
Zm00001d039459	10.2236	1.47e-15	1.23e-13
Zm00001d021977	6.73784	1.55e-15	1.29e-13
Zm00001d010616	5.75939	1.63e-15	1.35e-13
Zm00001d046234	3.92715	1.63e-15	1.35e-13
Zm00001d049068	4.76932	1.74e-15	1.43e-13
Zm00001d018431	5.84531	1.78e-15	1.46e-13
Zm00001d028467	4.46557	1.8e-15	1.47e-13
Zm00001d034129	5.96686	1.92e-15	1.56e-13
Zm00001d041574	10.043	1.97e-15	1.6e-13
Zm00001d036164	11.3071	2.04e-15	1.65e-13
Zm00001d012653	3.55953	2.04e-15	1.65e-13
Zm00001d042098	5.75967	2.24e-15	1.8e-13
Zm00001d045831	8.0766	2.35e-15	1.89e-13
Zm00001d037872	3.33784	2.35e-15	1.89e-13
Zm00001d051810	10.0079	2.57e-15	2.06e-13
Zm00001d042143	6.58422	2.73e-15	2.18e-13
Zm00001d020628	3.50376	2.84e-15	2.25e-13
Zm00001d042056	6.02783	3.11e-15	2.46e-13
Zm00001d012378	3.77459	3.22e-15	2.54e-13
Zm00001d037410	9.99857	4.15e-15	3.26e-13
Zm00001d050011	3.84625	4.24e-15	3.32e-13
Zm00001d012627	3.974	4.87e-15	3.8e-13
Zm00001d005028	4.32767	4.91e-15	3.82e-13
Zm00001d047638	4.41009	5e-15	3.88e-13
Zm00001d018681	10.0279	5.48e-15	4.23e-13
Zm00001d032069	3.83472	5.56e-15	4.28e-13
Zm00001d028572	3.87618	5.7e-15	4.36e-13
Zm00001d017271	3.51357	5.68e-15	4.36e-13
Zm00001d017766	-3.49779	5.99e-15	4.57e-13
Zm00001d011737	7.79053	6.53e-15	4.97e-13
Zm00001d019228	3.30611	6.9e-15	5.23e-13
Zm00001d011080	5.07345	7.31e-15	5.53e-13
Zm00001d042114	3.73905	7.45e-15	5.62e-13
Zm00001d051163	4.11301	7.96e-15	5.99e-13
Zm00001d027947	8.16314	9.1e-15	6.83e-13
Zm00001d039245	3.46067	9.72e-15	7.27e-13
Zm00001d016401	4.40147	1.05e-14	7.82e-13
Zm00001d041580	6.52367	1.11e-14	8.26e-13
Zm00001d035080	4.27744	1.15e-14	8.56e-13
Zm00001d017851	8.48123	1.2e-14	8.85e-13
Zm00001d038549	3.21284	1.25e-14	9.21e-13
Zm00001d048588	5.76338	1.29e-14	9.46e-13
Zm00001d035652	5.21422	1.4e-14	1.03e-12
Zm00001d047104	3.54814	1.49e-14	1.09e-12
Zm00001d048131	3.80737	1.55e-14	1.13e-12
Zm00001d024665	11.6687	1.66e-14	1.21e-12
Zm00001d035178	3.37171	1.73e-14	1.25e-12
Zm00001d011641	5.20606	1.89e-14	1.37e-12
Zm00001d017852	4.83303	1.9e-14	1.37e-12
Zm00001d032858	7.48289	2.05e-14	1.48e-12
Zm00001d044646	3.76936	2.13e-14	1.53e-12
Zm00001d021266	8.07887	2.32e-14	1.66e-12
Zm00001d014063	3.70989	2.41e-14	1.72e-12
Zm00001d017806	3.93978	2.48e-14	1.76e-12
Zm00001d003614	6.88679	2.51e-14	1.78e-12
Zm00001d048499	3.29843	2.52e-14	1.79e-12
Zm00001d009939	4.5879	2.69e-14	1.9e-12
Zm00001d028012	3.75599	2.86e-14	2.02e-12
Zm00001d049541	3.53276	2.92e-14	2.05e-12
Zm00001d017613	3.75372	2.97e-14	2.08e-12
Zm00001d020780	3.33146	2.99e-14	2.09e-12
Zm00001d033174	3.58798	3.15e-14	2.2e-12
Zm00001d030172	3.56473	3.38e-14	2.35e-12
Zm00001d014491	4.66959	3.95e-14	2.74e-12
Zm00001d016121	4.7939	4.06e-14	2.81e-12
Zm00001d042608	4.6267	4.48e-14	3.09e-12
Zm00001d046811	5.54377	4.79e-14	3.3e-12
Zm00001d000195	3.6986	4.86e-14	3.34e-12
Zm00001d043795	5.0545	5.06e-14	3.47e-12
Zm00001d027991	4.5766	5.34e-14	3.65e-12
Zm00001d027533	3.5644	5.44e-14	3.71e-12
Zm00001d047355	7.74342	5.48e-14	3.73e-12
Zm00001d053424	4.02608	5.74e-14	3.9e-12
Zm00001d004804	3.97874	5.82e-14	3.94e-12
Zm00001d024587	3.20215	5.93e-14	4e-12
Zm00001d021955	3.26858	6.27e-14	4.22e-12
Zm00001d052136	3.93698	6.45e-14	4.33e-12
Zm00001d006117	4.67007	7.09e-14	4.75e-12
Zm00001d033710	9.74627	7.85e-14	5.24e-12
Zm00001d039532	6.50619	7.87e-14	5.24e-12
Zm00001d024839	3.83285	8.03e-14	5.34e-12
Zm00001d052355	6.88493	8.37e-14	5.55e-12
Zm00001d046132	4.4045	8.76e-14	5.79e-12
Zm00001d008449	3.6088	8.94e-14	5.9e-12
Zm00001d014335	8.23469	9.26e-14	6.09e-12
Zm00001d007485	3.38994	9.49e-14	6.23e-12
Zm00001d043994	7.05905	9.95e-14	6.52e-12
Zm00001d035542	3.53237	1.09e-13	7.14e-12
Zm00001d017019	3.62411	1.11e-13	7.26e-12
Zm00001d034427	5.08075	1.12e-13	7.29e-12
Zm00001d043512	4.69318	1.14e-13	7.4e-12
Zm00001d006534	3.28368	1.18e-13	7.65e-12
Zm00001d038291	-3.90165	1.22e-13	7.87e-12
Zm00001d011438	4.61368	1.24e-13	8e-12
Zm00001d053554	3.42068	1.26e-13	8.08e-12
Zm00001d028093	3.47479	1.29e-13	8.25e-12
Zm00001d018627	3.26535	1.34e-13	8.55e-12
Zm00001d036647	7.69045	1.43e-13	9.1e-12
Zm00001d042868	3.46294	1.43e-13	9.1e-12
Zm00001d035767	-3.47814	1.5e-13	9.56e-12
Zm00001d036255	9.80332	1.58e-13	1e-11
Zm00001d010814	5.11744	1.63e-13	1.03e-11
Zm00001d045450	3.33226	1.64e-13	1.03e-11
Zm00001d009619	5.75121	1.68e-13	1.06e-11
Zm00001d052767	4.10627	1.76e-13	1.1e-11
Zm00001d050864	4.77851	1.78e-13	1.11e-11
Zm00001d034066	2.95683	1.8e-13	1.12e-11
Zm00001d027708	3.21226	1.98e-13	1.23e-11
Zm00001d053410	5.26518	2.06e-13	1.28e-11
Zm00001d039527	6.6577	2.06e-13	1.28e-11
Zm00001d005392	2.98013	2.08e-13	1.28e-11
Zm00001d033320	4.69234	2.1e-13	1.29e-11
Zm00001d008923	4.26801	2.09e-13	1.29e-11
Zm00001d039880	4.923	2.14e-13	1.31e-11
Zm00001d003657	9.69025	2.2e-13	1.35e-11
Zm00001d027415	3.98104	2.22e-13	1.36e-11
Zm00001d028962	3.22639	2.5e-13	1.52e-11
Zm00001d002974	3.82657	2.55e-13	1.55e-11
Zm00001d015397	5.11584	2.59e-13	1.57e-11
Zm00001d052189	9.6472	2.63e-13	1.59e-11
Zm00001d032152	3.47257	2.92e-13	1.76e-11
Zm00001d006538	5.95296	3e-13	1.8e-11
Zm00001d003283	6.2729	3.01e-13	1.81e-11
Zm00001d034097	8.18469	3.02e-13	1.81e-11
Zm00001d047664	5.1831	3.1e-13	1.86e-11
Zm00001d005594	2.92085	3.97436e-13	2.02305e-11
Zm00001d020136	3.07494	3.5e-13	2.09e-11
Zm00001d045862	9.63127	3.69e-13	2.2e-11
Zm00001d036370	5.45945	3.8e-13	2.25e-11
Zm00001d016635	3.53257	3.78e-13	2.25e-11
Zm00001d038791	3.86912	4.22e-13	2.5e-11
Zm00001d013046	4.04394	4.26e-13	2.52e-11
Zm00001d037215	3.04804	4.46e-13	2.63e-11
Zm00001d026488	5.3179	4.51e-13	2.65e-11
Zm00001d032240	5.05498	4.55e-13	2.67e-11
Zm00001d016586	3.09059	4.69e-13	2.75e-11
Zm00001d028879	9.6839	5.23e-13	3.06e-11
Zm00001d052690	5.78104	5.37e-13	3.13e-11
Zm00001d028912	4.97168	5.51e-13	3.2e-11
Zm00001d044235	3.75189	5.51e-13	3.2e-11
Zm00001d013151	7.69211	6.11e-13	3.54e-11
Zm00001d001832	7.27959	6.25e-13	3.61e-11
Zm00001d002899	6.72694	6.5e-13	3.75e-11
Zm00001d021089	9.75849	6.58e-13	3.79e-11
Zm00001d029794	3.95656	6.63e-13	3.8e-11
Zm00001d032527	3.40159	6.63e-13	3.8e-11
Zm00001d006446	-3.69328	6.98e-13	3.98e-11
Zm00001d046236	5.58818	6.97e-13	3.98e-11
Zm00001d029233	-4.19338	7.33e-13	4.17e-11
Zm00001d047436	3.50049	7.33e-13	4.17e-11
Zm00001d016166	3.78981	7.76e-13	4.4e-11
Zm00001d004768	3.32583	7.92e-13	4.47e-11
Zm00001d029662	4.36788	7.91e-13	4.47e-11
Zm00001d004847	7.41629	8.42e-13	4.74e-11
Zm00001d025924	2.99971	8.67e-13	4.88e-11
Zm00001d052317	4.49719	8.85e-13	4.96e-11
Zm00001d040244	3.18547	8.98e-13	5.03e-11
Zm00001d013997	3.19471	9.37e-13	5.23e-11
Zm00001d024752	5.13372	9.48e-13	5.28e-11
Zm00001d013098	2.92228	1.01e-12	5.64e-11
Zm00001d038325	3.60509	1.02e-12	5.66e-11
Zm00001d029617	6.19795	1.03e-12	5.7e-11
Zm00001d003364	9.59414	1.05e-12	5.81e-11
Zm00001d016891	2.91106	1.08e-12	5.94e-11
Zm00001d002536	9.54811	1.13e-12	6.21e-11
Zm00001d030544	3.36846	1.13e-12	6.21e-11
Zm00001d050224	3.43972	1.21e-12	6.61e-11
Zm00001d002898	7.40233	1.23e-12	6.76e-11
Zm00001d012900	3.85596	1.27e-12	6.95e-11
Zm00001d044117	-2.90814	1.29e-12	7.02e-11
Zm00001d020808	-3.13326	1.3e-12	7.07e-11
Zm00001d006330	4.00811	1.33e-12	7.21e-11
Zm00001d043301	3.23916	1.39e-12	7.55e-11
Zm00001d017276	3.29892	1.43e-12	7.74e-11
Zm00001d023611	3.39634	1.51e-12	8.13e-11
Zm00001d043411	5.22541	1.53e-12	8.24e-11
Zm00001d013099	9.86935	1.53e-12	8.24e-11
Zm00001d004525	3.00847	1.6e-12	8.58e-11
Zm00001d013057	4.75629	1.63e-12	8.71e-11
Zm00001d041787	4.22814	1.63e-12	8.71e-11
Zm00001d029628	4.16973	1.64e-12	8.73e-11
Zm00001d021303	6.13606	1.67e-12	8.87e-11
Zm00001d009296	7.94855	1.7e-12	9.01e-11
Zm00001d011643	4.6365	1.71e-12	9.08e-11
Zm00001d035401	4.23048	1.8e-12	9.53e-11
Zm00001d040029	5.81631	1.95e-12	1.03e-10
Zm00001d038262	3.65382	1.96e-12	1.03e-10
Zm00001d041327	4.21018	2.07e-12	1.09e-10
Zm00001d027908	10.5946	2.21e-12	1.16e-10
Zm00001d027995	2.89335	2.22e-12	1.16e-10
Zm00001d006374	3.0105	2.27e-12	1.19e-10
Zm00001d022264	-3.25849	2.32e-12	1.21e-10
Zm00001d052172	9.62946	2.36e-12	1.23e-10
Zm00001d024843	4.1635	2.36e-12	1.23e-10
Zm00001d012636	4.77482	2.39e-12	1.24e-10
Zm00001d004306	6.63906	2.63e-12	1.36e-10
Zm00001d040050	9.6393	2.68e-12	1.39e-10
Zm00001d046634	6.71038	2.78e-12	1.43e-10
Zm00001d052220	3.71459	2.79e-12	1.43e-10
Zm00001d012430	9.47142	2.84e-12	1.46e-10
Zm00001d007285	4.64052	2.96e-12	1.52e-10
Zm00001d003530	-3.1539	3.07e-12	1.57e-10
Zm00001d052346	3.35801	3.09e-12	1.58e-10
Zm00001d042933	7.97385	3.16e-12	1.61e-10
Zm00001d018691	4.13658	3.69107e-12	1.64911e-10
Zm00001d016457	6.5983	3.35e-12	1.7e-10
Zm00001d008457	2.80509	3.44e-12	1.75e-10
Zm00001d029597	2.93597	3.47e-12	1.76e-10
Zm00001d023664	4.04614	3.69e-12	1.87e-10
Zm00001d031157	6.93851	3.77e-12	1.91e-10
Zm00001d003966	2.85493	4.04e-12	2.04e-10
Zm00001d008273	4.1692	4.24e-12	2.14e-10
Zm00001d006397	3.14589	4.38e-12	2.2e-10
Zm00001d017462	4.52058	4.52e-12	2.27e-10
Zm00001d005315	4.11857	4.64e-12	2.32e-10
Zm00001d003355	3.73782	4.73e-12	2.36e-10
Zm00001d038178	5.04922	4.76e-12	2.37e-10
Zm00001d048741	3.32652	4.79e-12	2.39e-10
Zm00001d004689	-3.66289	4.88e-12	2.43e-10
Zm00001d039567	4.58785	4.93e-12	2.44e-10
Zm00001d053781	9.44519	5.03e-12	2.49e-10
Zm00001d021176	7.67715	5.05e-12	2.49e-10
Zm00001d017976	5.8051	5.8e-12	2.86e-10
Zm00001d025761	4.06257	6.01e-12	2.95e-10
Zm00001d041025	4.20778	6e-12	2.95e-10
Zm00001d028870	6.66	6.05e-12	2.97e-10
Zm00001d013644	3.82135	6.24e-12	3.05e-10
Zm00001d034073	3.36754	6.23e-12	3.05e-10
Zm00001d016285	3.05054	6.29e-12	3.07e-10
Zm00001d017965	5.49035	6.33e-12	3.08e-10
Zm00001d003209	3.44733	6.43e-12	3.13e-10
Zm00001d037759	4.66326	6.48e-12	3.15e-10
Zm00001d031222	4.60441	6.5e-12	3.15e-10
Zm00001d021192	4.36561	6.56e-12	3.17e-10
Zm00001d010388	4.78706	6.77e-12	3.27e-10
Zm00001d048947	6.16402	6.92e-12	3.33e-10
Zm00001d052545	4.20311	7.03e-12	3.38e-10
Zm00001d049239	3.13499	7.09e-12	3.41e-10
Zm00001d006535	3.99416	7.34e-12	3.52e-10
Zm00001d053995	4.51546	7.37e-12	3.52e-10
Zm00001d038365	-3.27204	7.61e-12	3.63e-10
Zm00001d014650	6.57956	7.64e-12	3.64e-10
Zm00001d041716	3.10643	7.68e-12	3.65e-10
Zm00001d033624	3.29649	7.68e-12	3.65e-10
Zm00001d009365	3.19741	7.9e-12	3.75e-10
Zm00001d015618	2.9002	8.33e-12	3.94e-10
Zm00001d039799	5.95034	8.86e-12	4.18e-10
Zm00001d013473	6.49695	9.17e-12	4.32e-10
Zm00001d009603	-2.88231	9.2e-12	4.33e-10
Zm00001d016705	3.95903	1.01e-11	4.74e-10
Zm00001d043166	2.9966	1.03e-11	4.83e-10
Zm00001d038064	4.84901	1.06e-11	4.96e-10
Zm00001d046468	3.34765	1.08e-11	5.04e-10
Zm00001d051525	3.65514	1.13e-11	5.27e-10
Zm00001d036668	2.82025	1.15e-11	5.33e-10
Zm00001d027892	4.13628	1.14e-11	5.33e-10
Zm00001d010399	2.97366	1.18e-11	5.46e-10
Zm00001d002302	6.46411	1.23e-11	5.72e-10
Zm00001d012322	4.39232	1.25e-11	5.78e-10
Zm00001d043610	4.66995	1.44e-11	6.66e-10
Zm00001d046474	2.81579	1.54e-11	7.11e-10
Zm00001d014944	4.03573	1.55e-11	7.14e-10
Zm00001d017912	3.32165	1.56e-11	7.16e-10
Zm00001d008468	3.01964	1.56e-11	7.17e-10
Zm00001d017713	9.55326	1.57e-11	7.21e-10
Zm00001d021677	6.7339	1.6e-11	7.33e-10
Zm00001d049732	3.27752	1.74e-11	7.94e-10
Zm00001d010115	3.07146	1.78e-11	8.09e-10
Zm00001d020544	4.83325	1.79e-11	8.16e-10
Zm00001d047752	7.10714	1.83e-11	8.3e-10
Zm00001d048861	4.90579	1.85e-11	8.38e-10
Zm00001d029410	2.85456	1.95e-11	8.83e-10
Zm00001d003483	6.06135	2.02e-11	9.11e-10
Zm00001d010800	7.095	2.02e-11	9.12e-10
Zm00001d024778	3.16283	2.27e-11	1.02e-09
Zm00001d041763	-3.55113	2.32e-11	1.04e-09
Zm00001d016014	3.2322	2.33e-11	1.04e-09
Zm00001d050803	9.26833	2.34e-11	1.05e-09
Zm00001d051658	6.73901	2.37e-11	1.06e-09
Zm00001d050671	7.34471	2.36e-11	1.06e-09
Zm00001d039118	-3.35096	2.48e-11	1.1e-09
Zm00001d044777	4.71136	2.46e-11	1.1e-09
Zm00001d024210	8.07367	2.83335e-11	1.10812e-09
Zm00001d042274	2.89368	2.49e-11	1.11e-09
Zm00001d023617	5.77919	2.59e-11	1.15e-09
Zm00001d020261	7.06293	2.62e-11	1.16e-09
Zm00001d036401	3.03989	2.64e-11	1.17e-09
Zm00001d037913	3.00765	2.75e-11	1.21e-09
Zm00001d001818	5.52402	3.23972e-11	1.2652e-09
Zm00001d047452	-4.23721	3e-11	1.32e-09
Zm00001d020985	7.06179	3.31e-11	1.46e-09
Zm00001d046745	3.4792	3.35e-11	1.47e-09
Zm00001d053268,Zm00001d053269	6.35508	3.4e-11	1.49e-09
Zm00001d040183	2.90858	3.46e-11	1.51e-09
Zm00001d000060	-2.84468	3.63e-11	1.59e-09
Zm00001d049704	6.49843	3.63e-11	1.59e-09
Zm00001d029078	-2.98152	3.77e-11	1.64e-09
Zm00001d001774	4.17172	4.33769e-11	1.65996e-09
Zm00001d042136	3.44171	3.91e-11	1.7e-09
Zm00001d042337	4.08587	3.93e-11	1.71e-09
Zm00001d032356	3.42756	4.02e-11	1.74e-09
Zm00001d002181	2.76343	4.03e-11	1.75e-09
Zm00001d039764	4.83347	4.07e-11	1.76e-09
Zm00001d011269	3.79718	4.14e-11	1.79e-09
Zm00001d034277	9.07715	4.35e-11	1.87e-09
Zm00001d015968	2.79487	4.37e-11	1.88e-09
Zm00001d022041	2.62551	4.38e-11	1.88e-09
Zm00001d042950	2.9151	4.49e-11	1.93e-09
Zm00001d016664	3.4125	4.61e-11	1.98e-09
Zm00001d036328	2.77858	4.78e-11	2.04e-09
Zm00001d004734	2.76844	4.88e-11	2.08e-09
Zm00001d002021	2.72936	5.07e-11	2.16e-09
Zm00001d036261	3.07003	5.07e-11	2.16e-09
Zm00001d032745	5.29644	5.18e-11	2.2e-09
Zm00001d005936	5.10743	5.2e-11	2.2e-09
Zm00001d032992	-2.71808	5.3e-11	2.25e-09
Zm00001d016806	5.00673	5.63e-11	2.38e-09
Zm00001d046945	3.11932	5.83e-11	2.46e-09
Zm00001d000977	6.8297	6.67544e-11	2.48332e-09
Zm00001d052190	9.31068	6e-11	2.52e-09
Zm00001d002673	3.90036	6e-11	2.52e-09
Zm00001d038638	3.42627	6.13e-11	2.57e-09
Zm00001d039535	3.05948	6.28e-11	2.63e-09
Zm00001d006053	6.98479	6.44e-11	2.69e-09
Zm00001d019361	3.11888	6.43e-11	2.69e-09
Zm00001d042875	5.49183	6.51e-11	2.72e-09
Zm00001d027622	4.01873	6.66e-11	2.78e-09
Zm00001d029025	4.83826	6.86e-11	2.86e-09
Zm00001d039183	4.53372	7e-11	2.91e-09
Zm00001d015446	2.65868	7.2e-11	2.99e-09
Zm00001d038451	5.84821	8.13e-11	3.37e-09
Zm00001d048702	-2.79459	8.29e-11	3.43e-09
Zm00001d014993	3.02395	8.37e-11	3.46e-09
Zm00001d017420	4.82489	8.5e-11	3.51e-09
Zm00001d011056	4.62203	8.56e-11	3.52e-09
Zm00001d030542	4.47856	8.77e-11	3.6e-09
Zm00001d048709	-4.65031	9.89e-11	4.06e-09
Zm00001d007831	5.66928	1.04e-10	4.27e-09
Zm00001d029497	2.61837	1.07e-10	4.39e-09
Zm00001d053212	4.0044	1.17e-10	4.77e-09
Zm00001d026572	3.44135	1.18e-10	4.83e-09
Zm00001d042134	4.50129	1.21e-10	4.92e-09
Zm00001d028374	8.96848	1.21e-10	4.92e-09
Zm00001d012173	2.60895	1.22e-10	4.94e-09
Zm00001d028785	2.59206	1.25e-10	5.06e-09
Zm00001d033389	5.26468	1.28e-10	5.19e-09
Zm00001d005542	3.25193	1.29e-10	5.2e-09
Zm00001d043258	5.51174	1.3e-10	5.25e-09
Zm00001d039769	2.84068	1.31e-10	5.27e-09
Zm00001d024352	6.90162	1.32e-10	5.3e-09
Zm00001d039712	2.80601	1.34e-10	5.38e-09
Zm00001d017849	3.80118	1.36e-10	5.44e-09
Zm00001d016676	-4.04466	1.38e-10	5.54e-09
Zm00001d038991	2.77772	1.4e-10	5.6e-09
Zm00001d050132	2.63366	1.49e-10	5.93e-09
Zm00001d043838	3.5201	1.51e-10	6.02e-09
Zm00001d006069	4.39813	1.52e-10	6.03e-09
Zm00001d052990	2.79754	1.6e-10	6.35e-09
Zm00001d013751	2.85967	1.64e-10	6.48e-09
Zm00001d023208	-2.84421	1.63e-10	6.48e-09
Zm00001d051001	3.11637	1.66e-10	6.58e-09
Zm00001d033003	4.84084	1.68e-10	6.64e-09
Zm00001d021497	4.9404	1.69e-10	6.67e-09
Zm00001d053409	2.97699	1.75e-10	6.87e-09
Zm00001d012427	10.2689	1.75e-10	6.87e-09
Zm00001d035055	4.16699	1.76e-10	6.91e-09
Zm00001d024522	5.05666	1.79e-10	7.01e-09
Zm00001d031351	2.83753	1.83e-10	7.18e-09
Zm00001d028465	2.57089	1.87e-10	7.3e-09
Zm00001d048690	6.96836	1.91e-10	7.44e-09
Zm00001d011736	4.22944	1.91e-10	7.44e-09
Zm00001d031164	5.15588	1.91e-10	7.44e-09
Zm00001d029803	-3.01056	1.93e-10	7.5e-09
Zm00001d051653	5.40855	1.95e-10	7.57e-09
Zm00001d035865	5.93359	2e-10	7.73e-09
Zm00001d002592	6.79478	2e-10	7.73e-09
Zm00001d037636	-2.74885	2.05e-10	7.92e-09
Zm00001d005620	8.922	2.05e-10	7.93e-09
Zm00001d018966	3.87928	2.08e-10	8e-09
Zm00001d025016	3.08252	2.14e-10	8.23e-09
Zm00001d024486	9.12105	2.14e-10	8.23e-09
Zm00001d021726	4.28975	2.26e-10	8.65e-09
Zm00001d038484	2.63173	2.28e-10	8.73e-09
Zm00001d027949	6.58791	2.29e-10	8.73e-09
Zm00001d036482	3.30568	2.28e-10	8.73e-09
Zm00001d035046	3.64949	2.29e-10	8.75e-09
Zm00001d044162	5.53352	2.32e-10	8.83e-09
Zm00001d027680	2.71454	2.63241e-10	8.97882e-09
Zm00001d004731	3.44939	2.38e-10	9.05e-09
Zm00001d048333	4.3763	2.49e-10	9.47e-09
Zm00001d014717	4.3442	2.53e-10	9.59e-09
Zm00001d011628	3.05369	2.55e-10	9.65e-09
Zm00001d031152	4.60004	2.62e-10	9.9e-09
Zm00001d048832	5.25172	2.62e-10	9.91e-09
Zm00001d011967	4.30658	2.65e-10	9.99e-09
Zm00001d042207	2.76318	2.74e-10	1.03e-08
Zm00001d038905	2.70176	2.77e-10	1.04e-08
Zm00001d044654	2.91262	2.81e-10	1.06e-08
Zm00001d010049	6.18412	3e-10	1.12e-08
Zm00001d012604	2.88814	2.99e-10	1.12e-08
Zm00001d007379	3.10437	3.02e-10	1.13e-08
Zm00001d013945	6.64375	3.02e-10	1.13e-08
Zm00001d044024	-3.38105	3.19e-10	1.19e-08
Zm00001d003848	-2.63969	3.27e-10	1.22e-08
Zm00001d051194	-4.24971	3.28e-10	1.22e-08
Zm00001d045800	2.70593	3.31e-10	1.23e-08
Zm00001d039384	4.86805	3.35e-10	1.24e-08
Zm00001d037354	3.12644	3.46e-10	1.28e-08
Zm00001d014351	5.00819	3.54e-10	1.31e-08
Zm00001d021583	4.96117	3.58e-10	1.32e-08
Zm00001d050164	3.90063	3.67e-10	1.35e-08
Zm00001d051901	2.73442	3.73e-10	1.37e-08
Zm00001d032854	5.0257	3.72e-10	1.37e-08
Zm00001d002393	9.36648	3.94e-10	1.44e-08
Zm00001d000824	5.15883	4.34982e-10	1.45028e-08
Zm00001d037035	2.63543	4.18e-10	1.53e-08
Zm00001d024291	2.58724	4.51e-10	1.65e-08
Zm00001d018631	2.99583	4.78e-10	1.74e-08
Zm00001d006214	-2.53272	4.8e-10	1.75e-08
Zm00001d039173	2.76982	4.84e-10	1.76e-08
Zm00001d030942	3.8507	4.88e-10	1.77e-08
Zm00001d033574	2.62715	4.94e-10	1.79e-08
Zm00001d023530	-2.90163	5e-10	1.81e-08
Zm00001d009473	6.62071	4.99e-10	1.81e-08
Zm00001d011629	2.96644	5.04e-10	1.82e-08
Zm00001d048647	3.59805	5.07e-10	1.83e-08
Zm00001d054043	2.9669	5.22e-10	1.88e-08
Zm00001d002725	2.51766	5.25e-10	1.89e-08
Zm00001d029258	2.65655	5.28e-10	1.9e-08
Zm00001d037630	6.34472	5.28e-10	1.9e-08
Zm00001d022430	6.77885	5.4e-10	1.94e-08
Zm00001d034096	6.16933	5.48e-10	1.96e-08
Zm00001d012731	-2.88389	5.58e-10	2e-08
Zm00001d045785	2.88018	5.63e-10	2.01e-08
Zm00001d048705	-2.64664	5.76e-10	2.06e-08
Zm00001d038913	5.60331	5.93e-10	2.11e-08
Zm00001d038199	-4.09618	5.98e-10	2.13e-08
Zm00001d012527	3.00783	6.14e-10	2.18e-08
Zm00001d008258	3.81658	6.22e-10	2.21e-08
Zm00001d052268	4.64943	6.34e-10	2.24e-08
Zm00001d051468	8.76328	6.32e-10	2.24e-08
Zm00001d038115	3.24104	6.38e-10	2.25e-08
Zm00001d030212	3.55845	6.36e-10	2.25e-08
Zm00001d052322	2.96842	6.41e-10	2.26e-08
Zm00001d000002	4.36959	6.54e-10	2.3e-08
Zm00001d029703	8.87094	6.6e-10	2.32e-08
Zm00001d009222	9.16652	6.68e-10	2.35e-08
Zm00001d036761	3.74049	7.08e-10	2.48e-08
Zm00001d002700	-2.57298	7.38e-10	2.58e-08
Zm00001d052244	4.02084	7.37e-10	2.58e-08
Zm00001d034365	2.85883	7.84e-10	2.73e-08
Zm00001d038548	3.39318	7.88e-10	2.75e-08
Zm00001d002475	2.90303	8.11e-10	2.82e-08
Zm00001d026041	6.49752	8.42e-10	2.93e-08
Zm00001d043701	5.11766	8.66e-10	3.01e-08
Zm00001d029684	2.66744	8.87e-10	3.07e-08
Zm00001d037435	3.6481	9.17e-10	3.17e-08
Zm00001d034497	2.69937	1.02e-09	3.51e-08
Zm00001d010961	4.60773	1.04e-09	3.6e-08
Zm00001d040023	3.49367	1.04e-09	3.6e-08
Zm00001d039824	4.25261	1.06e-09	3.64e-08
Zm00001d038728	-2.57548	1.08e-09	3.72e-08
Zm00001d035163	2.55585	1.1e-09	3.79e-08
Zm00001d017869	-2.64917	1.11e-09	3.8e-08
Zm00001d011625	2.50782	1.14e-09	3.9e-08
Zm00001d036014	-2.67462	1.15e-09	3.95e-08
Zm00001d008976	3.16271	1.2e-09	4.11e-08
Zm00001d039772	-3.79647	1.26e-09	4.31e-08
Zm00001d038882	-2.71429	1.3e-09	4.44e-08
Zm00001d049632	2.56437	1.38e-09	4.69e-08
Zm00001d046334	-2.53753	1.39e-09	4.72e-08
Zm00001d009599	-3.82211	1.43e-09	4.84e-08
Zm00001d039825	3.35425	1.44e-09	4.89e-08
Zm00001d041726	6.59234	1.45e-09	4.9e-08
Zm00001d040265	-3.8895	1.52e-09	5.14e-08
Zm00001d034145	2.97826	1.66e-09	5.61e-08
Zm00001d043853	2.9195	1.67e-09	5.65e-08
Zm00001d007180	3.91905	1.7e-09	5.74e-08
Zm00001d046149	4.78884	1.71e-09	5.76e-08
Zm00001d023918	2.38053	1.73e-09	5.82e-08
Zm00001d021680	2.46884	1.78e-09	5.98e-08
Zm00001d037909	4.42054	1.86e-09	6.23e-08
Zm00001d015627	6.72153	1.9e-09	6.38e-08
Zm00001d007714	8.8258	1.93e-09	6.46e-08
Zm00001d040067	3.16326	1.93e-09	6.46e-08
Zm00001d011164	3.69619	1.96e-09	6.54e-08
Zm00001d019479	-2.88598	1.98e-09	6.59e-08
Zm00001d026042	2.51811	2e-09	6.66e-08
Zm00001d048087	6.5967	2.04e-09	6.79e-08
Zm00001d029594	2.63077	2.14e-09	7.12e-08
Zm00001d033457	-2.53345	2.19e-09	7.26e-08
Zm00001d013245	2.70311	2.22e-09	7.35e-08
Zm00001d023554	4.33946	2.24e-09	7.39e-08
Zm00001d029371	4.7359	2.24e-09	7.4e-08
Zm00001d007753	2.86858	2.3e-09	7.58e-08
Zm00001d017696	5.67658	2.31e-09	7.61e-08
Zm00001d002847	3.28354	2.32e-09	7.61e-08
Zm00001d031922	4.73591	2.33e-09	7.64e-08
Zm00001d020886	5.10791	2.35e-09	7.69e-08
Zm00001d012477	9.58912	2.37e-09	7.77e-08
Zm00001d049213	5.10897	2.39e-09	7.81e-08
Zm00001d028987	2.64834	2.45e-09	8.01e-08
Zm00001d052118	-2.84488	2.46e-09	8.03e-08
Zm00001d017380	4.4271	2.47e-09	8.06e-08
Zm00001d031155	9.00549	2.48e-09	8.09e-08
Zm00001d053623	2.41976	2.49e-09	8.09e-08
Zm00001d032102	3.65585	2.57e-09	8.35e-08
Zm00001d034322	8.55187	2.58e-09	8.36e-08
Zm00001d013977	5.69265	2.59e-09	8.41e-08
Zm00001d037982	-2.77468	2.74e-09	8.86e-08
Zm00001d004908	5.00759	2.75e-09	8.89e-08
Zm00001d009071	-2.60985	2.76e-09	8.92e-08
Zm00001d042260	4.87768	2.78e-09	8.97e-08
Zm00001d047591	3.02741	2.81e-09	9.04e-08
Zm00001d010411	-2.92387	2.86e-09	9.21e-08
Zm00001d027449	3.12963	2.89e-09	9.28e-08
Zm00001d005158	3.01933	2.93e-09	9.4e-08
Zm00001d005306	2.56789	3e-09	9.6e-08
Zm00001d047351	2.62028	3.03e-09	9.72e-08
Zm00001d024852	9.56381	3.04e-09	9.72e-08
Zm00001d028004	5.277	3.08e-09	9.85e-08
Zm00001d037322	8.55162	3.15e-09	1.01e-07
Zm00001d035236	2.67112	3.2e-09	1.02e-07
Zm00001d034015	2.8223	3.33e-09	1.06e-07
Zm00001d035689	5.07113	3.43e-09	1.09e-07
Zm00001d052164	-3.52152	3.49e-09	1.11e-07
Zm00001d016103	5.22803	3.57e-09	1.13e-07
Zm00001d006034	2.3783	3.59e-09	1.14e-07
Zm00001d028667	5.78359	3.65e-09	1.15e-07
Zm00001d030108	2.45793	3.64e-09	1.15e-07
Zm00001d045839	2.43789	3.63e-09	1.15e-07
Zm00001d047252	-2.45683	3.7e-09	1.16e-07
Zm00001d005470	2.82	3.67e-09	1.16e-07
Zm00001d004624	-3.17744	3.73e-09	1.17e-07
Zm00001d037519	-2.75953	3.79e-09	1.19e-07
Zm00001d014129	2.46939	3.8e-09	1.19e-07
Zm00001d039788	8.55751	3.84e-09	1.2e-07
Zm00001d053778	2.54527	4.03e-09	1.26e-07
Zm00001d008479	3.3959	4.03e-09	1.26e-07
Zm00001d024835	-2.49893	4.06e-09	1.27e-07
Zm00001d011459	3.94024	4.15e-09	1.29e-07
Zm00001d028721	8.5544	4.23e-09	1.32e-07
Zm00001d034508	6.06915	4.24e-09	1.32e-07
Zm00001d041363	2.57972	4.28e-09	1.33e-07
Zm00001d013335	2.65508	4.28e-09	1.33e-07
Zm00001d017186	2.60033	4.42e-09	1.37e-07
Zm00001d024543	2.4092	4.45e-09	1.38e-07
Zm00001d043505	-2.64591	4.47e-09	1.38e-07
Zm00001d028230	2.6103	4.48e-09	1.39e-07
Zm00001d001900	3.46151	4.52e-09	1.4e-07
Zm00001d018803	3.54156	4.58e-09	1.41e-07
Zm00001d021442	-2.59887	4.61e-09	1.42e-07
Zm00001d034859	2.46096	4.62e-09	1.42e-07
Zm00001d028649	2.332	4.71e-09	1.45e-07
Zm00001d034417	3.34549	4.75e-09	1.46e-07
Zm00001d049785	-2.38309	4.8e-09	1.47e-07
Zm00001d003903	9.11466	4.78e-09	1.47e-07
Zm00001d047349	2.5716	4.85e-09	1.48e-07
Zm00001d036951	2.45194	4.86e-09	1.49e-07
Zm00001d038020	-2.76044	5e-09	1.53e-07
Zm00001d044100	8.48316	5.04e-09	1.54e-07
Zm00001d010735	9.06493	5.36e-09	1.63e-07
Zm00001d007186	2.42403	5.35e-09	1.63e-07
Zm00001d044639	2.87664	5.55e-09	1.69e-07
Zm00001d029501	3.47864	5.63e-09	1.71e-07
Zm00001d021461	8.51446	5.78e-09	1.75e-07
Zm00001d018161	-2.79717	5.84e-09	1.77e-07
Zm00001d022092	3.48577	5.83e-09	1.77e-07
Zm00001d043870	2.46312	5.85e-09	1.77e-07
Zm00001d045051	3.89354	5.87e-09	1.77e-07
Zm00001d043569	2.73658	6.01e-09	1.81e-07
Zm00001d003954	-2.29505	5.99e-09	1.81e-07
Zm00001d045359	2.78863	6.16e-09	1.85e-07
Zm00001d010171	2.69761	6.34e-09	1.9e-07
Zm00001d045042	2.56375	6.39e-09	1.92e-07
Zm00001d012988	-2.54988	6.59e-09	1.98e-07
Zm00001d035659	-2.46556	6.6e-09	1.98e-07
Zm00001d010693	-2.43125	6.83e-09	2.04e-07
Zm00001d049217	5.16243	6.94e-09	2.07e-07
Zm00001d035662	-2.44621	7.57e-09	2.26e-07
Zm00001d033567	2.60857	7.61e-09	2.27e-07
Zm00001d003949	-2.89971	7.83e-09	2.33e-07
Zm00001d009938	2.86084	7.87e-09	2.34e-07
Zm00001d023330	3.73031	8.02e-09	2.38e-07
Zm00001d021936	2.46199	8.18e-09	2.43e-07
Zm00001d014199	8.42459	8.64e-09	2.56e-07
Zm00001d052962	3.32739	8.71e-09	2.58e-07
Zm00001d041608	2.35207	9.09e-09	2.69e-07
Zm00001d052243	6.31044	9.18e-09	2.71e-07
Zm00001d006875	-3.49306	9.25e-09	2.72e-07
Zm00001d016274	-2.38079	9.3e-09	2.74e-07
Zm00001d016616	3.65096	9.47e-09	2.78e-07
Zm00001d038387	-3.98708	9.47e-09	2.78e-07
Zm00001d025864	5.08945	9.61e-09	2.82e-07
Zm00001d037757	-2.58194	9.89e-09	2.9e-07
Zm00001d032103	3.6465	9.95e-09	2.91e-07
Zm00001d027481	-2.54263	1.02e-08	2.99e-07
Zm00001d043200	2.98159	1.03e-08	3.01e-07
Zm00001d047671	-3.80943	1.03e-08	3.01e-07
Zm00001d005749	5.74308	1.04e-08	3.05e-07
Zm00001d015884	5.80372	1.05e-08	3.06e-07
Zm00001d036602	2.29702	1.08e-08	3.15e-07
Zm00001d017966	2.36634	1.09e-08	3.18e-07
Zm00001d003830	3.23062	1.11e-08	3.23e-07
Zm00001d004079	2.24948	1.12e-08	3.24e-07
Zm00001d011013	2.38038	1.12e-08	3.25e-07
Zm00001d006795	3.6595	1.13e-08	3.26e-07
Zm00001d005973	2.40804	1.16e-08	3.36e-07
Zm00001d020592	8.36708	1.17e-08	3.38e-07
Zm00001d013333	5.37254	1.2e-08	3.45e-07
Zm00001d019100	-3.15406	1.22e-08	3.51e-07
Zm00001d034678	5.73073	1.24e-08	3.55e-07
Zm00001d034494	3.3264	1.3e-08	3.74e-07
Zm00001d053150	-2.27298	1.31e-08	3.76e-07
Zm00001d038651	-3.34944	1.33e-08	3.81e-07
Zm00001d047644	8.42428	1.35e-08	3.87e-07
Zm00001d049727	2.38655	1.36e-08	3.88e-07
Zm00001d005951	-3.09285	1.37e-08	3.92e-07
Zm00001d043571	-2.27709	1.4e-08	3.99e-07
Zm00001d021296	3.08613	1.41e-08	4.02e-07
Zm00001d010617	5.83608	1.43e-08	4.06e-07
Zm00001d043837	8.31438	1.44e-08	4.1e-07
Zm00001d006825	4.79434	1.53e-08	4.34e-07
Zm00001d045919	-2.50941	1.58e-08	4.47e-07
Zm00001d007708	3.23752	1.78711e-08	4.54843e-07
Zm00001d016009	3.82386	1.62e-08	4.6e-07
Zm00001d049219	5.18153	1.65e-08	4.67e-07
Zm00001d018090	3.17817	1.69e-08	4.78e-07
Zm00001d006293	-2.70224	1.73e-08	4.9e-07
Zm00001d040527	-3.71942	1.74e-08	4.92e-07
Zm00001d037061	3.65867	1.76e-08	4.95e-07
Zm00001d034564	-2.70404	1.79e-08	5.04e-07
Zm00001d029356	7.96124	1.81e-08	5.1e-07
Zm00001d019283	2.45959	1.82e-08	5.11e-07
Zm00001d022229	-2.94821	1.83e-08	5.14e-07
Zm00001d012407	2.87265	1.86e-08	5.21e-07
Zm00001d028680	3.75771	1.87e-08	5.23e-07
Zm00001d017913	-2.7325	1.87e-08	5.24e-07
Zm00001d042624,Zm00001d042625	3.24665	1.89e-08	5.27e-07
Zm00001d007764	3.68198	1.89e-08	5.28e-07
Zm00001d048372	2.27105	1.93e-08	5.38e-07
Zm00001d037453	2.8401	1.94e-08	5.4e-07
Zm00001d002402	-2.21458	1.95e-08	5.42e-07
Zm00001d022026	6.13328	1.95e-08	5.43e-07
Zm00001d052253	2.74502	2.07e-08	5.75e-07
Zm00001d009328	4.79342	2.07e-08	5.75e-07
Zm00001d021930	2.68313	2.11e-08	5.86e-07
Zm00001d002351	-3.13201	2.18e-08	6.04e-07
Zm00001d046981	2.74037	2.19e-08	6.05e-07
Zm00001d020953	8.3494	2.2e-08	6.09e-07
Zm00001d013817	3.56299	2.26e-08	6.24e-07
Zm00001d020692	2.75858	2.29e-08	6.32e-07
Zm00001d002992	-2.35467	2.29e-08	6.32e-07
Zm00001d049277	6.07352	2.34e-08	6.45e-07
Zm00001d033054	2.35045	2.39e-08	6.57e-07
Zm00001d009106	2.92424	2.74e-08	7.53e-07
Zm00001d013782	3.71894	2.76e-08	7.58e-07
Zm00001d022607	3.53429	2.85e-08	7.83e-07
Zm00001d037894	8.36992	2.87e-08	7.86e-07
Zm00001d050899	2.62703	2.91e-08	7.97e-07
Zm00001d009187	2.38	2.92e-08	7.98e-07
Zm00001d011228	3.7999	2.93e-08	8e-07
Zm00001d035395	4.62411	2.97e-08	8.11e-07
Zm00001d004903	-2.6631	3.02e-08	8.23e-07
Zm00001d024204	2.21914	3.05e-08	8.3e-07
Zm00001d020631	3.80565	3.07e-08	8.34e-07
Zm00001d038467	6.59617	3.11e-08	8.44e-07
Zm00001d053997	2.71394	3.11e-08	8.44e-07
Zm00001d032045	3.21658	3.12e-08	8.45e-07
Zm00001d007015	5.3225	3.14e-08	8.51e-07
Zm00001d014166	4.90544	3.15e-08	8.52e-07
Zm00001d040504	-3.50856	3.16e-08	8.54e-07
Zm00001d031813	3.51744	3.2e-08	8.64e-07
Zm00001d003505	3.45291	3.21e-08	8.67e-07
Zm00001d019312	2.5991	3.23e-08	8.71e-07
Zm00001d037935	5.26004	3.26e-08	8.77e-07
Zm00001d025035	2.16721	3.31e-08	8.91e-07
Zm00001d016900	5.63792	3.32e-08	8.91e-07
Zm00001d050265	2.32238	3.51e-08	9.41e-07
Zm00001d040373	8.2065	3.58e-08	9.58e-07
Zm00001d003861	2.31253	3.59e-08	9.62e-07
Zm00001d005424	2.25191	3.63e-08	9.72e-07
Zm00001d037852	2.36394	3.68e-08	9.83e-07
Zm00001d029251	-2.22769	3.69e-08	9.86e-07
Zm00001d028389	-2.41089	3.75e-08	9.99e-07
Zm00001d021492	3.68267	3.87e-08	1.03e-06
Zm00001d037342	-3.93958	3.87e-08	1.03e-06
Zm00001d012590	2.31417	3.88e-08	1.03e-06
Zm00001d017502	-2.39975	3.88e-08	1.03e-06
Zm00001d004086	2.32348	3.93e-08	1.04e-06
Zm00001d031023	3.88654	3.94e-08	1.04e-06
Zm00001d033395	8.8376	3.96e-08	1.05e-06
Zm00001d010670	3.7271	4.03e-08	1.07e-06
Zm00001d002901	5.50221	4.08e-08	1.08e-06
Zm00001d047998	-3.25339	4.14e-08	1.09e-06
Zm00001d028988	6.09813	4.15e-08	1.09e-06
Zm00001d013097	4.22791	4.2e-08	1.11e-06
Zm00001d010634	-2.24958	4.22e-08	1.11e-06
Zm00001d031407	2.28641	4.26e-08	1.12e-06
Zm00001d052185	2.26898	4.27e-08	1.12e-06
Zm00001d043025	2.87779	4.25e-08	1.12e-06
Zm00001d036263	2.73455	4.25e-08	1.12e-06
Zm00001d026291	2.4025	4.39e-08	1.15e-06
Zm00001d002128	3.91507	4.43e-08	1.16e-06
Zm00001d007345	-2.36943	4.72e-08	1.23e-06
Zm00001d019256	2.26987	4.74e-08	1.24e-06
Zm00001d044285	3.10544	4.93e-08	1.29e-06
Zm00001d042731	2.18636	5.06e-08	1.32e-06
Zm00001d050430	2.3555	5.06e-08	1.32e-06
Zm00001d009728	8.13116	5.17e-08	1.35e-06
Zm00001d039574	6.30169	5.36e-08	1.39e-06
Zm00001d029087	2.58658	5.4e-08	1.4e-06
Zm00001d008795	4.90784	5.56e-08	1.44e-06
Zm00001d034501	2.45121	5.63e-08	1.46e-06
Zm00001d046852	5.72884	5.72e-08	1.48e-06
Zm00001d052927	4.37364	5.71e-08	1.48e-06
Zm00001d001694	5.76764	6.38913e-08	1.48754e-06
Zm00001d052224	2.9915	5.77e-08	1.49e-06
Zm00001d029028	2.59871	5.77e-08	1.49e-06
Zm00001d017666	3.2952	5.84e-08	1.51e-06
Zm00001d005866	2.20178	5.88e-08	1.51e-06
Zm00001d020350	5.21419	6.03e-08	1.55e-06
Zm00001d008287	2.18521	6.08e-08	1.56e-06
Zm00001d039416	2.50974	6.26e-08	1.61e-06
Zm00001d002864	2.26612	6.28e-08	1.61e-06
Zm00001d002177	3.4155	6.29e-08	1.61e-06
Zm00001d039049	-4.43319	6.69e-08	1.71e-06
Zm00001d046743	2.33399	6.71e-08	1.72e-06
Zm00001d013907	4.41941	6.79e-08	1.74e-06
Zm00001d040048	5.006	6.88e-08	1.75e-06
Zm00001d020017	2.82936	6.86e-08	1.75e-06
Zm00001d038023	2.64832	6.94e-08	1.76e-06
Zm00001d011133	2.9242	6.93e-08	1.76e-06
Zm00001d028510	-4.11336	6.93e-08	1.76e-06
Zm00001d054044	2.41189	6.96e-08	1.77e-06
Zm00001d046152	6.07854	7.02e-08	1.78e-06
Zm00001d053236	4.37838	7.11e-08	1.8e-06
Zm00001d053639	4.35464	7.19e-08	1.82e-06
Zm00001d034072	2.29602	7.25e-08	1.83e-06
Zm00001d010406	6.29937	7.33e-08	1.85e-06
Zm00001d006297	4.30813	7.51e-08	1.9e-06
Zm00001d031751	6.3363	7.6e-08	1.92e-06
Zm00001d011154	-2.24399	7.68e-08	1.93e-06
Zm00001d020961	2.64546	8.04e-08	2.02e-06
Zm00001d003306	-2.29187	8.04e-08	2.02e-06
Zm00001d010791	-2.63753	8.13e-08	2.04e-06
Zm00001d011527	3.80666	8.11e-08	2.04e-06
Zm00001d046812,Zm00001d046813	2.27898	8.48e-08	2.12e-06
Zm00001d002372	3.23871	8.45e-08	2.12e-06
Zm00001d048440	5.56386	8.48e-08	2.12e-06
Zm00001d012686	-2.32475	8.52e-08	2.13e-06
Zm00001d052457	2.21859	8.53e-08	2.13e-06
Zm00001d042750	3.42995	8.86e-08	2.21e-06
Zm00001d024412	4.46264	8.9e-08	2.22e-06
Zm00001d008305	-2.66562	9e-08	2.24e-06
Zm00001d053695	3.65461	9.27e-08	2.3e-06
Zm00001d002540	2.27007	9.48e-08	2.35e-06
Zm00001d021177	-2.16478	9.65e-08	2.4e-06
Zm00001d012769	8.23011	9.92e-08	2.46e-06
Zm00001d036750	-2.33251	1e-07	2.48e-06
Zm00001d027976	2.40103	1.01e-07	2.49e-06
Zm00001d003817	-2.29085	1e-07	2.49e-06
Zm00001d015798	2.18576	1.01e-07	2.49e-06
Zm00001d002342	4.76223	1.02e-07	2.51e-06
Zm00001d016087	3.87354	1.03e-07	2.53e-06
Zm00001d053727	-2.68902	1.04e-07	2.56e-06
Zm00001d028711	2.60061	1.06e-07	2.6e-06
Zm00001d040818	-3.0599	1.05e-07	2.6e-06
Zm00001d017782	-2.15973	1.07e-07	2.62e-06
Zm00001d043393	6.0121	1.07e-07	2.63e-06
Zm00001d009409	-2.13154	1.08e-07	2.65e-06
Zm00001d028454	3.17998	1.09e-07	2.67e-06
Zm00001d020260	8.05612	1.1e-07	2.68e-06
Zm00001d021841	-2.19469	1.09e-07	2.68e-06
Zm00001d000825	8.28574	1.22636e-07	2.69223e-06
Zm00001d032582	2.54818	1.12e-07	2.74e-06
Zm00001d044290	-2.29864	1.14e-07	2.77e-06
Zm00001d027727	2.25545	1.19e-07	2.9e-06
Zm00001d040667	2.07242	1.21e-07	2.95e-06
Zm00001d040656	-2.39641	1.23e-07	2.98e-06
Zm00001d052725	3.35866	1.25e-07	3.03e-06
Zm00001d002753	8.06889	1.27e-07	3.09e-06
Zm00001d004366	4.25794	1.28e-07	3.1e-06
Zm00001d051511	2.42708	1.29e-07	3.13e-06
Zm00001d000428	2.07499	1.29e-07	3.13e-06
Zm00001d024211	8.91068	1.32e-07	3.19e-06
Zm00001d032825	2.96957	1.32e-07	3.2e-06
Zm00001d005083	-4.23043	1.35e-07	3.25e-06
Zm00001d008250	3.05043	1.36e-07	3.28e-06
Zm00001d023625	8.01638	1.37e-07	3.31e-06
Zm00001d034022	-2.09207	1.41e-07	3.38e-06
Zm00001d020100	5.8095	1.4e-07	3.38e-06
Zm00001d013797	2.39737	1.42e-07	3.41e-06
Zm00001d033906	2.2248	1.42e-07	3.42e-06
Zm00001d003021	2.20406	1.45e-07	3.47e-06
Zm00001d051389	4.94384	1.46e-07	3.5e-06
Zm00001d018203	7.96704	1.52e-07	3.63e-06
Zm00001d011778	6.46948	1.54e-07	3.68e-06
Zm00001d009468	4.93338	1.56e-07	3.72e-06
Zm00001d006715	3.69527	1.6e-07	3.83e-06
Zm00001d027332	-2.23116	1.66e-07	3.96e-06
Zm00001d050340	-2.36341	1.66e-07	3.96e-06
Zm00001d021727	4.28053	1.7e-07	4.03e-06
Zm00001d019505	2.25893	1.7e-07	4.04e-06
Zm00001d003048	3.54821	1.71e-07	4.06e-06
Zm00001d049870	-4.59301	1.72e-07	4.07e-06
Zm00001d035854	-2.73441	1.72e-07	4.07e-06
Zm00001d002085	2.08568	1.74e-07	4.11e-06
Zm00001d006646	5.89284	1.74e-07	4.11e-06
Zm00001d022512	-2.17999	1.75e-07	4.14e-06
Zm00001d007202	2.87906	1.76e-07	4.16e-06
Zm00001d025333	4.32327	1.78e-07	4.19e-06
Zm00001d052525	2.13971	1.79e-07	4.23e-06
Zm00001d004524	4.26212	1.83e-07	4.32e-06
Zm00001d042887	3.69085	1.86e-07	4.38e-06
Zm00001d050514	3.70465	1.87e-07	4.39e-06
Zm00001d008073	4.13137	2.19946e-07	4.55482e-06
Zm00001d042095	3.33557	1.94e-07	4.57e-06
Zm00001d017282	2.53252	1.96e-07	4.59e-06
Zm00001d032857	3.30594	1.96e-07	4.6e-06
Zm00001d018965	4.31017	2.24924e-07	4.63991e-06
Zm00001d048533	2.54419	2e-07	4.69e-06
Zm00001d026354	2.87874	2.02e-07	4.72e-06
Zm00001d004545	3.02281	2.30191e-07	4.74488e-06
Zm00001d012674	2.15218	2.05e-07	4.79e-06
Zm00001d003019	2.27612	2.06e-07	4.81e-06
Zm00001d032265	3.5733	2.06e-07	4.81e-06
Zm00001d045599	3.73838	2.09e-07	4.87e-06
Zm00001d045145	-2.44332	2.1e-07	4.88e-06
Zm00001d022517	3.58242	2.1e-07	4.89e-06
Zm00001d022277	3.89067	2.12e-07	4.93e-06
Zm00001d047358	2.9862	2.12e-07	4.93e-06
Zm00001d045336	2.16483	2.15e-07	4.99e-06
Zm00001d017077	-2.92734	2.18e-07	5.05e-06
Zm00001d044146	3.09101	2.19e-07	5.08e-06
Zm00001d034074	-2.17865	2.2e-07	5.1e-06
Zm00001d004279	-2.42845	2.21e-07	5.11e-06
Zm00001d023615	2.4554	2.23e-07	5.13e-06
Zm00001d021804	5.05315	2.22e-07	5.13e-06
Zm00001d024753	7.88291	2.22e-07	5.13e-06
Zm00001d020138	5.13029	2.22e-07	5.13e-06
Zm00001d042096	2.54718	2.25e-07	5.17e-06
Zm00001d034995	5.50917	2.28e-07	5.24e-06
Zm00001d032301	-2.11602	2.29e-07	5.27e-06
Zm00001d019406	7.92157	2.29e-07	5.27e-06
Zm00001d044045	2.43199	2.32e-07	5.32e-06
Zm00001d039496	4.41105	2.33e-07	5.35e-06
Zm00001d044734	4.29966	2.34e-07	5.37e-06
Zm00001d013080	3.32883	2.37e-07	5.43e-06
Zm00001d002313	-2.11754	2.4e-07	5.48e-06
Zm00001d008800	3.7162	2.41e-07	5.5e-06
Zm00001d025814	3.1975	2.42e-07	5.53e-06
Zm00001d016950	3.92008	2.48e-07	5.65e-06
Zm00001d001398	7.71202	2.80714e-07	5.66375e-06
Zm00001d007915	2.19919	2.52e-07	5.74e-06
Zm00001d039520	8.30309	2.85124e-07	5.74838e-06
Zm00001d008957	-2.74333	2.53e-07	5.75e-06
Zm00001d053828	-2.17577	2.52e-07	5.75e-06
Zm00001d002530	-3.94359	2.56e-07	5.83e-06
Zm00001d045369	5.35123	2.65e-07	6.02e-06
Zm00001d049028	4.5472	2.65e-07	6.03e-06
Zm00001d048138	-4.30116	2.66e-07	6.04e-06
Zm00001d024946	5.70484	2.67e-07	6.05e-06
Zm00001d029246	3.96562	2.67e-07	6.05e-06
Zm00001d020148	2.45496	2.71e-07	6.14e-06
Zm00001d008498	2.18266	2.76e-07	6.23e-06
Zm00001d036357	7.86392	2.79e-07	6.29e-06
Zm00001d050518	2.21665	2.82e-07	6.35e-06
Zm00001d006536	3.78033	2.81e-07	6.35e-06
Zm00001d038576	2.0937	2.82e-07	6.35e-06
Zm00001d023575	4.25403	2.84e-07	6.38e-06
Zm00001d003129	2.13274	2.88e-07	6.48e-06
Zm00001d048066	4.85543	2.9e-07	6.51e-06
Zm00001d052184	-2.09487	2.9e-07	6.51e-06
Zm00001d046625	2.12939	2.9e-07	6.51e-06
Zm00001d020674	2.75719	2.92e-07	6.55e-06
Zm00001d052992	1.99415	2.94e-07	6.58e-06
Zm00001d017650	4.26494	2.95e-07	6.59e-06
Zm00001d026670	2.23756	3e-07	6.71e-06
Zm00001d008875	3.69502	3.02e-07	6.75e-06
Zm00001d002632	2.24987	3.05e-07	6.81e-06
Zm00001d012036	-2.46614	3.11e-07	6.94e-06
Zm00001d019034	2.19781	3.14e-07	6.99e-06
Zm00001d015459	3.07413	3.15e-07	7e-06
Zm00001d010190	2.32436	3.17e-07	7.05e-06
Zm00001d021935	2.0458	3.19e-07	7.09e-06
Zm00001d012629	3.69274	3.64261e-07	7.21838e-06
Zm00001d018461	2.27343	3.37e-07	7.47e-06
Zm00001d042088	2.28266	3.38e-07	7.49e-06
Zm00001d021487	3.45317	3.39e-07	7.51e-06
Zm00001d029091	2.22257	3.49e-07	7.72e-06
Zm00001d036784	-2.92775	3.51e-07	7.77e-06
Zm00001d035501	-2.65272	3.57e-07	7.89e-06
Zm00001d039053	2.22095	3.62e-07	7.98e-06
Zm00001d017418	-2.29822	3.63e-07	8e-06
Zm00001d024943	7.92629	3.63e-07	8e-06
Zm00001d040318	2.17054	3.65e-07	8.05e-06
Zm00001d029040	-2.72209	3.72e-07	8.18e-06
Zm00001d027763	-4.26384	3.72e-07	8.18e-06
Zm00001d020687	2.12606	3.81e-07	8.37e-06
Zm00001d020277	2.46502	3.82e-07	8.38e-06
Zm00001d018730	2.40169	3.83e-07	8.4e-06
Zm00001d051015	2.10579	3.89e-07	8.52e-06
Zm00001d052194	3.77251	3.93e-07	8.61e-06
Zm00001d029723	2.32286	3.95e-07	8.63e-06
Zm00001d035457	4.36346	3.97e-07	8.67e-06
Zm00001d021896	4.26489	3.99e-07	8.71e-06
Zm00001d032358	-2.75179	4.07e-07	8.88e-06
Zm00001d048710	-3.82033	4.09e-07	8.92e-06
Zm00001d008756	3.99604	4.09e-07	8.92e-06
Zm00001d025129	-2.40614	4.11e-07	8.96e-06
Zm00001d031372	2.27124	4.2e-07	9.12e-06
Zm00001d040110	6.16301	4.19e-07	9.12e-06
Zm00001d042107	2.82071	4.3e-07	9.33e-06
Zm00001d051085	2.24067	4.34e-07	9.39e-06
Zm00001d032253	2.17585	4.34e-07	9.39e-06
Zm00001d017767	-2.11708	4.33e-07	9.39e-06
Zm00001d039367	7.81424	4.34e-07	9.4e-06
Zm00001d051693	2.66177	4.38e-07	9.46e-06
Zm00001d029596	7.79881	4.45e-07	9.62e-06
Zm00001d020703	3.901	4.49e-07	9.69e-06
Zm00001d016013	3.26703	4.49e-07	9.69e-06
Zm00001d003544	4.36238	4.51e-07	9.71e-06
Zm00001d020549	2.33573	4.64e-07	9.99e-06
Zm00001d020266	5.82086	4.71e-07	1.01e-05
Zm00001d018342	2.20437	4.72e-07	1.02e-05
Zm00001d014181	2.72292	4.77e-07	1.02e-05
Zm00001d025834	-2.2766	4.85e-07	1.04e-05
Zm00001d017482	-1.97609	4.9e-07	1.05e-05
Zm00001d018700	3.14244	5.1e-07	1.09e-05
Zm00001d032868	7.75712	5.13e-07	1.1e-05
Zm00001d047495	-4.1417	5.21e-07	1.11e-05
Zm00001d019507	-2.22423	5.26e-07	1.12e-05
Zm00001d047325	3.54834	5.25e-07	1.12e-05
Zm00001d028120	6.04481	5.22e-07	1.12e-05
Zm00001d035629	-2.0257	5.37e-07	1.14e-05
Zm00001d004072	3.26655	5.34e-07	1.14e-05
Zm00001d012257	2.72104	5.35e-07	1.14e-05
Zm00001d006329	2.09365	5.42e-07	1.15e-05
Zm00001d015401	2.23934	5.39e-07	1.15e-05
Zm00001d043178	2.27228	5.48e-07	1.16e-05
Zm00001d015012	2.19417	5.52e-07	1.17e-05
Zm00001d037155	5.58785	5.67e-07	1.2e-05
Zm00001d020557	-2.70219	5.64e-07	1.2e-05
Zm00001d002198	-2.06622	5.68e-07	1.2e-05
Zm00001d012255	2.95117	5.67e-07	1.2e-05
Zm00001d002316	2.19965	5.71e-07	1.21e-05
Zm00001d017365	4.06085	5.75e-07	1.21e-05
Zm00001d033050	4.17876	5.75e-07	1.21e-05
Zm00001d012780	-3.38974	5.77e-07	1.22e-05
Zm00001d048357	3.71466	5.93e-07	1.25e-05
Zm00001d027530	2.88119	5.94e-07	1.25e-05
Zm00001d046936	1.95504	5.93e-07	1.25e-05
Zm00001d033579	2.32243	6.01e-07	1.26e-05
Zm00001d034425	3.00796	5.97e-07	1.26e-05
Zm00001d018685	3.70622	6.07e-07	1.27e-05
Zm00001d047640	2.51904	6.17e-07	1.29e-05
Zm00001d040517	-1.99799	6.17e-07	1.29e-05
Zm00001d002295	5.36388	6.26e-07	1.31e-05
Zm00001d047350	4.5705	6.29e-07	1.32e-05
Zm00001d025263	1.97715	6.31e-07	1.32e-05
Zm00001d026489	2.58411	6.39e-07	1.34e-05
Zm00001d002482	7.83942	6.41e-07	1.34e-05
Zm00001d008567	2.08068	6.43e-07	1.34e-05
Zm00001d019445	7.91192	6.4e-07	1.34e-05
Zm00001d047000	3.47752	6.49e-07	1.35e-05
Zm00001d036532	2.05274	6.6e-07	1.37e-05
Zm00001d046226	2.82168	6.65e-07	1.38e-05
Zm00001d037651	-2.70738	6.63e-07	1.38e-05
Zm00001d029320	3.78529	6.7e-07	1.39e-05
Zm00001d032653	7.89295	6.74e-07	1.4e-05
Zm00001d007959	2.99362	6.9e-07	1.43e-05
Zm00001d001960	3.01591	6.95e-07	1.44e-05
Zm00001d016942	4.18172	6.97e-07	1.44e-05
Zm00001d005056	7.74683	7.02e-07	1.45e-05
Zm00001d033957	3.29702	7.06e-07	1.46e-05
Zm00001d030213	2.05111	7.13e-07	1.47e-05
Zm00001d047663	3.12137	7.1e-07	1.47e-05
Zm00001d022166	-2.24051	7.19e-07	1.48e-05
Zm00001d008223	4.27045	7.27e-07	1.5e-05
Zm00001d037918	2.30961	7.41e-07	1.53e-05
Zm00001d051014	2.0197	7.42e-07	1.53e-05
Zm00001d027271	-2.07805	7.73e-07	1.59e-05
Zm00001d028363	-2.39998	7.76e-07	1.59e-05
Zm00001d037180	3.58362	7.82e-07	1.61e-05
Zm00001d035925	2.1274	7.84e-07	1.61e-05
Zm00001d054106	1.90658	7.96e-07	1.63e-05
Zm00001d014530	2.26775	7.97e-07	1.63e-05
Zm00001d019057	-2.11999	8.07e-07	1.65e-05
Zm00001d015164	2.80868	8.13e-07	1.66e-05
Zm00001d039400	-2.75173	8.15e-07	1.67e-05
Zm00001d037934	2.33982	8.4e-07	1.71e-05
Zm00001d030174	7.75756	8.45e-07	1.72e-05
Zm00001d050346	-1.98721	8.51e-07	1.73e-05
Zm00001d002451	-2.40392	8.57e-07	1.74e-05
Zm00001d005782	2.98572	8.61e-07	1.75e-05
Zm00001d034257	-2.20518	8.66e-07	1.76e-05
Zm00001d013934	2.60468	8.71e-07	1.77e-05
Zm00001d050840	3.2019	8.71e-07	1.77e-05
Zm00001d037774	-2.33827	8.73e-07	1.77e-05
Zm00001d033858	1.97107	8.7e-07	1.77e-05
Zm00001d034356	2.46503	8.77e-07	1.78e-05
Zm00001d030767	-2.04572	8.92e-07	1.81e-05
Zm00001d000914	4.80446	1.0131e-06	1.8283e-05
Zm00001d020789	4.14893	9.09e-07	1.84e-05
Zm00001d007624	3.38627	9.18e-07	1.85e-05
Zm00001d009373	-5.0217	9.27e-07	1.87e-05
Zm00001d043056	2.06181	9.39e-07	1.89e-05
Zm00001d008595	1.94294	9.47e-07	1.91e-05
Zm00001d046467	2.05288	9.47e-07	1.91e-05
Zm00001d032073	1.96218	9.57e-07	1.93e-05
Zm00001d012973	-2.02724	9.66e-07	1.94e-05
Zm00001d014792	2.09045	9.71e-07	1.95e-05
Zm00001d028903	2.0403	9.75e-07	1.96e-05
Zm00001d021959	5.08441	9.76e-07	1.96e-05
Zm00001d033772	7.67969	9.94e-07	1.99e-05
Zm00001d039276	-2.03502	1e-06	2.01e-05
Zm00001d052261	-2.79971	1.01e-06	2.02e-05
Zm00001d043830	2.60754	1.02e-06	2.04e-05
Zm00001d045232	2.78373	1.03e-06	2.05e-05
Zm00001d012561	2.0743	1.03e-06	2.06e-05
Zm00001d012791	-3.66838	1.03e-06	2.06e-05
Zm00001d006570	3.81398	1.16608e-06	2.07353e-05
Zm00001d006591	3.95978	1.16749e-06	2.07465e-05
Zm00001d044339	-3.20025	1.04e-06	2.08e-05
Zm00001d028653	2.01685	1.06e-06	2.1e-05
Zm00001d052955	5.46664	1.06e-06	2.11e-05
Zm00001d005818	2.03751	1.06e-06	2.11e-05
Zm00001d032230	-2.6331	1.08e-06	2.15e-05
Zm00001d005010	3.322	1.1e-06	2.17e-05
Zm00001d016584	2.31543	1.11e-06	2.2e-05
Zm00001d017648	3.7036	1.11e-06	2.2e-05
Zm00001d004309	-2.51001	1.13e-06	2.24e-05
Zm00001d051692	4.92692	1.15e-06	2.28e-05
Zm00001d038810	2.49492	1.16e-06	2.29e-05
Zm00001d042830	-2.19709	1.19e-06	2.34e-05
Zm00001d038522	1.99374	1.19e-06	2.34e-05
Zm00001d024768	2.29062	1.2e-06	2.38e-05
Zm00001d002304	4.62093	1.21e-06	2.39e-05
Zm00001d008462	2.06489	1.23e-06	2.43e-05
Zm00001d043458	4.15578	1.24e-06	2.44e-05
Zm00001d027550	2.8656	1.24e-06	2.44e-05
Zm00001d027524	2.64231	1.24e-06	2.44e-05
Zm00001d052123	-2.19312	1.24e-06	2.44e-05
Zm00001d010269	1.99931	1.25e-06	2.45e-05
Zm00001d024531	-2.97491	1.24e-06	2.45e-05
Zm00001d048819	-1.96616	1.27e-06	2.49e-05
Zm00001d032855	1.85103	1.3e-06	2.56e-05
Zm00001d033746	-2.12791	1.31e-06	2.57e-05
Zm00001d043663	6.0455	1.31e-06	2.57e-05
Zm00001d034602	2.25193	1.32e-06	2.58e-05
Zm00001d047893	2.02551	1.34e-06	2.62e-05
Zm00001d007830	4.1361	1.35e-06	2.63e-05
Zm00001d020737	2.22024	1.34e-06	2.63e-05
Zm00001d014757	5.14444	1.37e-06	2.67e-05
Zm00001d031430	-2.01822	1.37e-06	2.67e-05
Zm00001d022327	3.18493	1.37e-06	2.67e-05
Zm00001d015007	2.29961	1.39e-06	2.7e-05
Zm00001d044874	3.61237	1.39e-06	2.7e-05
Zm00001d013536	-2.03991	1.39e-06	2.7e-05
Zm00001d036650	2.85416	1.4e-06	2.72e-05
Zm00001d038289	4.73815	1.42e-06	2.75e-05
Zm00001d006753	5.52744	1.43e-06	2.78e-05
Zm00001d053217	1.95936	1.44e-06	2.79e-05
Zm00001d006246	2.04375	1.44e-06	2.79e-05
Zm00001d037854	4.49414	1.47e-06	2.84e-05
Zm00001d011585	-1.90396	1.48e-06	2.86e-05
Zm00001d040310	2.65866	1.48e-06	2.86e-05
Zm00001d021634	-1.86219	1.5e-06	2.89e-05
Zm00001d024853	2.75442	1.53e-06	2.94e-05
Zm00001d049273	3.0381	1.54e-06	2.96e-05
Zm00001d002256	-2.17092	1.55e-06	2.98e-05
Zm00001d016607	4.0533	1.59e-06	3.06e-05
Zm00001d021850	-2.04518	1.6e-06	3.07e-05
Zm00001d052519	-1.97621	1.61e-06	3.08e-05
Zm00001d022593	7.96636	1.61e-06	3.09e-05
Zm00001d020955	2.09919	1.62e-06	3.11e-05
Zm00001d010743	2.3773	1.63e-06	3.12e-05
Zm00001d022258	-2.68902	1.63e-06	3.12e-05
Zm00001d023335	4.32041	1.63e-06	3.12e-05
Zm00001d005174	-2.40029	1.64e-06	3.13e-05
Zm00001d047812	2.05759	1.65e-06	3.16e-05
Zm00001d010579	2.08188	1.66e-06	3.17e-05
Zm00001d042740	2.14529	1.67e-06	3.19e-05
Zm00001d052963	5.63846	1.7e-06	3.24e-05
Zm00001d026258	-2.3318	1.76e-06	3.35e-05
Zm00001d033874	-1.96543	1.76e-06	3.35e-05
Zm00001d038494	2.08316	1.77e-06	3.37e-05
Zm00001d012224	-2.48452	1.78e-06	3.38e-05
Zm00001d027676	1.92658	1.8e-06	3.42e-05
Zm00001d053926	2.72671	1.81e-06	3.44e-05
Zm00001d052060	2.01988	1.83e-06	3.46e-05
Zm00001d012774	-2.22208	1.88e-06	3.55e-05
Zm00001d044475	1.97202	1.88e-06	3.56e-05
Zm00001d048639	2.05315	1.91e-06	3.6e-05
Zm00001d053446	-2.42187	1.9e-06	3.6e-05
Zm00001d045302	-2.21209	1.91e-06	3.61e-05
Zm00001d030614	5.7052	1.92e-06	3.62e-05
Zm00001d039921	2.51549	1.93e-06	3.63e-05
Zm00001d002996	2.93899	2.20773e-06	3.66667e-05
Zm00001d020569	3.46803	1.98e-06	3.73e-05
Zm00001d042529	8.15985	2e-06	3.75e-05
Zm00001d011767	1.93463	1.99e-06	3.75e-05
Zm00001d044254	3.26315	2.02e-06	3.8e-05
Zm00001d041214	-2.66318	2.04e-06	3.84e-05
Zm00001d013796	2.03876	2.04e-06	3.84e-05
Zm00001d039795	5.58489	2.05e-06	3.84e-05
Zm00001d015589	2.70511	2.08e-06	3.89e-05
Zm00001d048516	-2.08612	2.08e-06	3.9e-05
Zm00001d021949	4.5347	2.09e-06	3.92e-05
Zm00001d002350	-1.97626	2.1e-06	3.92e-05
Zm00001d018059	2.5533	2.1e-06	3.93e-05
Zm00001d020250	5.59982	2.12e-06	3.96e-05
Zm00001d019734	5.92643	2.14e-06	3.99e-05
Zm00001d021425	7.52196	2.15e-06	4e-05
Zm00001d020685	-2.08544	2.18e-06	4.06e-05
Zm00001d002312	-1.85988	2.2e-06	4.1e-05
Zm00001d002871	-2.09511	2.2e-06	4.1e-05
Zm00001d028443	1.86963	2.21e-06	4.11e-05
Zm00001d020309	3.1136	2.22e-06	4.13e-05
Zm00001d046184	1.91706	2.25e-06	4.17e-05
Zm00001d017970	4.51286	2.26e-06	4.2e-05
Zm00001d025771	-3.09457	2.28e-06	4.22e-05
Zm00001d025753	5.79427	2.29e-06	4.24e-05
Zm00001d014116	2.04637	2.3e-06	4.26e-05
Zm00001d021160	5.76324	2.32e-06	4.29e-05
Zm00001d048770	2.45116	2.32e-06	4.29e-05
Zm00001d038465	-3.27048	2.35e-06	4.34e-05
Zm00001d046330	4.14252	2.35e-06	4.35e-05
Zm00001d024799	2.69763	2.41e-06	4.44e-05
Zm00001d011577	2.50943	2.45e-06	4.51e-05
Zm00001d038268	2.16244	2.46e-06	4.52e-05
Zm00001d011835	1.99538	2.45e-06	4.52e-05
Zm00001d054017	1.86862	2.46e-06	4.52e-05
Zm00001d020535	3.40254	2.49e-06	4.58e-05
Zm00001d039454	1.92801	2.51e-06	4.6e-05
Zm00001d028391	-3.6162	2.51e-06	4.6e-05
Zm00001d024734	-2.39045	2.53e-06	4.64e-05
Zm00001d008772	-2.26067	2.54e-06	4.65e-05
Zm00001d010822	-1.94279	2.54e-06	4.66e-05
Zm00001d013532	-2.78344	2.57e-06	4.71e-05
Zm00001d011838	2.56381	2.59e-06	4.74e-05
Zm00001d005698	2.43908	2.59e-06	4.74e-05
Zm00001d048703	-2.01574	2.59e-06	4.74e-05
Zm00001d019407	7.64824	2.6e-06	4.75e-05
Zm00001d049173	2.24815	2.61e-06	4.76e-05
Zm00001d024851	8.37146	2.61e-06	4.76e-05
Zm00001d044812	-3.5044	2.69e-06	4.9e-05
Zm00001d032386	1.98972	2.7e-06	4.91e-05
Zm00001d033288	-2.96021	2.71e-06	4.94e-05
Zm00001d009755	7.67073	2.72e-06	4.95e-05
Zm00001d045948	1.90562	2.75e-06	4.99e-05
Zm00001d014456	-1.9219	2.77e-06	5.03e-05
Zm00001d044516	2.01685	2.8e-06	5.08e-05
Zm00001d016415	4.33128	3.20489e-06	5.13727e-05
Zm00001d008816	1.91732	2.86e-06	5.18e-05
Zm00001d036402	3.14915	2.92e-06	5.28e-05
Zm00001d034319	-2.17296	2.93e-06	5.31e-05
Zm00001d000070	-3.40271	2.94e-06	5.31e-05
Zm00001d033543	-2.89738	2.95e-06	5.32e-05
Zm00001d028561	4.91125	2.97e-06	5.37e-05
Zm00001d001019	3.8038	3.3864e-06	5.39417e-05
Zm00001d034641	4.07081	3e-06	5.41e-05
Zm00001d027729	-1.8475	3.03e-06	5.47e-05
Zm00001d028165	4.47994	3.03e-06	5.47e-05
Zm00001d050106	-3.2104	3.06e-06	5.5e-05
Zm00001d053118	7.95654	3.06e-06	5.5e-05
Zm00001d028713	1.93212	3.07e-06	5.51e-05
Zm00001d023320	-2.31757	3.07e-06	5.52e-05
Zm00001d044376	-8.0329	3.1e-06	5.56e-05
Zm00001d000154	3.79228	3.13e-06	5.61e-05
Zm00001d039745	-1.88798	3.14e-06	5.62e-05
Zm00001d029560	-1.98557	3.14e-06	5.62e-05
Zm00001d034635	-2.0913	3.14e-06	5.62e-05
Zm00001d042637	-2.8699	3.13e-06	5.62e-05
Zm00001d049597	2.20597	3.15e-06	5.63e-05
Zm00001d008278	1.87661	3.16e-06	5.65e-05
Zm00001d020793	-2.14137	3.16e-06	5.65e-05
Zm00001d046628	-1.9073	3.2e-06	5.72e-05
Zm00001d037849	3.35774	3.22e-06	5.74e-05
Zm00001d009415	-3.26793	3.27e-06	5.83e-05
Zm00001d043654	4.53109	3.28e-06	5.84e-05
Zm00001d050148	2.19899	3.31e-06	5.89e-05
Zm00001d013113	2.19389	3.32e-06	5.9e-05
Zm00001d023385	3.82662	3.32e-06	5.9e-05
Zm00001d037694	-2.25775	3.32e-06	5.9e-05
Zm00001d026577	3.31901	3.33e-06	5.91e-05
Zm00001d042974	-2.91588	3.34e-06	5.92e-05
Zm00001d019222	-3.61765	3.36e-06	5.96e-05
Zm00001d012325	-2.70567	3.36e-06	5.96e-05
Zm00001d009932	4.22031	3.37e-06	5.97e-05
Zm00001d003501	4.47634	3.39e-06	6e-05
Zm00001d039011	2.56283	3.39e-06	6e-05
Zm00001d004021	-1.90102	3.4e-06	6.01e-05
Zm00001d029408	1.80016	3.42e-06	6.04e-05
Zm00001d051442	-3.4671	3.43e-06	6.05e-05
Zm00001d047814	2.31646	3.45e-06	6.09e-05
Zm00001d035306	4.48094	3.46e-06	6.09e-05
Zm00001d021629	4.40128	3.49e-06	6.15e-05
Zm00001d000920	-4.13299	3.95425e-06	6.21027e-05
Zm00001d040780	2.11674	3.55e-06	6.25e-05
Zm00001d034205	2.63959	3.56e-06	6.27e-05
Zm00001d027434	2.37304	3.58e-06	6.29e-05
Zm00001d039081	2.51189	3.59e-06	6.3e-05
Zm00001d043361	-3.095	3.59e-06	6.31e-05
Zm00001d022618	3.03188	3.6e-06	6.32e-05
Zm00001d043088	1.93633	3.66e-06	6.42e-05
Zm00001d034270	2.321	3.7e-06	6.48e-05
Zm00001d049960	-2.36343	3.7e-06	6.48e-05
Zm00001d011958	1.85811	3.76e-06	6.57e-05
Zm00001d042438	-1.90553	3.76e-06	6.58e-05
Zm00001d051161	3.12421	3.79e-06	6.62e-05
Zm00001d044253	2.10096	3.83e-06	6.69e-05
Zm00001d029468	4.22766	3.83e-06	6.69e-05
Zm00001d017962	1.87368	3.87e-06	6.75e-05
Zm00001d014297	-2.0962	3.92e-06	6.83e-05
Zm00001d007803	2.36333	4e-06	6.97e-05
Zm00001d011580	1.8774	4.03e-06	7.01e-05
Zm00001d000230	-1.76687	4.07e-06	7.07e-05
Zm00001d049127	2.84088	4.07e-06	7.07e-05
Zm00001d017203	-1.90772	4.06e-06	7.07e-05
Zm00001d043199	2.30353	4.1e-06	7.11e-05
Zm00001d033711	3.12037	4.1e-06	7.12e-05
Zm00001d022230	-1.82418	4.24e-06	7.35e-05
Zm00001d021167	2.65172	4.24e-06	7.35e-05
Zm00001d009908	2.20783	4.31e-06	7.47e-05
Zm00001d047209	1.88018	4.37e-06	7.56e-05
Zm00001d028811	3.89372	4.38e-06	7.57e-05
Zm00001d013276	-2.49254	4.45e-06	7.7e-05
Zm00001d015515	1.95251	4.48e-06	7.74e-05
Zm00001d011446	2.16886	4.49e-06	7.74e-05
Zm00001d022059	3.84449	4.56e-06	7.87e-05
Zm00001d011833	-2.01584	4.61e-06	7.95e-05
Zm00001d043860	-2.06011	4.62e-06	7.96e-05
Zm00001d006203	1.87571	4.63e-06	7.97e-05
Zm00001d011434	4.661	4.64e-06	7.98e-05
Zm00001d023720	3.01777	4.66e-06	8.01e-05
Zm00001d026306	1.98935	4.68e-06	8.04e-05
Zm00001d043026	3.78432	4.71e-06	8.08e-05
Zm00001d019461	3.83867	4.75e-06	8.16e-05
Zm00001d009138	7.83756	4.81e-06	8.26e-05
Zm00001d021397	2.09928	4.86e-06	8.33e-05
Zm00001d041734	-2.22364	4.88e-06	8.36e-05
Zm00001d053974	-1.97612	4.95e-06	8.47e-05
Zm00001d044138	-2.44809	4.96e-06	8.48e-05
Zm00001d051418	4.40957	5.01e-06	8.57e-05
Zm00001d042536	2.17656	5.06e-06	8.65e-05
Zm00001d044228	-2.12602	5.09e-06	8.69e-05
Zm00001d014258	2.75581	5.12e-06	8.74e-05
Zm00001d038180	4.17503	5.13e-06	8.75e-05
Zm00001d042801	1.80502	5.2e-06	8.86e-05
Zm00001d038608	-1.78946	5.27e-06	8.97e-05
Zm00001d003857	1.97749	5.38e-06	9.15e-05
Zm00001d049565	3.97298	5.38e-06	9.15e-05
Zm00001d034518	2.77747	5.4e-06	9.19e-05
Zm00001d051397	3.68651	5.42e-06	9.2e-05
Zm00001d003667	2.5671	5.41e-06	9.2e-05
Zm00001d002454	-1.86454	5.43e-06	9.21e-05
Zm00001d006360	2.29243	5.44e-06	9.22e-05
Zm00001d016082	4.10805	5.46e-06	9.25e-05
Zm00001d040697	2.03088	5.47e-06	9.27e-05
Zm00001d047276	-3.37255	5.49e-06	9.29e-05
Zm00001d045261	-1.98863	5.57e-06	9.42e-05
Zm00001d005879	3.90919	5.63e-06	9.52e-05
Zm00001d005250	-2.63554	5.64e-06	9.53e-05
Zm00001d050293	2.3637	5.64e-06	9.53e-05
Zm00001d017461	4.8547	5.68e-06	9.59e-05
Zm00001d027978	7.38012	5.69e-06	9.59e-05
Zm00001d022597	2.9148	5.73e-06	9.66e-05
Zm00001d025379	2.92877	5.75e-06	9.68e-05
Zm00001d033503	3.28887	5.76e-06	9.69e-05
Zm00001d043490	1.80559	5.78e-06	9.72e-05
Zm00001d044156	1.93442	5.88e-06	9.88e-05
Zm00001d048544	1.75554	5.94e-06	9.98e-05
Zm00001d004159	1.83931	5.96e-06	0.000100142
Zm00001d032318	-1.9853	6e-06	0.000100663
Zm00001d042842	-1.95452	6.02e-06	0.0001009
Zm00001d040158	-4.57329	6.06e-06	0.000101592
Zm00001d026297	3.81382	6.08e-06	0.000101795
Zm00001d008488	1.88483	6.1e-06	0.000102129
Zm00001d051460	4.15352	6.14e-06	0.00010265
Zm00001d047207	-1.78765	6.16e-06	0.000102977
Zm00001d021974	1.74931	6.16e-06	0.000102977
Zm00001d009783	1.84735	6.18e-06	0.000103202
Zm00001d053308	1.90154	6.19e-06	0.000103314
Zm00001d017215	-1.89606	6.22e-06	0.000103648
Zm00001d014689	1.98811	6.22e-06	0.000103671
Zm00001d032215	-1.89723	6.23e-06	0.000103711
Zm00001d026197	7.32402	6.26e-06	0.000104207
Zm00001d044923	2.30587	6.28e-06	0.000104499
Zm00001d007477	2.7763	6.3e-06	0.000104655
Zm00001d012103	2.01817	6.33e-06	0.000105102
Zm00001d048651	5.07922	6.35e-06	0.000105346
Zm00001d009404	-1.87191	6.43e-06	0.000106654
Zm00001d012063	7.37658	6.45e-06	0.000106834
Zm00001d042345	-1.8347	6.48e-06	0.00010731
Zm00001d028941	3.18408	6.49e-06	0.000107378
Zm00001d028199	3.79663	6.49e-06	0.000107397
Zm00001d053202	-3.19905	6.58e-06	0.000108672
Zm00001d011183	-2.02911	6.65e-06	0.000109768
Zm00001d006256	2.10059	6.66e-06	0.000109902
Zm00001d007633	2.06515	6.69e-06	0.000110255
Zm00001d000164	-2.00157	6.7e-06	0.000110386
Zm00001d011378	4.79874	6.78e-06	0.000111747
Zm00001d034345	-1.86481	6.79e-06	0.000111837
Zm00001d010838	1.90583	6.81e-06	0.0001121
Zm00001d038485	1.90631	6.82e-06	0.000112169
Zm00001d016130	1.83747	6.84e-06	0.000112328
Zm00001d003023	2.1985	6.85e-06	0.000112419
Zm00001d024691	-2.16969	6.85e-06	0.000112419
Zm00001d009503	-2.49343	6.85e-06	0.000112419
Zm00001d013208	2.10412	7.01e-06	0.000114752
Zm00001d048604	1.73281	7.05e-06	0.00011546
Zm00001d022457	4.51064	7.07e-06	0.000115672
Zm00001d008744	1.87841	7.12e-06	0.000116454
Zm00001d028471	-1.89759	7.13e-06	0.000116539
Zm00001d017525	-1.83106	7.2e-06	0.000117578
Zm00001d025887	1.89285	7.33e-06	0.000119627
Zm00001d024875	2.64284	7.42e-06	0.000121011
Zm00001d033719	-2.11587	7.43e-06	0.000121039
Zm00001d042063	5.42305	7.43e-06	0.00012112
Zm00001d006217	2.41208	7.46e-06	0.000121412
Zm00001d000687	7.14502	8.44509e-06	0.000121672
Zm00001d009814	1.86819	7.49e-06	0.00012183
Zm00001d013317	1.75133	7.57e-06	0.000123165
Zm00001d038562	1.84896	7.62e-06	0.000123849
Zm00001d048601	7.27242	7.66e-06	0.000124408
Zm00001d030858	7.27242	7.67e-06	0.000124443
Zm00001d023707	-1.88686	7.7e-06	0.000124848
Zm00001d039573	7.4411	7.72e-06	0.000125143
Zm00001d034357	2.87485	7.74e-06	0.000125342
Zm00001d013787	1.96962	7.76e-06	0.000125596
Zm00001d032495	-2.18797	7.81e-06	0.000126352
Zm00001d046748	-2.05817	7.86e-06	0.000127177
Zm00001d016441	1.93179	7.93e-06	0.000128206
Zm00001d005164	1.73629	8.01e-06	0.000129414
Zm00001d010244	1.9032	8.02e-06	0.000129546
Zm00001d039933	3.62389	8.08e-06	0.000130438
Zm00001d039913	-2.45866	8.17e-06	0.000131745
Zm00001d004203	2.42968	8.22e-06	0.000132543
Zm00001d038389	1.87094	8.23e-06	0.000132628
Zm00001d042135	2.18728	8.26e-06	0.000132987
Zm00001d023548	5.18733	8.34e-06	0.00013409
Zm00001d002020	2.19814	8.41e-06	0.000134957
Zm00001d045517	1.9195	8.4e-06	0.000134957
Zm00001d037150	-1.94383	8.4e-06	0.000134957
Zm00001d013377	5.15535	8.41e-06	0.000134957
Zm00001d023803	2.84229	8.43e-06	0.000135274
Zm00001d039181	-1.88968	8.46e-06	0.000135557
Zm00001d020134	1.87585	8.48e-06	0.000135853
Zm00001d050798	7.60145	8.59e-06	0.000137586
Zm00001d027757	-1.9755	8.64e-06	0.000138269
Zm00001d048737	-2.13733	8.65e-06	0.000138277
Zm00001d026139	-2.14642	8.69e-06	0.000138871
Zm00001d019149	-2.02119	8.72e-06	0.000139253
Zm00001d033835	3.80339	8.73e-06	0.00013941
Zm00001d052585	7.25867	8.74e-06	0.000139493
Zm00001d002160	-3.62645	8.83e-06	0.000140756
Zm00001d018103	2.47636	8.88e-06	0.000141496
Zm00001d036097	1.82164	9.01e-06	0.000143503
Zm00001d028968	2.99363	9.04e-06	0.000143834
Zm00001d033595	4.55284	9.16e-06	0.000145668
Zm00001d010543	5.25406	9.26e-06	0.000147169
Zm00001d049510	-2.84895	9.27e-06	0.000147307
Zm00001d042049	-1.90571	9.29e-06	0.000147554
Zm00001d045661	-2.8373	9.3e-06	0.000147554
Zm00001d033752	7.36016	9.3e-06	0.000147554
Zm00001d012610	1.97434	9.32e-06	0.000147778
Zm00001d005888	2.54219	9.33e-06	0.000147787
Zm00001d045102	1.86659	9.36e-06	0.000148117
Zm00001d032058	-2.35593	9.43e-06	0.000149218
Zm00001d034130	3.8434	9.48e-06	0.000149845
Zm00001d021401	1.71758	9.59e-06	0.000151558
Zm00001d040733	2.30425	9.6e-06	0.000151609
Zm00001d020429	2.7461	9.62e-06	0.00015181
Zm00001d027975	4.30628	9.64e-06	0.000152023
Zm00001d046827	3.73442	9.71e-06	0.00015302
Zm00001d044857	2.59009	9.71e-06	0.00015302
Zm00001d050393	-1.86351	9.72e-06	0.00015305
Zm00001d021572	2.62357	9.72e-06	0.00015305
Zm00001d043672	5.11555	9.75e-06	0.000153306
Zm00001d028625	-1.69432	9.8e-06	0.000154023
Zm00001d037550	3.35753	9.81e-06	0.000154149
Zm00001d043935	2.21812	9.93e-06	0.000155915
Zm00001d029706	2.36687	1.01e-05	0.000159103
Zm00001d036787	3.9173	1.01e-05	0.000159103
Zm00001d053911	-1.78119	1.02e-05	0.000159704
Zm00001d005624	-1.94906	1.02e-05	0.000160355
Zm00001d015969	-5.45604	1.08e-05	0.000168484
Zm00001d052021	3.46846	1.08e-05	0.000168677
Zm00001d028280	2.68558	1.08e-05	0.000169084
Zm00001d010871	-1.86017	1.09e-05	0.000170683
Zm00001d041383	1.87072	1.09e-05	0.000170708
Zm00001d048802	-1.76269	1.09e-05	0.000170813
Zm00001d033714	2.4445	1.11e-05	0.000173472
Zm00001d018787	-1.86417	1.11e-05	0.000173552
Zm00001d048645	7.17297	1.12e-05	0.000174397
Zm00001d037513	-2.40171	1.12e-05	0.000174685
Zm00001d029031	-2.89402	1.13e-05	0.000175879
Zm00001d053015	-2.17652	1.13e-05	0.000176148
Zm00001d002158	-3.32686	1.14e-05	0.000177024
Zm00001d053702	5.05419	1.15e-05	0.000178835
Zm00001d051399	2.53741	1.16e-05	0.000179933
Zm00001d041258	2.89483	1.16e-05	0.000180232
Zm00001d020543	3.94003	1.17e-05	0.000181762
Zm00001d020185	-2.65421	1.17e-05	0.000181912
Zm00001d052906	5.12167	1.18e-05	0.00018316
Zm00001d014785	1.81741	1.18e-05	0.000183306
Zm00001d015239	-1.78246	1.19e-05	0.000183942
Zm00001d026126	3.70257	1.19e-05	0.000184071
Zm00001d051932	-3.8916	1.2e-05	0.000184923
Zm00001d030683	2.75447	1.2e-05	0.000185993
Zm00001d046961	2.05226	1.2e-05	0.000185993
Zm00001d026383	-1.6576	1.22e-05	0.000188438
Zm00001d008905	-2.71244	1.22e-05	0.000188875
Zm00001d039355	1.92816	1.24e-05	0.000190649
Zm00001d003923	1.9819	1.24e-05	0.000191416
Zm00001d017474	7.57159	1.25e-05	0.000192718
Zm00001d021014	-3.36329	1.25e-05	0.000192719
Zm00001d032517	-2.15679	1.26e-05	0.000193828
Zm00001d002423	-2.00261	1.27e-05	0.000195001
Zm00001d047440	7.68003	1.27e-05	0.000195543
Zm00001d025566	3.859	1.31e-05	0.000200959
Zm00001d033623	1.93898	1.32e-05	0.000202297
Zm00001d050341	-1.77906	1.33e-05	0.00020406
Zm00001d046805	7.19017	1.34e-05	0.000205008
Zm00001d037318	2.34046	1.34e-05	0.00020521
Zm00001d015623	3.76642	1.34e-05	0.000205406
Zm00001d027901	2.28871	1.35e-05	0.000205901
Zm00001d014701	-2.36279	1.56207e-05	0.000207599
Zm00001d021582	1.79054	1.36e-05	0.000207961
Zm00001d024678	3.06357	1.37e-05	0.000208669
Zm00001d014062	1.94788	1.37e-05	0.000209217
Zm00001d025580	3.64711	1.37e-05	0.000209483
Zm00001d042993	1.93675	1.38e-05	0.000209799
Zm00001d038005	7.24454	1.38e-05	0.000209918
Zm00001d026662	1.93272	1.38e-05	0.000210468
Zm00001d010755	-1.9654	1.38e-05	0.000210497
Zm00001d044666	-1.73821	1.39e-05	0.000211038
Zm00001d005654	3.93667	1.39e-05	0.000211038
Zm00001d018883	-3.30236	1.39e-05	0.000211038
Zm00001d018467	-1.85802	1.41e-05	0.000213802
Zm00001d010211	-2.65464	1.41e-05	0.000213945
Zm00001d038623	2.39344	1.41e-05	0.000214513
Zm00001d012459	2.06872	1.42e-05	0.000214846
Zm00001d030993	-2.11961	1.43e-05	0.000216017
Zm00001d004440	-1.9884	1.64065e-05	0.000216853
Zm00001d022374	2.01749	1.45e-05	0.000219292
Zm00001d029583	2.87326	1.45e-05	0.000220003
Zm00001d049742	-2.36963	1.46e-05	0.000220363
Zm00001d010796	1.7197	1.47e-05	0.000221896
Zm00001d033774	7.63521	1.47e-05	0.000222455
Zm00001d044368	3.14531	1.47e-05	0.000222585
Zm00001d017809	1.85109	1.48e-05	0.000222705
Zm00001d018247	-2.31253	1.48e-05	0.00022328
Zm00001d036903	-1.86969	1.5e-05	0.000226502
Zm00001d026154	1.77361	1.51e-05	0.000226935
Zm00001d014244	3.54708	1.51e-05	0.000227542
Zm00001d014055	-2.17817	1.51e-05	0.000227896
Zm00001d016918	1.76992	1.52e-05	0.000228153
Zm00001d038177	3.40664	1.52e-05	0.000228153
Zm00001d049716	2.37719	1.52e-05	0.000228619
Zm00001d022613	-7.13296	1.54e-05	0.000230818
Zm00001d030047	7.47297	1.54e-05	0.0002309
Zm00001d032279	1.78092	1.55e-05	0.000231851
Zm00001d043921	4.22591	1.56e-05	0.000233854
Zm00001d035450	2.04723	1.56e-05	0.000233854
Zm00001d042216	1.92203	1.56e-05	0.000234068
Zm00001d051529	-3.02431	1.57e-05	0.000234266
Zm00001d038412	2.50168	1.57e-05	0.000234356
Zm00001d022144	-2.0016	1.58e-05	0.000235629
Zm00001d040670	1.721	1.6e-05	0.000238458
Zm00001d033024	-2.81852	1.6e-05	0.000238458
Zm00001d044906	2.31331	1.62e-05	0.000241313
Zm00001d000534	-5.33602	1.85373e-05	0.000241665
Zm00001d005538	1.89091	1.62e-05	0.000241974
Zm00001d003045	-3.51804	1.62e-05	0.000241974
Zm00001d004102	-2.08043	1.63e-05	0.000242729
Zm00001d008693	3.63146	1.64e-05	0.000244363
Zm00001d049234	1.84703	1.65e-05	0.000245246
Zm00001d000618	-2.55412	1.89024e-05	0.000245823
Zm00001d013109	3.16268	1.66e-05	0.000246038
Zm00001d040554	2.4822	1.68e-05	0.000249282
Zm00001d025305	1.83916	1.69e-05	0.000251047
Zm00001d038320	7.71757	1.69e-05	0.000251047
Zm00001d033836	1.6446	1.69e-05	0.000251233
Zm00001d049940	1.82546	1.71e-05	0.000253949
Zm00001d049107	3.05445	1.72e-05	0.000254457
Zm00001d049096	3.78086	1.72e-05	0.000254852
Zm00001d029387	-2.59874	1.73e-05	0.000255983
Zm00001d016477	1.87239	1.74e-05	0.000257527
Zm00001d026438	7.15096	1.75e-05	0.000257984
Zm00001d008242	2.30147	1.75e-05	0.00025844
Zm00001d021576	4.47525	1.75e-05	0.000258629
Zm00001d029234	-1.78734	1.76e-05	0.00025967
Zm00001d006078	2.87943	1.77e-05	0.00026098
Zm00001d052630	-1.73136	1.79e-05	0.00026385
Zm00001d051675	1.92399	1.8e-05	0.000265593
Zm00001d020614	-1.92972	1.82e-05	0.000267859
Zm00001d051542	3.4439	1.83e-05	0.000269542
Zm00001d003781	-1.71641	1.84e-05	0.000270877
Zm00001d002650	-1.76938	1.85e-05	0.000272471
Zm00001d021684	3.31154	1.86e-05	0.00027379
Zm00001d010812	2.59095	1.87e-05	0.00027493
Zm00001d034418	3.54095	1.87e-05	0.00027498
Zm00001d007800	2.34289	1.89e-05	0.000277034
Zm00001d034107	2.14715	1.9e-05	0.000278226
Zm00001d020595	-1.75613	1.91e-05	0.000279474
Zm00001d052813	4.53435	1.91e-05	0.000280047
Zm00001d005506	4.15388	1.92e-05	0.000280552
Zm00001d016792	1.76596	1.93e-05	0.000282505
Zm00001d043211	2.97738	1.93e-05	0.00028253
Zm00001d018447	2.46292	1.94e-05	0.000283478
Zm00001d033510	1.91764	1.94e-05	0.000283738
Zm00001d002055	3.95983	1.95e-05	0.000284178
Zm00001d006328	1.6438	1.95e-05	0.000284254
Zm00001d040442	2.63546	1.96e-05	0.000285472
Zm00001d014844	-1.80909	1.96e-05	0.000285472
Zm00001d051761	1.76829	1.96e-05	0.000285472
Zm00001d032385	-1.83918	1.96e-05	0.000285472
Zm00001d040071	7.23111	1.97e-05	0.000286693
Zm00001d014405	2.54476	1.99e-05	0.000288884
Zm00001d024784	-3.17608	1.99e-05	0.000288884
Zm00001d010175	5.73244	1.99e-05	0.000288884
Zm00001d042371	1.76605	2e-05	0.000290069
Zm00001d051478	-2.30715	2.01e-05	0.000291802
Zm00001d002396	-3.02581	2.02e-05	0.000293077
Zm00001d036716	7.14529	2.03e-05	0.000294396
Zm00001d046364	1.74475	2.03e-05	0.000294628
Zm00001d044640	3.69372	2.06e-05	0.000298278
Zm00001d053897	-1.66251	2.07e-05	0.000299473
Zm00001d004655	1.69934	2.07e-05	0.000299582
Zm00001d048683	3.09511	2.07e-05	0.000299706
Zm00001d047908	1.74953	2.08e-05	0.000299967
Zm00001d048866	2.77044	2.08e-05	0.00030003
Zm00001d005114	-1.79245	2.36007e-05	0.000300621
Zm00001d048547	2.12043	2.09e-05	0.000301192
Zm00001d039349	-1.75545	2.09e-05	0.000301272
Zm00001d045557	1.7239	2.1e-05	0.000302503
Zm00001d017212	1.71493	2.11e-05	0.00030388
Zm00001d041692	1.78431	2.11e-05	0.000304373
Zm00001d034763	2.14149	2.13e-05	0.000306304
Zm00001d006010	-1.80808	2.13e-05	0.000306603
Zm00001d011987	-3.91621	2.13e-05	0.000306763
Zm00001d002139	-4.04477	2.15e-05	0.000308871
Zm00001d047399	3.43399	2.16e-05	0.000310068
Zm00001d014013	-2.18233	2.16e-05	0.000310068
Zm00001d005950	-2.00393	2.16e-05	0.000310256
Zm00001d032932	5.54196	2.17e-05	0.00031155
Zm00001d013898	4.9764	2.18e-05	0.00031309
Zm00001d011405	-2.78818	2.19e-05	0.000313664
Zm00001d005881	-2.25128	2.22e-05	0.000317548
Zm00001d033771	5.03652	2.23e-05	0.000319105
Zm00001d045043	1.84559	2.25e-05	0.000321077
Zm00001d024527	1.99507	2.25e-05	0.000321696
Zm00001d048908	1.7458	2.25e-05	0.000321849
Zm00001d028750	3.86706	2.26e-05	0.000322639
Zm00001d040154	1.74372	2.27e-05	0.000322933
Zm00001d043845	2.53404	2.27e-05	0.000322933
Zm00001d033893	-1.65507	2.27e-05	0.000322933
Zm00001d019333	1.73422	2.27e-05	0.000323214
Zm00001d017383	3.17363	2.28e-05	0.000324881
Zm00001d018464	-1.75965	2.3e-05	0.000326694
Zm00001d012197	1.6249	2.3e-05	0.000327209
Zm00001d025752	-2.76523	2.3e-05	0.000327397
Zm00001d043586	3.6895	2.31e-05	0.000327568
Zm00001d035741	2.12604	2.31e-05	0.000327743
Zm00001d002776	3.31726	2.32e-05	0.000328629
Zm00001d017989	3.98549	2.32e-05	0.000328737
Zm00001d036641	2.07946	2.33e-05	0.000329951
Zm00001d008146	3.30538	2.62551e-05	0.000330487
Zm00001d031688	1.849	2.34e-05	0.000331709
Zm00001d014967	-2.41647	2.34e-05	0.000331982
Zm00001d044691	2.00241	2.35e-05	0.000332096
Zm00001d048358	1.87499	2.36e-05	0.00033411
Zm00001d030285	1.80789	2.37e-05	0.000335086
Zm00001d002999	-2.85198	2.4e-05	0.000338573
Zm00001d020550	3.01387	2.41e-05	0.0003397
Zm00001d017287	4.97027	2.41e-05	0.000340011
Zm00001d025170	1.79086	2.41e-05	0.000340158
Zm00001d018238	-2.01537	2.41e-05	0.000340304
Zm00001d002905	-3.05977	2.42e-05	0.000340468
Zm00001d000709	-1.60692	2.72031e-05	0.000340652
Zm00001d024798	2.6244	2.46e-05	0.000346198
Zm00001d045046	-1.81436	2.47e-05	0.000348162
Zm00001d047535	2.67432	2.48e-05	0.000348875
Zm00001d027323	1.72365	2.49e-05	0.000349502
Zm00001d048687	2.27841	2.49e-05	0.000350173
Zm00001d043854	-2.27466	2.49e-05	0.00035021
Zm00001d049186	2.57277	2.5e-05	0.000350793
Zm00001d039131	-1.76448	2.5e-05	0.000351246
Zm00001d017770	-1.90794	2.51e-05	0.000351928
Zm00001d037367	2.2806	2.54e-05	0.000356245
Zm00001d007167	-1.90062	2.54e-05	0.000356258
Zm00001d044540	3.64834	2.56e-05	0.000358638
Zm00001d047837	-1.63775	2.57e-05	0.000358982
Zm00001d002479	7.0155	2.57e-05	0.000359272
Zm00001d028152	-1.95776	2.57e-05	0.000359793
Zm00001d017204	-4.80595	2.6e-05	0.000363075
Zm00001d039531	4.41513	2.6e-05	0.000363075
Zm00001d002290	2.71409	2.61e-05	0.000364523
Zm00001d043547	2.04055	2.61e-05	0.000364523
Zm00001d045026	-2.34791	2.62e-05	0.000365415
Zm00001d023267	1.60552	2.63e-05	0.000366397
Zm00001d012437	1.62567	2.64e-05	0.000367914
Zm00001d047187	1.83004	2.64e-05	0.000367914
Zm00001d017925	1.74233	2.67e-05	0.000370879
Zm00001d047333	7.50989	2.67e-05	0.00037089
Zm00001d034049	-2.02302	2.69e-05	0.000373873
Zm00001d050737	1.71965	2.7e-05	0.000374805
Zm00001d023608	1.71807	2.72e-05	0.000377844
Zm00001d002374	3.45293	3.0698e-05	0.000378956
Zm00001d045644	3.64137	2.74e-05	0.000379667
Zm00001d028771	2.3694	2.74e-05	0.000379667
Zm00001d036901	2.19707	2.75e-05	0.000381207
Zm00001d034433	2.01343	2.76e-05	0.000381997
Zm00001d019091	1.68109	2.76e-05	0.000382547
Zm00001d034197	3.92148	2.77e-05	0.000383287
Zm00001d037429	1.61161	2.77e-05	0.000383287
Zm00001d035028	3.10082	2.78e-05	0.00038365
Zm00001d006159	-1.6587	2.78e-05	0.000384026
Zm00001d013707	-3.37964	2.79e-05	0.000384716
Zm00001d021659	1.79028	2.81e-05	0.000387788
Zm00001d037586	1.68774	2.82e-05	0.000388438
Zm00001d001862	3.18816	2.82e-05	0.000388438
Zm00001d039923	3.72765	2.82e-05	0.000388438
Zm00001d049640	1.73303	2.83e-05	0.000389264
Zm00001d001879	-2.38727	2.84e-05	0.000391057
Zm00001d039267	-1.79323	2.85e-05	0.000391588
Zm00001d018625	-2.35335	2.86e-05	0.000393283
Zm00001d011823	3.24912	2.88e-05	0.000396329
Zm00001d002072	7.01948	2.89e-05	0.000396529
Zm00001d021693	2.78558	2.91e-05	0.000399651
Zm00001d045927	2.13074	2.94e-05	0.000403065
Zm00001d014518	-2.50325	2.95e-05	0.000404164
Zm00001d025228	-1.68148	2.96e-05	0.00040535
Zm00001d022139	1.92353	2.96e-05	0.000406274
Zm00001d002000	-2.01123	2.98e-05	0.000408772
Zm00001d028371	-2.0394	3e-05	0.000411188
Zm00001d026148	-1.71517	3.06e-05	0.000418075
Zm00001d038346	-4.77875	3.07e-05	0.000419385
Zm00001d048785	-2.24378	3.07e-05	0.000419385
Zm00001d029383	2.36704	3.09e-05	0.000422654
Zm00001d039374	2.15889	3.12e-05	0.00042655
Zm00001d036521	-1.68888	3.13e-05	0.000427533
Zm00001d044340	2.23985	3.14e-05	0.000427976
Zm00001d005193	1.70085	3.15e-05	0.000429187
Zm00001d049362	1.68001	3.15e-05	0.000429468
Zm00001d010702	-1.72045	3.17e-05	0.000431723
Zm00001d018485	-2.69949	3.17e-05	0.000431723
Zm00001d002051	1.79323	3.19e-05	0.000433492
Zm00001d027982	-1.65965	3.22e-05	0.000437898
Zm00001d040637	-3.20278	3.23e-05	0.000438902
Zm00001d047242	2.27777	3.23e-05	0.00043943
Zm00001d052390	7.40695	3.24e-05	0.000440594
Zm00001d047989	-2.96506	3.26e-05	0.000442003
Zm00001d044329	3.08086	3.27e-05	0.000443478
Zm00001d042257	-1.76196	3.27e-05	0.000443478
Zm00001d012782	2.79286	3.29e-05	0.000445678
Zm00001d048189	2.69678	3.29e-05	0.000445678
Zm00001d022005	-2.47278	3.29e-05	0.000446089
Zm00001d037910	7.12832	3.3e-05	0.0004466
Zm00001d013795	-1.8133	3.31e-05	0.000448071
Zm00001d048635	1.65691	3.32e-05	0.000448509
Zm00001d004048	-3.21948	3.35e-05	0.000452022
Zm00001d025572	-3.22584	3.35e-05	0.000452595
Zm00001d028616	-2.12627	3.36e-05	0.000453454
Zm00001d049443	-2.26154	3.4e-05	0.000458624
Zm00001d017134	3.38392	3.44e-05	0.000464025
Zm00001d047701	2.76741	3.44e-05	0.000464301
Zm00001d039667	-1.86837	3.47e-05	0.000466966
Zm00001d053394	2.33673	3.49e-05	0.000470559
Zm00001d051814	4.23773	3.5e-05	0.000470641
Zm00001d002984	5.08625	3.52e-05	0.000473887
Zm00001d042851	2.0168	3.53e-05	0.000474741
[truncated: 2,464 more rows]

## Sheet: Mo17-22℃
v4 Gene ID	log2FC	PValue	FDR
Zm00001d023811	9.952	3.98437e-77	1.12666e-72
Zm00001d014134	9.58195	1.25951e-76	1.79304e-72
Zm00001d036539	9.82375	5.62648e-73	7.955e-69
Zm00001d030548	8.58629	1.8864e-69	1.77805e-65
Zm00001d018738	9.30596	1.41527e-65	1.00049e-61
Zm00001d043988	7.9692	3.24564e-63	1.83554e-59
Zm00001d042633	9.15581	3.81057e-61	1.79586e-57
Zm00001d050455	8.75324	1.1341e-60	4.58128e-57
Zm00001d042749	8.58156	3.93048e-60	1.38928e-56
Zm00001d043121	8.31027	6.33724e-60	1.99109e-56
Zm00001d032691	8.22065	9.38203e-59	2.65296e-55
Zm00001d014945	9.60744	1.08942e-58	2.8005e-55
Zm00001d012024	9.67252	5.83851e-58	1.3758e-54
Zm00001d011886	7.66583	1.37531e-57	2.99151e-54
Zm00001d048949	7.60818	3.31311e-57	6.69178e-54
Zm00001d020984	8.00612	3.67297e-57	6.92405e-54
Zm00001d039963	7.47993	4.94599e-56	8.74111e-53
Zm00001d042140	8.25796	1.1585e-55	1.927e-52
Zm00001d045210	7.6942	1.5528e-55	2.34731e-52
Zm00001d032368	8.33517	1.57721e-55	2.34731e-52
Zm00001d033455	6.86231	2.30066e-55	3.19447e-52
Zm00001d024960	8.18677	2.37238e-55	3.19447e-52
Zm00001d023843	7.30238	2.84079e-55	3.65132e-52
Zm00001d029397	7.39536	1.25481e-54	1.5427e-51
Zm00001d031158	7.43891	3.69562e-54	4.35421e-51
Zm00001d000298	8.19314	1.46511e-53	1.65716e-50
Zm00001d031257	7.36778	1.83315e-53	1.99369e-50
Zm00001d052744	8.2698	2.07928e-53	2.17763e-50
Zm00001d031221	7.24732	2.70806e-53	2.73485e-50
Zm00001d042244	8.5787	3.76029e-53	3.66654e-50
Zm00001d044157	7.60505	4.2299e-53	3.76355e-50
Zm00001d045843	7.40783	5.0437e-53	4.75403e-50
Zm00001d014121	9.06149	2.61756e-52	2.38764e-49
Zm00001d053001	9.60055	4.3476e-52	3.84179e-49
Zm00001d037749	8.31444	7.65113e-52	6.55609e-49
Zm00001d043665	7.36353	1.03829e-51	8.63519e-49
Zm00001d041082	8.01305	1.26675e-51	1.02343e-48
Zm00001d021688	7.55082	1.44118e-51	1.132e-48
Zm00001d032618	6.76677	1.6016e-51	1.22401e-48
Zm00001d043344	9.28655	2.95639e-51	2.19994e-48
Zm00001d042099	7.2434	4.35818e-51	3.1599e-48
Zm00001d017381	7.53745	5.41561e-51	3.82843e-48
Zm00001d044308	8.49791	6.37633e-51	4.39765e-48
Zm00001d046342	7.57724	1.7357e-50	1.16858e-47
Zm00001d024996	8.18719	3.36842e-50	2.21509e-47
Zm00001d050259	6.80054	4.30065e-50	2.76385e-47
Zm00001d035162	7.34071	5.25432e-50	3.3017e-47
Zm00001d001943	7.44828	7.41496e-50	4.55811e-47
Zm00001d033517	6.97101	9.0682e-50	5.45578e-47
Zm00001d025437	6.95277	2.64474e-49	1.55803e-46
Zm00001d043947	8.76414	2.85702e-49	1.64873e-46
Zm00001d048644	7.72702	2.92939e-49	1.65669e-46
Zm00001d034096	9.43098	4.42063e-49	2.45102e-46
Zm00001d029648	8.38099	5.25217e-49	2.85607e-46
Zm00001d007363	9.74675	8.48755e-49	4.52835e-46
Zm00001d028816	7.31846	1.77724e-48	9.3065e-46
Zm00001d048950	7.33299	1.05614e-47	5.42991e-45
Zm00001d045211	10.6364	1.97635e-47	9.97953e-45
Zm00001d048087	10.8837	4.14916e-47	2.05835e-44
Zm00001d019758	8.94517	8.69328e-47	4.23827e-44
Zm00001d032608	6.71556	1.05919e-46	5.07641e-44
Zm00001d045884	9.1615	1.52976e-46	7.20952e-44
Zm00001d004238	8.74397	2.33633e-46	1.08302e-43
Zm00001d043544	6.11284	2.40328e-46	1.09609e-43
Zm00001d027946	7.51658	7.90257e-46	3.547e-43
Zm00001d035246	6.51667	3.2394e-45	1.43126e-42
Zm00001d023774	9.04141	7.78045e-45	3.38474e-42
Zm00001d003190	8.7073	9.55164e-45	4.0923e-42
Zm00001d002434	7.1481	1.3872e-44	5.85462e-42
Zm00001d047192	9.14662	1.66394e-44	6.91928e-42
Zm00001d011315	7.73989	1.84431e-44	7.5582e-42
Zm00001d021647	7.70494	4.88443e-44	1.9731e-41
Zm00001d040705	7.15302	7.25849e-44	2.89082e-41
Zm00001d030558	8.91388	8.81781e-44	3.43919e-41
Zm00001d027557	6.04973	9.82851e-44	3.86001e-41
Zm00001d040245	8.08758	3.27233e-43	1.26756e-40
Zm00001d021638	7.1811	4.37762e-43	1.67278e-40
Zm00001d005766	6.09706	5.69042e-43	2.14544e-40
Zm00001d034095	8.75858	6.35953e-43	2.36616e-40
Zm00001d040787	6.53784	7.64169e-43	2.80629e-40
Zm00001d018701	9.1879	9.82395e-43	3.56143e-40
Zm00001d040326	6.26756	1.27828e-42	4.57543e-40
Zm00001d018727	7.49502	1.83208e-42	6.47573e-40
Zm00001d017121	6.75365	2.07672e-42	7.2498e-40
Zm00001d021695	6.26001	2.94145e-42	1.01433e-39
Zm00001d052989	7.07457	3.19645e-42	1.08899e-39
Zm00001d017425	6.94733	5.25598e-42	1.76933e-39
Zm00001d002707	7.05034	1.06074e-41	3.52877e-39
Zm00001d031449	6.4527	1.42514e-41	4.68589e-39
Zm00001d043622	9.54799	4.2126e-41	1.36919e-38
Zm00001d015091	5.77427	1.01787e-40	3.27073e-38
Zm00001d042553	5.71279	1.04714e-40	3.32698e-38
Zm00001d033241	6.55098	1.4314e-40	4.49728e-38
Zm00001d018734	5.82633	1.91551e-40	5.95217e-38
Zm00001d019078	5.90784	8.15996e-40	2.50803e-37
Zm00001d000502	5.6299	1.4517e-39	4.0129e-37
Zm00001d025200	10.7439	1.95357e-39	5.9399e-37
Zm00001d014060	6.30919	2.38408e-39	7.17176e-37
Zm00001d044181	7.85884	2.82194e-39	8.39958e-37
Zm00001d019457	6.85458	2.88507e-39	8.49803e-37
Zm00001d028815	6.23346	3.64263e-39	1.06188e-36
Zm00001d022437	6.73839	5.77701e-39	1.6669e-36
Zm00001d029744	5.79762	7.26406e-39	2.07481e-36
Zm00001d042104	6.6188	1.16271e-38	3.28779e-36
Zm00001d015616	5.78161	1.25241e-38	3.50637e-36
Zm00001d014001	8.85824	1.38056e-38	3.82726e-36
Zm00001d028814	6.86426	1.4469e-38	3.97223e-36
Zm00001d036550	5.61133	1.72382e-38	4.68696e-36
Zm00001d040101	5.61591	1.7769e-38	4.78529e-36
Zm00001d024763	5.42142	4.03185e-38	1.07555e-35
Zm00001d004734	5.29526	4.70263e-38	1.24277e-35
Zm00001d040468	5.13269	1.27275e-37	3.33237e-35
Zm00001d044442	6.10431	1.41691e-37	3.67577e-35
Zm00001d012900	5.38142	2.09947e-37	5.39697e-35
Zm00001d023769	10.017	2.26386e-37	5.76714e-35
Zm00001d041838	7.22489	2.79424e-37	7.05471e-35
Zm00001d047436	5.3057	3.09768e-37	7.75161e-35
Zm00001d006351	6.00279	3.61087e-37	8.95655e-35
Zm00001d010284	8.61774	4.25949e-37	1.04735e-34
Zm00001d023768	9.81464	5.06949e-37	1.23578e-34
Zm00001d048913	9.19996	1.40794e-36	3.37393e-34
Zm00001d049028	6.94129	1.46641e-36	3.48452e-34
Zm00001d014748	6.65124	1.57552e-36	3.71259e-34
Zm00001d036927	6.54148	3.09797e-36	7.23978e-34
Zm00001d032458	5.02443	3.87663e-36	8.9852e-34
Zm00001d009296	12.3546	1.08611e-35	2.49691e-33
Zm00001d024207,Zm00001d024210	9.05606	1.47778e-35	3.36993e-33
Zm00001d005460	5.17343	2.37885e-35	5.38134e-33
Zm00001d036370	6.36943	5.03795e-35	1.13062e-32
Zm00001d005823	5.14791	7.61543e-35	1.6956e-32
Zm00001d031189	8.58659	8.28074e-35	1.82933e-32
Zm00001d009084	5.12279	9.54928e-35	2.09322e-32
Zm00001d009999	7.95392	1.07186e-34	2.33146e-32
Zm00001d045360	8.18707	1.5068e-34	3.25249e-32
Zm00001d009939	5.68613	2.70853e-34	5.75859e-32
Zm00001d032643	9.80789	2.69395e-34	5.75859e-32
Zm00001d006117	6.84163	3.08595e-34	6.51203e-32
Zm00001d050302	5.24786	4.3852e-34	9.18521e-32
Zm00001d023779	6.93978	6.39715e-34	1.33009e-31
Zm00001d026426	5.93905	6.84815e-34	1.41347e-31
Zm00001d035166	5.1588	1.38661e-33	2.84124e-31
Zm00001d000294	7.1345	1.84242e-33	3.74806e-31
Zm00001d029847	5.92442	1.88302e-33	3.80329e-31
Zm00001d032374	7.01132	2.56392e-33	5.14184e-31
Zm00001d006535	4.91863	3.01295e-33	5.99981e-31
Zm00001d042022	4.96943	3.17459e-33	6.27747e-31
Zm00001d046801	4.85472	5.39326e-33	1.05906e-30
Zm00001d020702	6.44063	5.47062e-33	1.06685e-30
Zm00001d007773	5.24459	5.85203e-33	1.13341e-30
Zm00001d013617	6.63704	1.02707e-32	1.97568e-30
Zm00001d014649	6.84017	1.23942e-32	2.36804e-30
Zm00001d029359	7.83809	1.4553e-32	2.76186e-30
Zm00001d030542	5.5535	1.81302e-32	3.41778e-30
Zm00001d029794	5.22998	2.396e-32	4.48687e-30
Zm00001d002167	5.29862	2.62939e-32	4.89153e-30
Zm00001d012281	8.09692	2.83638e-32	5.24212e-30
Zm00001d037968	6.35639	2.93964e-32	5.39768e-30
Zm00001d024839	4.99343	3.26323e-32	5.95318e-30
Zm00001d005315	4.66794	8.94816e-32	1.62197e-29
Zm00001d048690	8.02946	4.13242e-31	7.44284e-29
Zm00001d031157	9.23511	4.4716e-31	8.00275e-29
Zm00001d053514	5.81228	4.7136e-31	8.38279e-29
Zm00001d025401	5.00626	7.17786e-31	1.26855e-28
Zm00001d027524	5.18517	1.03804e-30	1.82314e-28
Zm00001d042848	9.7187	1.24155e-30	2.16712e-28
Zm00001d025057	5.44553	1.42384e-30	2.47006e-28
Zm00001d034514	4.65046	1.89634e-30	3.26969e-28
Zm00001d043480	4.63784	2.30838e-30	3.95601e-28
Zm00001d034217	4.70343	4.64106e-30	7.90573e-28
Zm00001d042948	5.16434	7.16224e-30	1.21273e-27
Zm00001d015867	9.70761	9.49739e-30	1.59856e-27
Zm00001d038791	5.26943	1.02852e-29	1.72091e-27
Zm00001d030212	6.68375	1.28574e-29	2.13863e-27
Zm00001d010375	7.57282	2.16818e-29	3.74136e-27
Zm00001d029247	8.23619	2.71659e-29	4.49222e-27
Zm00001d035652	7.39886	3.43203e-29	5.6423e-27
Zm00001d016379	5.12512	3.69551e-29	6.04034e-27
Zm00001d014250	8.32835	5.57131e-29	9.05402e-27
Zm00001d046318	8.18521	9.14374e-29	1.47747e-26
Zm00001d004972	8.77385	1.10209e-28	1.8458e-26
Zm00001d019750	4.59258	1.44626e-28	2.32363e-26
Zm00001d003434	4.76839	1.68883e-28	2.69802e-26
Zm00001d022234	6.15324	2.06771e-28	3.28476e-26
Zm00001d003830	4.37062	2.17757e-28	3.43995e-26
Zm00001d011644	4.42137	2.44921e-28	3.84757e-26
Zm00001d041772	4.48981	3.27252e-28	5.11255e-26
Zm00001d046746	4.66951	4.29515e-28	6.6733e-26
Zm00001d051166	5.64047	5.44252e-28	8.40973e-26
Zm00001d040285	5.4704	8.6266e-28	1.32573e-25
Zm00001d024961	4.42173	1.12497e-27	1.7195e-25
Zm00001d029708	5.72385	1.50443e-27	2.28714e-25
Zm00001d006397	4.35477	1.53848e-27	2.32639e-25
Zm00001d030172	4.46873	1.61454e-27	2.42842e-25
Zm00001d034097	8.76072	2.05231e-27	3.07053e-25
Zm00001d028349	8.1963	2.96006e-27	4.40535e-25
Zm00001d050885	7.81865	3.11123e-27	4.60608e-25
Zm00001d042143	6.78324	5.10768e-27	7.52239e-25
Zm00001d040777	4.23854	5.41604e-27	7.93519e-25
Zm00001d049068	5.10657	5.64278e-27	8.22478e-25
Zm00001d033909	9.49129	8.09173e-27	1.1674e-24
Zm00001d041726	7.83434	1.04664e-26	1.49839e-24
Zm00001d026041	9.29572	1.0492e-26	1.49839e-24
Zm00001d020714	5.67177	1.0781e-26	1.53193e-24
Zm00001d014804	5.25484	1.10684e-26	1.56491e-24
Zm00001d006199	4.12221	1.12168e-26	1.578e-24
Zm00001d017014	6.26375	1.18622e-26	1.66053e-24
Zm00001d003283	7.19246	1.30377e-26	1.81609e-24
Zm00001d028912	7.40813	1.56316e-26	2.16673e-24
Zm00001d054043	4.07382	2.39117e-26	3.2983e-24
Zm00001d002899	7.98585	2.4955e-26	3.42549e-24
Zm00001d038841	7.43191	2.96012e-26	4.04364e-24
Zm00001d049242	5.36884	3.3869e-26	4.6044e-24
Zm00001d021882	4.7737	6.88065e-26	9.30928e-24
Zm00001d012378	4.03786	9.50104e-26	1.27934e-23
Zm00001d000001	5.52275	1.03602e-25	1.38841e-23
Zm00001d047104	4.1088	1.76842e-25	2.35875e-23
Zm00001d050864	5.8793	2.0238e-25	2.68513e-23
Zm00001d008853	7.94805	2.0321e-25	2.68513e-23
Zm00001d032356	6.05599	2.36684e-25	3.11289e-23
Zm00001d013115	5.34245	2.64611e-25	3.46408e-23
Zm00001d032850	5.85524	2.72343e-25	3.54886e-23
Zm00001d011737	9.16384	2.91322e-25	3.77876e-23
Zm00001d040785	7.28195	3.98143e-25	5.14078e-23
Zm00001d025012	6.667	4.0222e-25	5.16981e-23
Zm00001d011641	5.53078	7.40237e-25	9.47135e-23
Zm00001d013004	9.13011	1.16489e-24	1.48377e-22
Zm00001d014993	4.05426	1.69696e-24	2.15179e-22
Zm00001d028199	5.2305	2.23777e-24	2.82489e-22
Zm00001d009938	3.93272	2.31066e-24	2.90393e-22
Zm00001d029829	5.13609	2.40825e-24	3.01319e-22
Zm00001d043870	4.00721	2.55491e-24	3.18261e-22
Zm00001d011157	6.49845	2.6035e-24	3.22891e-22
Zm00001d002974	4.04605	3.25831e-24	4.02337e-22
Zm00001d035646	5.79107	4.31565e-24	5.30581e-22
Zm00001d002755	7.86158	4.80578e-24	5.88281e-22
Zm00001d020780	3.83706	5.64559e-24	6.88105e-22
Zm00001d018220	4.25392	6.68587e-24	8.09655e-22
Zm00001d051525	4.83878	6.70012e-24	8.09655e-22
Zm00001d036256	6.71632	7.21857e-24	8.68593e-22
Zm00001d047952	4.95831	7.40388e-24	8.87116e-22
Zm00001d027948	8.63	7.74599e-24	9.24192e-22
Zm00001d045785	4.15158	1.05219e-23	1.24928e-21
Zm00001d044272	6.18549	1.0559e-23	1.24928e-21
Zm00001d003209	3.97332	1.29878e-23	1.53023e-21
Zm00001d009619	6.23889	1.37605e-23	1.61455e-21
Zm00001d009328	5.75669	1.39301e-23	1.62769e-21
Zm00001d010870	6.76317	1.636e-23	1.90375e-21
Zm00001d013997	4.3201	2.07393e-23	2.39582e-21
Zm00001d006538	6.7912	2.07581e-23	2.39582e-21
Zm00001d041768	9.17134	2.43425e-23	2.7981e-21
Zm00001d027533	3.9558	3.19024e-23	3.65224e-21
Zm00001d028167	5.3617	3.5149e-23	4.00769e-21
Zm00001d008604	3.74996	3.9063e-23	4.43608e-21
Zm00001d041716	4.02411	4.74391e-23	5.36574e-21
Zm00001d011638	4.02165	4.91959e-23	5.54228e-21
Zm00001d017019	4.14876	5.83793e-23	6.55076e-21
Zm00001d020378	4.77131	8.35707e-23	9.34043e-21
Zm00001d017969	6.91206	8.53629e-23	9.50318e-21
Zm00001d048021	4.39847	9.90979e-23	1.0989e-20
Zm00001d008457	4.02465	1.01681e-22	1.12314e-20
Zm00001d040850	3.91263	1.0674e-22	1.17443e-20
Zm00001d030343	6.49511	1.09547e-22	1.20064e-20
Zm00001d032363	4.09965	1.11643e-22	1.21889e-20
Zm00001d050899	3.76533	1.18396e-22	1.28764e-20
Zm00001d000195	5.60667	1.46511e-22	1.58732e-20
Zm00001d006193	-3.79607	1.88789e-22	2.03755e-20
Zm00001d025065	5.00215	2.07081e-22	2.22647e-20
Zm00001d042056	6.09711	2.18361e-22	2.33887e-20
Zm00001d005594	3.88483	2.35836e-22	2.50549e-20
Zm00001d017271	3.64777	2.4769e-22	2.643e-20
Zm00001d003524	4.82656	2.51193e-22	2.67029e-20
Zm00001d006330	4.83493	2.54242e-22	2.69258e-20
Zm00001d004305	5.09491	2.64999e-22	2.79604e-20
Zm00001d014944	4.70679	2.76026e-22	2.90156e-20
Zm00001d047845	6.24028	2.94214e-22	3.08129e-20
Zm00001d042098	7.82971	3.3216e-22	3.46587e-20
Zm00001d031666	4.17764	3.956e-22	4.09757e-20
Zm00001d003365	5.45477	4.68938e-22	4.83948e-20
Zm00001d011228	4.60295	5.82918e-22	5.99388e-20
Zm00001d038930	6.97549	5.92261e-22	6.06788e-20
Zm00001d010171	3.66519	6.26371e-22	6.39418e-20
Zm00001d022334	5.13887	6.74068e-22	6.85634e-20
Zm00001d004906	9.00306	6.96123e-22	7.05529e-20
Zm00001d042934	8.05075	7.26596e-22	7.31173e-20
Zm00001d024962	4.18339	7.24304e-22	7.31173e-20
Zm00001d036364	4.05217	7.9624e-22	7.98415e-20
Zm00001d043512	5.28222	8.46593e-22	8.45905e-20
Zm00001d001960	5.51178	8.75339e-22	8.71548e-20
Zm00001d016166	4.05078	9.26196e-22	9.18949e-20
Zm00001d017152	4.13057	1.01884e-21	1.00734e-19
Zm00001d047638	4.48571	1.31346e-21	1.2941e-19
Zm00001d046945	4.09109	1.43547e-21	1.4094e-19
Zm00001d038064	5.54634	1.47732e-21	1.44548e-19
Zm00001d011080	3.9781	1.58125e-21	1.54183e-19
Zm00001d027423	4.80778	1.74503e-21	1.69567e-19
Zm00001d006526	7.57836	1.97118e-21	1.90887e-19
Zm00001d011269	4.5208	2.2523e-21	2.17366e-19
Zm00001d013098	3.73108	2.34241e-21	2.25293e-19
Zm00001d038023	3.76647	2.74409e-21	2.63033e-19
Zm00001d032069	4.7862	2.75845e-21	2.63516e-19
Zm00001d004731	3.62701	3.0395e-21	2.89387e-19
Zm00001d046745	3.98869	3.13841e-21	2.97801e-19
Zm00001d025924	3.62982	3.1726e-21	3.00039e-19
Zm00001d036401	4.14999	3.24633e-21	3.05988e-19
Zm00001d037215	3.90462	3.73167e-21	3.50567e-19
Zm00001d017008	7.6744	3.78659e-21	3.54548e-19
Zm00001d038325	4.52575	3.85891e-21	3.60127e-19
Zm00001d035046	4.63928	4.35082e-21	4.04698e-19
Zm00001d042950	3.48046	4.38438e-21	4.06482e-19
Zm00001d022277	5.50382	4.42652e-21	4.09048e-19
Zm00001d017991	6.05807	4.45148e-21	4.10015e-19
Zm00001d013572	5.13906	4.617e-21	4.2388e-19
Zm00001d021655	5.76068	4.8e-21	4.39254e-19
Zm00001d034073	3.93674	6.34598e-21	5.78856e-19
Zm00001d041787	6.15551	7.43396e-21	6.75917e-19
Zm00001d046277	3.61305	7.7455e-21	7.01986e-19
Zm00001d052690	6.5614	7.78165e-21	7.03008e-19
Zm00001d016635	4.17639	8.2576e-21	7.43631e-19
Zm00001d014335	9.18989	8.94053e-21	8.02576e-19
Zm00001d040786	6.91154	9.79532e-21	8.73761e-19
Zm00001d006536	4.92334	9.79147e-21	8.73761e-19
Zm00001d025761	4.79655	1.30223e-20	1.15796e-18
Zm00001d025451	6.87789	1.50117e-20	1.33068e-18
Zm00001d042095	6.14578	1.56009e-20	1.37858e-18
Zm00001d006528	3.56691	1.81791e-20	1.6014e-18
Zm00001d042096	3.75257	2.13558e-20	1.8754e-18
Zm00001d043838	4.38677	2.17477e-20	1.9039e-18
Zm00001d028093	3.47177	2.87175e-20	2.50631e-18
Zm00001d021677	6.58451	2.94778e-20	2.56475e-18
Zm00001d014717	5.00106	3.67637e-20	3.18886e-18
Zm00001d036946	6.40124	3.76064e-20	3.25198e-18
Zm00001d024207	11.3792	4.03551e-20	3.62458e-18
Zm00001d033174	3.93045	4.55245e-20	3.92468e-18
Zm00001d012653	3.6503	4.7061e-20	4.04482e-18
Zm00001d018627	3.77405	4.91756e-20	4.21376e-18
Zm00001d024587	3.58491	5.74504e-20	4.90793e-18
Zm00001d017613	3.59332	6.00993e-20	5.11876e-18
Zm00001d044235	4.52878	7.03797e-20	5.97635e-18
Zm00001d032240	6.55894	7.09649e-20	6.00801e-18
Zm00001d016891	3.47565	7.78217e-20	6.56884e-18
Zm00001d046811	6.44938	8.04153e-20	6.76757e-18
Zm00001d053733	5.91053	8.36558e-20	7.01939e-18
Zm00001d046540	5.67535	9.08507e-20	7.60055e-18
Zm00001d014906	3.73256	1.11349e-19	9.28798e-18
Zm00001d016401	5.26429	1.17883e-19	9.80403e-18
Zm00001d002436	4.07966	1.3441e-19	1.11458e-17
Zm00001d039824	4.26297	1.47543e-19	1.2199e-17
Zm00001d004306	7.77526	1.51654e-19	1.25024e-17
Zm00001d039245	3.77912	1.54041e-19	1.26623e-17
Zm00001d008465	3.56059	1.55315e-19	1.273e-17
Zm00001d009106	5.13509	1.61764e-19	1.32202e-17
Zm00001d036668	3.57838	1.88177e-19	1.53346e-17
Zm00001d039103	5.46007	2.41645e-19	1.9635e-17
Zm00001d017912	3.32686	2.81703e-19	2.28244e-17
Zm00001d008449	4.43365	2.8337e-19	2.28939e-17
Zm00001d053268,Zm00001d053269	10.9866	2.91047e-19	2.34471e-17
Zm00001d003048	4.24633	3.19512e-19	2.56672e-17
Zm00001d017276	3.56002	3.31909e-19	2.65875e-17
Zm00001d048560	4.65295	3.48178e-19	2.7812e-17
Zm00001d018431	4.62723	4.38145e-19	3.48998e-17
Zm00001d052767	3.80656	4.43191e-19	3.52026e-17
Zm00001d021497	6.11719	4.52902e-19	3.58731e-17
Zm00001d024665	11.2756	4.92129e-19	3.88713e-17
Zm00001d009945	8.03788	5.40265e-19	4.25545e-17
Zm00001d052245	5.14068	5.80198e-19	4.5573e-17
Zm00001d042909	3.46318	6.20014e-19	4.85655e-17
Zm00001d012627	3.5256	6.28139e-19	4.9066e-17
Zm00001d013751	3.52559	8.94133e-19	6.96512e-17
Zm00001d044947	7.93231	9.10825e-19	7.32571e-17
Zm00001d019283	3.33688	9.73533e-19	7.5456e-17
Zm00001d035080	6.39734	9.73988e-19	7.5456e-17
Zm00001d032858	8.75838	1.0343e-18	7.99092e-17
Zm00001d018090	3.63006	1.07344e-18	8.27076e-17
Zm00001d017849	4.84363	1.11673e-18	8.58093e-17
Zm00001d046330	7.34582	1.12449e-18	8.6171e-17
Zm00001d034356	3.43448	1.16748e-18	8.92239e-17
Zm00001d053424	5.68066	1.19428e-18	9.1026e-17
Zm00001d044777	5.38005	1.47887e-18	1.12414e-16
Zm00001d053695	4.51882	1.50031e-18	1.13738e-16
Zm00001d030555	6.39405	1.55891e-18	1.17865e-16
Zm00001d002178	7.29606	2.21376e-18	1.6693e-16
Zm00001d007379	4.05406	2.31223e-18	1.73891e-16
Zm00001d040244	3.48184	2.35545e-18	1.76672e-16
Zm00001d003091	5.1865	3.05035e-18	2.27585e-16
Zm00001d033320	5.36997	3.15202e-18	2.34552e-16
Zm00001d031155	11.1207	3.30004e-18	2.44281e-16
Zm00001d049381	4.17225	3.29424e-18	2.44281e-16
Zm00001d048131	3.9128	3.42149e-18	2.5261e-16
Zm00001d029628	4.98042	3.45442e-18	2.54376e-16
Zm00001d045336	3.23485	3.67787e-18	2.70128e-16
Zm00001d024852	7.27675	4.03538e-18	2.95618e-16
Zm00001d010616	5.69178	4.15242e-18	3.03406e-16
Zm00001d021935	3.54561	4.25134e-18	3.09833e-16
Zm00001d024210	7.82744	4.23782e-18	3.14217e-16
Zm00001d013830	3.99566	4.34757e-18	3.16032e-16
Zm00001d022868	10.8974	4.58505e-18	3.36457e-16
Zm00001d039535	3.28443	5.25709e-18	3.80191e-16
Zm00001d048861	7.31801	5.25232e-18	3.80191e-16
Zm00001d018064	9.18739	5.33455e-18	3.84809e-16
Zm00001d049330	3.78116	5.40428e-18	3.88847e-16
Zm00001d014351	8.422	5.77056e-18	4.14147e-16
Zm00001d018803	4.1191	6.3125e-18	4.51895e-16
Zm00001d016441	3.9179	6.4467e-18	4.60336e-16
Zm00001d014063	3.97076	6.6532e-18	4.73885e-16
Zm00001d012899	4.17755	6.921e-18	4.91722e-16
Zm00001d046634	10.8207	6.99012e-18	4.95387e-16
Zm00001d013977	7.13798	7.12859e-18	5.03938e-16
Zm00001d006570	4.23227	7.31106e-18	5.19103e-16
Zm00001d007708	4.71478	7.82853e-18	5.53087e-16
Zm00001d010828	6.07307	8.23665e-18	5.79046e-16
Zm00001d043994	10.9934	8.29404e-18	5.84864e-16
Zm00001d015968	3.22028	8.40037e-18	5.90889e-16
Zm00001d052189	10.8474	8.64374e-18	6.06499e-16
Zm00001d040094	4.1681	8.67161e-18	6.06948e-16
Zm00001d017462	5.68786	8.69619e-18	6.07166e-16
Zm00001d003614	5.58711	9.28914e-18	6.46968e-16
Zm00001d040755	7.67566	9.50226e-18	6.60185e-16
Zm00001d003356	4.28801	9.84799e-18	6.82529e-16
Zm00001d004738	7.12907	1.09121e-17	7.54426e-16
Zm00001d005306	3.24686	1.16544e-17	8.03785e-16
Zm00001d038549	4.76338	1.19132e-17	8.19637e-16
Zm00001d010814	4.69638	1.20647e-17	8.2604e-16
Zm00001d020261	7.69536	1.20647e-17	8.2604e-16
Zm00001d050224	3.71803	1.33484e-17	9.1172e-16
Zm00001d045450	3.19093	1.42048e-17	9.67877e-16
Zm00001d002021	3.17489	1.47084e-17	9.9978e-16
Zm00001d036715	4.65015	1.6179e-17	1.09709e-15
Zm00001d037916	4.50571	1.62176e-17	1.09709e-15
Zm00001d027900	4.4589	1.83444e-17	1.23801e-15
Zm00001d013046	3.79274	1.84848e-17	1.24451e-15
Zm00001d002393	8.43319	1.8811e-17	1.26347e-15
Zm00001d046226	3.15384	1.93631e-17	1.29747e-15
Zm00001d013099	10.7908	1.95903e-17	1.30958e-15
Zm00001d024778	3.14513	2.17557e-17	1.45091e-15
Zm00001d017275	3.25938	2.51862e-17	1.67574e-15
Zm00001d053055	4.7995	2.57373e-17	1.70839e-15
Zm00001d045831	10.9116	3.11921e-17	2.06562e-15
Zm00001d001900	3.55487	3.16768e-17	2.09282e-15
Zm00001d005973	3.11187	3.28514e-17	2.16536e-15
Zm00001d028230	3.47873	3.53443e-17	2.32426e-15
Zm00001d029410	3.11401	3.80276e-17	2.49181e-15
Zm00001d037073	7.48206	3.80685e-17	2.49181e-15
Zm00001d012527	3.50258	3.82086e-17	2.4952e-15
Zm00001d001832	7.55695	4.42802e-17	2.88505e-15
Zm00001d007485	3.11706	4.58512e-17	2.98054e-15
Zm00001d052843	5.88242	4.71787e-17	3.0528e-15
Zm00001d038551	5.20075	4.70821e-17	3.0528e-15
Zm00001d039532	10.7591	4.74529e-17	3.06353e-15
Zm00001d011626	3.07965	5.08079e-17	3.27286e-15
Zm00001d035542	3.74873	5.33948e-17	3.43928e-15
Zm00001d015397	5.50216	6.42116e-17	4.12662e-15
Zm00001d044646	3.11302	6.45997e-17	4.14215e-15
Zm00001d023208	-3.06703	6.65856e-17	4.25982e-15
Zm00001d003495	3.1085	6.90686e-17	4.4087e-15
Zm00001d039459	10.6684	7.02786e-17	4.47583e-15
Zm00001d005158	3.61575	7.35483e-17	4.67354e-15
Zm00001d006534	3.58005	7.82008e-17	4.95803e-15
Zm00001d031152	4.87637	9.49353e-17	6.00556e-15
Zm00001d013934	3.28754	9.64962e-17	6.09067e-15
Zm00001d036328	3.13472	9.7299e-17	6.12767e-15
Zm00001d016103	7.54228	9.91155e-17	6.2282e-15
Zm00001d045295	3.34066	1.00318e-16	6.28976e-15
Zm00001d037759	4.57871	1.08975e-16	6.81746e-15
Zm00001d010388	5.2018	1.17143e-16	7.31224e-15
Zm00001d031164	6.40223	1.29626e-16	8.07364e-15
Zm00001d043569	3.27494	1.31746e-16	8.18763e-15
Zm00001d042875	10.7223	1.32476e-16	8.21496e-15
Zm00001d007187	6.66013	1.54175e-16	9.53961e-15
Zm00001d014062	3.30455	1.57716e-16	9.73742e-15
Zm00001d025533	4.55627	1.63087e-16	1.00471e-14
Zm00001d048832	6.73722	1.63951e-16	1.00784e-14
Zm00001d029497	3.0382	1.665e-16	1.02129e-14
Zm00001d027530	4.31568	1.91783e-16	1.17382e-14
Zm00001d042136	4.43344	2.31058e-16	1.41115e-14
Zm00001d026572	4.38976	2.41791e-16	1.47352e-14
Zm00001d049704	10.8632	2.9122e-16	1.77093e-14
Zm00001d027947	7.20366	2.95713e-16	1.79439e-14
Zm00001d039786	-3.49484	3.07102e-16	1.86038e-14
Zm00001d011013	3.49545	3.42652e-16	2.07477e-14
Zm00001d014491	4.52556	3.78297e-16	2.2857e-14
Zm00001d041025	5.04121	3.85097e-16	2.32183e-14
Zm00001d051001	3.52383	4.50178e-16	2.70844e-14
Zm00001d002898	8.23639	4.55898e-16	2.73704e-14
Zm00001d003657	10.5189	4.82223e-16	2.88895e-14
Zm00001d005392	3.11173	4.89204e-16	2.92457e-14
Zm00001d024843	3.22722	5.11021e-16	3.04856e-14
Zm00001d002295	7.96721	6.02235e-16	3.58514e-14
Zm00001d021897	6.45606	6.31337e-16	3.75049e-14
Zm00001d018686	5.05896	6.56302e-16	3.89062e-14
Zm00001d038291	-3.74664	6.79781e-16	4.02137e-14
Zm00001d040067	3.64562	7.13216e-16	4.21036e-14
Zm00001d034365	3.12008	7.54651e-16	4.44568e-14
Zm00001d005698	4.18178	7.6549e-16	4.50016e-14
Zm00001d049107	3.60336	8.19118e-16	4.80543e-14
Zm00001d037550	3.03716	8.33664e-16	4.88065e-14
Zm00001d046468	4.01497	9.32457e-16	5.44775e-14
Zm00001d029597	2.91843	9.69748e-16	5.65393e-14
Zm00001d014129	2.94802	9.93179e-16	5.76676e-14
Zm00001d037005	5.3258	9.92518e-16	5.76676e-14
Zm00001d027908	7.33398	1.01754e-15	5.89609e-14
Zm00001d029258	3.25973	1.03433e-15	5.98116e-14
Zm00001d018700	4.42904	1.09261e-15	6.30527e-14
Zm00001d052317	4.76403	1.23632e-15	7.12004e-14
Zm00001d019100	-3.25408	1.25367e-15	7.20526e-14
Zm00001d017806	4.2648	1.27058e-15	7.28769e-14
Zm00001d052243	8.06255	1.27387e-15	7.29172e-14
Zm00001d050011	3.67004	1.2812e-15	7.3189e-14
Zm00001d005028	4.55052	1.31591e-15	7.502e-14
Zm00001d036647	7.00269	1.34703e-15	7.66396e-14
Zm00001d047440	10.3109	1.45632e-15	8.26914e-14
Zm00001d036164	10.4294	1.59282e-15	9.02609e-14
Zm00001d040050	6.87019	1.60518e-15	9.07795e-14
Zm00001d020495	5.81641	1.63e-15	9.19992e-14
Zm00001d007329	8.06546	1.66486e-15	9.37795e-14
Zm00001d048329	5.86659	1.67827e-15	9.43468e-14
Zm00001d027949	6.86233	1.73802e-15	9.75117e-14
Zm00001d023554	3.85822	1.82415e-15	1.02142e-13
Zm00001d050840	4.09295	1.87588e-15	1.04831e-13
Zm00001d011527	4.55669	1.94588e-15	1.08528e-13
Zm00001d006531	7.40836	1.99848e-15	1.11242e-13
Zm00001d028467	3.93621	2.1348e-15	1.18597e-13
Zm00001d032265	4.71374	2.16005e-15	1.19764e-13
Zm00001d025296	5.06233	2.17681e-15	1.20457e-13
Zm00001d022457	4.77265	2.34525e-15	1.29525e-13
Zm00001d028012	3.93856	2.43001e-15	1.3379e-13
Zm00001d020687	2.91308	2.43194e-15	1.3379e-13
Zm00001d048947	5.9528	2.48841e-15	1.36631e-13
Zm00001d024853	3.19141	2.56509e-15	1.40568e-13
Zm00001d035865	5.07606	2.58353e-15	1.41304e-13
Zm00001d028785	2.9741	2.87001e-15	1.56671e-13
Zm00001d016664	3.13669	2.88443e-15	1.57154e-13
Zm00001d038548	4.35752	3.0161e-15	1.64012e-13
Zm00001d008479	3.27585	3.06467e-15	1.66333e-13
Zm00001d011767	2.92706	3.58912e-15	1.94424e-13
Zm00001d020163	7.13586	3.60318e-15	1.94813e-13
Zm00001d051157	3.04901	3.76393e-15	2.03116e-13
Zm00001d009365	2.90461	3.89574e-15	2.09828e-13
Zm00001d029387	-3.58374	4.23734e-15	2.27794e-13
Zm00001d038178	4.6519	4.25585e-15	2.28354e-13
Zm00001d052999	10.2291	4.61956e-15	2.46933e-13
Zm00001d004847	7.99109	5.02926e-15	2.68325e-13
Zm00001d042608	4.71228	5.27713e-15	2.81019e-13
Zm00001d050430	2.97787	5.4764e-15	2.91083e-13
Zm00001d021442	-2.891	5.77146e-15	3.06191e-13
Zm00001d049954	2.89421	5.88045e-15	3.11389e-13
Zm00001d018611	-3.48304	6.34412e-15	3.35314e-13
Zm00001d005977	3.45081	6.39691e-15	3.37473e-13
Zm00001d021168	6.63654	6.7141e-15	3.53547e-13
Zm00001d017682	3.39265	7.36022e-15	3.86849e-13
Zm00001d001818	6.80975	8.10233e-15	4.34444e-13
Zm00001d028004	7.41329	8.29367e-15	4.35102e-13
Zm00001d013797	2.93723	9.05986e-15	4.74418e-13
Zm00001d043795	5.06857	1.01082e-14	5.27736e-13
Zm00001d033714	3.33744	1.01154e-14	5.27736e-13
Zm00001d052346	3.41041	1.04357e-14	5.43444e-13
Zm00001d032692	2.96087	1.0641e-14	5.53118e-13
Zm00001d050671	10.1138	1.1198e-14	5.81002e-13
Zm00001d011736	4.57186	1.24007e-14	6.42225e-13
Zm00001d011625	2.8157	1.28351e-14	6.63508e-13
Zm00001d016121	7.25065	1.37315e-14	7.08552e-13
Zm00001d017976	7.23961	1.40617e-14	7.24267e-13
Zm00001d028962	3.32033	1.41131e-14	7.2551e-13
Zm00001d045007	5.83823	1.41371e-14	7.2551e-13
Zm00001d021266	7.14113	1.51458e-14	7.75867e-13
Zm00001d017965	5.70646	1.54432e-14	7.89672e-13
Zm00001d016806	5.54813	1.549e-14	7.90634e-13
Zm00001d012604	3.82175	1.57128e-14	8.00563e-13
Zm00001d006755	5.70181	1.58194e-14	8.0454e-13
Zm00001d028368	-3.15614	1.97943e-14	1.00309e-12
Zm00001d007714	7.98323	2.01561e-14	1.0196e-12
Zm00001d002901	10.1891	2.12186e-14	1.07142e-12
Zm00001d044146	5.16567	2.16068e-14	1.08908e-12
Zm00001d041574	7.33662	2.17908e-14	1.0964e-12
Zm00001d047355	6.43281	2.2428e-14	1.12646e-12
Zm00001d025333	4.26557	2.30235e-14	1.15432e-12
Zm00001d021693	3.78676	2.50651e-14	1.25445e-12
Zm00001d037913	3.50637	2.5907e-14	1.2943e-12
Zm00001d040183	3.00881	2.60722e-14	1.30026e-12
Zm00001d020915	2.96915	2.64361e-14	1.31608e-12
Zm00001d025016	3.06103	2.71976e-14	1.35161e-12
Zm00001d053995	4.59472	2.75417e-14	1.36631e-12
Zm00001d042274	2.84647	2.8542e-14	1.41346e-12
Zm00001d043701	8.08408	3.13562e-14	1.55011e-12
Zm00001d044253	2.88902	3.18662e-14	1.56983e-12
Zm00001d040554	3.71292	3.18223e-14	1.56983e-12
Zm00001d039799	5.60982	3.34404e-14	1.64451e-12
Zm00001d049239	2.83464	3.40283e-14	1.67052e-12
Zm00001d027991	3.93486	3.65205e-14	1.78976e-12
Zm00001d044340	3.28357	3.69924e-14	1.80975e-12
Zm00001d003857	2.86041	3.85514e-14	1.88276e-12
Zm00001d004921	6.50205	3.88498e-14	1.89406e-12
Zm00001d014530	2.83158	4.08133e-14	1.98636e-12
Zm00001d041363	2.8585	4.16522e-14	2.02371e-12
Zm00001d029617	8.45879	4.18485e-14	2.02976e-12
Zm00001d014903	3.31337	4.4318e-14	2.14585e-12
Zm00001d032527	2.98215	4.62598e-14	2.23605e-12
Zm00001d024943	10.1389	4.85872e-14	2.34454e-12
Zm00001d050805	8.61704	5.02643e-14	2.42133e-12
Zm00001d047591	3.36125	5.31053e-14	2.55384e-12
Zm00001d046743	3.02425	5.47153e-14	2.6268e-12
Zm00001d004768	3.2436	5.63215e-14	2.69932e-12
Zm00001d014792	2.7667	5.68647e-14	2.71615e-12
Zm00001d021955	2.95671	5.67927e-14	2.71615e-12
Zm00001d047351	2.84883	6.09645e-14	2.90707e-12
Zm00001d034277	9.98752	6.24728e-14	2.97398e-12
Zm00001d053409	2.89133	6.50159e-14	3.08984e-12
Zm00001d032103	3.4056	6.51578e-14	3.09139e-12
Zm00001d048178	-4.00037	6.66496e-14	3.15687e-12
Zm00001d002673	3.59979	6.70497e-14	3.17051e-12
Zm00001d005542	3.03936	6.77417e-14	3.19788e-12
Zm00001d020808	-3.00173	6.93697e-14	3.26928e-12
Zm00001d042572	4.52242	7.07424e-14	3.32842e-12
Zm00001d018681	10.2294	7.30584e-14	3.43168e-12
Zm00001d027996	3.0496	7.41745e-14	3.47833e-12
Zm00001d034205	3.66516	7.57954e-14	3.54846e-12
Zm00001d042933	7.12039	7.64001e-14	3.57085e-12
Zm00001d023664	3.77605	7.76763e-14	3.62451e-12
Zm00001d028165	6.71447	7.84997e-14	3.6569e-12
Zm00001d004804	3.31007	8.09136e-14	3.76315e-12
Zm00001d038262	3.01758	8.33778e-14	3.86539e-12
Zm00001d003447	7.93577	8.33854e-14	3.86539e-12
Zm00001d021192	3.85135	8.95763e-14	4.14558e-12
Zm00001d037322	9.95944	9.08282e-14	4.19665e-12
Zm00001d027708	3.49343	9.35754e-14	4.31653e-12
Zm00001d003355	5.28246	9.57776e-14	4.41092e-12
Zm00001d034859	2.72698	9.68076e-14	4.4511e-12
Zm00001d040780	3.31051	9.83663e-14	4.51543e-12
Zm00001d006293	-3.01483	1.08144e-13	4.95621e-12
Zm00001d042624,Zm00001d042625	3.56595	1.21816e-13	5.57376e-12
Zm00001d005423	3.91663	1.19138e-13	5.5975e-12
Zm00001d016637	7.76303	1.31171e-13	5.99214e-12
Zm00001d035163	2.77375	1.41359e-13	6.4471e-12
Zm00001d050514	4.21036	1.5009e-13	6.83428e-12
Zm00001d040023	4.41738	1.55976e-13	7.09091e-12
Zm00001d040048	5.40303	1.58453e-13	7.19192e-12
Zm00001d042114	2.92846	1.62647e-13	7.37048e-12
Zm00001d042887	4.46838	1.81454e-13	8.20954e-12
Zm00001d052355	7.1712	1.83267e-13	8.27832e-12
Zm00001d034501	2.84558	1.95893e-13	8.83454e-12
Zm00001d007764	3.89638	2.05986e-13	9.27496e-12
Zm00001d046474	3.76805	2.17418e-13	9.77414e-12
Zm00001d015470	-2.91074	2.25442e-13	1.01188e-11
Zm00001d053778	2.75901	2.27583e-13	1.01987e-11
Zm00001d041580	5.8706	2.41501e-13	1.08053e-11
Zm00001d006374	2.76823	2.43957e-13	1.08979e-11
Zm00001d028879	7.57902	2.541e-13	1.13331e-11
Zm00001d017380	4.71019	2.58651e-13	1.15179e-11
Zm00001d039880	4.25368	2.65048e-13	1.17842e-11
Zm00001d046467	2.61021	2.84338e-13	1.2622e-11
Zm00001d029996	3.58928	2.98001e-13	1.32078e-11
Zm00001d047242	4.04642	3.24519e-13	1.43606e-11
Zm00001d004525	2.80282	3.38816e-13	1.49698e-11
Zm00001d022041	3.02719	3.40682e-13	1.50288e-11
Zm00001d053236	4.10217	3.78271e-13	1.6661e-11
Zm00001d011643	4.37223	3.8799e-13	1.70625e-11
Zm00001d031222	3.60298	3.89058e-13	1.70829e-11
Zm00001d023617	9.85158	4.00185e-13	1.75442e-11
Zm00001d006759	2.75209	4.02462e-13	1.76168e-11
Zm00001d043752	4.54648	4.15053e-13	1.81398e-11
Zm00001d046554	2.81209	4.35552e-13	1.90063e-11
Zm00001d049727	3.10017	4.46332e-13	1.94467e-11
Zm00001d002475	3.55672	4.4823e-13	1.94994e-11
Zm00001d044734	5.31737	5.27992e-13	2.2934e-11
Zm00001d019228	2.91036	5.5117e-13	2.3904e-11
Zm00001d021901	6.69011	6.24359e-13	2.70368e-11
Zm00001d037397	5.56598	6.91961e-13	2.98727e-11
Zm00001d048020	4.44476	6.99344e-13	3.01453e-11
Zm00001d008891	3.81957	7.14948e-13	3.06105e-11
Zm00001d026255	8.10916	7.22641e-13	3.11022e-11
Zm00001d009783	2.58196	7.26735e-13	3.11834e-11
Zm00001d003861	2.64611	7.26011e-13	3.11834e-11
Zm00001d034066	2.84675	8.08095e-13	3.4622e-11
Zm00001d004079	3.03017	8.24848e-13	3.52863e-11
Zm00001d012170	2.56261	8.57434e-13	3.66249e-11
Zm00001d043301	2.68954	8.89745e-13	3.78453e-11
Zm00001d023279	5.62606	8.9002e-13	3.78453e-11
Zm00001d012173	2.60859	9.05327e-13	3.84383e-11
Zm00001d014650	6.44403	9.34685e-13	3.96253e-11
Zm00001d037547	3.03432	9.41549e-13	3.98566e-11
Zm00001d008923	3.97439	9.64595e-13	4.07711e-11
Zm00001d019505	2.80108	9.76953e-13	4.12318e-11
Zm00001d044162	6.52972	1.07011e-12	4.50963e-11
Zm00001d005936	5.29647	1.07583e-12	4.52696e-11
Zm00001d020492	4.49869	1.25266e-12	5.26322e-11
Zm00001d021176	5.84749	1.26043e-12	5.28803e-11
Zm00001d012257	3.15944	1.31811e-12	5.51365e-11
Zm00001d042088	2.91626	1.3181e-12	5.51365e-11
Zm00001d008287	2.88771	1.34227e-12	5.60642e-11
Zm00001d042107	3.43934	1.37259e-12	5.72458e-11
Zm00001d013151	5.3356	1.45597e-12	6.06341e-11
Zm00001d024211	10.0226	1.48473e-12	6.17408e-11
Zm00001d040318	2.58082	1.49653e-12	6.21399e-11
Zm00001d044540	5.94979	1.50946e-12	6.25848e-11
Zm00001d003015	3.68904	1.54359e-12	6.39065e-11
Zm00001d009814	3.14475	1.56776e-12	6.48122e-11
Zm00001d048588	5.74017	1.6648e-12	6.87235e-11
Zm00001d016586	2.79509	1.7295e-12	7.12903e-11
Zm00001d043166	3.00668	1.7367e-12	7.14585e-11
Zm00001d009222	7.56103	1.73864e-12	7.14585e-11
Zm00001d010800	6.71699	1.74229e-12	7.15049e-11
Zm00001d019060	4.28403	1.95705e-12	8.0202e-11
Zm00001d013210	3.59736	2.0379e-12	8.33945e-11
Zm00001d020351	4.95059	2.27387e-12	9.29165e-11
Zm00001d044106	2.5562	2.30738e-12	9.41497e-11
Zm00001d032114	4.47146	2.35628e-12	9.60065e-11
Zm00001d007843	4.96494	2.42386e-12	9.8618e-11
Zm00001d050346	-2.59876	2.7637e-12	1.12283e-10
Zm00001d037774	-2.57492	2.8167e-12	1.14273e-10
Zm00001d047349	2.47342	2.92274e-12	1.18405e-10
Zm00001d034129	4.54773	3.07234e-12	1.24287e-10
Zm00001d032102	3.65119	3.18654e-12	1.28723e-10
Zm00001d025305	2.59601	3.23849e-12	1.30634e-10
Zm00001d009605	-2.45705	3.3088e-12	1.33818e-10
Zm00001d028721	6.76687	3.34641e-12	1.34795e-10
Zm00001d010190	2.52824	3.50758e-12	1.41086e-10
Zm00001d002536	6.81329	3.54072e-12	1.42217e-10
Zm00001d003505	3.8219	3.78329e-12	1.51745e-10
Zm00001d002302	5.21308	4.0413e-12	1.61864e-10
Zm00001d025814	4.36011	4.11417e-12	1.6455e-10
Zm00001d022430	9.6173	4.18918e-12	1.67313e-10
Zm00001d034508	5.19954	4.2157e-12	1.68134e-10
Zm00001d020703	5.41469	4.34694e-12	1.73125e-10
Zm00001d020628	2.57418	4.58052e-12	1.82171e-10
Zm00001d028572	3.52235	4.96001e-12	1.96986e-10
Zm00001d008190	6.49728	4.97946e-12	1.97481e-10
Zm00001d011838	2.70095	5.20957e-12	2.06318e-10
Zm00001d048819	-2.62594	5.22822e-12	2.06767e-10
Zm00001d035689	6.71881	6.11222e-12	2.4139e-10
Zm00001d029356	6.61698	6.34642e-12	2.5029e-10
Zm00001d048601	9.65802	6.43506e-12	2.53432e-10
Zm00001d052962	3.63363	6.58642e-12	2.59032e-10
Zm00001d031223	2.76323	6.71017e-12	2.63533e-10
Zm00001d009603	-2.49453	6.76575e-12	2.65347e-10
Zm00001d045051	4.28618	6.80906e-12	2.66675e-10
Zm00001d052990	2.72791	6.93043e-12	2.70679e-10
Zm00001d045359	2.52665	7.20753e-12	2.81113e-10
Zm00001d004524	6.64332	7.37865e-12	2.87391e-10
Zm00001d051693	4.58254	7.46402e-12	2.90316e-10
Zm00001d053781	6.64568	7.55904e-12	2.93608e-10
Zm00001d020136	2.7813	7.81283e-12	3.0305e-10
Zm00001d052136	2.99486	8.10439e-12	3.13929e-10
Zm00001d027449	3.17287	8.59336e-12	3.32414e-10
Zm00001d034497	2.68421	9.07604e-12	3.50606e-10
Zm00001d011778	5.27943	9.79362e-12	3.77809e-10
Zm00001d042134	4.41032	1.0022e-11	3.86091e-10
Zm00001d017809	2.45988	1.04344e-11	4.01435e-10
Zm00001d038820	2.91775	1.05613e-11	4.05764e-10
Zm00001d026632	3.03127	1.10777e-11	4.25027e-10
Zm00001d045788	4.88513	1.12676e-11	4.31727e-10
Zm00001d003358	2.75416	1.17869e-11	4.51013e-10
Zm00001d021929	4.76782	1.20463e-11	4.60315e-10
Zm00001d009468	7.22798	1.21601e-11	4.64038e-10
Zm00001d012603	4.88892	1.22002e-11	4.64938e-10
Zm00001d049217	9.55985	1.25228e-11	4.76593e-10
Zm00001d008651	3.07482	1.2723e-11	4.83558e-10
Zm00001d039520	9.65349	1.29064e-11	4.8931e-10
Zm00001d031203,Zm00001d031204	2.41834	1.34279e-11	5.09666e-10
Zm00001d050837	3.28629	1.35686e-11	5.14314e-10
Zm00001d030981	2.54737	1.47212e-11	5.57259e-10
Zm00001d010399	3.47663	1.53085e-11	5.78714e-10
Zm00001d010617	9.49283	1.60386e-11	6.05504e-10
Zm00001d029803	-2.51243	1.66183e-11	6.26553e-10
Zm00001d036950	2.38274	1.81621e-11	6.83846e-10
Zm00001d034270	3.23551	1.88927e-11	7.10411e-10
Zm00001d003848	-2.68989	1.91557e-11	7.19345e-10
Zm00001d024752	4.70201	1.92711e-11	7.22718e-10
Zm00001d010406	6.61243	1.93293e-11	7.2394e-10
Zm00001d052172	6.22955	1.94963e-11	7.2923e-10
Zm00001d037630	4.63032	1.95408e-11	7.29926e-10
Zm00001d039355	2.8201	2.0062e-11	7.48408e-10
Zm00001d039769	2.71498	2.07243e-11	7.72095e-10
Zm00001d016014	3.16662	2.1871e-11	8.13743e-10
Zm00001d026505	3.47579	2.27382e-11	8.44897e-10
Zm00001d046334	-2.58423	2.27776e-11	8.45253e-10
Zm00001d029501	4.88852	2.31601e-11	8.58322e-10
Zm00001d043935	2.88483	2.32105e-11	8.59063e-10
Zm00001d045948	2.41501	2.3973e-11	8.86122e-10
Zm00001d031407	2.59249	2.43279e-11	8.98067e-10
Zm00001d035457	5.00493	2.51956e-11	9.28885e-10
Zm00001d033624	2.92288	2.93676e-11	1.08129e-09
Zm00001d042108	3.12589	2.97159e-11	1.09269e-09
Zm00001d046961	3.01359	2.99493e-11	1.09984e-09
Zm00001d051015	2.40773	3.02163e-11	1.10821e-09
Zm00001d047752	7.23359	3.04903e-11	1.1168e-09
Zm00001d050132	2.48157	3.20921e-11	1.17396e-09
Zm00001d021930	2.45687	3.22733e-11	1.17906e-09
Zm00001d034107	2.77082	3.50924e-11	1.2804e-09
Zm00001d016457	5.75808	3.73429e-11	1.36076e-09
Zm00001d049099	2.4867	3.91928e-11	1.42632e-09
Zm00001d052164,Zm00001d052165	-2.55987	4.09086e-11	1.48685e-09
Zm00001d039416	2.99942	4.11511e-11	1.49375e-09
Zm00001d044060	2.50955	4.17162e-11	1.51232e-09
Zm00001d043025	3.61205	4.18306e-11	1.51452e-09
Zm00001d037542	6.65842	4.20533e-11	1.52064e-09
Zm00001d028999	3.30475	4.35261e-11	1.57189e-09
Zm00001d047358	2.65958	4.60497e-11	1.6609e-09
Zm00001d038576	2.84571	4.66609e-11	1.6808e-09
Zm00001d018461	2.68429	4.71389e-11	1.69586e-09
Zm00001d039496	5.8564	4.83962e-11	1.73888e-09
Zm00001d020277	2.66544	4.89882e-11	1.75792e-09
Zm00001d042739	2.87403	4.9718e-11	1.78185e-09
Zm00001d004655	2.43225	5.00152e-11	1.79023e-09
Zm00001d020339	3.12529	5.08772e-11	1.81676e-09
Zm00001d048499	2.31954	5.08851e-11	1.81676e-09
Zm00001d014244	5.34029	5.1345e-11	1.83087e-09
Zm00001d021726	4.58865	5.26289e-11	1.87429e-09
Zm00001d012101	2.43639	5.29182e-11	1.88222e-09
Zm00001d045232	3.3138	5.33323e-11	1.89219e-09
Zm00001d018730	2.59354	5.32705e-11	1.89219e-09
Zm00001d047000	4.16623	5.35829e-11	1.8987e-09
Zm00001d017766	-2.88759	5.5426e-11	1.96155e-09
Zm00001d028987	2.76141	5.5975e-11	1.97851e-09
Zm00001d027976	2.42816	5.64413e-11	1.9925e-09
Zm00001d038764	2.5954	5.73824e-11	2.02319e-09
Zm00001d007285	6.56707	5.87506e-11	2.06885e-09
Zm00001d023611	4.00929	5.95217e-11	2.0934e-09
Zm00001d004706	2.3596	6.18861e-11	2.17386e-09
Zm00001d009473	9.36336	6.31364e-11	2.21502e-09
Zm00001d015589	2.95449	6.49057e-11	2.27427e-09
Zm00001d024574	2.39218	6.55586e-11	2.29431e-09
Zm00001d010115	2.74153	6.60531e-11	2.30875e-09
Zm00001d003287	2.81416	6.71261e-11	2.34337e-09
Zm00001d011967	3.8062	6.81589e-11	2.37649e-09
Zm00001d047644	9.44466	6.82973e-11	2.37838e-09
Zm00001d017851	5.79447	6.98909e-11	2.43088e-09
Zm00001d010411	-2.71342	7.43494e-11	2.58135e-09
Zm00001d028465	2.78757	7.43997e-11	2.58135e-09
Zm00001d045043	2.3578	7.47914e-11	2.59176e-09
Zm00001d044769	3.6963	7.7122e-11	2.66925e-09
Zm00001d034986	4.44019	7.88845e-11	2.72692e-09
Zm00001d036016	4.84524	8.08699e-11	2.79214e-09
Zm00001d041327	3.76473	8.14597e-11	2.80907e-09
Zm00001d021577	3.1749	8.21909e-11	2.83083e-09
Zm00001d039772	-3.16363	8.29669e-11	2.85408e-09
Zm00001d003021	2.60376	8.93586e-11	3.07022e-09
Zm00001d037852	2.5682	8.99615e-11	3.08719e-09
Zm00001d049103	2.88184	9.06995e-11	3.10874e-09
Zm00001d013208	3.02643	9.5026e-11	3.25309e-09
Zm00001d029457	2.28871	9.66343e-11	3.30415e-09
Zm00001d015201	4.82171	9.82336e-11	3.35477e-09
Zm00001d032152	2.48419	9.84656e-11	3.35864e-09
Zm00001d025566	5.42786	1.00617e-10	3.42787e-09
Zm00001d049632	2.3369	1.01561e-10	3.45174e-09
Zm00001d029078	-2.84227	1.23273e-10	4.18207e-09
Zm00001d017852	2.8677	1.23346e-10	4.18207e-09
Zm00001d042868	2.96499	1.25048e-10	4.23472e-09
Zm00001d014744	-2.43194	1.29971e-10	4.39615e-09
Zm00001d029684	2.42255	1.34039e-10	4.52835e-09
Zm00001d048709	-3.56881	1.34966e-10	4.54839e-09
Zm00001d035450	2.91659	1.35115e-10	4.54839e-09
Zm00001d048533	2.99721	1.35036e-10	4.54839e-09
Zm00001d035178	4.84124	1.37049e-10	4.608e-09
Zm00001d043610	4.29081	1.39546e-10	4.68639e-09
Zm00001d045557	2.40988	1.40159e-10	4.70138e-09
Zm00001d052244	4.682	1.40533e-10	4.70836e-09
Zm00001d017913	-2.31152	1.48618e-10	4.97333e-09
Zm00001d037872	3.35751	1.49065e-10	4.98241e-09
Zm00001d008498	2.30106	1.5299e-10	5.10756e-09
Zm00001d047664	5.01849	1.54527e-10	5.15277e-09
Zm00001d047640	3.21652	1.61989e-10	5.39524e-09
Zm00001d007186	2.67839	1.62636e-10	5.41033e-09
Zm00001d009599	-3.73885	1.62825e-10	5.41033e-09
Zm00001d004279	-2.56423	1.68768e-10	5.60123e-09
Zm00001d013782	3.79135	1.69495e-10	5.61878e-09
Zm00001d033906	2.29105	1.78595e-10	5.91351e-09
Zm00001d015401	2.25124	1.79248e-10	5.92819e-09
Zm00001d041163	5.69276	1.89606e-10	6.26343e-09
Zm00001d028711	2.63379	1.90771e-10	6.29455e-09
Zm00001d042371	2.275	1.92806e-10	6.35428e-09
Zm00001d039183	4.31714	1.94958e-10	6.41773e-09
Zm00001d010812	3.728	2.02398e-10	6.65489e-09
Zm00001d007015	4.98787	2.0392e-10	6.69715e-09
Zm00001d038115	3.36334	2.05967e-10	6.75651e-09
Zm00001d004075	2.6827	2.06563e-10	6.76822e-09
Zm00001d021936	2.28721	2.08562e-10	6.82581e-09
Zm00001d004375	4.81742	2.19045e-10	7.16063e-09
Zm00001d052927	5.21927	2.22771e-10	7.27401e-09
Zm00001d045862	9.24152	2.24809e-10	7.3321e-09
Zm00001d032745	5.04368	2.36459e-10	7.70318e-09
Zm00001d027680	2.45546	2.40767e-10	7.76344e-09
Zm00001d035561	-5.75444	2.47317e-10	8.04763e-09
Zm00001d052457	2.40424	2.47642e-10	8.04894e-09
Zm00001d047812	2.23849	2.73169e-10	8.86842e-09
Zm00001d028374	5.97873	2.77338e-10	8.99344e-09
Zm00001d044723	2.86081	3.05171e-10	9.88467e-09
Zm00001d053623	2.596	3.17739e-10	1.028e-08
Zm00001d043571	-2.26242	3.29631e-10	1.06526e-08
Zm00001d023918	2.4236	3.36022e-10	1.08467e-08
Zm00001d001774	4.27516	3.42607e-10	1.08869e-08
Zm00001d042082	-4.35246	3.45283e-10	1.11329e-08
Zm00001d047209	2.21214	3.45778e-10	1.11362e-08
Zm00001d048333	4.56371	3.47347e-10	1.1174e-08
Zm00001d044475	2.20951	3.53401e-10	1.13558e-08
Zm00001d028653	2.33962	3.56864e-10	1.14541e-08
Zm00001d039527	5.88162	3.57318e-10	1.14556e-08
Zm00001d008273	4.22859	3.64012e-10	1.1657e-08
Zm00001d033543	-2.55682	3.73063e-10	1.19334e-08
Zm00001d043651	3.33334	3.80368e-10	1.21533e-08
Zm00001d050164	4.06438	3.88517e-10	1.23997e-08
Zm00001d028870	6.31734	3.96921e-10	1.26536e-08
Zm00001d027727	2.32013	4.0061e-10	1.27568e-08
Zm00001d009138	6.1724	4.24104e-10	1.34897e-08
Zm00001d000914	6.92824	4.6515e-10	1.44582e-08
Zm00001d010838	2.22673	4.77353e-10	1.51324e-08
Zm00001d002055	5.45285	4.77116e-10	1.51324e-08
Zm00001d022192	6.87734	4.79126e-10	1.51716e-08
Zm00001d008548	5.77082	4.92642e-10	1.55822e-08
Zm00001d035767	-2.96384	4.9582e-10	1.56651e-08
Zm00001d042260	4.73264	4.99426e-10	1.57615e-08
Zm00001d016285	2.21164	5.07779e-10	1.60072e-08
Zm00001d032932	5.25171	5.35327e-10	1.68569e-08
Zm00001d036014	-2.44546	5.38939e-10	1.69517e-08
Zm00001d022026	4.9041	5.44905e-10	1.71203e-08
Zm00001d037935	7.1882	5.50175e-10	1.72667e-08
Zm00001d006825	4.52143	5.53473e-10	1.73509e-08
Zm00001d030976	4.39499	5.57495e-10	1.74577e-08
Zm00001d045517	2.54148	5.60198e-10	1.75229e-08
Zm00001d031372	2.61855	5.62701e-10	1.75818e-08
Zm00001d048866	4.15706	5.73788e-10	1.79084e-08
Zm00001d033718	2.70245	5.92894e-10	1.84843e-08
Zm00001d043663	6.1946	6.14904e-10	1.91494e-08
Zm00001d012607	2.25881	6.21169e-10	1.93232e-08
Zm00001d031677	2.1992	6.28319e-10	1.95242e-08
Zm00001d028649	2.63182	6.71476e-10	2.08194e-08
Zm00001d023995	-5.4746	6.93203e-10	2.14696e-08
Zm00001d031614	3.47804	7.05813e-10	2.18362e-08
Zm00001d044906	3.54794	7.10466e-10	2.19561e-08
Zm00001d045919	-2.34785	7.15991e-10	2.21027e-08
Zm00001d016607	6.23535	7.18093e-10	2.21434e-08
Zm00001d011438	3.82165	7.2852e-10	2.24405e-08
Zm00001d015515	2.28106	7.29661e-10	2.24512e-08
Zm00001d008489	3.77126	7.55513e-10	2.32213e-08
Zm00001d035925	2.39573	7.62351e-10	2.34061e-08
Zm00001d023336	4.61967	7.72762e-10	2.37e-08
Zm00001d030614	6.58685	7.76433e-10	2.37868e-08
Zm00001d045661	-2.42137	7.79744e-10	2.38366e-08
Zm00001d028510	-3.56091	7.79215e-10	2.38366e-08
Zm00001d022512	-2.22383	7.86662e-10	2.40221e-08
Zm00001d002864	2.26411	8.07233e-10	2.46237e-08
Zm00001d011628	2.90416	8.17497e-10	2.49099e-08
Zm00001d002753	4.85744	8.31625e-10	2.53131e-08
Zm00001d019256	3.63659	8.84124e-10	2.68821e-08
Zm00001d027893	2.48008	8.98366e-10	2.72858e-08
Zm00001d038365	-2.4909	9.10027e-10	2.76104e-08
Zm00001d033344	-2.16384	9.18446e-10	2.78359e-08
Zm00001d032582	2.75477	9.20815e-10	2.78778e-08
Zm00001d036357	9.0673	9.34263e-10	2.82547e-08
Zm00001d004072	4.78322	9.3701e-10	2.83075e-08
Zm00001d021582	2.12837	9.54727e-10	2.8812e-08
Zm00001d030544	2.67942	9.70342e-10	2.9252e-08
Zm00001d021459	3.90965	9.87363e-10	2.97334e-08
Zm00001d024835	-2.19039	9.93417e-10	2.98839e-08
Zm00001d008462	2.16998	1.01057e-09	3.03677e-08
Zm00001d007633	2.251	1.03164e-09	3.09679e-08
Zm00001d048516	-2.29737	1.04352e-09	3.12914e-08
Zm00001d005620	6.18485	1.04817e-09	3.13974e-08
Zm00001d013097	4.57853	1.09525e-09	3.27729e-08
Zm00001d004159	2.1328	1.09885e-09	3.28111e-08
Zm00001d044765	-2.2511	1.0977e-09	3.28111e-08
Zm00001d051675	2.18145	1.11001e-09	3.31094e-08
Zm00001d021850	-2.16092	1.12125e-09	3.34096e-08
Zm00001d041608	2.31799	1.21213e-09	3.60793e-08
Zm00001d028988	6.22037	1.21699e-09	3.61859e-08
Zm00001d031366	2.84086	1.256e-09	3.73065e-08
Zm00001d002333	-2.87917	1.2884e-09	3.82288e-08
Zm00001d022081	2.89821	1.31448e-09	3.89617e-08
Zm00001d037918	2.29847	1.32109e-09	3.91168e-08
Zm00001d039049	-4.76351	1.3341e-09	3.94607e-08
Zm00001d053715	2.44035	1.35957e-09	4.01719e-08
Zm00001d042337	3.7576	1.3719e-09	4.04518e-08
Zm00001d012322	3.80695	1.38267e-09	4.07267e-08
Zm00001d029246	4.00429	1.39614e-09	4.10809e-08
Zm00001d044124	5.55314	1.42469e-09	4.18774e-08
Zm00001d008210	4.08777	1.44746e-09	4.24582e-08
Zm00001d012988	-2.67675	1.44706e-09	4.24582e-08
Zm00001d038199	-4.21878	1.47349e-09	4.31772e-08
Zm00001d043762	2.24029	1.51261e-09	4.42775e-08
Zm00001d004903	-2.3115	1.51502e-09	4.43021e-08
Zm00001d007709	2.37162	1.52613e-09	4.45809e-08
Zm00001d034602	2.11363	1.53251e-09	4.4721e-08
Zm00001d027992	2.36063	1.55187e-09	4.52393e-08
Zm00001d016017	3.19037	1.64813e-09	4.78974e-08
Zm00001d011629	2.63918	1.64747e-09	4.78974e-08
Zm00001d046152	9.09103	1.70515e-09	4.95037e-08
Zm00001d038991	2.31168	1.7117e-09	4.9643e-08
Zm00001d046234	2.59695	1.75919e-09	5.09678e-08
Zm00001d040818	-2.33192	1.76137e-09	5.09787e-08
Zm00001d048702	-2.50662	1.77355e-09	5.12788e-08
Zm00001d016797	2.32326	1.79365e-09	5.1763e-08
Zm00001d053926	4.0656	1.79396e-09	5.1763e-08
Zm00001d052963	9.26639	1.80198e-09	5.19415e-08
Zm00001d028903	2.14184	1.82753e-09	5.26023e-08
Zm00001d044654	3.11116	1.82863e-09	5.26023e-08
Zm00001d017713	6.91783	1.93277e-09	5.55415e-08
Zm00001d040071	9.08249	1.95729e-09	5.61892e-08
Zm00001d049186	4.14728	2.04655e-09	5.86921e-08
Zm00001d018454	2.09599	2.07627e-09	5.94839e-08
Zm00001d010463	2.74836	2.16432e-09	6.18813e-08
Zm00001d035157	2.50127	2.16412e-09	6.18813e-08
Zm00001d009146	2.57294	2.25529e-09	6.44171e-08
Zm00001d002700	-2.20075	2.3139e-09	6.59577e-08
Zm00001d048647	3.00375	2.31187e-09	6.59577e-08
Zm00001d028303	2.73696	2.36323e-09	6.72962e-08
Zm00001d037656	4.10682	2.42036e-09	6.88536e-08
Zm00001d030942	3.47796	2.42919e-09	6.90353e-08
Zm00001d043197	2.5363	2.45023e-09	6.95633e-08
Zm00001d044156	2.12328	2.49051e-09	7.06359e-08
Zm00001d020674	3.10163	2.50768e-09	7.10519e-08
Zm00001d051460	5.66888	2.64881e-09	7.49667e-08
Zm00001d021401	2.16014	2.65116e-09	7.49667e-08
Zm00001d030577	2.79741	2.70916e-09	7.65303e-08
Zm00001d003949	-2.37689	2.72146e-09	7.6801e-08
Zm00001d034494	2.9869	2.74048e-09	7.72607e-08
Zm00001d038467	7.28248	2.8034e-09	7.8956e-08
Zm00001d021977	5.49757	2.82598e-09	7.95128e-08
Zm00001d005951	-3.18134	2.86664e-09	8.05765e-08
Zm00001d022597	3.08374	2.87382e-09	8.0698e-08
Zm00001d052190	8.88584	2.89056e-09	8.10875e-08
Zm00001d053518	3.0015	3.10576e-09	8.70383e-08
Zm00001d019139	2.30403	3.1696e-09	8.87395e-08
Zm00001d012674	2.05043	3.36406e-09	9.40906e-08
Zm00001d008278	2.11317	3.41353e-09	9.53797e-08
Zm00001d008073	4.85248	3.45223e-09	9.55216e-08
Zm00001d043491	3.25239	3.59836e-09	1.00445e-07
Zm00001d037061	3.16066	3.61279e-09	1.00748e-07
Zm00001d009755	8.83624	3.6757e-09	1.02402e-07
Zm00001d051754	2.53624	3.70425e-09	1.03095e-07
Zm00001d013039	-2.37067	3.92969e-09	1.09262e-07
Zm00001d003501	4.25339	4.10459e-09	1.14013e-07
Zm00001d052209	4.39284	4.24911e-09	1.17912e-07
Zm00001d053308	2.10335	4.36518e-09	1.21014e-07
Zm00001d015623	4.3112	4.40104e-09	1.21888e-07
Zm00001d010634	-2.26454	4.49232e-09	1.24295e-07
Zm00001d048741	2.88849	4.49974e-09	1.24368e-07
Zm00001d018292	4.27394	4.50375e-09	1.24368e-07
Zm00001d015459	2.5609	4.52652e-09	1.24874e-07
Zm00001d051692	3.96429	4.7298e-09	1.30228e-07
Zm00001d007915	2.60538	4.80467e-09	1.32161e-07
Zm00001d037909	4.26397	4.82326e-09	1.32544e-07
Zm00001d048683	4.19667	4.8927e-09	1.34321e-07
Zm00001d006360	2.85611	4.91984e-09	1.34935e-07
Zm00001d013955	6.13326	5.01161e-09	1.36025e-07
Zm00001d051163	3.4376	5.09007e-09	1.39469e-07
Zm00001d010368	2.03898	5.21707e-09	1.4281e-07
Zm00001d028172	-3.84017	5.22303e-09	1.42835e-07
Zm00001d046812,Zm00001d046813	2.34437	5.31272e-09	1.45148e-07
Zm00001d048623	-2.5982	5.51636e-09	1.50566e-07
Zm00001d014953	2.01714	5.59224e-09	1.5249e-07
Zm00001d045361	3.08304	5.68793e-09	1.54949e-07
Zm00001d029662	3.74364	5.7371e-09	1.56138e-07
Zm00001d042731	2.28751	5.77071e-09	1.56766e-07
Zm00001d005782	3.7903	5.87474e-09	1.59424e-07
Zm00001d002996	3.84481	6.0083e-09	1.60326e-07
Zm00001d028692	4.07129	5.9142e-09	1.60341e-07
Zm00001d020429	3.25363	5.96088e-09	1.61452e-07
Zm00001d029408	2.1661	6.30597e-09	1.70635e-07
Zm00001d017418	-2.64405	6.51073e-09	1.76008e-07
Zm00001d049957	5.96806	6.61208e-09	1.78577e-07
Zm00001d042438	-2.06241	6.66976e-09	1.79963e-07
Zm00001d021303	4.35306	6.93653e-09	1.86982e-07
Zm00001d007789	2.44044	7.02142e-09	1.8909e-07
Zm00001d023547	-9.08088	7.11688e-09	1.91479e-07
Zm00001d053217	2.01485	7.15351e-09	1.92281e-07
Zm00001d029028	2.116	7.19783e-09	1.93289e-07
Zm00001d005470	3.11917	7.32641e-09	1.96555e-07
Zm00001d049273	3.34468	7.33584e-09	1.96621e-07
Zm00001d052322	2.81881	7.46851e-09	1.99988e-07
Zm00001d039276	-2.01478	7.49378e-09	2.00474e-07
Zm00001d021692	2.61448	7.50446e-09	2.0057e-07
Zm00001d014126	2.44604	8.12024e-09	2.16823e-07
Zm00001d039384	4.33267	8.18468e-09	2.18338e-07
Zm00001d008733	2.06194	8.39701e-09	2.18537e-07
Zm00001d034425	3.86397	8.23573e-09	2.19493e-07
Zm00001d020638	4.57796	8.35199e-09	2.22382e-07
Zm00001d038728	-2.46962	8.37999e-09	2.22917e-07
Zm00001d003364	9.13321	8.4513e-09	2.24603e-07
Zm00001d038522	2.18263	8.56041e-09	2.27289e-07
Zm00001d050803	9.4285	8.64008e-09	2.29189e-07
Zm00001d044639	3.33453	9.01077e-09	2.38798e-07
Zm00001d020569	4.31127	9.11275e-09	2.41275e-07
Zm00001d016942	3.06968	9.32181e-09	2.46579e-07
Zm00001d040842	-2.02617	9.6545e-09	2.55141e-07
Zm00001d032301	-2.10614	9.68808e-09	2.55789e-07
Zm00001d026366	4.70079	9.95805e-09	2.62671e-07
Zm00001d002705	-2.26568	1.00114e-08	2.63833e-07
Zm00001d043490	2.03791	1.00924e-08	2.65473e-07
Zm00001d048050	2.40006	1.00863e-08	2.65473e-07
Zm00001d008976	2.82407	1.03445e-08	2.71724e-07
Zm00001d029233	-3.85671	1.03493e-08	2.71724e-07
Zm00001d042869	2.14044	1.0365e-08	2.71883e-07
Zm00001d008250	2.72282	1.05479e-08	2.76425e-07
Zm00001d033054	2.10995	1.06362e-08	2.7848e-07
Zm00001d010737	8.71058	1.08078e-08	2.82452e-07
Zm00001d031813	3.46364	1.09974e-08	2.87141e-07
Zm00001d039349	-2.09237	1.1205e-08	2.9229e-07
Zm00001d037035	2.56242	1.13333e-08	2.95364e-07
Zm00001d026657	4.99707	1.13498e-08	2.95523e-07
Zm00001d000824	3.82411	1.16558e-08	2.96307e-07
Zm00001d040667	2.00787	1.14952e-08	2.99033e-07
Zm00001d013185	2.96726	1.16364e-08	3.02428e-07
Zm00001d052813	6.65676	1.17314e-08	3.04618e-07
Zm00001d027892	3.77701	1.17844e-08	3.05504e-07
Zm00001d036901	3.57278	1.17871e-08	3.05504e-07
Zm00001d044117	-2.30727	1.18289e-08	3.06306e-07
Zm00001d017502	-2.05764	1.20038e-08	3.10551e-07
Zm00001d028214	2.17533	1.20182e-08	3.10639e-07
Zm00001d052906	8.68362	1.21569e-08	3.13935e-07
Zm00001d043200	3.08742	1.21975e-08	3.14275e-07
Zm00001d012962	2.85327	1.22033e-08	3.14275e-07
Zm00001d047893	2.67079	1.21901e-08	3.14275e-07
Zm00001d051397	5.57993	1.27172e-08	3.26913e-07
Zm00001d002020	2.51012	1.30254e-08	3.34299e-07
Zm00001d034781	2.16574	1.30282e-08	3.34299e-07
Zm00001d043672	8.65525	1.31694e-08	3.37616e-07
Zm00001d027434	2.34426	1.34923e-08	3.45269e-07
Zm00001d013335	2.48777	1.34894e-08	3.45269e-07
Zm00001d032215	-2.03957	1.4171e-08	3.62307e-07
Zm00001d020267	2.24154	1.44816e-08	3.69916e-07
Zm00001d020544	4.38967	1.4628e-08	3.73317e-07
Zm00001d007202	3.27372	1.4738e-08	3.75786e-07
Zm00001d045800	2.35516	1.52887e-08	3.89477e-07
Zm00001d053212	3.07213	1.55888e-08	3.96763e-07
Zm00001d045145	-2.12809	1.59709e-08	4.06124e-07
Zm00001d029320	3.7542	1.69929e-08	4.31335e-07
Zm00001d034072	2.27402	1.70236e-08	4.31727e-07
Zm00001d050518	2.26451	1.75377e-08	4.44367e-07
Zm00001d002351	-3.42762	1.76864e-08	4.47733e-07
Zm00001d011833	-2.01396	1.77207e-08	4.48201e-07
Zm00001d022166	-2.22745	1.778e-08	4.493e-07
Zm00001d033003	4.23005	1.79263e-08	4.52186e-07
Zm00001d000428	2.16811	1.79216e-08	4.52186e-07
Zm00001d044516	2.32827	1.79563e-08	4.52541e-07
Zm00001d043175	1.94407	1.85234e-08	4.66418e-07
Zm00001d007959	3.55149	1.87245e-08	4.71061e-07
Zm00001d034417	5.06096	1.88094e-08	4.72776e-07
Zm00001d015884	5.08151	1.90345e-08	4.78008e-07
Zm00001d052118	-2.15317	1.91705e-08	4.80997e-07
Zm00001d042669	2.01482	1.93372e-08	4.84751e-07
Zm00001d029371	4.53184	1.98567e-08	4.96893e-07
Zm00001d020552	1.99344	2.02747e-08	5.06457e-07
Zm00001d018421	2.73621	2.03224e-08	5.07199e-07
Zm00001d052220	3.10572	2.04249e-08	5.09307e-07
Zm00001d002847	2.49363	2.10951e-08	5.25557e-07
Zm00001d023548	4.08203	2.12023e-08	5.27761e-07
Zm00001d018965	3.99248	2.16599e-08	5.30267e-07
Zm00001d049597	2.29656	2.14303e-08	5.32967e-07
Zm00001d025834	-2.13922	2.1497e-08	5.34157e-07
Zm00001d002798	-2.89093	2.17557e-08	5.4011e-07
Zm00001d016414	4.80258	2.2126e-08	5.40285e-07
Zm00001d037982	-2.2948	2.18234e-08	5.41317e-07
Zm00001d043837	8.62761	2.19648e-08	5.44346e-07
Zm00001d028389	-2.24862	2.21533e-08	5.48537e-07
Zm00001d025263	1.98496	2.23609e-08	5.53193e-07
Zm00001d043056	2.05335	2.28852e-08	5.65668e-07
Zm00001d002725	2.03797	2.3006e-08	5.68158e-07
Zm00001d053997	2.3231	2.3186e-08	5.72104e-07
Zm00001d022264	-2.40429	2.32376e-08	5.72878e-07
Zm00001d020886	3.58795	2.34848e-08	5.77946e-07
Zm00001d047325	4.17153	2.35045e-08	5.77946e-07
Zm00001d011154	-2.12428	2.36517e-08	5.81059e-07
Zm00001d033651	1.98372	2.38128e-08	5.84447e-07
Zm00001d051761	1.94531	2.38309e-08	5.84447e-07
Zm00001d018671	10.9474	2.41588e-08	5.91461e-07
Zm00001d018332	3.59562	2.41388e-08	5.91461e-07
Zm00001d020266	6.81859	2.43793e-08	5.96343e-07
Zm00001d043871	4.3282	2.48193e-08	6.06583e-07
Zm00001d033574	2.08109	2.52106e-08	6.15613e-07
Zm00001d017984	2.64383	2.53488e-08	6.18455e-07
Zm00001d053639	4.00757	2.55547e-08	6.22939e-07
Zm00001d006053	5.45615	2.56409e-08	6.24504e-07
Zm00001d036650	2.93136	2.59017e-08	6.30312e-07
Zm00001d049219	5.86148	2.60035e-08	6.32245e-07
Zm00001d044339	-2.27583	2.64696e-08	6.43025e-07
Zm00001d023608	2.06383	2.657e-08	6.4491e-07
Zm00001d040697	2.04079	2.68298e-08	6.50657e-07
Zm00001d054044	1.93903	2.70497e-08	6.55427e-07
Zm00001d021659	2.20211	2.72023e-08	6.5856e-07
Zm00001d042637	-2.75546	2.73177e-08	6.6079e-07
Zm00001d048561	2.04844	2.74668e-08	6.63829e-07
Zm00001d032992	-2.06058	2.78139e-08	6.71644e-07
Zm00001d034322	8.54322	2.7975e-08	6.74956e-07
Zm00001d047908	1.92845	2.83276e-08	6.82881e-07
Zm00001d051542	5.09442	2.89716e-08	6.97811e-07
Zm00001d003966	2.2276	2.95739e-08	7.11106e-07
Zm00001d046628	-1.93353	2.95573e-08	7.11106e-07
Zm00001d007850	8.68127	2.96721e-08	7.12862e-07
Zm00001d054017	2.00533	3.07167e-08	7.37332e-07
Zm00001d012100	-5.33658	3.12496e-08	7.49486e-07
Zm00001d039764	4.32486	3.19187e-08	7.64239e-07
Zm00001d017178	-1.93587	3.34465e-08	8.00141e-07
Zm00001d027332	-2.05936	3.36841e-08	8.05143e-07
Zm00001d014518	-2.5965	3.40529e-08	8.13272e-07
Zm00001d025170	1.99495	3.4159e-08	8.15118e-07
Zm00001d024851	5.09098	3.5043e-08	8.35508e-07
Zm00001d019361	2.62367	3.51974e-08	8.3848e-07
Zm00001d036641	3.05081	3.55259e-08	8.45594e-07
Zm00001d021841	-1.96112	3.56e-08	8.46202e-07
Zm00001d004086	2.22235	3.56113e-08	8.46202e-07
Zm00001d019479	-1.9686	3.5669e-08	8.46863e-07
Zm00001d011459	3.23088	3.63543e-08	8.62407e-07
Zm00001d016696	2.66907	3.80439e-08	9.01733e-07
Zm00001d039118	-2.86553	3.8471e-08	9.11092e-07
Zm00001d008816	1.92425	3.91027e-08	9.25279e-07
Zm00001d012407	2.68106	3.91708e-08	9.26115e-07
Zm00001d022374	2.21107	3.92039e-08	9.26123e-07
Zm00001d030995	-1.92257	3.93388e-08	9.28533e-07
Zm00001d028667	8.50501	3.94954e-08	9.31452e-07
Zm00001d035629	-2.25203	3.96421e-08	9.34134e-07
Zm00001d038882	-2.46698	4.08198e-08	9.60284e-07
Zm00001d001879	-2.91884	4.11236e-08	9.66626e-07
Zm00001d043458	4.44327	4.16633e-08	9.78499e-07
Zm00001d042135	2.54327	4.20909e-08	9.87723e-07
Zm00001d037342	-3.91861	4.23093e-08	9.92024e-07
Zm00001d026677	-1.90519	4.24646e-08	9.94839e-07
Zm00001d003903	6.58575	4.34591e-08	1.01729e-06
Zm00001d047981	2.98099	4.38982e-08	1.02596e-06
Zm00001d010956	2.45255	4.39016e-08	1.02596e-06
Zm00001d002316	2.44056	4.39584e-08	1.02644e-06
Zm00001d039825	3.75522	4.40528e-08	1.02694e-06
Zm00001d032855	2.05286	4.40213e-08	1.02694e-06
Zm00001d031749	-2.30988	4.41682e-08	1.02878e-06
Zm00001d042207	2.27519	4.43843e-08	1.03297e-06
Zm00001d006246	2.09863	4.46437e-08	1.03815e-06
Zm00001d051803	2.04943	4.51535e-08	1.04914e-06
Zm00001d020752	3.73799	4.55912e-08	1.05844e-06
Zm00001d008394	-2.00883	4.57372e-08	1.06079e-06
Zm00001d053828	-2.15025	4.57676e-08	1.06079e-06
Zm00001d012686	-2.26705	4.59535e-08	1.06423e-06
Zm00001d049732	1.95833	4.61858e-08	1.06874e-06
Zm00001d002540	2.02049	4.78898e-08	1.10726e-06
Zm00001d051014	2.25688	4.91378e-08	1.13519e-06
Zm00001d033389	3.66669	4.94321e-08	1.14106e-06
Zm00001d028443	1.99307	5.14882e-08	1.18755e-06
Zm00001d048416	4.83682	5.2583e-08	1.21181e-06
Zm00001d054106	1.91083	5.32922e-08	1.22715e-06
Zm00001d050106	-2.57835	5.33732e-08	1.22802e-06
Zm00001d025798	2.07262	5.4614e-08	1.25555e-06
Zm00001d037784	-2.91725	5.57456e-08	1.28052e-06
Zm00001d017186	2.0843	5.61543e-08	1.28886e-06
Zm00001d024934	2.30352	5.62915e-08	1.29096e-06
Zm00001d036761	3.6531	5.74336e-08	1.31608e-06
Zm00001d020250	6.28493	5.76173e-08	1.31891e-06
Zm00001d007803	3.85794	5.765e-08	1.31891e-06
Zm00001d029321	2.29226	5.80175e-08	1.32624e-06
Zm00001d045599	3.63927	5.83909e-08	1.3337e-06
Zm00001d003249	3.89924	5.94018e-08	1.35569e-06
Zm00001d043178	2.10147	6.01316e-08	1.37124e-06
Zm00001d021572	2.98828	6.05632e-08	1.37997e-06
Zm00001d031922	6.02221	6.33649e-08	1.44265e-06
Zm00001d023759	-1.94406	6.34868e-08	1.44426e-06
Zm00001d049560	1.98847	6.41741e-08	1.45872e-06
Zm00001d014116	2.40848	6.5017e-08	1.4767e-06
Zm00001d003923	1.91866	6.62276e-08	1.50298e-06
Zm00001d003552	-2.01566	6.64349e-08	1.50648e-06
Zm00001d048358	2.00814	6.72579e-08	1.52285e-06
Zm00001d006328	1.89592	6.72647e-08	1.52285e-06
Zm00001d016009	3.52298	6.74595e-08	1.52604e-06
Zm00001d046993	8.6819	6.80966e-08	1.53922e-06
Zm00001d026586	-2.00164	6.83823e-08	1.54445e-06
Zm00001d021949	4.32347	6.88018e-08	1.55268e-06
Zm00001d010871	-1.93426	6.89106e-08	1.5539e-06
Zm00001d030285	2.18116	6.98669e-08	1.5742e-06
Zm00001d049213	5.48646	7.04942e-08	1.58707e-06
Zm00001d045042	2.63428	7.07017e-08	1.59048e-06
Zm00001d024543	2.27721	7.09431e-08	1.59464e-06
Zm00001d030767	-2.21036	7.25813e-08	1.63017e-06
Zm00001d049785	-1.90715	7.55879e-08	1.69635e-06
Zm00001d029084	1.92254	7.582e-08	1.70021e-06
Zm00001d011164	3.6569	7.64875e-08	1.71382e-06
Zm00001d013644	2.38188	7.75244e-08	1.73568e-06
Zm00001d027757	-2.05842	7.85868e-08	1.7568e-06
Zm00001d039374	2.32836	7.85922e-08	1.7568e-06
Zm00001d006567	1.92744	7.89104e-08	1.76252e-06
Zm00001d002632	2.06718	7.98806e-08	1.78278e-06
Zm00001d049303	2.74665	8.00624e-08	1.78543e-06
Zm00001d052261	-2.44441	8.06345e-08	1.79677e-06
Zm00001d020260	8.53795	8.07959e-08	1.79895e-06
Zm00001d046852	4.99019	8.13834e-08	1.80776e-06
Zm00001d036482	2.76477	8.12997e-08	1.80776e-06
Zm00001d038808	1.86276	8.1343e-08	1.80776e-06
Zm00001d054089	1.91411	8.28957e-08	1.83846e-06
Zm00001d038905	2.363	8.28846e-08	1.83846e-06
Zm00001d037160	-2.9984	8.39906e-08	1.86129e-06
Zm00001d013907	5.29803	8.53089e-08	1.88902e-06
Zm00001d012782	4.8795	8.55753e-08	1.89286e-06
Zm00001d034418	4.0765	8.56163e-08	1.89286e-06
Zm00001d053143	-2.52639	8.61824e-08	1.90389e-06
Zm00001d047275	2.2253	8.65001e-08	1.90942e-06
Zm00001d042750	3.52507	8.7288e-08	1.92531e-06
Zm00001d006203	1.89475	8.83839e-08	1.94796e-06
Zm00001d019223	-2.509	9.20624e-08	2.02745e-06
Zm00001d004309	-3.65016	9.31652e-08	2.05014e-06
Zm00001d027763	-3.60641	9.35381e-08	2.05675e-06
Zm00001d032870	3.55897	9.51163e-08	2.0882e-06
Zm00001d028280	2.93018	9.54215e-08	2.09328e-06
Zm00001d015129	4.18554	9.66116e-08	2.11774e-06
Zm00001d000829	-4.00201	9.8613e-08	2.16477e-06
Zm00001d053554	3.82234	9.88386e-08	2.16488e-06
Zm00001d053410	3.48156	9.90446e-08	2.16771e-06
Zm00001d040517	-3.50837	9.98836e-08	2.18438e-06
Zm00001d039848	-1.84336	1.02153e-07	2.23057e-06
Zm00001d043199	2.64442	1.02303e-07	2.23212e-06
Zm00001d026297	6.29181	1.04491e-07	2.27809e-06
Zm00001d015626	8.63969	1.0431e-07	2.28279e-06
Zm00001d003352	2.04775	1.05203e-07	2.29185e-06
Zm00001d025379	3.27304	1.0636e-07	2.31528e-06
Zm00001d038555	2.84171	1.10276e-07	2.39868e-06
Zm00001d005424	1.92663	1.10557e-07	2.40294e-06
Zm00001d050265	1.98454	1.11178e-07	2.41457e-06
Zm00001d023625	5.7931	1.11354e-07	2.41655e-06
Zm00001d024204	2.07312	1.11627e-07	2.42061e-06
Zm00001d017650	4.11673	1.15957e-07	2.51258e-06
Zm00001d017203	-1.84195	1.16141e-07	2.51463e-06
Zm00001d011446	2.08949	1.16695e-07	2.5247e-06
Zm00001d034130	3.91186	1.17915e-07	2.54855e-06
Zm00001d047276	-2.74703	1.17977e-07	2.54855e-06
Zm00001d006153	1.84347	1.18482e-07	2.55749e-06
Zm00001d033514	-5.52935	1.19077e-07	2.57431e-06
Zm00001d043238	2.84974	1.20348e-07	2.59579e-06
Zm00001d011063	-3.35216	1.22849e-07	2.64771e-06
Zm00001d016415	5.10648	1.23032e-07	2.64976e-06
Zm00001d036293	2.75899	1.23903e-07	2.6684e-06
Zm00001d051901	2.66093	1.26263e-07	2.71715e-06
Zm00001d024753	8.32338	1.27873e-07	2.7497e-06
Zm00001d026662	2.36286	1.28465e-07	2.76033e-06
Zm00001d009010	-3.57561	1.28825e-07	2.76597e-06
Zm00001d052585	5.68693	1.28961e-07	2.76679e-06
Zm00001d033510	2.11353	1.29369e-07	2.77344e-06
Zm00001d007180	3.27774	1.29958e-07	2.78396e-06
Zm00001d002364	3.72446	1.30369e-07	2.79064e-06
Zm00001d048908	1.83825	1.31809e-07	2.81934e-06
Zm00001d052725	3.10441	1.31984e-07	2.82095e-06
Zm00001d012561	1.84679	1.32661e-07	2.83327e-06
Zm00001d002313	-1.85953	1.39896e-07	2.98554e-06
Zm00001d050021	5.57642	1.41161e-07	3.01027e-06
Zm00001d037934	2.36949	1.44308e-07	3.07505e-06
Zm00001d005866	1.96042	1.44541e-07	3.07771e-06
Zm00001d031395	2.25697	1.48101e-07	3.15112e-06
Zm00001d023615	2.84886	1.51493e-07	3.22087e-06
Zm00001d005164	1.83094	1.52445e-07	3.23868e-06
Zm00001d051468	8.66461	1.53299e-07	3.25438e-06
Zm00001d042974	-2.82355	1.54663e-07	3.28088e-06
Zm00001d011958	1.85695	1.56769e-07	3.32306e-06
Zm00001d025887	1.99769	1.60599e-07	3.4017e-06
Zm00001d042993	2.17165	1.61337e-07	3.41476e-06
Zm00001d030108	1.9573	1.62203e-07	3.43052e-06
Zm00001d012090	-2.58334	1.62822e-07	3.44105e-06
Zm00001d052184	-1.97217	1.6605e-07	3.50354e-06
Zm00001d017420	3.85351	1.66151e-07	3.50354e-06
Zm00001d052992	1.90081	1.66046e-07	3.50354e-06
Zm00001d037435	3.41335	1.67058e-07	3.52005e-06
Zm00001d021974	1.89175	1.67646e-07	3.52981e-06
Zm00001d037095	3.6374	1.68221e-07	3.53928e-06
Zm00001d050393	-1.83935	1.68806e-07	3.54893e-06
Zm00001d047663	3.12445	1.72124e-07	3.616e-06
Zm00001d013261	-1.9265	1.76935e-07	3.71433e-06
Zm00001d020309	3.28302	1.77407e-07	3.71945e-06
Zm00001d034145	2.97826	1.77443e-07	3.71945e-06
Zm00001d002402	-2.08898	1.79779e-07	3.76564e-06
Zm00001d039426	3.87834	1.80495e-07	3.77784e-06
Zm00001d047758	1.85759	1.80734e-07	3.78005e-06
Zm00001d052525	2.18576	1.81609e-07	3.79547e-06
Zm00001d014181	2.73692	1.8174e-07	3.79547e-06
Zm00001d033774	8.25372	1.82305e-07	3.80166e-06
Zm00001d017287	6.08201	1.82199e-07	3.80166e-06
Zm00001d010670	2.88723	1.82942e-07	3.81004e-06
Zm00001d033858	1.99181	1.82977e-07	3.81004e-06
Zm00001d023707	-1.81631	1.83382e-07	3.81567e-06
Zm00001d009503	-2.37753	1.83945e-07	3.82458e-06
Zm00001d044024	-2.43226	1.84663e-07	3.83668e-06
Zm00001d021397	2.21101	1.85423e-07	3.84964e-06
Zm00001d019044	3.9021	1.87669e-07	3.89341e-06
Zm00001d009936	4.1691	1.89991e-07	3.93868e-06
Zm00001d051810	8.44295	1.90983e-07	3.95347e-06
Zm00001d025131	1.81923	1.92794e-07	3.98803e-06
Zm00001d038326	1.98421	1.9462e-07	4.02286e-06
Zm00001d024946	3.39996	1.96294e-07	4.05451e-06
Zm00001d025753	5.55794	1.97368e-07	4.0737e-06
Zm00001d049525	-1.86212	2.06172e-07	4.25231e-06
Zm00001d019734	8.24582	2.13301e-07	4.39614e-06
Zm00001d012255	2.89096	2.13935e-07	4.40599e-06
Zm00001d032810	-2.17839	2.15245e-07	4.42975e-06
Zm00001d052684	-4.51096	2.18124e-07	4.48574e-06
Zm00001d003483	5.59082	2.18592e-07	4.4921e-06
Zm00001d021299	2.02216	2.21126e-07	4.54088e-06
Zm00001d036784	-3.23386	2.21615e-07	4.54761e-06
Zm00001d049277	6.05541	2.21974e-07	4.55167e-06
Zm00001d034745	1.88692	2.24014e-07	4.59017e-06
Zm00001d014865	-1.79565	2.24883e-07	4.60464e-06
Zm00001d031023	3.55522	2.28831e-07	4.6821e-06
Zm00001d053394	1.97926	2.29225e-07	4.68676e-06
Zm00001d041221	3.21911	2.39197e-07	4.88713e-06
Zm00001d028455	2.95688	2.4008e-07	4.90162e-06
Zm00001d022516	-1.91872	2.40283e-07	4.90222e-06
Zm00001d017966	1.78731	2.4289e-07	4.95184e-06
Zm00001d012337	-2.01449	2.46368e-07	5.01912e-06
Zm00001d013796	2.06993	2.51475e-07	5.11948e-06
Zm00001d042184	1.77427	2.53017e-07	5.14373e-06
Zm00001d029170	1.84116	2.53212e-07	5.14373e-06
Zm00001d024768	2.18331	2.53086e-07	5.14373e-06
Zm00001d053342	-1.83513	2.55416e-07	5.18477e-06
Zm00001d037180	3.54108	2.55875e-07	5.19036e-06
Zm00001d033669	1.81618	2.56413e-07	5.19755e-06
Zm00001d028534	2.08214	2.57214e-07	5.21007e-06
Zm00001d046132	3.89974	2.57812e-07	5.21844e-06
Zm00001d012427	8.18585	2.61287e-07	5.28499e-06
Zm00001d006875	-2.52326	2.63183e-07	5.31953e-06
Zm00001d011056	2.90456	2.65003e-07	5.35248e-06
Zm00001d023530	-2.19199	2.69422e-07	5.43785e-06
Zm00001d007301	1.92528	2.7756e-07	5.59812e-06
Zm00001d013787	1.92568	2.87954e-07	5.80361e-06
Zm00001d029713	2.72619	2.90612e-07	5.85302e-06
Zm00001d029583	2.91622	2.9455e-07	5.9281e-06
Zm00001d032279	1.87234	2.96529e-07	5.96368e-06
Zm00001d002503	1.88491	2.9881e-07	6.0053e-06
Zm00001d032120	3.58761	3.03013e-07	6.08544e-06
Zm00001d038638	2.91565	3.03388e-07	6.08865e-06
Zm00001d013113	2.56105	3.04878e-07	6.1142e-06
Zm00001d042851	2.28882	3.08894e-07	6.19036e-06
Zm00001d002592	3.37749	3.1232e-07	6.25458e-06
Zm00001d011378	5.12122	3.15549e-07	6.31478e-06
Zm00001d002177	3.7387	3.16437e-07	6.32807e-06
Zm00001d053974	-2.03362	3.21241e-07	6.4196e-06
Zm00001d035306	4.09717	3.26607e-07	6.52221e-06
Zm00001d015164	2.80592	3.31425e-07	6.61376e-06
Zm00001d033567	2.31784	3.44762e-07	6.87507e-06
Zm00001d037229	-3.36414	3.45781e-07	6.89053e-06
Zm00001d006866	-1.79763	3.50259e-07	6.97485e-06
Zm00001d013777	1.78001	3.52176e-07	7.00809e-06
Zm00001d035386	9.79983	3.52689e-07	7.01334e-06
Zm00001d034763	2.41992	3.53838e-07	7.03125e-06
Zm00001d032560	2.10645	3.57231e-07	7.0937e-06
Zm00001d012731	-2.30212	3.62632e-07	7.19588e-06
Zm00001d034782	4.05834	3.82443e-07	7.57837e-06
Zm00001d011451	3.97066	3.84806e-07	7.61986e-06
Zm00001d051995	3.45895	3.95368e-07	7.82352e-06
Zm00001d011405	-3.45623	3.99672e-07	7.90193e-06
Zm00001d030683	2.95599	3.99889e-07	7.90193e-06
Zm00001d004021	-1.81096	4.0094e-07	7.91717e-06
Zm00001d021487	3.12198	4.01667e-07	7.92598e-06
Zm00001d012769	8.17231	4.03076e-07	7.94825e-06
Zm00001d016697	2.64509	4.05645e-07	7.99332e-06
Zm00001d010796	1.77761	4.08007e-07	8.02868e-06
Zm00001d035662	-2.63935	4.1703e-07	8.20052e-06
Zm00001d045644	3.92961	4.18645e-07	8.22657e-06
Zm00001d025726	1.82877	4.21287e-07	8.26747e-06
Zm00001d045836	-1.98616	4.21312e-07	8.26747e-06
Zm00001d048705	-2.40383	4.23631e-07	8.30722e-06
Zm00001d028867	-1.7784	4.26919e-07	8.36589e-06
Zm00001d002776	3.54097	4.32466e-07	8.46872e-06
Zm00001d036965	1.90622	4.36871e-07	8.54906e-06
Zm00001d000002	3.5333	4.3847e-07	8.57443e-06
Zm00001d008957	-1.8645	4.39824e-07	8.5831e-06
Zm00001d015306	2.04023	4.39763e-07	8.5831e-06
Zm00001d029365	1.78177	4.3949e-07	8.5831e-06
Zm00001d014785	1.73507	4.41143e-07	8.60289e-06
Zm00001d032238	-2.02062	4.48117e-07	8.73287e-06
Zm00001d007753	2.61566	4.49042e-07	8.74488e-06
Zm00001d014258	2.49781	4.51552e-07	8.78771e-06
Zm00001d010755	-1.73861	4.54632e-07	8.84156e-06
Zm00001d007831	3.45553	4.60319e-07	8.94601e-06
Zm00001d025099	-1.82758	4.62809e-07	8.98822e-06
Zm00001d033746	-1.78723	4.7061e-07	9.13345e-06
Zm00001d027622	3.26864	4.73415e-07	9.18159e-06
Zm00001d019754	1.76455	4.77513e-07	9.25472e-06
Zm00001d010385	5.48491	4.78693e-07	9.27123e-06
Zm00001d044100	8.08082	4.87713e-07	9.43947e-06
Zm00001d031412	1.87253	4.91112e-07	9.49875e-06
Zm00001d031381	2.21577	4.91552e-07	9.50077e-06
Zm00001d037781	4.3317	4.97965e-07	9.61814e-06
Zm00001d019670	-1.81635	4.98536e-07	9.62259e-06
Zm00001d031940	2.0755	5.05315e-07	9.74417e-06
Zm00001d017037	-1.89171	5.05524e-07	9.74417e-06
Zm00001d005538	2.06603	5.2412e-07	1.00957e-05
Zm00001d039745	-1.77238	5.26151e-07	1.0128e-05
Zm00001d016584	2.20355	5.32334e-07	1.024e-05
Zm00001d033719	-1.97752	5.34917e-07	1.02827e-05
Zm00001d038746	2.97602	5.36935e-07	1.03145e-05
Zm00001d024324	4.1301	5.3835e-07	1.03346e-05
Zm00001d044686	-1.81405	5.43262e-07	1.04219e-05
Zm00001d025129	-1.93547	5.43775e-07	1.04246e-05
Zm00001d014013	-2.43945	5.44186e-07	1.04254e-05
Zm00001d027271	-2.13755	5.51322e-07	1.0555e-05
Zm00001d049716	2.85697	5.52104e-07	1.05628e-05
Zm00001d023384	2.81952	5.55937e-07	1.0629e-05
Zm00001d009187	3.19553	5.61011e-07	1.07187e-05
Zm00001d026139	-2.20312	5.61554e-07	1.07218e-05
Zm00001d029630	8.07504	5.67421e-07	1.08266e-05
Zm00001d039053	2.03756	5.68362e-07	1.08372e-05
Zm00001d037586	1.99196	5.70465e-07	1.087e-05
Zm00001d017085	1.73028	5.83253e-07	1.11062e-05
Zm00001d022372	8.41984	5.8584e-07	1.11479e-05
Zm00001d038494	1.84441	5.86759e-07	1.11504e-05
Zm00001d037318	2.24589	5.86424e-07	1.11504e-05
Zm00001d026291	2.29361	5.87224e-07	1.11517e-05
Zm00001d005010	3.35285	5.89867e-07	1.11944e-05
Zm00001d039454	1.89633	5.91971e-07	1.12268e-05
Zm00001d024268	-2.54068	5.95999e-07	1.12956e-05
Zm00001d032517	-1.89445	6.00401e-07	1.13714e-05
Zm00001d032116	2.71516	6.01187e-07	1.13787e-05
Zm00001d006297	3.71141	6.02225e-07	1.13907e-05
Zm00001d053150	-1.80294	6.05981e-07	1.14541e-05
Zm00001d009071	-2.1148	6.1228e-07	1.15654e-05
Zm00001d017215	-1.90464	6.13452e-07	1.15798e-05
Zm00001d016760	3.74647	6.1772e-07	1.16526e-05
Zm00001d005879	3.90353	6.22007e-07	1.17257e-05
Zm00001d044254	3.34067	6.23879e-07	1.17531e-05
Zm00001d044951	-2.22144	6.30369e-07	1.18675e-05
Zm00001d040310	2.9423	6.39678e-07	1.20267e-05
Zm00001d034257	-2.00603	6.40729e-07	1.20385e-05
Zm00001d040422	-2.06119	6.55693e-07	1.23114e-05
Zm00001d042751	3.09164	6.61569e-07	1.24135e-05
Zm00001d009908	2.48864	6.72658e-07	1.26132e-05
Zm00001d039795	4.44519	6.74699e-07	1.26431e-05
Zm00001d031527	1.9338	6.75544e-07	1.26506e-05
Zm00001d037155	3.70548	6.85528e-07	1.28206e-05
Zm00001d036263	2.70665	6.86167e-07	1.2824e-05
Zm00001d026670	2.22748	6.94182e-07	1.29567e-05
Zm00001d039011	2.34214	6.93893e-07	1.29567e-05
Zm00001d044685	-1.82857	7.05626e-07	1.31616e-05
Zm00001d028651	4.13251	7.11734e-07	1.32668e-05
Zm00001d023735	-2.33813	7.18694e-07	1.33877e-05
Zm00001d038020	-2.2259	7.19797e-07	1.33994e-05
Zm00001d003929	8.16221	7.27172e-07	1.35278e-05
Zm00001d004916	2.94302	7.27858e-07	1.35317e-05
Zm00001d024004	-2.67028	7.28822e-07	1.35318e-05
Zm00001d020595	-1.81373	7.2869e-07	1.35318e-05
Zm00001d015420	-2.19698	7.37082e-07	1.36635e-05
Zm00001d003186	7.99814	7.38042e-07	1.36635e-05
Zm00001d019358	1.76084	7.38332e-07	1.36635e-05
Zm00001d028606	1.70992	7.38194e-07	1.36635e-05
Zm00001d032653	7.99207	7.36766e-07	1.36635e-05
Zm00001d031161	5.5352	7.4309e-07	1.37425e-05
Zm00001d014701	-2.55282	7.72539e-07	1.43388e-05
Zm00001d005624	-1.95727	7.79887e-07	1.44136e-05
Zm00001d018631	2.61481	7.92648e-07	1.46399e-05
Zm00001d046154	7.97364	8.05145e-07	1.4861e-05
Zm00001d021425	7.97671	8.09575e-07	1.4933e-05
Zm00001d046530	-1.72771	8.11733e-07	1.49461e-05
Zm00001d006320	1.73963	8.11869e-07	1.49461e-05
Zm00001d051194	-2.93086	8.1166e-07	1.49461e-05
Zm00001d015599	1.70442	8.13577e-07	1.49581e-05
Zm00001d047252	-2.01217	8.13111e-07	1.49581e-05
Zm00001d046364	2.08438	8.19296e-07	1.50534e-05
Zm00001d051658	3.91746	8.22633e-07	1.51049e-05
Zm00001d012175	2.2669	8.24314e-07	1.5126e-05
Zm00001d005219	5.51501	8.24581e-07	1.51761e-05
Zm00001d025860	-1.89569	8.33755e-07	1.52784e-05
Zm00001d042641	-2.62224	8.33596e-07	1.52784e-05
Zm00001d019432	1.71073	8.34239e-07	1.52784e-05
Zm00001d002085	1.69792	8.36613e-07	1.53119e-05
Zm00001d041214	-2.1753	8.39004e-07	1.53446e-05
Zm00001d052667	3.24277	8.39485e-07	1.53446e-05
Zm00001d039670	1.73213	8.4208e-07	1.53821e-05
Zm00001d043547	2.83463	8.47816e-07	1.54769e-05
Zm00001d051504	1.84232	8.64873e-07	1.57781e-05
Zm00001d010735	8.06043	8.79352e-07	1.60229e-05
Zm00001d033893	-1.75842	8.79425e-07	1.60229e-05
Zm00001d020985	4.86081	8.84631e-07	1.61074e-05
Zm00001d010702	-1.71065	8.87666e-07	1.61522e-05
Zm00001d014726	1.71592	8.96044e-07	1.62942e-05
Zm00001d013333	4.64734	8.99366e-07	1.63441e-05
Zm00001d053843	-2.88937	9.04538e-07	1.64275e-05
Zm00001d047522	1.70445	9.12586e-07	1.6563e-05
Zm00001d008744	1.69643	9.13239e-07	1.65642e-05
Zm00001d052194	3.89899	9.3017e-07	1.68497e-05
Zm00001d052545	3.28239	9.2973e-07	1.68497e-05
Zm00001d048770	2.63431	9.38087e-07	1.69823e-05
Zm00001d012629	2.90256	9.35902e-07	1.70924e-05
Zm00001d027613	-1.85807	9.48425e-07	1.71482e-05
Zm00001d011835	2.0863	9.48469e-07	1.71482e-05
Zm00001d010049	4.69843	9.74084e-07	1.76001e-05
Zm00001d017782	-2.02088	9.80051e-07	1.76966e-05
Zm00001d003544	5.25167	9.81087e-07	1.7704e-05
Zm00001d019057	-2.62684	9.84227e-07	1.77493e-05
Zm00001d033985	-1.79935	9.90614e-07	1.78531e-05
Zm00001d034564	-1.72676	1.00131e-06	1.80123e-05
Zm00001d019957	-3.18885	1.00013e-06	1.80123e-05
Zm00001d038699	-2.30004	1.00136e-06	1.80123e-05
Zm00001d036521	-1.7355	1.00484e-06	1.80636e-05
Zm00001d032358	-2.42545	1.0149e-06	1.82328e-05
Zm00001d044103	2.02044	1.02704e-06	1.84392e-05
Zm00001d005881	-1.8529	1.03468e-06	1.85645e-05
Zm00001d006679	1.70613	1.04966e-06	1.88213e-05
Zm00001d023603	-3.75635	1.05491e-06	1.89035e-05
Zm00001d046981	2.61576	1.07325e-06	1.92199e-05
Zm00001d038648	1.8655	1.09163e-06	1.95366e-05
Zm00001d010662	2.41443	1.0944e-06	1.95739e-05
Zm00001d021576	5.25091	1.09808e-06	1.96273e-05
Zm00001d027323	1.72072	1.10861e-06	1.9803e-05
Zm00001d028713	1.80726	1.12357e-06	2.00577e-05
Zm00001d008258	2.97424	1.14643e-06	2.04528e-05
Zm00001d052185	1.78771	1.14988e-06	2.05014e-05
Zm00001d034678	5.27004	1.15629e-06	2.06027e-05
Zm00001d020549	2.26687	1.16457e-06	2.07372e-05
Zm00001d014780	1.95475	1.17664e-06	2.09389e-05
Zm00001d018464	-1.76516	1.19455e-06	2.12442e-05
Zm00001d046354	-1.88929	1.20118e-06	2.13487e-05
Zm00001d010244	1.77222	1.20576e-06	2.14166e-05
Zm00001d027760	8.34293	1.21478e-06	2.15632e-05
Zm00001d042830	-2.16231	1.21736e-06	2.15956e-05
Zm00001d038484	3.42516	1.21926e-06	2.16156e-05
Zm00001d012712	8.13222	1.23248e-06	2.18364e-05
Zm00001d050737	1.93858	1.24552e-06	2.20536e-05
Zm00001d034760	1.66494	1.25846e-06	2.22687e-05
Zm00001d017249	2.67287	1.2651e-06	2.23722e-05
Zm00001d051981	2.01934	1.27167e-06	2.24744e-05
Zm00001d038971	2.38826	1.27448e-06	2.251e-05
Zm00001d006078	3.54346	1.28289e-06	2.26444e-05
Zm00001d034345	-1.92426	1.30643e-06	2.30455e-05
Zm00001d044812	-3.50074	1.33395e-06	2.35163e-05
Zm00001d018598	-1.6962	1.34217e-06	2.36464e-05
Zm00001d010855	1.67403	1.34732e-06	2.37224e-05
Zm00001d013276	-2.2452	1.36621e-06	2.40401e-05
Zm00001d038804	1.7346	1.37429e-06	2.41672e-05
Zm00001d041804	-1.68683	1.37543e-06	2.41722e-05
Zm00001d040242	-1.667	1.38185e-06	2.42699e-05
Zm00001d048547	2.15449	1.3844e-06	2.42995e-05
Zm00001d040154	1.78564	1.44796e-06	2.53995e-05
Zm00001d020789	4.15984	1.46395e-06	2.5664e-05
Zm00001d025977	1.77854	1.47034e-06	2.57442e-05
Zm00001d015627	8.08313	1.47019e-06	2.57442e-05
Zm00001d046936	1.68928	1.49611e-06	2.61791e-05
Zm00001d043411	3.86724	1.49796e-06	2.61954e-05
Zm00001d037970	1.75053	1.5015e-06	2.6241e-05
Zm00001d011434	5.21268	1.50434e-06	2.62744e-05
Zm00001d027436	2.12039	1.51328e-06	2.64142e-05
Zm00001d037521	1.72257	1.5174e-06	2.64698e-05
Zm00001d049092	-2.04708	1.52642e-06	2.66107e-05
Zm00001d046786	-1.70166	1.54716e-06	2.69556e-05
Zm00001d024527	2.04463	1.55159e-06	2.70163e-05
Zm00001d053172	1.73237	1.55781e-06	2.71078e-05
Zm00001d017696	3.89468	1.57357e-06	2.73652e-05
Zm00001d012610	1.9968	1.57632e-06	2.73795e-05
Zm00001d035963	6.06332	1.57633e-06	2.73795e-05
Zm00001d039667	-1.87304	1.6371e-06	2.84001e-05
Zm00001d037243	-2.30476	1.64034e-06	2.8439e-05
Zm00001d039131	-1.76769	1.66081e-06	2.87761e-05
Zm00001d052738	2.25235	1.66834e-06	2.8889e-05
Zm00001d051389	5.17862	1.67066e-06	2.89114e-05
Zm00001d005657	-2.22562	1.69278e-06	2.92763e-05
Zm00001d012036	-2.17219	1.70947e-06	2.95468e-05
Zm00001d047829	3.09296	1.72438e-06	2.97864e-05
Zm00001d018467	-2.09894	1.73544e-06	2.99591e-05
Zm00001d033516	-4.88237	1.74844e-06	3.00069e-05
Zm00001d014867	-1.68659	1.77196e-06	3.05708e-05
Zm00001d009932	3.96496	1.78857e-06	3.08387e-05
Zm00001d021680	2.00188	1.79513e-06	3.09328e-05
Zm00001d002704	1.66212	1.79753e-06	3.09554e-05
Zm00001d033995	-1.76175	1.80325e-06	3.1035e-05
Zm00001d017767	-1.73113	1.80562e-06	3.10569e-05
Zm00001d029126	-1.88666	1.81317e-06	3.11677e-05
Zm00001d026489	2.11687	1.81655e-06	3.1207e-05
Zm00001d004545	2.56843	1.83478e-06	3.13001e-05
Zm00001d027558	1.64884	1.83403e-06	3.1488e-05
Zm00001d008800	3.92653	1.84546e-06	3.16651e-05
Zm00001d038270	-2.35614	1.8505e-06	3.17323e-05
Zm00001d026383	-2.33524	1.85727e-06	3.18291e-05
Zm00001d052683	-5.74639	1.85887e-06	3.18372e-05
Zm00001d053211	1.70472	1.88547e-06	3.22644e-05
Zm00001d044700	2.62214	1.88609e-06	3.22644e-05
Zm00001d008468	3.51082	1.90204e-06	3.25176e-05
Zm00001d027982	-1.63915	1.92859e-06	3.29516e-05
Zm00001d026490	1.68548	1.93111e-06	3.29746e-05
Zm00001d010822	-1.93753	1.93568e-06	3.30327e-05
Zm00001d015905	-2.67912	1.96778e-06	3.35603e-05
Zm00001d023480	4.81753	1.9825e-06	3.37706e-05
Zm00001d028006	1.71859	1.98137e-06	3.37706e-05
Zm00001d019445	7.79987	1.99638e-06	3.39865e-05
Zm00001d033710	4.63828	2.00793e-06	3.41626e-05
Zm00001d003099	3.69451	2.05329e-06	3.49134e-05
Zm00001d027676	1.698	2.07315e-06	3.52298e-05
Zm00001d022613	-4.54694	2.07708e-06	3.52754e-05
Zm00001d004366	3.53873	2.12773e-06	3.61139e-05
Zm00001d052253	2.01564	2.13126e-06	3.61522e-05
Zm00001d040448,Zm00001d040449	1.89167	2.13843e-06	3.62343e-05
Zm00001d039330	1.9835	2.13866e-06	3.62343e-05
Zm00001d026148	-1.69271	2.14048e-06	3.62434e-05
Zm00001d012834	1.88183	2.14582e-06	3.63119e-05
Zm00001d042216	1.6639	2.18158e-06	3.68731e-05
Zm00001d033772	7.79298	2.18141e-06	3.68731e-05
Zm00001d021492	2.86686	2.18815e-06	3.69619e-05
Zm00001d044833	3.35639	2.20533e-06	3.72299e-05
Zm00001d008567	1.64242	2.23806e-06	3.77374e-05
Zm00001d025035	1.85362	2.24858e-06	3.78922e-05
Zm00001d002129	-1.65957	2.28041e-06	3.84057e-05
Zm00001d013468	-3.42343	2.29863e-06	3.86895e-05
Zm00001d007381	2.98512	2.30274e-06	3.87355e-05
Zm00001d000164	-1.74071	2.35148e-06	3.9532e-05
Zm00001d018691	2.8969	2.37856e-06	3.96036e-05
Zm00001d002350	-1.74281	2.37846e-06	3.99581e-05
Zm00001d032058	-2.63781	2.37965e-06	3.99581e-05
Zm00001d013153	4.15473	2.38401e-06	4.00075e-05
Zm00001d010269	1.93697	2.40678e-06	4.03657e-05
Zm00001d020877	-1.69187	2.42432e-06	4.06358e-05
Zm00001d049940	1.67153	2.43552e-06	4.0787e-05
Zm00001d033623	2.33761	2.43623e-06	4.0787e-05
Zm00001d047814	1.69713	2.44925e-06	4.09807e-05
Zm00001d021634	-1.6676	2.45382e-06	4.10329e-05
Zm00001d016826	-1.62027	2.48233e-06	4.14852e-05
Zm00001d012383	5.86519	2.49202e-06	4.15979e-05
Zm00001d021727	4.40243	2.49092e-06	4.15979e-05
Zm00001d002261	1.65976	2.50976e-06	4.18694e-05
Zm00001d034194	-1.66027	2.51556e-06	4.19413e-05
Zm00001d020251	2.73525	2.53043e-06	4.21645e-05
Zm00001d002984	5.23947	2.53944e-06	4.22897e-05
Zm00001d029251	-1.77483	2.54648e-06	4.23819e-05
Zm00001d006753	5.98602	2.55045e-06	4.24229e-05
Zm00001d026126	3.79072	2.56077e-06	4.25696e-05
Zm00001d031351	2.04401	2.56502e-06	4.26152e-05
Zm00001d007403	-2.06782	2.60132e-06	4.3193e-05
Zm00001d002396	-2.30526	2.64462e-06	4.38862e-05
Zm00001d040461	4.95807	2.67894e-06	4.44295e-05
Zm00001d042395	1.74387	2.70466e-06	4.48298e-05
Zm00001d032561	2.83227	2.73269e-06	4.52679e-05
Zm00001d048100	1.61035	2.76136e-06	4.57161e-05
Zm00001d040627	-3.22445	2.77144e-06	4.5807e-05
Zm00001d008488	2.1312	2.77171e-06	4.5807e-05
Zm00001d046773	5.23212	2.77101e-06	4.5807e-05
Zm00001d010965	4.2213	2.816e-06	4.65116e-05
Zm00001d016918	1.73257	2.82467e-06	4.66277e-05
Zm00001d030858	7.82079	2.83626e-06	4.67861e-05
Zm00001d021699	3.4852	2.83758e-06	4.67861e-05
Zm00001d035082	7.77845	2.89877e-06	4.77673e-05
Zm00001d052170	1.78012	2.93331e-06	4.83083e-05
Zm00001d043943	-3.50555	2.95373e-06	4.86163e-05
Zm00001d019311	1.6914	2.95698e-06	4.86413e-05
Zm00001d007624	3.64654	2.95984e-06	4.86601e-05
Zm00001d046346	5.84428	2.96727e-06	4.8754e-05
Zm00001d027581	-1.89565	2.97013e-06	4.87726e-05
Zm00001d012477	3.89133	2.99606e-06	4.91698e-05
Zm00001d035759	-1.77106	3.00769e-06	4.9332e-05
Zm00001d039468	-2.25787	3.04255e-06	4.9875e-05
Zm00001d005790	2.21869	3.05682e-06	5.00797e-05
Zm00001d043393	5.91637	3.11571e-06	5.10151e-05
Zm00001d022607	3.01254	3.11883e-06	5.10365e-05
Zm00001d044230	-2.32409	3.16229e-06	5.17178e-05
Zm00001d011349	1.67558	3.17354e-06	5.18719e-05
Zm00001d012929	1.78867	3.17577e-06	5.18782e-05
Zm00001d021959	6.016	3.19972e-06	5.22393e-05
Zm00001d017204	-4.48072	3.20279e-06	5.22593e-05
Zm00001d013317	1.63413	3.21567e-06	5.24392e-05
Zm00001d033707	1.70185	3.24376e-06	5.28625e-05
Zm00001d032132	-3.74672	3.24537e-06	5.28625e-05
Zm00001d049713	3.11181	3.32966e-06	5.42043e-05
Zm00001d048703	-1.82828	3.33995e-06	5.43405e-05
Zm00001d053569	-3.48753	3.37754e-06	5.4893e-05
Zm00001d003086	-1.73889	3.37779e-06	5.4893e-05
Zm00001d013130	-1.71644	3.4201e-06	5.55486e-05
Zm00001d017365	4.26589	3.46017e-06	5.61671e-05
Zm00001d037854	5.12806	3.48716e-06	5.65729e-05
Zm00001d028103	4.7407	3.49596e-06	5.6683e-05
Zm00001d020017	3.08013	3.52175e-06	5.70504e-05
Zm00001d025827	-1.61091	3.52265e-06	5.70504e-05
Zm00001d034237	1.8292	3.54046e-06	5.72975e-05
Zm00001d009118	-2.46798	3.54196e-06	5.72975e-05
Zm00001d031258	-1.83898	3.55942e-06	5.7547e-05
Zm00001d008570	4.60295	3.61585e-06	5.84259e-05
Zm00001d023479	1.94033	3.63375e-06	5.86817e-05
Zm00001d031751	4.07843	3.64095e-06	5.87644e-05
Zm00001d019507	-1.89219	3.65877e-06	5.90083e-05
Zm00001d028371	-1.83226	3.66024e-06	5.90083e-05
Zm00001d043302	5.56261	3.68412e-06	5.93247e-05
Zm00001d026197	7.81695	3.6881e-06	5.93247e-05
Zm00001d010743	2.14483	3.68825e-06	5.93247e-05
Zm00001d037354	2.27331	3.68757e-06	5.93247e-05
Zm00001d016707	-1.75284	3.69356e-06	5.93762e-05
Zm00001d046236	3.42986	3.70328e-06	5.94986e-05
Zm00001d010693	-2.33563	3.71386e-06	5.96347e-05
Zm00001d018161	-1.79254	3.72116e-06	5.9718e-05
Zm00001d032253	1.74205	3.72886e-06	5.98077e-05
Zm00001d018059	2.40423	3.7313e-06	5.98129e-05
Zm00001d000230	-1.65373	3.73443e-06	5.98292e-05
Zm00001d003492	3.21603	3.74183e-06	5.99138e-05
Zm00001d013319	-1.63408	3.83773e-06	6.14145e-05
Zm00001d041606	5.63977	3.8434e-06	6.14705e-05
Zm00001d038229	1.69092	3.85628e-06	6.16417e-05
Zm00001d038451	4.90423	3.88103e-06	6.20022e-05
Zm00001d045567	-2.21142	3.89622e-06	6.22096e-05
Zm00001d012197	1.66589	3.90071e-06	6.22463e-05
Zm00001d045063	3.9587	3.90663e-06	6.23055e-05
Zm00001d011297	-3.03689	3.91432e-06	6.2393e-05
Zm00001d010197	2.55902	3.94138e-06	6.27889e-05
Zm00001d013741	-1.6043	3.94709e-06	6.28445e-05
Zm00001d043771	-1.69967	3.97602e-06	6.32695e-05
Zm00001d018966	3.08777	4.01726e-06	6.38898e-05
Zm00001d035553	4.92369	4.02983e-06	6.40176e-05
Zm00001d020008	-3.6253	4.07265e-06	6.46615e-05
Zm00001d013348	-1.6028	4.08563e-06	6.48313e-05
Zm00001d036122	2.77664	4.09234e-06	6.49013e-05
Zm00001d011133	2.61122	4.12003e-06	6.53039e-05
Zm00001d032230	-2.16724	4.12469e-06	6.53411e-05
Zm00001d005506	4.14679	4.13967e-06	6.55416e-05
Zm00001d001769	4.96527	4.15759e-06	6.57517e-05
Zm00001d019752	5.5421	4.15754e-06	6.57517e-05
Zm00001d037757	-2.68209	4.16612e-06	6.58499e-05
Zm00001d017989	4.35405	4.19115e-06	6.62085e-05
Zm00001d052357	2.11585	4.19372e-06	6.62121e-05
Zm00001d044430,Zm00001d044431	1.69019	4.20915e-06	6.64185e-05
Zm00001d009613	-1.64738	4.21987e-06	6.65505e-05
Zm00001d032045	2.93988	4.25915e-06	6.71326e-05
Zm00001d043860	-1.69649	4.26377e-06	6.7168e-05
Zm00001d039644	2.15016	4.27925e-06	6.73744e-05
Zm00001d003164	8.241	4.29045e-06	6.74449e-05
Zm00001d050293	2.31392	4.29088e-06	6.74449e-05
Zm00001d034197	3.87337	4.28622e-06	6.74449e-05
Zm00001d003301	3.68388	4.30499e-06	6.7629e-05
Zm00001d010319	1.94418	4.33369e-06	6.78333e-05
Zm00001d048645	7.69163	4.32239e-06	6.78646e-05
Zm00001d009858	1.62811	4.43123e-06	6.95349e-05
Zm00001d038180	5.29027	4.43797e-06	6.9602e-05
Zm00001d052122	2.76478	4.45805e-06	6.98782e-05
Zm00001d021583	2.77704	4.47591e-06	7.01193e-05
Zm00001d049910	1.62333	4.52393e-06	7.08323e-05
Zm00001d049260	1.58862	4.54857e-06	7.11788e-05
Zm00001d016274	-1.84451	4.59506e-06	7.18664e-05
Zm00001d046112	-1.78618	4.61631e-06	7.21588e-05
Zm00001d012159	-2.01621	4.62829e-06	7.23062e-05
Zm00001d011679	2.51523	4.6398e-06	7.2446e-05
Zm00001d037894	8.74516	4.66396e-06	7.2783e-05
Zm00001d017282	2.1264	4.68591e-06	7.30449e-05
Zm00001d006591	3.98562	4.71506e-06	7.31193e-05
Zm00001d034263	-2.31394	4.69847e-06	7.32003e-05
Zm00001d034705	-1.57484	4.71009e-06	7.33409e-05
Zm00001d027298	-1.64223	4.72814e-06	7.35815e-05
Zm00001d032868	7.68791	4.78052e-06	7.43557e-05
Zm00001d033666	-1.6081	4.80597e-06	7.47105e-05
Zm00001d032098	-1.61637	4.82463e-06	7.49594e-05
Zm00001d024621	2.9565	4.8433e-06	7.52081e-05
Zm00001d014136	7.10097	4.90461e-06	7.61184e-05
Zm00001d026665	2.09295	4.92681e-06	7.6421e-05
Zm00001d043299	-1.62317	4.95567e-06	7.68265e-05
Zm00001d011461	-1.59717	5.09302e-06	7.88555e-05
Zm00001d009480	5.16469	5.09333e-06	7.88555e-05
Zm00001d039076	-1.81121	5.09492e-06	7.88555e-05
Zm00001d030171	2.0612	5.10937e-06	7.9036e-05
Zm00001d044138	-2.07253	5.11247e-06	7.90406e-05
Zm00001d029703	5.51229	5.1777e-06	8.00054e-05
Zm00001d018348	-1.72516	5.22952e-06	8.07619e-05
Zm00001d013532	-2.04515	5.25053e-06	8.10422e-05
Zm00001d029234	-1.75642	5.26973e-06	8.12942e-05
Zm00001d042529	4.73841	5.29007e-06	8.15634e-05
Zm00001d015186	1.93537	5.30843e-06	8.18019e-05
Zm00001d039567	2.34301	5.35798e-06	8.24755e-05
Zm00001d043890	1.99249	5.41001e-06	8.32311e-05
Zm00001d048802	-1.63754	5.41438e-06	8.32531e-05
Zm00001d036402	2.47386	5.42448e-06	8.3363e-05
Zm00001d053702	5.03836	5.44617e-06	8.36509e-05
Zm00001d013862	1.62869	5.48773e-06	8.42435e-05
Zm00001d040637	-3.14623	5.5034e-06	8.43924e-05
Zm00001d001929	3.63813	5.50096e-06	8.43924e-05
Zm00001d035456	-1.56446	5.50954e-06	8.44407e-05
Zm00001d017461	3.9427	5.53195e-06	8.47384e-05
Zm00001d053952	2.63512	5.63505e-06	8.62709e-05
Zm00001d002423	-1.63115	5.64391e-06	8.63597e-05
Zm00001d028561	5.85973	5.66106e-06	8.65753e-05
Zm00001d048968	-4.57098	5.67402e-06	8.67266e-05
Zm00001d012307	-2.18799	5.71963e-06	8.73765e-05
Zm00001d020614	-1.76911	5.74442e-06	8.77079e-05
Zm00001d039840	-1.8308	5.75124e-06	8.77514e-05
Zm00001d007477	2.54291	5.75348e-06	8.77514e-05
Zm00001d007858	-1.55852	5.76505e-06	8.78805e-05
Zm00001d004329	-2.09756	5.78897e-06	8.81975e-05
Zm00001d031678	5.72395	5.8741e-06	8.94463e-05
Zm00001d022059	3.65408	5.89741e-06	8.97529e-05
Zm00001d020826	-3.13485	5.90349e-06	8.97972e-05
Zm00001d003559	-2.03319	5.91616e-06	8.99415e-05
Zm00001d041819	-1.59968	5.93899e-06	9.02401e-05
Zm00001d045839	1.7347	5.94361e-06	9.02618e-05
Zm00001d036738	-1.55591	5.96481e-06	9.05351e-05
Zm00001d018466	-1.65954	5.96981e-06	9.05625e-05
Zm00001d038850	-1.69892	5.99311e-06	9.08671e-05
Zm00001d030148	1.64177	6.00177e-06	9.09496e-05
Zm00001d044323	2.46298	6.04637e-06	9.15122e-05
Zm00001d020148	1.95844	6.0486e-06	9.15122e-05
Zm00001d008308	2.04627	6.04597e-06	9.15122e-05
Zm00001d036261	3.9108	6.07717e-06	9.18953e-05
Zm00001d045519	-1.79117	6.08142e-06	9.19104e-05
Zm00001d025519	2.87411	6.08594e-06	9.19295e-05
Zm00001d006106	1.72683	6.12866e-06	9.25255e-05
Zm00001d014166	3.41389	6.16878e-06	9.30815e-05
Zm00001d033874	-1.60785	6.1726e-06	9.30894e-05
Zm00001d042727	-1.60374	6.17993e-06	9.31502e-05
Zm00001d040035	5.07115	6.3174e-06	9.51716e-05
Zm00001d041258	2.55909	6.34267e-06	9.55015e-05
Zm00001d029723	1.70057	6.41442e-06	9.65303e-05
Zm00001d022230	-1.62496	6.4487e-06	9.69946e-05
Zm00001d029373	-1.92072	6.51412e-06	9.79264e-05
Zm00001d046827	5.02678	6.52417e-06	9.79734e-05
Zm00001d043267	1.54445	6.5233e-06	9.79734e-05
Zm00001d026554	3.14019	6.58301e-06	9.88046e-05
Zm00001d018133	1.91156	6.59458e-06	9.89258e-05
Zm00001d010639	1.55901	6.73916e-06	0.000100987
Zm00001d036999	3.26636	6.73666e-06	0.000100987
Zm00001d022506	4.16064	6.75229e-06	0.000101131
Zm00001d025228	-1.658	6.76341e-06	0.000101243
Zm00001d013595	-3.278	6.94987e-06	0.00010398
Zm00001d016301	-1.93371	6.99874e-06	0.000104655
Zm00001d018247	-2.10679	7.00987e-06	0.000104724
Zm00001d033457	-1.78116	7.01076e-06	0.000104724
Zm00001d001862	2.62833	7.02323e-06	0.000104855
Zm00001d019034	1.6578	7.05462e-06	0.000105268
Zm00001d033917	-1.55515	7.05844e-06	0.00010527
Zm00001d005174	-2.20966	7.10623e-06	0.000105927
Zm00001d052955	5.68989	7.15633e-06	0.000106586
Zm00001d051653	3.1301	7.158e-06	0.000106586
Zm00001d039181	-1.5621	7.1798e-06	0.000106854
Zm00001d009398	4.05461	7.18483e-06	0.000106873
Zm00001d023294	2.96611	7.29163e-06	0.000108404
Zm00001d030127	-1.65008	7.3185e-06	0.000108747
Zm00001d017869	-1.76879	7.32459e-06	0.00010878
Zm00001d016477	1.7649	7.3326e-06	0.000108842
Zm00001d021649	1.98066	7.35264e-06	0.000109082
Zm00001d011577	2.11774	7.36279e-06	0.000109176
Zm00001d017134	5.61657	7.38427e-06	0.000109437
Zm00001d032383	-1.64677	7.40527e-06	0.00010969
Zm00001d036541	1.58886	7.45914e-06	0.00011043
Zm00001d039574	5.42857	7.47324e-06	0.000110581
Zm00001d002816	7.54951	7.48735e-06	0.000110732
Zm00001d042049	-1.67955	7.51251e-06	0.000111046
Zm00001d020953	4.52198	7.5315e-06	0.000111269
Zm00001d021653	-1.86002	7.64742e-06	0.000112922
Zm00001d024291	1.63607	7.6916e-06	0.000113515
Zm00001d003174	2.08653	7.71486e-06	0.000113799
Zm00001d017482	-1.6232	7.72699e-06	0.000113919
Zm00001d002051	1.73768	7.74228e-06	0.000114085
Zm00001d037926	1.66058	7.79493e-06	0.000114792
Zm00001d040509	-2.23079	7.79843e-06	0.000114792
Zm00001d027685	5.46056	7.85101e-06	0.000115506
Zm00001d013655	-1.84037	7.8936e-06	0.000116073
Zm00001d035236	2.06931	7.92574e-06	0.000116484
Zm00001d043623	4.86395	7.93447e-06	0.000116552
Zm00001d038651	-2.67766	7.95469e-06	0.000116789
Zm00001d002871	-1.64534	7.95911e-06	0.000116793
Zm00001d019312	1.68321	8.06476e-06	0.000118282
Zm00001d014778	-1.74905	8.11608e-06	0.000118973
Zm00001d018617	-2.48341	8.1364e-06	0.000119209
Zm00001d013367	-1.75935	8.14935e-06	0.000119337
Zm00001d016949	1.54565	8.16106e-06	0.000119446
Zm00001d030915	2.32307	8.19224e-06	0.000119841
Zm00001d019454	-1.55798	8.2549e-06	0.000120695
Zm00001d002650	-1.65359	8.27024e-06	0.000120823
Zm00001d002824	1.5527	8.27218e-06	0.000120823
Zm00001d023299	-4.42712	8.29139e-06	0.000121041
Zm00001d009150	1.53267	8.32264e-06	0.000121434
Zm00001d017770	-1.60233	8.38103e-06	0.000122223
Zm00001d043601	1.53359	8.42237e-06	0.000122762
Zm00001d030348	1.65118	8.5018e-06	0.000123802
Zm00001d025015	-1.629	8.50244e-06	0.000123802
Zm00001d023720	3.3881	8.60087e-06	0.000125171
Zm00001d046553	-1.93631	8.62225e-06	0.000125417
Zm00001d045397	1.65917	8.67014e-06	0.000126049
Zm00001d029482	-1.58989	8.7417e-06	0.000127024
Zm00001d007697	4.64408	8.83098e-06	0.000127568
Zm00001d026056	1.85981	8.81449e-06	0.000128016
Zm00001d034779	-1.65899	8.8993e-06	0.000129181
Zm00001d028161	-2.95405	8.9148e-06	0.00012934
Zm00001d000017	4.39728	8.92342e-06	0.000129399
Zm00001d038992	7.49878	8.97024e-06	0.000130011
Zm00001d029468	5.34342	8.98583e-06	0.00013017
Zm00001d011943	1.57513	9.04365e-06	0.000130941
Zm00001d006446	-2.05607	9.20709e-06	0.000133239
Zm00001d013502	5.37308	9.31377e-06	0.000134714
Zm00001d044785	-1.79072	9.37764e-06	0.000135568
Zm00001d018447	2.28233	9.6097e-06	0.000138852
Zm00001d048602	3.11996	9.63332e-06	0.000139122
Zm00001d008242	2.27218	9.6552e-06	0.000139367
Zm00001d005749	4.59287	9.67309e-06	0.000139554
Zm00001d021461	6.19804	9.74201e-06	0.000140477
Zm00001d011823	2.95644	9.7658e-06	0.000140748
Zm00001d015579	-1.65824	9.77372e-06	0.00014079
Zm00001d020692	2.52807	9.827e-06	0.000141486
Zm00001d011813	-1.54892	9.8829e-06	0.000142218
Zm00001d009794	3.54675	1.00088e-05	0.000142986
Zm00001d033271	7.58262	1.01093e-05	0.000145402
Zm00001d011585	-1.74111	1.01975e-05	0.000146597
Zm00001d017992	2.78188	1.02535e-05	0.000147326
Zm00001d002374	3.319	1.0396e-05	0.000148145
Zm00001d039913	-2.42146	1.0414e-05	0.000149557
Zm00001d023459	2.64572	1.04737e-05	0.000150338
Zm00001d020887	4.82186	1.05228e-05	0.000150736
Zm00001d011256	-1.49863	1.05087e-05	0.000150736
Zm00001d011076	2.70423	1.05182e-05	0.000150736
Zm00001d028687	1.58642	1.05214e-05	0.000150736
Zm00001d027901	2.03364	1.05662e-05	0.000151281
Zm00001d007267	-1.59638	1.05963e-05	0.000151635
Zm00001d045261	-1.56559	1.06085e-05	0.000151734
Zm00001d049173	2.40513	1.06178e-05	0.00015179
Zm00001d019124	-1.55368	1.06434e-05	0.000152078
Zm00001d003023	2.53539	1.07018e-05	0.000152835
Zm00001d018342	1.55015	1.07072e-05	0.000152835
Zm00001d032467,Zm00001d032468	2.76301	1.07332e-05	0.000153129
Zm00001d051915	-1.58992	1.08049e-05	0.000154074
Zm00001d018488	-1.50728	1.08706e-05	0.000154933
Zm00001d002028	1.55662	1.0894e-05	0.000155188
Zm00001d006069	3.79802	1.09088e-05	0.000155321
Zm00001d051609	-1.6976	1.10272e-05	0.000156928
Zm00001d003129	1.55329	1.11128e-05	0.000158066
Zm00001d028968	2.77261	1.11253e-05	0.000158165
[truncated: 3,107 more rows]
[truncated: 4 more columns]
