# Supplementary material for: Multi-Omics Analyses Reveal the Regulatory Network and the Function of ZmUGTs in Maize Defense Response
Source: Front Plant Sci. 2021 Sep 24;12:738261. doi: 10.3389/fpls.2021.738261 (PMC8497902; doi:10.3389/fpls.2021.738261)
Supplement: Supplementary file 4 [file Table_3.XLSX]

## Sheet: 22℃
Supplementary Table S3. The transcription factors predicted to bind to the promoters of DEGs identified at 48 h post temperature shift and at constant 22 ℃.
TFs	TF type	Targets	Start (bp)	End (bp)	Chain	P-value	Binding site	Species
Zm00001d044162	WRKY28	Zm00001d001900	259	271	-	3.82e-06	TTGTTTGACTTTT	Zea mays
Zm00001d044162	WRKY28	Zm00001d002085	157	169	-	9.59e-06	GCGTTTGACTTTT	Zea mays
Zm00001d044162	WRKY28	Zm00001d002436	16	28	-	2.84e-06	GTTGTTGACTTTA	Zea mays
Zm00001d044162	WRKY28	Zm00001d002993	79	91	-	1.4e-06	TACGTTGACTTTA	Zea mays
Zm00001d044162	WRKY28	Zm00001d003197	274	286	-	9.91e-07	AGAGTTGACTTTT	Zea mays
Zm00001d044162	WRKY28	Zm00001d003249	157	169	+	5.68e-06	TGATTTGACTTTT	Zea mays
Zm00001d044162	WRKY28	Zm00001d003352	104	116	+	5.16e-06	TAATTTGACTTTT	Zea mays
Zm00001d044162	WRKY28	Zm00001d004908	209	221	-	1.3e-06	ACCTTTGACTTTT	Zea mays
Zm00001d044162	WRKY28	Zm00001d005375	246	258	-	3.25e-07	GTTGTTGACTTTT	Zea mays
Zm00001d044162	WRKY28	Zm00001d005504	254	266	-	2.96e-06	GTATTTGACTTTT	Zea mays
Zm00001d044162	WRKY28	Zm00001d005547	75	87	+	9.59e-06	GCGTTTGACTTTT	Zea mays
Zm00001d044162	WRKY28	Zm00001d005823	229	241	+	3.7e-06	AAATTTGACTTTT	Zea mays
Zm00001d044162	WRKY28	Zm00001d006825	271	283	-	2.03e-06	ATCGTTGACTTCT	Zea mays
Zm00001d044162	WRKY28	Zm00001d007180	83	95	-	4.55e-06	ACTTTTGACTTTT	Zea mays
Zm00001d044162	WRKY28	Zm00001d007959	298	310	-	2.71e-06	ATGTTTGACTTTT	Zea mays
Zm00001d044162	WRKY28	Zm00001d009106	143	155	-	8.13e-06	AGAGTTGACTATT	Zea mays
Zm00001d044162	WRKY28	Zm00001d009799	87	99	+	9.74e-06	GATTTTGACTTTG	Zea mays
Zm00001d044162	WRKY28	Zm00001d010171	123	135	+	3.62e-06	TATTTTGACTTTT	Zea mays
Zm00001d044162	WRKY28	Zm00001d010448	201	213	-	7.9e-06	TTAGTTGACCTTT	Zea mays
Zm00001d044162	WRKY28	Zm00001d010945	303	315	-	8.6e-06	GGCGTTGACTTAG	Zea mays
Zm00001d044162	WRKY28	Zm00001d011157	442	454	-	1.04e-06	TGCTTTGACTTTT	Zea mays
Zm00001d044162	WRKY28	Zm00001d011419	225	237	-	3.02e-06	GACTTTGACTTTG	Zea mays
Zm00001d044162	WRKY28	Zm00001d011527	315	327	-	3.49e-06	GTGTTTGACTTTT	Zea mays
Zm00001d044162	WRKY28	Zm00001d012561	76	88	-	1.97e-07	ATCGTTGACTTTG	Zea mays
Zm00001d044162	WRKY28	Zm00001d012731	29	41	-	9.59e-06	GCGTTTGACTTTT	Zea mays
Zm00001d044162	WRKY28	Zm00001d013335	367	379	+	8.9e-06	TCATTTGACTTTT	Zea mays
Zm00001d044162	WRKY28	Zm00001d013845	144	156	+	6.75e-06	TTTTTTGACTTTG	Zea mays
Zm00001d044162	WRKY28	Zm00001d013934	386	398	+	3.21e-06	TTATTTGACTTTT	Zea mays
Zm00001d044162	WRKY28	Zm00001d014360	330	342	-	3.88e-07	ATAGTTGACTTTT	Zea mays
Zm00001d044162	WRKY28	Zm00001d014748	263	275	+	5.74e-06	TCCTTTGACTTTG	Zea mays
Zm00001d044162	WRKY28	Zm00001d014785	345	357	-	9.59e-06	GCGTTTGACTTTT	Zea mays
Zm00001d044162	WRKY28	Zm00001d014903	40	52	+	2.23e-06	TTTTTTGACTTTT	Zea mays
Zm00001d044162	WRKY28	Zm00001d015627	316	328	+	8.96e-06	AAAGTTGACCTTT	Zea mays
Zm00001d044162	WRKY28	Zm00001d016705	206	218	+	7.2e-06	GTTGTTGACTTGT	Zea mays
Zm00001d044162	WRKY28	Zm00001d017166	56	68	+	9.91e-07	AGAGTTGACTTTT	Zea mays
Zm00001d044162	WRKY28	Zm00001d018238	260	272	-	7.63e-06	ACGTTTGACTTTT	Zea mays
Zm00001d044162	WRKY28	Zm00001d018500	60	72	-	3.02e-06	TCGGTTGACTTTT	Zea mays
Zm00001d044162	WRKY28	Zm00001d019422	115	127	+	8.74e-07	AAAGTTGACTTTT	Zea mays
Zm00001d044162	WRKY28	Zm00001d021629	11	23	-	5.34e-06	GACATTGACTTTT	Zea mays
Zm00001d044162	WRKY28	Zm00001d022506	23	35	-	7.63e-06	ACGTTTGACTTTT	Zea mays
Zm00001d044162	WRKY28	Zm00001d023570	21	33	-	9.35e-07	TACTTTGACTTTT	Zea mays
Zm00001d044162	WRKY28	Zm00001d023625	364	376	-	6.61e-06	CACGTTGACTTTA	Zea mays
Zm00001d044162	WRKY28	Zm00001d024268	450	462	+	9.18e-06	ATGGTTGACTTGT	Zea mays
Zm00001d044162	WRKY28	Zm00001d027550	289	301	+	6.87e-06	AACTTTGACCTTT	Zea mays
Zm00001d044162	WRKY28	Zm00001d028477	208	220	+	5.25e-06	TTGGTTGACTTTA	Zea mays
Zm00001d044162	WRKY28	Zm00001d028667	147	159	+	2.84e-06	AGTTTTGACTTTT	Zea mays
Zm00001d044162	WRKY28	Zm00001d028988	303	315	+	8.9e-06	TCATTTGACTTTT	Zea mays
Zm00001d044162	WRKY28	Zm00001d029320	251	263	-	3.49e-06	GTGTTTGACTTTT	Zea mays
Zm00001d044162	WRKY28	Zm00001d029359	168	180	+	3.37e-06	GATTTTGACTTTT	Zea mays
Zm00001d044162	WRKY28	Zm00001d029373	391	403	-	4.77e-06	TTCTTTGACTTTC	Zea mays
Zm00001d044162	WRKY28	Zm00001d030581	369	381	+	5.25e-07	AACTTTGACTTTT	Zea mays
Zm00001d044162	WRKY28	Zm00001d031164	200	212	-	6.87e-06	ATATTTGACTTTG	Zea mays
Zm00001d044162	WRKY28	Zm00001d031381	270	282	+	4.19e-06	GTTGTTGACTATT	Zea mays
Zm00001d044162	WRKY28	Zm00001d034418	211	223	-	9.59e-06	GCGTTTGACTTTT	Zea mays
Zm00001d044162	WRKY28	Zm00001d035542	18	30	-	6.68e-06	TGGTTTGACTTTT	Zea mays
Zm00001d044162	WRKY28	Zm00001d037035	103	115	+	9.59e-06	GCGTTTGACTTTT	Zea mays
Zm00001d044162	WRKY28	Zm00001d037774	24	36	+	8.9e-06	TATGTTGACCTTT	Zea mays
Zm00001d044162	WRKY28	Zm00001d037916	343	355	-	8.13e-06	ATGTTTGACTTTG	Zea mays
Zm00001d044162	WRKY28	Zm00001d038648	232	244	-	5.96e-07	GACGTTGACTTTG	Zea mays
Zm00001d044162	WRKY28	Zm00001d041025	305	317	-	5e-06	GTCGTTGACTTAG	Zea mays
Zm00001d044162	WRKY28	Zm00001d042943	276	288	+	2.96e-06	GTATTTGACTTTT	Zea mays
Zm00001d044162	WRKY28	Zm00001d043462	291	303	-	5.16e-06	TAGGTTGACTTTG	Zea mays
Zm00001d044162	WRKY28	Zm00001d043713	192	204	-	9.34e-06	TTATTTGACTTTG	Zea mays
Zm00001d044162	WRKY28	Zm00001d043838	338	350	+	8.76e-06	GACTTTGACCTTT	Zea mays
Zm00001d044162	WRKY28	Zm00001d044024	372	384	-	8.27e-06	GCATTTGACTTTT	Zea mays
Zm00001d044162	WRKY28	Zm00001d044254	94	106	-	9.59e-06	GCGTTTGACTTTT	Zea mays
Zm00001d044162	WRKY28	Zm00001d045007	386	398	+	4.85e-06	CACTTTGACTTTT	Zea mays
Zm00001d044162	WRKY28	Zm00001d046625	138	150	+	5.68e-06	AACTTTGACTATT	Zea mays
Zm00001d044162	WRKY28	Zm00001d046746	57	69	-	4.47e-06	GTCTTTGACTATT	Zea mays
Zm00001d044162	WRKY28	Zm00001d047187	229	241	+	7.63e-06	ACGTTTGACTTTT	Zea mays
Zm00001d044162	WRKY28	Zm00001d048440	360	372	+	1.04e-06	TGCTTTGACTTTT	Zea mays
Zm00001d044162	WRKY28	Zm00001d048709	231	243	+	8.9e-06	TCATTTGACTTTT	Zea mays
Zm00001d044162	WRKY28	Zm00001d048741	389	401	+	5.91e-06	GCTTTTGACTTTT	Zea mays
Zm00001d044162	WRKY28	Zm00001d049303	10	22	-	1.32e-06	TAAGTTGACTTTT	Zea mays
Zm00001d044162	WRKY28	Zm00001d051761	424	436	-	7.06e-06	CCCGTTGACTTTG	Zea mays
Zm00001d044162	WRKY28	Zm00001d053179	163	175	+	5.16e-06	TAATTTGACTTTT	Zea mays
Zm00001d014507	ARF16	Zm00001d000123	345	365	-	8.62e-06	CTTACGTTTTTGATGAACCAA	Zea mays
Zm00001d014507	ARF16	Zm00001d000195	1	21	-	2.03e-06	TTGACGTTTTTTATTCAAAAA	Zea mays
Zm00001d014507	ARF16	Zm00001d002020	129	149	+	4.97e-06	TATATATTTTCTGTAAAAAAA	Zea mays
Zm00001d014507	ARF16	Zm00001d002277	241	261	+	7.11e-06	TTCAACGTTTCAGCGGGAAAA	Zea mays
Zm00001d014507	ARF16	Zm00001d002864	294	314	-	1.17e-06	TACTCGGTTTTGACGTAGAAA	Zea mays
Zm00001d014507	ARF16	Zm00001d003164	33	53	+	1.25e-06	AATACGTTTTTTGGTAAAAAA	Zea mays
Zm00001d014507	ARF16	Zm00001d003949	145	165	-	3.88e-06	TTTACGTTTATAAAGAGAAAT	Zea mays
Zm00001d014507	ARF16	Zm00001d004200	168	188	+	2.35e-06	CTTACATTTATGGGGAGGAAT	Zea mays
Zm00001d014507	ARF16	Zm00001d005504	314	334	-	4.03e-06	TTTTCAGTTTCGGTGATAAAA	Zea mays
Zm00001d014507	ARF16	Zm00001d006340	244	264	+	4.68e-07	TTAATTTTTTTAGCAAGAAAA	Zea mays
Zm00001d014507	ARF16	Zm00001d006688	88	108	+	2.83e-06	TTTTCGATATTTACACGAAAA	Zea mays
Zm00001d014507	ARF16	Zm00001d006795	356	376	-	6.25e-06	CAAGTGTTTTTGACTAGAAAA	Zea mays
Zm00001d014507	ARF16	Zm00001d006833	290	310	-	3.85e-06	TTTATTATTGATGGGGGAAAA	Zea mays
Zm00001d014507	ARF16	Zm00001d007167	46	66	+	9.28e-06	TTTAGAATTTTGATTAAAAAA	Zea mays
Zm00001d014507	ARF16	Zm00001d007301	312	332	-	7.5e-06	GTTTTTGTATTTGCGAAAAAA	Zea mays
Zm00001d014507	ARF16	Zm00001d007477	151	171	+	3.46e-06	CATGTGTTTTTTGCAGAAGAA	Zea mays
Zm00001d014507	ARF16	Zm00001d008394	315	335	-	7.16e-06	TTTGTTCTTTTGTCGGGAAGA	Zea mays
Zm00001d014507	ARF16	Zm00001d008567	150	170	-	5.9e-06	TTAGCTATTTTTGTATGAAAA	Zea mays
Zm00001d014507	ARF16	Zm00001d009150	18	38	+	9.38e-06	TTGATGTTTTTGGTGAAATGA	Zea mays
Zm00001d014507	ARF16	Zm00001d009365	160	180	-	5.39e-06	TTTAATTTTTTGGAGAAAAAA	Zea mays
Zm00001d014507	ARF16	Zm00001d009666	289	309	+	7.61e-06	TTTATTTTTTTAAGAAAAAAT	Zea mays
Zm00001d014507	ARF16	Zm00001d009936	78	98	+	4.7e-06	TTTATTTTTTTAGCTAGGAGA	Zea mays
Zm00001d014507	ARF16	Zm00001d010269	195	215	+	6.56e-06	TTTTTATTTGTAACGTAAAAA	Zea mays
Zm00001d014507	ARF16	Zm00001d010448	291	311	-	6.21e-06	TTAGTTTTTTCGACAGAAAAT	Zea mays
Zm00001d014507	ARF16	Zm00001d010743	71	91	-	7.11e-06	TTTCTATTTTTTATAGGAAAA	Zea mays
Zm00001d014507	ARF16	Zm00001d011643	73	93	+	7.11e-06	TTTAAGGTTTTGGCTGAAGGT	Zea mays
Zm00001d014507	ARF16	Zm00001d011958	38	58	+	2.13e-06	ATTATTATTTTTGTAAGAAAA	Zea mays
Zm00001d014507	ARF16	Zm00001d012337	469	489	+	1.63e-06	TTTTCATTTTAGGCCAGAATA	Zea mays
Zm00001d014507	ARF16	Zm00001d013046	136	156	+	4.2e-06	GATATGGGTATGGCGAAGAAA	Zea mays
Zm00001d014507	ARF16	Zm00001d013348	325	345	+	8.29e-06	ATTATGTTTTTGATAAAACTA	Zea mays
Zm00001d014507	ARF16	Zm00001d013644	343	363	-	5.45e-06	TTTTTTGTTTTGGAAAAAAAA	Zea mays
Zm00001d014507	ARF16	Zm00001d013817	234	254	-	1.58e-07	TTTTCATTTTAGGGGAAAAAA	Zea mays
Zm00001d014507	ARF16	Zm00001d013955	32	52	+	8.83e-06	ATTACATTTGTGTCGAGACAA	Zea mays
Zm00001d014507	ARF16	Zm00001d014121	302	322	+	7.64e-06	ATTTTGATAGTGGCGGAAGAA	Zea mays
Zm00001d014507	ARF16	Zm00001d014785	15	35	+	2.19e-06	ATTATGATTGTTGCGGAACAT	Zea mays
Zm00001d014507	ARF16	Zm00001d015249	27	47	+	5.71e-06	CTTTGGATTTTGGCAAAAAAA	Zea mays
Zm00001d014507	ARF16	Zm00001d015401	244	264	-	4.8e-06	ATAACGTTTTTGAAAAAAAAA	Zea mays
Zm00001d014507	ARF16	Zm00001d016414	21	41	-	8.59e-06	TTTTCATGTATTGGGAGAAAT	Zea mays
Zm00001d014507	ARF16	Zm00001d016911	410	430	+	9.68e-06	TTCATATTTGTGACGCGACAT	Zea mays
Zm00001d014507	ARF16	Zm00001d016918	130	150	-	8.92e-06	TTTATGTTTTTAGTACAATAA	Zea mays
Zm00001d014507	ARF16	Zm00001d017147	53	73	-	7.4e-06	TTTTCCCTTTTAAGGAAAAAA	Zea mays
Zm00001d014507	ARF16	Zm00001d017380	161	181	-	1.98e-06	GTCACGTTTTCTGGAGGAAAA	Zea mays
Zm00001d014507	ARF16	Zm00001d017420	381	401	-	6.3e-06	TTTATGATCTTAGGAGAAAAA	Zea mays
Zm00001d014507	ARF16	Zm00001d018927	375	395	+	6.83e-07	TTTACACTTATGACGTAAAAT	Zea mays
Zm00001d014507	ARF16	Zm00001d019432	217	237	-	9.28e-06	AAGTCGCTTTTGGGAGGAAAA	Zea mays
Zm00001d014507	ARF16	Zm00001d019461	452	472	+	1.75e-06	TTTTTGGTTTTGGAGGGAAGT	Zea mays
Zm00001d014507	ARF16	Zm00001d019670	234	254	+	4.2e-06	ATTATTTTTTTTATAAAAAAA	Zea mays
Zm00001d014507	ARF16	Zm00001d020351	211	231	-	4.99e-06	TGTTCTTTTTTGGCAAGGAAA	Zea mays
Zm00001d014507	ARF16	Zm00001d021442	180	200	-	1.94e-06	TTTGCGTTTGCGGGGGAAGAT	Zea mays
Zm00001d014507	ARF16	Zm00001d022152	441	461	-	5.12e-06	TTTGCGTTCTCGGCAAGAAAG	Zea mays
Zm00001d014507	ARF16	Zm00001d022334	16	36	-	1.63e-06	TTTATTTTTTTTAGAAAAAAA	Zea mays
Zm00001d014507	ARF16	Zm00001d022380	167	187	+	8.65e-06	TTAATTTTTATGATGTGAAAT	Zea mays
Zm00001d014507	ARF16	Zm00001d022510	370	390	+	2.6e-06	TTGCCGTTTATGGCAAAAAAA	Zea mays
Zm00001d014507	ARF16	Zm00001d023228	117	137	-	8.65e-06	ATTACTTTTTTGACAGAGGGA	Zea mays
Zm00001d014507	ARF16	Zm00001d024009	392	412	+	1.94e-06	CTCATATTTTAGATGGGAAAA	Zea mays
Zm00001d014507	ARF16	Zm00001d024527	76	96	-	2.95e-06	GTATCGGTATTGGCTAGAAAA	Zea mays
Zm00001d014507	ARF16	Zm00001d024587	275	295	-	4.72e-06	ATTTTGTTTAAGGCAGGAAAG	Zea mays
Zm00001d014507	ARF16	Zm00001d024752	34	54	+	4e-06	TTTACTGTTTTCATGAAAAAT	Zea mays
Zm00001d014507	ARF16	Zm00001d025865	101	121	+	1.84e-07	TTCACGTGTTTAGCAAAAAAA	Zea mays
Zm00001d014507	ARF16	Zm00001d027572	2	22	-	8.59e-06	TTACCGGTTTTTGTCGGAAAT	Zea mays
Zm00001d014507	ARF16	Zm00001d027873	162	182	-	4.21e-08	TTTACATTTTTTGTAAAAAAA	Zea mays
Zm00001d014507	ARF16	Zm00001d028199	462	482	-	6.23e-06	ATTGTGGTATTTATAGAAAAA	Zea mays
Zm00001d014507	ARF16	Zm00001d028680	414	434	+	7.06e-06	TTCTTAATTTAGGCAGAAGAA	Zea mays
Zm00001d014507	ARF16	Zm00001d029028	287	307	-	6.71e-08	CTTGCCGTTTTGGTGGAAAAA	Zea mays
Zm00001d014507	ARF16	Zm00001d029251	224	244	-	1.06e-06	TTTAAGATTTTTGTTGGAAAA	Zea mays
Zm00001d014507	ARF16	Zm00001d029924	191	211	-	4.37e-06	GTTTCTGTATTTACGGAAAAA	Zea mays
Zm00001d014507	ARF16	Zm00001d030623	221	241	-	4.44e-06	TAGATTTTTTTGGCTAAAAAT	Zea mays
Zm00001d014507	ARF16	Zm00001d031351	10	30	+	2.96e-06	ATCACAGTTATAGTGAAAAAA	Zea mays
Zm00001d014507	ARF16	Zm00001d031937	333	353	+	2.09e-06	TTTCTGATTTCGGCAAAAAAA	Zea mays
Zm00001d014507	ARF16	Zm00001d032114	129	149	+	2.51e-06	TTTATGTGTTTTGAGGGAAAG	Zea mays
Zm00001d014507	ARF16	Zm00001d032409	69	89	+	9.75e-06	TTAATATTTTTTGTGAAATAA	Zea mays
Zm00001d014507	ARF16	Zm00001d032582	365	385	-	3.04e-06	TTTTCGGTTTAACCGAAAAAA	Zea mays
Zm00001d014507	ARF16	Zm00001d032703	247	267	+	9.48e-06	TTAACGGGTTTAGGGTAAATA	Zea mays
Zm00001d014507	ARF16	Zm00001d032923	190	210	-	1.38e-06	TTTTCTTTTTTGGCGCAAACA	Zea mays
Zm00001d014507	ARF16	Zm00001d033091	467	487	-	6.44e-06	TTTTTTTTTTTTGCGGATAAT	Zea mays
Zm00001d014507	ARF16	Zm00001d033455	345	365	-	8.56e-06	TCCACGAGTTTGGCAAGGAAA	Zea mays
Zm00001d014507	ARF16	Zm00001d033649	38	58	+	7.24e-06	TTTTCATTTTTTTCTAAAAAA	Zea mays
Zm00001d014507	ARF16	Zm00001d033906	447	467	-	6.83e-07	TACACGGGTTTGGCGAGGGAA	Zea mays
Zm00001d014507	ARF16	Zm00001d034073	237	257	-	2.3e-07	TTCACTTTTTTGGCAAGGAAT	Zea mays
Zm00001d014507	ARF16	Zm00001d034435	239	259	-	6.28e-06	TAATCGATTTTGACACGAAAT	Zea mays
Zm00001d014507	ARF16	Zm00001d034829	62	82	+	5.37e-06	AATACGTTTATTATGAAAAAT	Zea mays
Zm00001d014507	ARF16	Zm00001d035007	353	373	+	8.09e-06	ATTATTATTTTGATAGAAAAC	Zea mays
Zm00001d014507	ARF16	Zm00001d036230	398	418	+	5.78e-06	TTTGTGGGTTTGATGGTAAAT	Zea mays
Zm00001d014507	ARF16	Zm00001d036328	396	416	-	5.86e-06	TTATTTATTTTTATGGAAAAA	Zea mays
Zm00001d014507	ARF16	Zm00001d036903	213	233	+	7.95e-06	TTTACATTTTTCACTTGGAAA	Zea mays
Zm00001d014507	ARF16	Zm00001d037229	205	225	+	5.82e-06	TTTATGTTTTGGACGCAACAT	Zea mays
Zm00001d014507	ARF16	Zm00001d037926	249	269	-	7.26e-06	TCTGTATTTTTTACAGAAAAA	Zea mays
Zm00001d014507	ARF16	Zm00001d038020	115	135	-	9.82e-09	TTTTTGTTTTTGGCGCGAAAT	Zea mays
Zm00001d014507	ARF16	Zm00001d038023	45	65	+	1.77e-06	ATTATTATTATGAGGGGAAAA	Zea mays
Zm00001d014507	ARF16	Zm00001d038051	114	134	+	4.04e-06	TTTAGTATTTTTGGGAGAAAA	Zea mays
Zm00001d014507	ARF16	Zm00001d038783	214	234	+	1.33e-06	TTTTTTTTTTTTGTGGAAAAC	Zea mays
Zm00001d014507	ARF16	Zm00001d038791	132	152	-	2e-06	TTTACGTATTCGAGGAAAAAA	Zea mays
Zm00001d014507	ARF16	Zm00001d038857	211	231	-	5.63e-06	GTTTCCGTATTTACGGAAAAA	Zea mays
Zm00001d014507	ARF16	Zm00001d039624	224	244	+	7.42e-06	TTTATGGTTGTAGTGGGATAT	Zea mays
Zm00001d014507	ARF16	Zm00001d039824	357	377	+	5.31e-06	TATATTTTTTTGGCAAACAAA	Zea mays
Zm00001d014507	ARF16	Zm00001d039893	260	280	+	4.93e-06	TTTACAATTTTAGTGTAGAGA	Zea mays
Zm00001d014507	ARF16	Zm00001d040504	7	27	-	5.31e-06	TTAATTGTTTTTATGAGACAA	Zea mays
Zm00001d014507	ARF16	Zm00001d040656	308	328	+	1.8e-06	TATACGTTTTTTTCAGAAAAT	Zea mays
Zm00001d014507	ARF16	Zm00001d040702	295	315	-	3.47e-06	TTATCGTTTTTAGTTTAAAAA	Zea mays
Zm00001d014507	ARF16	Zm00001d042335	455	475	+	4.15e-06	TTTTCGGTTTATGGTAAAAAT	Zea mays
Zm00001d014507	ARF16	Zm00001d042437	454	474	-	7.67e-06	TTAATCCTTTTGTCGAAAAAA	Zea mays
Zm00001d014507	ARF16	Zm00001d042909	77	97	+	3.74e-06	TTTTTTATTTTTGCTGGAAAG	Zea mays
Zm00001d014507	ARF16	Zm00001d043547	320	340	-	9.38e-06	TTTGTAGTTTTGACAACGAAA	Zea mays
Zm00001d014507	ARF16	Zm00001d043837	159	179	+	2.59e-06	TATATTTTTTTTGCAAAACAA	Zea mays
Zm00001d014507	ARF16	Zm00001d043838	97	117	-	4e-06	TTTATTGTTTTGGGAAAGAGA	Zea mays
Zm00001d014507	ARF16	Zm00001d044540	103	123	+	8.41e-06	TTTGCATTTTTGCAAGGAAAA	Zea mays
Zm00001d014507	ARF16	Zm00001d044646	106	126	+	1.38e-06	AAAACGTTTTTTAGGGAAAAA	Zea mays
Zm00001d014507	ARF16	Zm00001d044849	222	242	-	3.38e-06	TATATGGTTTAGAGAGGACAA	Zea mays
Zm00001d014507	ARF16	Zm00001d044920	311	331	-	3.07e-06	AAAACATTTTTTACAGAAAAA	Zea mays
Zm00001d014507	ARF16	Zm00001d045505	478	498	-	7.88e-07	TTTACGGGTTCTACAGAAAAT	Zea mays
Zm00001d014507	ARF16	Zm00001d045800	204	224	-	4.36e-06	TTTGTGATTATAGTGGAAGAT	Zea mays
Zm00001d014507	ARF16	Zm00001d045948	215	235	+	8.4e-07	TTTTAGTGTTTGGCAGAAAAA	Zea mays
Zm00001d014507	ARF16	Zm00001d046442	55	75	+	6.88e-06	TTTTCGAGTTCTGTAAAAAAA	Zea mays
Zm00001d014507	ARF16	Zm00001d046595	64	84	+	8.83e-06	TTAGCACTTATGGCAAGGAAT	Zea mays
Zm00001d014507	ARF16	Zm00001d046993	40	60	+	8.99e-06	CGTGCGTTTGTGGCAGGAAAT	Zea mays
Zm00001d014507	ARF16	Zm00001d047209	312	332	-	5.59e-06	ATTTCGTGTTTGGTCAGAGAA	Zea mays
Zm00001d014507	ARF16	Zm00001d047638	6	26	-	7.75e-06	TTTACGTATTTGCGGGAGAAA	Zea mays
Zm00001d014507	ARF16	Zm00001d048544	80	100	+	9.68e-06	ATTATATTTTTTATTTAAAAA	Zea mays
Zm00001d014507	ARF16	Zm00001d049173	4	24	-	6.8e-06	TTAATTATTTTTGCACAAAAT	Zea mays
Zm00001d014507	ARF16	Zm00001d050130	473	493	-	8.74e-06	TTTATGTGTTATATGTAAAAT	Zea mays
Zm00001d014507	ARF16	Zm00001d051995	31	51	+	3.99e-07	TATTCGGTTTTTACCGAAAAA	Zea mays
Zm00001d014507	ARF16	Zm00001d052211	355	375	-	2.53e-06	TTTTTGTTTTTTGTTTGGAAA	Zea mays
Zm00001d014507	ARF16	Zm00001d052253	199	219	+	8.38e-06	TTTTTGCTTTTGGTTCAAAGA	Zea mays
Zm00001d014507	ARF16	Zm00001d052322	157	177	+	2.23e-06	TATGCATTTTTTGTATAAAAA	Zea mays
Zm00001d014507	ARF16	Zm00001d052357	293	313	-	4.26e-06	TATACATGTTCGACAGAGAAA	Zea mays
Zm00001d014507	ARF16	Zm00001d054043	154	174	-	4.2e-06	GTTTCTTTTTTGAGGAGGAAA	Zea mays
Zm00001d021424	NAC domain transcription factor family	Zm00001d000184	347	363	+	7.9e-06	GGCGTGCCCCACAAGCC	Zea mays
Zm00001d021424	NAC domain transcription factor family	Zm00001d002351	243	259	+	3.57e-06	AGCTTGTGTGAGAAGGA	Zea mays
Zm00001d021424	NAC domain transcription factor family	Zm00001d002707	335	351	-	6.25e-06	TGCGTGCGCAGCACGAA	Zea mays
Zm00001d021424	NAC domain transcription factor family	Zm00001d005114	205	221	+	6.61e-06	GACTTGAGGCCCACGCA	Zea mays
Zm00001d021424	NAC domain transcription factor family	Zm00001d005506	289	305	+	9.58e-06	AACTTGGCCAACAAGAA	Zea mays
Zm00001d021424	NAC domain transcription factor family	Zm00001d005654	52	68	+	2.53e-06	TACTTGTTTCGCACGTA	Zea mays
Zm00001d021424	NAC domain transcription factor family	Zm00001d007329	33	49	-	3.1e-06	GACTTGTTGGGCAAGGA	Zea mays
Zm00001d021424	NAC domain transcription factor family	Zm00001d009755	55	71	+	1.17e-06	TGCGTGCTCTTCAAGCA	Zea mays
Zm00001d021424	NAC domain transcription factor family	Zm00001d011330	192	208	-	5.96e-06	AACTTGTGTATGAAGAA	Zea mays
Zm00001d021424	NAC domain transcription factor family	Zm00001d011451	29	45	+	1.64e-06	TGCTTGCCTCTCAAGCA	Zea mays
Zm00001d021424	NAC domain transcription factor family	Zm00001d012173	199	215	+	7.48e-06	AGCTTATGAGACAAGGA	Zea mays
Zm00001d021424	NAC domain transcription factor family	Zm00001d012378	292	308	+	1.37e-06	AGCTTGTGCTCCAAGCA	Zea mays
Zm00001d021424	NAC domain transcription factor family	Zm00001d012477	216	232	-	9.48e-06	ATCTTGTGACCCAAGCA	Zea mays
Zm00001d021424	NAC domain transcription factor family	Zm00001d015091	174	190	+	3.06e-06	TGCTTGAAGAAGAAGAA	Zea mays
Zm00001d021424	NAC domain transcription factor family	Zm00001d018098	394	410	+	2.75e-06	GACTTGTGAAACAAGTC	Zea mays
Zm00001d021424	NAC domain transcription factor family	Zm00001d020100	244	260	+	9.28e-06	AACGTGTCGTGCAAGGT	Zea mays
Zm00001d021424	NAC domain transcription factor family	Zm00001d020887	356	372	+	5.43e-06	TGCGTGTGGCGCACGGC	Zea mays
Zm00001d021424	NAC domain transcription factor family	Zm00001d021804	404	420	-	4.88e-06	GACTTGCGTAGCAAGAA	Zea mays
Zm00001d021424	NAC domain transcription factor family	Zm00001d024763	205	221	+	7.99e-06	TGCGTGTGGGGCACGTC	Zea mays
Zm00001d021424	NAC domain transcription factor family	Zm00001d025533	149	165	+	2.67e-06	TACTTGAAGAAGAAGAA	Zea mays
Zm00001d021424	NAC domain transcription factor family	Zm00001d025690	438	454	-	7.15e-06	GGCTTGTTTCCCAAGAA	Zea mays
Zm00001d021424	NAC domain transcription factor family	Zm00001d026297	40	56	+	8.8e-06	AACGTCAGGCACAAGCA	Zea mays
Zm00001d021424	NAC domain transcription factor family	Zm00001d027415	251	267	+	3.39e-06	AACTTGTCCCACACGAA	Zea mays
Zm00001d021424	NAC domain transcription factor family	Zm00001d027694	12	28	-	3.21e-07	AACTTGTTAAACAAGGA	Zea mays
Zm00001d021424	NAC domain transcription factor family	Zm00001d029648	55	71	-	6.68e-06	TACGTGTAGAAGAAGAT	Zea mays
Zm00001d021424	NAC domain transcription factor family	Zm00001d030548	291	307	+	6.03e-06	TTCTTGTGGAACAAGTC	Zea mays
Zm00001d021424	NAC domain transcription factor family	Zm00001d030688	436	452	+	8.89e-06	GGCGTATCGATCAAGCA	Zea mays
Zm00001d021424	NAC domain transcription factor family	Zm00001d031189	129	145	+	6.99e-06	GACTTGAGAGAGAAGCA	Zea mays
Zm00001d021424	NAC domain transcription factor family	Zm00001d031527	1	17	+	1.28e-06	AGCGTGCTAAACACGCA	Zea mays
Zm00001d021424	NAC domain transcription factor family	Zm00001d031599	438	454	+	4.65e-06	TTCTTGCAGCACAAGAA	Zea mays
Zm00001d021424	NAC domain transcription factor family	Zm00001d033666	444	460	+	5.05e-06	AACTTGCAGAGCACGGA	Zea mays
Zm00001d021424	NAC domain transcription factor family	Zm00001d035183	201	217	-	4.88e-06	ACCGTGTTATTCAAGCA	Zea mays
Zm00001d021424	NAC domain transcription factor family	Zm00001d037291	190	206	-	5.56e-06	TACGTGTGGAAGAAGAT	Zea mays
Zm00001d021424	NAC domain transcription factor family	Zm00001d038820	343	359	-	5.36e-06	GACGTGCTCTTCAAGTA	Zea mays
Zm00001d021424	NAC domain transcription factor family	Zm00001d038878	288	304	-	4.48e-06	AGCGTGCGTACCAAGAA	Zea mays
Zm00001d021424	NAC domain transcription factor family	Zm00001d043614	279	295	+	2.2e-06	GGCTTGTAAAAGAAGCA	Zea mays
Zm00001d021424	NAC domain transcription factor family	Zm00001d048524	12	28	-	5.18e-06	CACGTGTGGCACAAGTA	Zea mays
Zm00001d020972	NAC domain transcription factor family	Zm00001d002129	24	42	+	6.75e-06	AGATTGCTTGCTAACCAAT	Zea mays
Zm00001d020972	NAC domain transcription factor family	Zm00001d002707	331	349	+	4.04e-07	AAGTTTCGTGCTGCGCACG	Zea mays
Zm00001d020972	NAC domain transcription factor family	Zm00001d002824	203	221	-	8.78e-06	CGATTCCTTGACGCATAAG	Zea mays
Zm00001d020972	NAC domain transcription factor family	Zm00001d002901	320	338	+	1.29e-06	GCCTTCCTTGGTGAGCAAG	Zea mays
Zm00001d020972	NAC domain transcription factor family	Zm00001d002992	214	232	-	6.35e-06	GTTTTTCTTGTAGCCTAAG	Zea mays
Zm00001d020972	NAC domain transcription factor family	Zm00001d002996	318	336	+	2.62e-06	TTCTTCCTTGATCTCCAAG	Zea mays
Zm00001d020972	NAC domain transcription factor family	Zm00001d003355	349	367	-	9.33e-06	CACTACCTTGGACATCACG	Zea mays
Zm00001d020972	NAC domain transcription factor family	Zm00001d003447	326	344	+	2.12e-06	ACCTTCCTTGCATGCCAAG	Zea mays
Zm00001d020972	NAC domain transcription factor family	Zm00001d003945	98	116	-	9.85e-06	GGGTTTCTTGGCATGTAAG	Zea mays
Zm00001d020972	NAC domain transcription factor family	Zm00001d005506	291	309	-	4.29e-06	TAGATTCTTGTTGGCCAAG	Zea mays
Zm00001d020972	NAC domain transcription factor family	Zm00001d005654	54	72	-	7.97e-06	TAGATACGTGCGAAACAAG	Zea mays
Zm00001d020972	NAC domain transcription factor family	Zm00001d006591	143	161	+	5.66e-07	GAGTTCCTTGCTGCGCACG	Zea mays
Zm00001d020972	NAC domain transcription factor family	Zm00001d007329	29	47	+	8.9e-06	TCTATCCTTGCCCAACAAG	Zea mays
Zm00001d020972	NAC domain transcription factor family	Zm00001d007708	466	484	-	7.23e-07	TGCTTGCTTGCAGTACAAG	Zea mays
Zm00001d020972	NAC domain transcription factor family	Zm00001d007954	200	218	+	3.44e-06	CCCTTTCGTGTGGTTCAAG	Zea mays
Zm00001d020972	NAC domain transcription factor family	Zm00001d008772	93	111	+	4.34e-06	TTTTTTCTTGGAAAATAAG	Zea mays
Zm00001d020972	NAC domain transcription factor family	Zm00001d011451	31	49	-	1.97e-06	CGGTTGCTTGAGAGGCAAG	Zea mays
Zm00001d020972	NAC domain transcription factor family	Zm00001d012173	201	219	-	6.18e-06	AACTTCCTTGTCTCATAAG	Zea mays
Zm00001d020972	NAC domain transcription factor family	Zm00001d012477	212	230	+	7.09e-06	TGAATGCTTGGGTCACAAG	Zea mays
Zm00001d020972	NAC domain transcription factor family	Zm00001d013099	317	335	-	5.08e-07	AGCTTGCTTGTTTCCCAAG	Zea mays
Zm00001d020972	NAC domain transcription factor family	Zm00001d013130	174	192	-	7.97e-06	CTGTAGCTTGCAGCCCACG	Zea mays
Zm00001d020972	NAC domain transcription factor family	Zm00001d014792	233	251	-	2e-06	GCCTTCCTTGGTGGACACG	Zea mays
Zm00001d020972	NAC domain transcription factor family	Zm00001d014867	441	459	-	6.57e-06	GAGTGGCTTGTGCAGCACG	Zea mays
Zm00001d020972	NAC domain transcription factor family	Zm00001d016948	469	487	-	2e-06	CGATTGCTTGCCGGCCACG	Zea mays
Zm00001d020972	NAC domain transcription factor family	Zm00001d017019	64	82	+	1.45e-06	CGCTTCCTTGGCCGCCAAG	Zea mays
Zm00001d020972	NAC domain transcription factor family	Zm00001d017199	264	282	+	3.8e-06	AGTTACCTTGGCGTACAAG	Zea mays
Zm00001d020972	NAC domain transcription factor family	Zm00001d018098	396	414	-	3.41e-06	TTTTGACTTGTTTCACAAG	Zea mays
Zm00001d020972	NAC domain transcription factor family	Zm00001d020405	188	206	+	4.44e-06	CATTTCCTTGTTCAACAAT	Zea mays
Zm00001d020972	NAC domain transcription factor family	Zm00001d021487	189	207	+	2.38e-06	GGCTTTCTTGGCTTCCAAG	Zea mays
Zm00001d020972	NAC domain transcription factor family	Zm00001d023299	333	351	-	2.42e-06	GCTTTCCTTGCGTACCAAG	Zea mays
Zm00001d020972	NAC domain transcription factor family	Zm00001d025451	457	475	+	3.26e-06	TTATTCCGTGGCACGCACG	Zea mays
Zm00001d020972	NAC domain transcription factor family	Zm00001d025690	434	452	+	3.34e-06	ATTATTCTTGGGAAACAAG	Zea mays
Zm00001d020972	NAC domain transcription factor family	Zm00001d025924	367	385	+	9.21e-06	AAGTTGCTTCTCCAACAAG	Zea mays
Zm00001d020972	NAC domain transcription factor family	Zm00001d026366	311	329	+	7.49e-06	CGATTCCTTGCATCGTAAG	Zea mays
Zm00001d020972	NAC domain transcription factor family	Zm00001d027415	253	271	-	6.01e-07	GGGTTTCGTGTGGGACAAG	Zea mays
Zm00001d020972	NAC domain transcription factor family	Zm00001d027624	419	437	-	3.34e-06	CTCTTCCGTGCCGTGCAAG	Zea mays
Zm00001d020972	NAC domain transcription factor family	Zm00001d027694	8	26	+	4.1e-06	ATCATCCTTGTTTAACAAG	Zea mays
Zm00001d020972	NAC domain transcription factor family	Zm00001d028371	24	42	-	5.17e-06	AAATTCCTTGCAGCTTAAG	Zea mays
Zm00001d020972	NAC domain transcription factor family	Zm00001d029628	430	448	-	1.01e-06	TGTTTCCTTGGCGTCCAAG	Zea mays
Zm00001d020972	NAC domain transcription factor family	Zm00001d031599	262	280	-	6.84e-06	ATCTTTCTTGTGCTGCAAT	Zea mays
Zm00001d020972	NAC domain transcription factor family	Zm00001d031922	328	346	-	9.27e-06	CATTTTCTTGGGCATCACT	Zea mays
Zm00001d020972	NAC domain transcription factor family	Zm00001d032591	147	165	+	4.98e-06	GGATTACTTGGACAACAAT	Zea mays
Zm00001d020972	NAC domain transcription factor family	Zm00001d034270	434	452	+	6.46e-07	CTCTTTCTTGCCGCGCAAG	Zea mays
Zm00001d020972	NAC domain transcription factor family	Zm00001d036950	207	225	-	6.89e-06	CGATTACGTGTGGAGTAAG	Zea mays
Zm00001d020972	NAC domain transcription factor family	Zm00001d038820	339	357	+	7.12e-07	TGATTACTTGAAGAGCACG	Zea mays
Zm00001d020972	NAC domain transcription factor family	Zm00001d039183	9	27	-	1.33e-06	TATTTCCTTGGCACCCAAG	Zea mays
Zm00001d020972	NAC domain transcription factor family	Zm00001d040318	241	259	-	3.1e-06	ACTTGTCTTGTGGAGCAAG	Zea mays
Zm00001d020972	NAC domain transcription factor family	Zm00001d042395	442	460	+	2.85e-06	GTCTTTCGTGGCGCCCAAG	Zea mays
Zm00001d020972	NAC domain transcription factor family	Zm00001d043610	387	405	-	1e-06	CGGTTCCTTGCCGGCCACG	Zea mays
Zm00001d020972	NAC domain transcription factor family	Zm00001d043623	320	338	+	5.97e-06	GAATTCCGTGTCATCCACG	Zea mays
Zm00001d020972	NAC domain transcription factor family	Zm00001d044100	31	49	-	1.46e-06	TGCTTGCTTGAGAAACAAG	Zea mays
Zm00001d020972	NAC domain transcription factor family	Zm00001d044156	241	259	-	8.67e-07	TGCTTTCTTGGCGGGCACG	Zea mays
Zm00001d020972	NAC domain transcription factor family	Zm00001d044409	245	263	-	5.81e-06	ATATTACTTGCTGCCCACT	Zea mays
Zm00001d020972	NAC domain transcription factor family	Zm00001d046454	64	82	-	2.82e-06	AAGTGTCTTGGCACACAAG	Zea mays
Zm00001d020972	NAC domain transcription factor family	Zm00001d048524	8	26	+	3.51e-06	AATATACTTGTGCCACACG	Zea mays
Zm00001d020972	NAC domain transcription factor family	Zm00001d049541	281	299	-	7.59e-06	GGTTTGCGTGAGTGTCAAG	Zea mays
Zm00001d020972	NAC domain transcription factor family	Zm00001d054043	441	459	-	9.91e-06	CGTTGGCTTGGACGTCACG	Zea mays
Zm00001d020938	bZIP transcription factor family	Zm00001d004072	129	143	-	7.92e-06	CATGGTTACGTCACT	Zea mays
Zm00001d020938	bZIP transcription factor family	Zm00001d005563	352	366	+	9.51e-06	AATGATGATGTCGCC	Zea mays
Zm00001d020938	bZIP transcription factor family	Zm00001d007379	406	420	-	9.21e-06	AGCGATGACGTCTTT	Zea mays
Zm00001d020938	bZIP transcription factor family	Zm00001d007477	62	76	-	8.77e-06	CGAGATGACGTCAAA	Zea mays
Zm00001d020938	bZIP transcription factor family	Zm00001d013817	455	469	+	3.82e-06	GCAAATGACGTCACT	Zea mays
Zm00001d020938	bZIP transcription factor family	Zm00001d014116	108	122	+	1.06e-06	TTAGATGACGTCACG	Zea mays
Zm00001d020938	bZIP transcription factor family	Zm00001d014726	453	467	+	2.65e-07	CACGATGACGTCACT	Zea mays
Zm00001d020938	bZIP transcription factor family	Zm00001d017969	190	204	+	9.69e-06	CGTACTGACGTCACG	Zea mays
Zm00001d020938	bZIP transcription factor family	Zm00001d022092	385	399	-	1.95e-06	AATGGTGACGTCAAT	Zea mays
Zm00001d020938	bZIP transcription factor family	Zm00001d022424	234	248	+	4.99e-06	GACGATGATGTCAGC	Zea mays
Zm00001d020938	bZIP transcription factor family	Zm00001d022590	340	354	+	1.71e-06	AAGGATGACGTCAGG	Zea mays
Zm00001d020938	bZIP transcription factor family	Zm00001d022593	466	480	-	5.4e-06	GCTGCTGACGTGATG	Zea mays
Zm00001d020938	bZIP transcription factor family	Zm00001d023299	211	225	+	7.87e-06	GATGATGACGTCGAG	Zea mays
Zm00001d020938	bZIP transcription factor family	Zm00001d023615	306	320	+	9.78e-06	CATGGTGACGTCGCG	Zea mays
Zm00001d020938	bZIP transcription factor family	Zm00001d025099	369	383	-	1.83e-06	GATGCTGACGTGAGC	Zea mays
Zm00001d020938	bZIP transcription factor family	Zm00001d025533	395	409	+	6.63e-06	ACTGGTGACGTCAAA	Zea mays
Zm00001d020938	bZIP transcription factor family	Zm00001d025920	361	375	+	9.51e-06	TCTGATGACGTGAGA	Zea mays
Zm00001d020938	bZIP transcription factor family	Zm00001d026670	413	427	-	6.17e-06	AATGATGACGTGGCT	Zea mays
Zm00001d020938	bZIP transcription factor family	Zm00001d027630	232	246	-	2.86e-06	ATAGATGACGTCGCT	Zea mays
Zm00001d020938	bZIP transcription factor family	Zm00001d028654	143	157	-	6.74e-06	AGAGCTGACGTGACA	Zea mays
Zm00001d020938	bZIP transcription factor family	Zm00001d029744	257	271	+	3.45e-07	GGTGGTGACGTCACT	Zea mays
Zm00001d020938	bZIP transcription factor family	Zm00001d032458	203	217	+	3.54e-06	ATTCCTGACGTCAGC	Zea mays
Zm00001d020938	bZIP transcription factor family	Zm00001d032552	214	228	+	7.35e-07	ACGGATGACGTCACC	Zea mays
Zm00001d020938	bZIP transcription factor family	Zm00001d033278	76	90	-	7.2e-06	GTAGATGACGTCTTC	Zea mays
Zm00001d020938	bZIP transcription factor family	Zm00001d034356	182	196	-	5.82e-06	ACGGGTGACGTCACG	Zea mays
Zm00001d020938	bZIP transcription factor family	Zm00001d036416	211	225	-	5.93e-06	GCGGGTGACGTCAGT	Zea mays
Zm00001d020938	bZIP transcription factor family	Zm00001d039222	319	333	+	2.9e-06	AACGCTGACGTGACA	Zea mays
Zm00001d020938	bZIP transcription factor family	Zm00001d039468	312	326	+	7.01e-06	GCGCCTGACGTCACC	Zea mays
Zm00001d020938	bZIP transcription factor family	Zm00001d039963	336	350	+	7.85e-08	GAAGATGACGTCATC	Zea mays
Zm00001d020938	bZIP transcription factor family	Zm00001d044666	435	449	+	6.29e-07	GATGCTGACGTCGCC	Zea mays
Zm00001d020938	bZIP transcription factor family	Zm00001d046945	455	469	+	7.47e-06	AGAACTGACGTCACA	Zea mays
Zm00001d020938	bZIP transcription factor family	Zm00001d046953	32	46	+	7.6e-06	AATGCTGACGTCTGA	Zea mays
Zm00001d020938	bZIP transcription factor family	Zm00001d047769	169	183	+	4.8e-06	CCTGCTGACGTCGCC	Zea mays
Zm00001d020938	bZIP transcription factor family	Zm00001d048908	157	171	+	3.18e-06	TGTGATGACGTGATC	Zea mays
Zm00001d020938	bZIP transcription factor family	Zm00001d049565	282	296	+	5.87e-06	GCCCATGACGTCAGC	Zea mays
Zm00001d015226	GARP, G2-like transcription factor family	Zm00001d000502	47	55	-	5e-06	AAGAAAACA	Zea mays
Zm00001d015226	GARP, G2-like transcription factor family	Zm00001d000829	268	276	-	9.99e-06	ATGAAAACA	Zea mays
Zm00001d015226	GARP, G2-like transcription factor family	Zm00001d001881	487	495	+	5e-06	AAGAAAACA	Zea mays
Zm00001d015226	GARP, G2-like transcription factor family	Zm00001d002178	159	167	+	9.99e-06	ATGAAAACA	Zea mays
Zm00001d015226	GARP, G2-like transcription factor family	Zm00001d003086	459	467	+	9.99e-06	ATGAAAACA	Zea mays
Zm00001d015226	GARP, G2-like transcription factor family	Zm00001d003091	187	195	+	5e-06	AAGAAAACA	Zea mays
Zm00001d015226	GARP, G2-like transcription factor family	Zm00001d004200	267	275	+	9.99e-06	ATGAAAACA	Zea mays
Zm00001d015226	GARP, G2-like transcription factor family	Zm00001d005010	169	177	+	5e-06	AAGAAAACA	Zea mays
Zm00001d015226	GARP, G2-like transcription factor family	Zm00001d005421	338	346	+	5e-06	AAGAAAACA	Zea mays
Zm00001d015226	GARP, G2-like transcription factor family	Zm00001d006531	10	18	+	5e-06	AAGAAAACA	Zea mays
Zm00001d015226	GARP, G2-like transcription factor family	Zm00001d006534	107	115	+	5e-06	AAGAAAACA	Zea mays
Zm00001d015226	GARP, G2-like transcription factor family	Zm00001d006639	330	338	-	9.99e-06	ATGAAAACA	Zea mays
Zm00001d015226	GARP, G2-like transcription factor family	Zm00001d006917	268	276	+	5e-06	AAGAAAACA	Zea mays
Zm00001d015226	GARP, G2-like transcription factor family	Zm00001d006951	154	162	+	5e-06	AAGAAAACA	Zea mays
Zm00001d015226	GARP, G2-like transcription factor family	Zm00001d007424	438	446	-	5e-06	AAGAAAACA	Zea mays
Zm00001d015226	GARP, G2-like transcription factor family	Zm00001d007954	305	313	+	5e-06	AAGAAAACA	Zea mays
Zm00001d015226	GARP, G2-like transcription factor family	Zm00001d008045	231	239	+	5e-06	AAGAAAACA	Zea mays
Zm00001d015226	GARP, G2-like transcription factor family	Zm00001d008173	202	210	+	9.99e-06	ATGAAAACA	Zea mays
Zm00001d015226	GARP, G2-like transcription factor family	Zm00001d009468	17	25	+	9.99e-06	ATGAAAACA	Zea mays
Zm00001d015226	GARP, G2-like transcription factor family	Zm00001d009613	52	60	+	9.99e-06	ATGAAAACA	Zea mays
Zm00001d015226	GARP, G2-like transcription factor family	Zm00001d009795	9	17	+	5e-06	AAGAAAACA	Zea mays
Zm00001d015226	GARP, G2-like transcription factor family	Zm00001d011315	418	426	+	5e-06	AAGAAAACA	Zea mays
Zm00001d015226	GARP, G2-like transcription factor family	Zm00001d011629	248	256	-	5e-06	AAGAAAACA	Zea mays
Zm00001d015226	GARP, G2-like transcription factor family	Zm00001d012146	416	424	+	5e-06	AAGAAAACA	Zea mays
Zm00001d015226	GARP, G2-like transcription factor family	Zm00001d012337	467	475	-	9.99e-06	ATGAAAACA	Zea mays
Zm00001d015226	GARP, G2-like transcription factor family	Zm00001d012437	66	74	-	9.99e-06	ATGAAAACA	Zea mays
Zm00001d015226	GARP, G2-like transcription factor family	Zm00001d013887	318	326	+	9.99e-06	ATGAAAACA	Zea mays
Zm00001d015226	GARP, G2-like transcription factor family	Zm00001d013937	211	219	+	5e-06	AAGAAAACA	Zea mays
Zm00001d015226	GARP, G2-like transcription factor family	Zm00001d013955	123	131	+	9.99e-06	ATGAAAACA	Zea mays
Zm00001d015226	GARP, G2-like transcription factor family	Zm00001d014013	76	84	+	5e-06	AAGAAAACA	Zea mays
Zm00001d015226	GARP, G2-like transcription factor family	Zm00001d014507	211	219	+	9.99e-06	ATGAAAACA	Zea mays
Zm00001d015226	GARP, G2-like transcription factor family	Zm00001d014804	491	499	+	9.99e-06	ATGAAAACA	Zea mays
Zm00001d015226	GARP, G2-like transcription factor family	Zm00001d014899	404	412	-	5e-06	AAGAAAACA	Zea mays
Zm00001d015226	GARP, G2-like transcription factor family	Zm00001d016017	251	259	-	5e-06	AAGAAAACA	Zea mays
Zm00001d015226	GARP, G2-like transcription factor family	Zm00001d017574	478	486	-	5e-06	AAGAAAACA	Zea mays
Zm00001d015226	GARP, G2-like transcription factor family	Zm00001d017659	303	311	+	5e-06	AAGAAAACA	Zea mays
Zm00001d015226	GARP, G2-like transcription factor family	Zm00001d017809	398	406	-	9.99e-06	ATGAAAACA	Zea mays
Zm00001d015226	GARP, G2-like transcription factor family	Zm00001d018130	63	71	+	5e-06	AAGAAAACA	Zea mays
Zm00001d015226	GARP, G2-like transcription factor family	Zm00001d018625	409	417	+	5e-06	AAGAAAACA	Zea mays
Zm00001d015226	GARP, G2-like transcription factor family	Zm00001d018686	353	361	-	5e-06	AAGAAAACA	Zea mays
Zm00001d015226	GARP, G2-like transcription factor family	Zm00001d019165	159	167	-	5e-06	AAGAAAACA	Zea mays
Zm00001d015226	GARP, G2-like transcription factor family	Zm00001d019361	445	453	-	5e-06	AAGAAAACA	Zea mays
Zm00001d015226	GARP, G2-like transcription factor family	Zm00001d020133	190	198	-	9.99e-06	ATGAAAACA	Zea mays
Zm00001d015226	GARP, G2-like transcription factor family	Zm00001d020957	223	231	+	5e-06	AAGAAAACA	Zea mays
Zm00001d015226	GARP, G2-like transcription factor family	Zm00001d021726	199	207	+	5e-06	AAGAAAACA	Zea mays
Zm00001d015226	GARP, G2-like transcription factor family	Zm00001d021959	275	283	+	9.99e-06	ATGAAAACA	Zea mays
Zm00001d015226	GARP, G2-like transcription factor family	Zm00001d022512	49	57	-	5e-06	AAGAAAACA	Zea mays
Zm00001d015226	GARP, G2-like transcription factor family	Zm00001d023228	180	188	+	5e-06	AAGAAAACA	Zea mays
Zm00001d015226	GARP, G2-like transcription factor family	Zm00001d024752	39	47	-	9.99e-06	ATGAAAACA	Zea mays
Zm00001d015226	GARP, G2-like transcription factor family	Zm00001d024768	40	48	+	5e-06	AAGAAAACA	Zea mays
Zm00001d015226	GARP, G2-like transcription factor family	Zm00001d024886	373	381	+	9.99e-06	ATGAAAACA	Zea mays
Zm00001d015226	GARP, G2-like transcription factor family	Zm00001d024960	359	367	+	5e-06	AAGAAAACA	Zea mays
Zm00001d015226	GARP, G2-like transcription factor family	Zm00001d024996	334	342	+	5e-06	AAGAAAACA	Zea mays
Zm00001d015226	GARP, G2-like transcription factor family	Zm00001d025200	35	43	-	9.99e-06	ATGAAAACA	Zea mays
Zm00001d015226	GARP, G2-like transcription factor family	Zm00001d025509	320	328	+	5e-06	AAGAAAACA	Zea mays
Zm00001d015226	GARP, G2-like transcription factor family	Zm00001d025566	141	149	+	9.99e-06	ATGAAAACA	Zea mays
Zm00001d015226	GARP, G2-like transcription factor family	Zm00001d025574	87	95	+	5e-06	AAGAAAACA	Zea mays
Zm00001d015226	GARP, G2-like transcription factor family	Zm00001d027893	38	46	-	9.99e-06	ATGAAAACA	Zea mays
Zm00001d015226	GARP, G2-like transcription factor family	Zm00001d028171	386	394	-	5e-06	AAGAAAACA	Zea mays
Zm00001d015226	GARP, G2-like transcription factor family	Zm00001d028214	346	354	-	5e-06	AAGAAAACA	Zea mays
Zm00001d015226	GARP, G2-like transcription factor family	Zm00001d028651	382	390	+	5e-06	AAGAAAACA	Zea mays
Zm00001d015226	GARP, G2-like transcription factor family	Zm00001d028912	111	119	-	5e-06	AAGAAAACA	Zea mays
Zm00001d015226	GARP, G2-like transcription factor family	Zm00001d028966	317	325	-	5e-06	AAGAAAACA	Zea mays
Zm00001d015226	GARP, G2-like transcription factor family	Zm00001d029713	404	412	+	5e-06	AAGAAAACA	Zea mays
Zm00001d015226	GARP, G2-like transcription factor family	Zm00001d030363	404	412	-	5e-06	AAGAAAACA	Zea mays
Zm00001d015226	GARP, G2-like transcription factor family	Zm00001d030981	433	441	-	9.99e-06	ATGAAAACA	Zea mays
Zm00001d015226	GARP, G2-like transcription factor family	Zm00001d031351	423	431	-	5e-06	AAGAAAACA	Zea mays
Zm00001d015226	GARP, G2-like transcription factor family	Zm00001d031372	369	377	-	5e-06	AAGAAAACA	Zea mays
Zm00001d015226	GARP, G2-like transcription factor family	Zm00001d031407	313	321	-	5e-06	AAGAAAACA	Zea mays
Zm00001d015226	GARP, G2-like transcription factor family	Zm00001d031751	283	291	-	5e-06	AAGAAAACA	Zea mays
Zm00001d015226	GARP, G2-like transcription factor family	Zm00001d032385	428	436	+	5e-06	AAGAAAACA	Zea mays
Zm00001d015226	GARP, G2-like transcription factor family	Zm00001d032517	451	459	+	5e-06	AAGAAAACA	Zea mays
Zm00001d015226	GARP, G2-like transcription factor family	Zm00001d032745	162	170	+	5e-06	AAGAAAACA	Zea mays
Zm00001d015226	GARP, G2-like transcription factor family	Zm00001d033451	63	71	+	5e-06	AAGAAAACA	Zea mays
Zm00001d015226	GARP, G2-like transcription factor family	Zm00001d033594	166	174	+	9.99e-06	ATGAAAACA	Zea mays
Zm00001d015226	GARP, G2-like transcription factor family	Zm00001d033666	224	232	-	9.99e-06	ATGAAAACA	Zea mays
Zm00001d015226	GARP, G2-like transcription factor family	Zm00001d033898	369	377	+	9.99e-06	ATGAAAACA	Zea mays
Zm00001d015226	GARP, G2-like transcription factor family	Zm00001d034417	484	492	+	5e-06	AAGAAAACA	Zea mays
Zm00001d015226	GARP, G2-like transcription factor family	Zm00001d034418	484	492	+	5e-06	AAGAAAACA	Zea mays
Zm00001d015226	GARP, G2-like transcription factor family	Zm00001d034420	315	323	+	5e-06	AAGAAAACA	Zea mays
Zm00001d015226	GARP, G2-like transcription factor family	Zm00001d034467	183	191	+	5e-06	AAGAAAACA	Zea mays
Zm00001d015226	GARP, G2-like transcription factor family	Zm00001d034518	477	485	-	5e-06	AAGAAAACA	Zea mays
Zm00001d015226	GARP, G2-like transcription factor family	Zm00001d034898	61	69	-	5e-06	AAGAAAACA	Zea mays
Zm00001d015226	GARP, G2-like transcription factor family	Zm00001d035034	13	21	+	5e-06	AAGAAAACA	Zea mays
Zm00001d015226	GARP, G2-like transcription factor family	Zm00001d035854	400	408	-	5e-06	AAGAAAACA	Zea mays
Zm00001d015226	GARP, G2-like transcription factor family	Zm00001d036016	140	148	+	5e-06	AAGAAAACA	Zea mays
Zm00001d015226	GARP, G2-like transcription factor family	Zm00001d036784	149	157	-	5e-06	AAGAAAACA	Zea mays
Zm00001d015226	GARP, G2-like transcription factor family	Zm00001d036831	238	246	-	9.99e-06	ATGAAAACA	Zea mays
Zm00001d015226	GARP, G2-like transcription factor family	Zm00001d037916	471	479	+	5e-06	AAGAAAACA	Zea mays
Zm00001d015226	GARP, G2-like transcription factor family	Zm00001d038327	318	326	+	5e-06	AAGAAAACA	Zea mays
Zm00001d015226	GARP, G2-like transcription factor family	Zm00001d038389	158	166	-	9.99e-06	ATGAAAACA	Zea mays
Zm00001d015226	GARP, G2-like transcription factor family	Zm00001d038450	83	91	+	5e-06	AAGAAAACA	Zea mays
Zm00001d015226	GARP, G2-like transcription factor family	Zm00001d038485	191	199	-	9.99e-06	ATGAAAACA	Zea mays
Zm00001d015226	GARP, G2-like transcription factor family	Zm00001d038555	267	275	+	9.99e-06	ATGAAAACA	Zea mays
Zm00001d015226	GARP, G2-like transcription factor family	Zm00001d038894	134	142	-	5e-06	AAGAAAACA	Zea mays
Zm00001d015226	GARP, G2-like transcription factor family	Zm00001d038930	98	106	-	5e-06	AAGAAAACA	Zea mays
Zm00001d015226	GARP, G2-like transcription factor family	Zm00001d038955	174	182	+	9.99e-06	ATGAAAACA	Zea mays
Zm00001d015226	GARP, G2-like transcription factor family	Zm00001d039567	256	264	-	5e-06	AAGAAAACA	Zea mays
Zm00001d015226	GARP, G2-like transcription factor family	Zm00001d039848	190	198	-	5e-06	AAGAAAACA	Zea mays
Zm00001d015226	GARP, G2-like transcription factor family	Zm00001d039893	181	189	+	5e-06	AAGAAAACA	Zea mays
Zm00001d015226	GARP, G2-like transcription factor family	Zm00001d040202	466	474	+	9.99e-06	ATGAAAACA	Zea mays
Zm00001d015226	GARP, G2-like transcription factor family	Zm00001d040667	230	238	+	9.99e-06	ATGAAAACA	Zea mays
Zm00001d015226	GARP, G2-like transcription factor family	Zm00001d042088	179	187	+	5e-06	AAGAAAACA	Zea mays
Zm00001d015226	GARP, G2-like transcription factor family	Zm00001d042216	89	97	+	5e-06	AAGAAAACA	Zea mays
Zm00001d015226	GARP, G2-like transcription factor family	Zm00001d042225	47	55	+	5e-06	AAGAAAACA	Zea mays
Zm00001d015226	GARP, G2-like transcription factor family	Zm00001d042869	101	109	-	9.99e-06	ATGAAAACA	Zea mays
Zm00001d015226	GARP, G2-like transcription factor family	Zm00001d043348	420	428	-	5e-06	AAGAAAACA	Zea mays
Zm00001d015226	GARP, G2-like transcription factor family	Zm00001d044138	114	122	-	9.99e-06	ATGAAAACA	Zea mays
Zm00001d015226	GARP, G2-like transcription factor family	Zm00001d044335	114	122	-	5e-06	AAGAAAACA	Zea mays
Zm00001d015226	GARP, G2-like transcription factor family	Zm00001d044695	116	124	+	5e-06	AAGAAAACA	Zea mays
Zm00001d015226	GARP, G2-like transcription factor family	Zm00001d045480	96	104	-	5e-06	AAGAAAACA	Zea mays
Zm00001d015226	GARP, G2-like transcription factor family	Zm00001d045557	116	124	+	9.99e-06	ATGAAAACA	Zea mays
Zm00001d015226	GARP, G2-like transcription factor family	Zm00001d046554	334	342	+	9.99e-06	ATGAAAACA	Zea mays
Zm00001d015226	GARP, G2-like transcription factor family	Zm00001d047591	271	279	+	5e-06	AAGAAAACA	Zea mays
Zm00001d015226	GARP, G2-like transcription factor family	Zm00001d048358	468	476	+	5e-06	AAGAAAACA	Zea mays
Zm00001d015226	GARP, G2-like transcription factor family	Zm00001d048602	310	318	-	5e-06	AAGAAAACA	Zea mays
Zm00001d015226	GARP, G2-like transcription factor family	Zm00001d049233	147	155	+	5e-06	AAGAAAACA	Zea mays
Zm00001d015226	GARP, G2-like transcription factor family	Zm00001d049565	122	130	+	9.99e-06	ATGAAAACA	Zea mays
Zm00001d015226	GARP, G2-like transcription factor family	Zm00001d050164	306	314	+	9.99e-06	ATGAAAACA	Zea mays
Zm00001d015226	GARP, G2-like transcription factor family	Zm00001d051438	478	486	-	5e-06	AAGAAAACA	Zea mays
Zm00001d015226	GARP, G2-like transcription factor family	Zm00001d051453	435	443	+	5e-06	AAGAAAACA	Zea mays
Zm00001d015226	GARP, G2-like transcription factor family	Zm00001d051504	57	65	-	9.99e-06	ATGAAAACA	Zea mays
Zm00001d015226	GARP, G2-like transcription factor family	Zm00001d051513	103	111	+	9.99e-06	ATGAAAACA	Zea mays
Zm00001d015226	GARP, G2-like transcription factor family	Zm00001d052268	210	218	-	5e-06	AAGAAAACA	Zea mays
Zm00001d015226	GARP, G2-like transcription factor family	Zm00001d052357	376	384	+	5e-06	AAGAAAACA	Zea mays
Zm00001d015226	GARP, G2-like transcription factor family	Zm00001d053358	278	286	-	9.99e-06	ATGAAAACA	Zea mays
Zm00001d015226	GARP, G2-like transcription factor family	Zm00001d053726	242	250	-	9.99e-06	ATGAAAACA	Zea mays
Zm00001d015226	GARP, G2-like transcription factor family	Zm00001d054087	348	356	+	5e-06	AAGAAAACA	Zea mays
Zm00001d039065	bZIP transcription factor family	Zm00001d000230	482	496	+	3.8e-06	CGCCACGTCATCGCC	Zea mays
Zm00001d039065	bZIP transcription factor family	Zm00001d001860	73	87	-	9.25e-06	GGCCACGTGGGCACG	Zea mays
Zm00001d039065	bZIP transcription factor family	Zm00001d001881	35	49	+	5.15e-06	CGACACGTCAGCTGC	Zea mays
Zm00001d039065	bZIP transcription factor family	Zm00001d002020	252	266	-	1.24e-06	TGCCACGTCTCAAAA	Zea mays
Zm00001d039065	bZIP transcription factor family	Zm00001d002178	297	311	-	1.79e-06	AGCCACGTCAGCAAG	Zea mays
Zm00001d039065	bZIP transcription factor family	Zm00001d002246	330	344	-	3.39e-08	TGCCACGTCAGCTCT	Zea mays
Zm00001d039065	bZIP transcription factor family	Zm00001d002312	23	37	+	3.52e-06	AGCCACGTCACCCAA	Zea mays
Zm00001d039065	bZIP transcription factor family	Zm00001d002535	88	102	+	6.76e-06	CTCCACGTCACCTCA	Zea mays
Zm00001d039065	bZIP transcription factor family	Zm00001d002715	10	24	+	1.48e-06	TGCCACGTGGGCTAG	Zea mays
Zm00001d039065	bZIP transcription factor family	Zm00001d002725	443	457	-	1.81e-06	TGACACGTGAGCAGC	Zea mays
Zm00001d039065	bZIP transcription factor family	Zm00001d003091	148	162	+	1.73e-07	TGCCACGTCATCCTT	Zea mays
Zm00001d039065	bZIP transcription factor family	Zm00001d003530	336	350	+	2.23e-06	TTCCACGTCACCAAG	Zea mays
Zm00001d039065	bZIP transcription factor family	Zm00001d003857	393	407	-	2.3e-06	TGCCACGTCTGACTC	Zea mays
Zm00001d039065	bZIP transcription factor family	Zm00001d003966	296	310	-	2.35e-06	TGCCACGTCTACAAA	Zea mays
Zm00001d039065	bZIP transcription factor family	Zm00001d005164	368	382	+	4.77e-06	CGCCACGTCACCCCG	Zea mays
Zm00001d039065	bZIP transcription factor family	Zm00001d005563	155	169	-	4.06e-07	TGCCACGTCGGCTGT	Zea mays
Zm00001d039065	bZIP transcription factor family	Zm00001d005798	307	321	-	3.39e-08	TGCCACGTCAGCTCT	Zea mays
Zm00001d039065	bZIP transcription factor family	Zm00001d006630	80	94	+	6.33e-06	TGCCACGTCACGAAG	Zea mays
Zm00001d039065	bZIP transcription factor family	Zm00001d006753	275	289	-	8.53e-06	TGCCACGTCGGAGCG	Zea mays
Zm00001d039065	bZIP transcription factor family	Zm00001d007803	76	90	+	2.44e-06	TGCCACGTCATAGCT	Zea mays
Zm00001d039065	bZIP transcription factor family	Zm00001d009404	338	352	+	4.29e-06	TTCCACGTCGCCTCC	Zea mays
Zm00001d039065	bZIP transcription factor family	Zm00001d009473	358	372	+	9.96e-06	CGCCACGTGTTCCTT	Zea mays
Zm00001d039065	bZIP transcription factor family	Zm00001d009929	352	366	+	9.82e-06	TGACACGTGGACATA	Zea mays
Zm00001d039065	bZIP transcription factor family	Zm00001d010821	457	471	+	4.33e-06	TGACACGTCTTCTTT	Zea mays
Zm00001d039065	bZIP transcription factor family	Zm00001d010855	372	386	+	1.36e-06	CGCCACGTCACCACG	Zea mays
Zm00001d039065	bZIP transcription factor family	Zm00001d011751	173	187	-	3.34e-09	TGCCACGTCAGCAAT	Zea mays
Zm00001d039065	bZIP transcription factor family	Zm00001d011833	311	325	-	2.12e-06	TGCCACGTAACCCTA	Zea mays
Zm00001d039065	bZIP transcription factor family	Zm00001d012482	277	291	+	3.21e-06	AGCCACGTCGCCACC	Zea mays
Zm00001d039065	bZIP transcription factor family	Zm00001d013097	345	359	+	4.86e-07	TGCCACGTCACCGAA	Zea mays
Zm00001d039065	bZIP transcription factor family	Zm00001d013736	126	140	+	2.37e-06	TGCCACGTCACACAG	Zea mays
Zm00001d039065	bZIP transcription factor family	Zm00001d013927	135	149	-	4.71e-07	TGCCACGTCACAAGA	Zea mays
Zm00001d039065	bZIP transcription factor family	Zm00001d014060	189	203	+	9.06e-06	TTCCACGTAAGAAAA	Zea mays
Zm00001d039065	bZIP transcription factor family	Zm00001d014953	178	192	-	5.93e-06	AGCCACGTCGGCACG	Zea mays
Zm00001d039065	bZIP transcription factor family	Zm00001d015459	267	281	-	7.21e-06	CGCCACGTCAACGTC	Zea mays
Zm00001d039065	bZIP transcription factor family	Zm00001d016942	159	173	-	7.78e-06	CGCCACGTAAACATT	Zea mays
Zm00001d039065	bZIP transcription factor family	Zm00001d017287	450	464	-	7.91e-06	CGCCACGTCGGAGAC	Zea mays
Zm00001d039065	bZIP transcription factor family	Zm00001d017364	84	98	-	5.64e-06	CGCCACGTGGCAACT	Zea mays
Zm00001d039065	bZIP transcription factor family	Zm00001d017525	80	94	+	7.71e-06	TGCCACGTCAAAGCT	Zea mays
Zm00001d039065	bZIP transcription factor family	Zm00001d017809	386	400	+	1.64e-06	TGCCACGTGGCCTGT	Zea mays
Zm00001d039065	bZIP transcription factor family	Zm00001d018421	257	271	-	8.29e-06	CGCCACGTCGTACAC	Zea mays
Zm00001d039065	bZIP transcription factor family	Zm00001d019734	313	327	+	4.29e-06	GGCCACGTCAGCCTG	Zea mays
Zm00001d039065	bZIP transcription factor family	Zm00001d020280	400	414	-	5.84e-06	TGACACGTGGGCCAT	Zea mays
Zm00001d039065	bZIP transcription factor family	Zm00001d021291	319	333	+	6.03e-06	CGCCACGTCATCGTG	Zea mays
Zm00001d039065	bZIP transcription factor family	Zm00001d022437	67	81	+	2.3e-06	TGCCACGTAACCCAC	Zea mays
Zm00001d039065	bZIP transcription factor family	Zm00001d023278	122	136	+	6.92e-06	CGCCACGTCACAGCC	Zea mays
Zm00001d039065	bZIP transcription factor family	Zm00001d023811	427	441	+	2.23e-06	TTCCACGTCACCAAG	Zea mays
Zm00001d039065	bZIP transcription factor family	Zm00001d024574	462	476	+	2.91e-06	TGCCACGTCGTCCAG	Zea mays
Zm00001d039065	bZIP transcription factor family	Zm00001d024734	186	200	+	7.32e-06	CGCCACGTCGTCCGT	Zea mays
Zm00001d039065	bZIP transcription factor family	Zm00001d025129	444	458	+	1.85e-06	TGCCACGTCATTTTT	Zea mays
Zm00001d039065	bZIP transcription factor family	Zm00001d025305	334	348	-	4e-06	TGCCACGTCTGAGTC	Zea mays
Zm00001d039065	bZIP transcription factor family	Zm00001d025973	405	419	+	8.41e-06	ATCCACGTCATCAAC	Zea mays
Zm00001d039065	bZIP transcription factor family	Zm00001d026056	158	172	-	1.61e-06	TGCCACGTCAAATAT	Zea mays
Zm00001d039065	bZIP transcription factor family	Zm00001d026586	378	392	-	7.65e-06	GTCCACGTCACCTTC	Zea mays
Zm00001d039065	bZIP transcription factor family	Zm00001d026670	413	427	+	7.99e-07	AGCCACGTCATCATT	Zea mays
Zm00001d039065	bZIP transcription factor family	Zm00001d027760	120	134	-	2.87e-06	CGCCACGTGGGAATA	Zea mays
Zm00001d039065	bZIP transcription factor family	Zm00001d028230	397	411	-	4.57e-06	CGCCACGTCGGCGCT	Zea mays
Zm00001d039065	bZIP transcription factor family	Zm00001d028662	77	91	+	6.39e-06	TTCCACGTCGTCCTC	Zea mays
Zm00001d039065	bZIP transcription factor family	Zm00001d028867	274	288	+	9.61e-06	TGACACGTCGTCTCG	Zea mays
Zm00001d039065	bZIP transcription factor family	Zm00001d030091	434	448	-	3.34e-09	TGCCACGTCAGCAAT	Zea mays
Zm00001d039065	bZIP transcription factor family	Zm00001d030172	78	92	-	7.03e-06	TGCCACGTAAAAAAC	Zea mays
Zm00001d039065	bZIP transcription factor family	Zm00001d030614	174	188	+	2.25e-07	TGCCACGTCAGATCC	Zea mays
Zm00001d039065	bZIP transcription factor family	Zm00001d030942	113	127	+	4.89e-06	TGCCACGTCTACATG	Zea mays
Zm00001d039065	bZIP transcription factor family	Zm00001d031850	340	354	-	2.23e-06	TGACACGTCAGATCC	Zea mays
Zm00001d039065	bZIP transcription factor family	Zm00001d032197	247	261	-	3.93e-06	TGCCACGTCGGACAG	Zea mays
Zm00001d039065	bZIP transcription factor family	Zm00001d032855	274	288	-	9.19e-06	TTCCACGTGAGCCAG	Zea mays
Zm00001d039065	bZIP transcription factor family	Zm00001d033594	431	445	+	6.39e-06	GGCCACGTCACCCGA	Zea mays
Zm00001d039065	bZIP transcription factor family	Zm00001d033714	333	347	-	8.72e-06	CGCCACGTCGGCGAG	Zea mays
Zm00001d039065	bZIP transcription factor family	Zm00001d033719	169	183	+	6.28e-06	GTCCACGTCATCATC	Zea mays
Zm00001d039065	bZIP transcription factor family	Zm00001d034197	218	232	+	1.28e-07	TGCCACGTCACCCTC	Zea mays
Zm00001d039065	bZIP transcription factor family	Zm00001d036533	197	211	+	3.39e-08	TGCCACGTCAGCTCT	Zea mays
Zm00001d039065	bZIP transcription factor family	Zm00001d036539	29	43	+	9.33e-06	GGCCACGTCGGCGCC	Zea mays
Zm00001d039065	bZIP transcription factor family	Zm00001d036650	145	159	-	5.24e-06	CGCCACGTCGTCGTC	Zea mays
Zm00001d039065	bZIP transcription factor family	Zm00001d037079	343	357	+	6.64e-06	AGCCACGTCGGCGTT	Zea mays
Zm00001d039065	bZIP transcription factor family	Zm00001d037747	382	396	+	4.46e-06	CGCCACGTCAACCTC	Zea mays
Zm00001d039065	bZIP transcription factor family	Zm00001d037926	450	464	-	1.11e-06	CGCCACGTCAGCGTC	Zea mays
Zm00001d039065	bZIP transcription factor family	Zm00001d038387	422	436	-	2.81e-06	TGCCACGTGGGCGCC	Zea mays
Zm00001d039065	bZIP transcription factor family	Zm00001d038522	260	274	-	9.25e-06	AGCCACGTCGTCCAA	Zea mays
Zm00001d039065	bZIP transcription factor family	Zm00001d039029	472	486	-	5.68e-06	TGACACGTCAAAAAT	Zea mays
Zm00001d039065	bZIP transcription factor family	Zm00001d039312	359	373	-	7.44e-06	CGCCACGTGGCCGTT	Zea mays
Zm00001d039065	bZIP transcription factor family	Zm00001d039468	226	240	-	3.05e-07	TGCCACGTCACCCCC	Zea mays
Zm00001d039065	bZIP transcription factor family	Zm00001d040755	75	89	+	1.61e-06	TGCCACGTCAAATAT	Zea mays
Zm00001d039065	bZIP transcription factor family	Zm00001d042842	1	15	+	2.49e-06	TGCCACGTGTGCTGC	Zea mays
Zm00001d039065	bZIP transcription factor family	Zm00001d042848	291	305	+	7.32e-06	GTCCACGTCATCAAC	Zea mays
Zm00001d039065	bZIP transcription factor family	Zm00001d043025	311	325	+	3.21e-06	AGCCACGTCGCCACC	Zea mays
Zm00001d039065	bZIP transcription factor family	Zm00001d043175	168	182	-	3.18e-06	TGCCACGTAGGAAAA	Zea mays
Zm00001d039065	bZIP transcription factor family	Zm00001d043491	227	241	-	7.37e-06	GGCCACGTCTCCTCT	Zea mays
Zm00001d039065	bZIP transcription factor family	Zm00001d045145	3	17	+	6.14e-06	AGCCACGTGACATTC	Zea mays
Zm00001d039065	bZIP transcription factor family	Zm00001d045366	130	144	-	3.16e-06	AGCCACGTCATCCTT	Zea mays
Zm00001d039065	bZIP transcription factor family	Zm00001d046467	196	210	+	4.33e-06	TGCCACGTCAATATC	Zea mays
Zm00001d039065	bZIP transcription factor family	Zm00001d046540	114	128	+	5.46e-06	TGCCACGTGGGTACC	Zea mays
Zm00001d039065	bZIP transcription factor family	Zm00001d048693	432	446	-	8.34e-07	CGCCACGTCGCCAAA	Zea mays
Zm00001d039065	bZIP transcription factor family	Zm00001d049610	120	134	+	6.44e-06	CGCCACGTCGGAGTT	Zea mays
Zm00001d039065	bZIP transcription factor family	Zm00001d050716	436	450	+	1.28e-06	TGCCACGTCGGCGCC	Zea mays
Zm00001d039065	bZIP transcription factor family	Zm00001d051761	222	236	-	5.98e-06	AGCCACGTCGCAAAA	Zea mays
Zm00001d039065	bZIP transcription factor family	Zm00001d052247	192	206	-	1.57e-06	TGCCACGTCAGACAG	Zea mays
Zm00001d039065	bZIP transcription factor family	Zm00001d052927	466	480	+	6.65e-07	TGCCACGTGACCACG	Zea mays
Zm00001d039065	bZIP transcription factor family	Zm00001d053781	263	277	-	1.06e-06	CGCCACGTCGCCTTC	Zea mays
Zm00001d012746	WRKY65	Zm00001d002993	79	89	+	8.03e-07	TAAAGTCAACG	Zea mays
Zm00001d012746	WRKY65	Zm00001d003197	274	284	+	2.41e-06	AAAAGTCAACT	Zea mays
Zm00001d012746	WRKY65	Zm00001d004908	209	219	+	9.84e-06	AAAAGTCAAAG	Zea mays
Zm00001d012746	WRKY65	Zm00001d005375	246	256	+	5.65e-06	AAAAGTCAACA	Zea mays
Zm00001d012746	WRKY65	Zm00001d006069	222	232	+	7.26e-06	AAGAGTCAACG	Zea mays
Zm00001d012746	WRKY65	Zm00001d006293	315	325	-	6.49e-06	TAAAGTCAACT	Zea mays
Zm00001d012746	WRKY65	Zm00001d006825	271	281	+	1.83e-06	AGAAGTCAACG	Zea mays
Zm00001d012746	WRKY65	Zm00001d010448	201	211	+	9.28e-06	AAAGGTCAACT	Zea mays
Zm00001d012746	WRKY65	Zm00001d010945	303	313	+	4.1e-06	CTAAGTCAACG	Zea mays
Zm00001d012746	WRKY65	Zm00001d011157	442	452	+	9.84e-06	AAAAGTCAAAG	Zea mays
Zm00001d012746	WRKY65	Zm00001d012170	165	175	-	8.76e-06	CCAAGTCAACG	Zea mays
Zm00001d012746	WRKY65	Zm00001d012561	76	86	+	5.26e-07	CAAAGTCAACG	Zea mays
Zm00001d012746	WRKY65	Zm00001d012782	347	357	+	2.88e-06	CATAGTCAACG	Zea mays
Zm00001d012746	WRKY65	Zm00001d012962	423	433	+	7.26e-06	AAGAGTCAACG	Zea mays
Zm00001d012746	WRKY65	Zm00001d013781	112	122	+	6.74e-06	AATGGTCAACG	Zea mays
Zm00001d012746	WRKY65	Zm00001d014181	383	393	+	8.26e-06	AGTAGTCAACG	Zea mays
Zm00001d012746	WRKY65	Zm00001d014360	330	340	+	2.41e-06	AAAAGTCAACT	Zea mays
Zm00001d012746	WRKY65	Zm00001d015627	318	328	-	9.28e-06	AAAGGTCAACT	Zea mays
Zm00001d012746	WRKY65	Zm00001d017166	58	68	-	2.41e-06	AAAAGTCAACT	Zea mays
Zm00001d012746	WRKY65	Zm00001d017616	251	261	-	8.26e-06	AGTAGTCAACG	Zea mays
Zm00001d012746	WRKY65	Zm00001d018500	60	70	+	7.26e-06	AAAAGTCAACC	Zea mays
Zm00001d012746	WRKY65	Zm00001d019422	117	127	-	2.41e-06	AAAAGTCAACT	Zea mays
Zm00001d012746	WRKY65	Zm00001d020703	18	28	-	5.65e-06	GGAAGTCAACG	Zea mays
Zm00001d012746	WRKY65	Zm00001d021442	329	339	-	6.49e-06	TAAAGTCAACT	Zea mays
Zm00001d012746	WRKY65	Zm00001d023570	21	31	+	9.84e-06	AAAAGTCAAAG	Zea mays
Zm00001d012746	WRKY65	Zm00001d023625	364	374	+	8.03e-07	TAAAGTCAACG	Zea mays
Zm00001d012746	WRKY65	Zm00001d024148	139	149	+	6.18e-06	CAAAGTCAACT	Zea mays
Zm00001d012746	WRKY65	Zm00001d030555	417	427	+	9.53e-06	TCAAGTCAACG	Zea mays
Zm00001d012746	WRKY65	Zm00001d030581	371	381	-	9.84e-06	AAAAGTCAAAG	Zea mays
Zm00001d012746	WRKY65	Zm00001d032947	248	258	+	9.28e-06	AAAGGTCAACT	Zea mays
Zm00001d012746	WRKY65	Zm00001d038648	232	242	+	5.26e-07	CAAAGTCAACG	Zea mays
Zm00001d012746	WRKY65	Zm00001d040777	413	423	-	4.84e-06	TGAAGTCAACG	Zea mays
Zm00001d012746	WRKY65	Zm00001d041025	305	315	+	4.1e-06	CTAAGTCAACG	Zea mays
Zm00001d012746	WRKY65	Zm00001d042943	396	406	+	9.84e-06	AAAAGTCAAAG	Zea mays
Zm00001d012746	WRKY65	Zm00001d045007	388	398	-	9.84e-06	AAAAGTCAAAG	Zea mays
Zm00001d012746	WRKY65	Zm00001d045210	161	171	+	8.76e-06	CCAAGTCAACG	Zea mays
Zm00001d012746	WRKY65	Zm00001d045211	314	324	-	4.84e-06	TGAAGTCAACG	Zea mays
Zm00001d012746	WRKY65	Zm00001d046277	55	65	+	9.01e-06	AACAGTCAACG	Zea mays
Zm00001d012746	WRKY65	Zm00001d048440	362	372	-	9.84e-06	AAAAGTCAAAG	Zea mays
Zm00001d012746	WRKY65	Zm00001d049303	10	20	+	2.41e-06	AAAAGTCAACT	Zea mays
Zm00001d012746	WRKY65	Zm00001d051761	424	434	+	5.26e-07	CAAAGTCAACG	Zea mays
Zm00001d012746	WRKY65	Zm00001d052927	414	424	-	8.54e-06	ATTAGTCAACG	Zea mays
Zm00001d012746	WRKY65	Zm00001d053522	393	403	+	8.76e-06	CCAAGTCAACG	Zea mays
Zm00001d042609	NAC domain transcription factor family	Zm00001d000247	369	390	+	3.35e-06	GACGTGCATGACTTTTTTTTTT	Zea mays
Zm00001d042609	NAC domain transcription factor family	Zm00001d002316	194	215	-	2.82e-07	TACGTAATCGATATGGAAACTA	Zea mays
Zm00001d042609	NAC domain transcription factor family	Zm00001d002984	166	187	-	9.19e-06	TACGTGTGGAATATTAACTTCT	Zea mays
Zm00001d042609	NAC domain transcription factor family	Zm00001d003091	290	311	-	6.15e-06	TGCGTAAACTAATCGTCTTTCT	Zea mays
Zm00001d042609	NAC domain transcription factor family	Zm00001d004203	391	412	+	2.82e-06	TACGTAAGCATTTAGCCCTCTT	Zea mays
Zm00001d042609	NAC domain transcription factor family	Zm00001d005359	153	174	+	9.47e-06	TACGTAAACTATTTGCATTGTC	Zea mays
Zm00001d042609	NAC domain transcription factor family	Zm00001d006755	320	341	+	1.04e-06	AGCGTGTAGAATTTGTCATCCG	Zea mays
Zm00001d042609	NAC domain transcription factor family	Zm00001d008559	442	463	+	3.9e-06	TGCGTAAGCGATTCTACTTCTT	Zea mays
Zm00001d042609	NAC domain transcription factor family	Zm00001d008625	225	246	+	8.14e-06	GACGTGTACTACTCTTTTTGTA	Zea mays
Zm00001d042609	NAC domain transcription factor family	Zm00001d010945	400	421	-	4.39e-07	GACGTGGAAGAATTGACATCTT	Zea mays
Zm00001d042609	NAC domain transcription factor family	Zm00001d011056	378	399	+	1.47e-06	GACGTGACGTGCATGCATACTT	Zea mays
Zm00001d042609	NAC domain transcription factor family	Zm00001d012173	220	241	+	9.47e-06	TACGTGAGAAGCTTGTTCTTTA	Zea mays
Zm00001d042609	NAC domain transcription factor family	Zm00001d012600	43	64	-	6.06e-06	TTCGTGAACCAAACGACATCTT	Zea mays
Zm00001d042609	NAC domain transcription factor family	Zm00001d013229	402	423	+	5.59e-06	TACGTGTCGTAGTCTCCCTCCT	Zea mays
Zm00001d042609	NAC domain transcription factor family	Zm00001d015627	19	40	-	3.07e-06	TACGTGTTGGTCACTTATTTTT	Zea mays
Zm00001d042609	NAC domain transcription factor family	Zm00001d017429	292	313	+	1.74e-06	TACGTGAACCAAACGGCACCTA	Zea mays
Zm00001d042609	NAC domain transcription factor family	Zm00001d018090	323	344	+	2.54e-06	TACGTGTTCTAGTAGTATTCCA	Zea mays
Zm00001d042609	NAC domain transcription factor family	Zm00001d018685	155	176	-	7.43e-06	TACGTATAGCACTTGACTGTTG	Zea mays
Zm00001d042609	NAC domain transcription factor family	Zm00001d018801	294	315	+	3.18e-06	GACGTATACGTCTTGGATTTGT	Zea mays
Zm00001d042609	NAC domain transcription factor family	Zm00001d020495	117	138	+	4.68e-06	TACGTGCTTAATTCATCATCGT	Zea mays
Zm00001d042609	NAC domain transcription factor family	Zm00001d021695	250	271	-	1.77e-06	GACGTGATCAAAATGCATATTA	Zea mays
Zm00001d042609	NAC domain transcription factor family	Zm00001d024210	364	385	+	2.87e-06	GACGTACACAAGACGGCATCTA	Zea mays
Zm00001d042609	NAC domain transcription factor family	Zm00001d025814	46	67	-	1.26e-06	TGCGTAAACTAATCGTCTTCCT	Zea mays
Zm00001d042609	NAC domain transcription factor family	Zm00001d026306	102	123	+	9.62e-07	TCCGTGTAGATTTTTTTTTCTT	Zea mays
Zm00001d042609	NAC domain transcription factor family	Zm00001d027630	180	201	-	1.36e-06	AACGTGTAAAATTCGACCACGT	Zea mays
Zm00001d042609	NAC domain transcription factor family	Zm00001d034678	396	417	+	4.03e-06	TCCGTATTCGATTCGATTACAT	Zea mays
Zm00001d042609	NAC domain transcription factor family	Zm00001d034729	75	96	+	4.24e-06	TACGTATACAGCTCTCTTTCTT	Zea mays
Zm00001d042609	NAC domain transcription factor family	Zm00001d036539	329	350	+	6.06e-06	GCCGTATTCATCTCTCCATCTT	Zea mays
Zm00001d042609	NAC domain transcription factor family	Zm00001d036650	414	435	+	9.47e-06	GCCGTGTCCAATTCCTCTTCCG	Zea mays
Zm00001d042609	NAC domain transcription factor family	Zm00001d038217	241	262	-	1.42e-06	TACGTGTCATATTTGATATTTA	Zea mays
Zm00001d042609	NAC domain transcription factor family	Zm00001d038290	356	377	-	4.84e-06	TCCGTATCGAATTATACTACTT	Zea mays
Zm00001d042609	NAC domain transcription factor family	Zm00001d042005	39	60	+	5.87e-06	GACGTGTAGCTTCTGCCACCTT	Zea mays
Zm00001d042609	NAC domain transcription factor family	Zm00001d042801	257	278	+	2.32e-06	GACGTGTAGTATTTGTTTAGAT	Zea mays
Zm00001d042609	NAC domain transcription factor family	Zm00001d043121	126	147	-	9.47e-06	GACGTGTATGGCTTGGCGCCTG	Zea mays
Zm00001d042609	NAC domain transcription factor family	Zm00001d044124	473	494	-	3.13e-06	TACGTGTTGCGTTTGGATTTGT	Zea mays
Zm00001d042609	NAC domain transcription factor family	Zm00001d046184	157	178	-	3.02e-06	AGCGTGCTCGATTTGTATTCTT	Zea mays
Zm00001d042609	NAC domain transcription factor family	Zm00001d046625	475	496	+	7.31e-06	GACGTAAATAACTTGGTCACGC	Zea mays
Zm00001d042609	NAC domain transcription factor family	Zm00001d048687	300	321	+	7.9e-06	GCCGTGTAAAATACTGTATTTT	Zea mays
Zm00001d042609	NAC domain transcription factor family	Zm00001d049330	373	394	-	7.43e-06	AACGTATAATACACGATAACTT	Zea mays
Zm00001d042609	NAC domain transcription factor family	Zm00001d050302	110	131	+	5.24e-06	GACGTATTTGATTTTGCCACGG	Zea mays
Zm00001d028850	MYB12	Zm00001d000158	66	74	-	9.89e-06	ACCTACCAG	Zea mays
Zm00001d028850	MYB12	Zm00001d002258	45	53	+	6.34e-06	ACCAACCCG	Zea mays
Zm00001d028850	MYB12	Zm00001d003830	228	236	+	6.34e-06	ACCAACCCG	Zea mays
Zm00001d028850	MYB12	Zm00001d003966	458	466	+	9.89e-06	ACCTACCAG	Zea mays
Zm00001d028850	MYB12	Zm00001d004545	486	494	+	6.34e-06	ACCAACCCG	Zea mays
Zm00001d028850	MYB12	Zm00001d005080	247	255	+	6.34e-06	ACCAACCCG	Zea mays
Zm00001d028850	MYB12	Zm00001d006153	485	493	+	3.17e-06	ACCTACCCG	Zea mays
Zm00001d028850	MYB12	Zm00001d010115	339	347	-	3.17e-06	ACCTACCCG	Zea mays
Zm00001d028850	MYB12	Zm00001d012159	295	303	+	6.34e-06	ACCAACCCG	Zea mays
Zm00001d028850	MYB12	Zm00001d012780	353	361	-	3.17e-06	ACCTACCCG	Zea mays
Zm00001d028850	MYB12	Zm00001d012900	392	400	-	6.34e-06	ACCAACCCG	Zea mays
Zm00001d028850	MYB12	Zm00001d013907	366	374	-	3.17e-06	ACCTACCCG	Zea mays
Zm00001d028850	MYB12	Zm00001d018077	264	272	-	6.34e-06	ACCAACCCG	Zea mays
Zm00001d028850	MYB12	Zm00001d018181	207	215	-	9.89e-06	ACCTACCAG	Zea mays
Zm00001d028850	MYB12	Zm00001d018754	150	158	+	6.34e-06	ACCAACCCG	Zea mays
Zm00001d028850	MYB12	Zm00001d018883	306	314	+	9.89e-06	ACCTACCAG	Zea mays
Zm00001d028850	MYB12	Zm00001d019283	314	322	+	3.17e-06	ACCTACCCG	Zea mays
Zm00001d028850	MYB12	Zm00001d019432	405	413	+	6.34e-06	ACCAACCCG	Zea mays
Zm00001d028850	MYB12	Zm00001d019957	249	257	+	6.34e-06	ACCAACCCG	Zea mays
Zm00001d028850	MYB12	Zm00001d020261	323	331	+	6.34e-06	ACCAACCCG	Zea mays
Zm00001d028850	MYB12	Zm00001d020497	399	407	-	3.17e-06	ACCTACCCG	Zea mays
Zm00001d028850	MYB12	Zm00001d023530	316	324	-	6.34e-06	ACCAACCCG	Zea mays
Zm00001d028850	MYB12	Zm00001d024531	297	305	-	9.89e-06	ACCTACCAG	Zea mays
Zm00001d028850	MYB12	Zm00001d025401	311	319	+	6.34e-06	ACCAACCCG	Zea mays
Zm00001d028850	MYB12	Zm00001d025799	395	403	+	6.34e-06	ACCAACCCG	Zea mays
Zm00001d028850	MYB12	Zm00001d026306	175	183	+	3.17e-06	ACCTACCCG	Zea mays
Zm00001d028850	MYB12	Zm00001d028377	410	418	-	6.34e-06	ACCAACCCG	Zea mays
Zm00001d028850	MYB12	Zm00001d030148	455	463	-	6.34e-06	ACCAACCCG	Zea mays
Zm00001d028850	MYB12	Zm00001d030363	432	440	+	9.89e-06	ACCTACCAG	Zea mays
Zm00001d028850	MYB12	Zm00001d031734	297	305	-	9.89e-06	ACCTACCAG	Zea mays
Zm00001d028850	MYB12	Zm00001d031963	22	30	+	3.17e-06	ACCTACCCG	Zea mays
Zm00001d028850	MYB12	Zm00001d032485	32	40	+	3.17e-06	ACCTACCCG	Zea mays
Zm00001d028850	MYB12	Zm00001d033324	291	299	+	3.17e-06	ACCTACCCG	Zea mays
Zm00001d028850	MYB12	Zm00001d034130	326	334	+	6.34e-06	ACCAACCCG	Zea mays
Zm00001d028850	MYB12	Zm00001d037849	27	35	-	9.89e-06	ACCTACCAG	Zea mays
Zm00001d028850	MYB12	Zm00001d037935	269	277	+	9.89e-06	ACCTACCAG	Zea mays
Zm00001d028850	MYB12	Zm00001d049510	122	130	-	9.89e-06	ACCTACCAG	Zea mays
Zm00001d028850	MYB12	Zm00001d052843	142	150	-	6.34e-06	ACCAACCCG	Zea mays
Zm00001d028850	MYB12	Zm00001d053217	356	364	-	6.34e-06	ACCAACCCG	Zea mays
Zm00001d028850	MYB12	Zm00001d005936	102	111	-	6.91e-06	ATACCTACCC	Zea mays
Zm00001d028850	MYB12	Zm00001d013907	455	464	-	9.63e-06	CTACCTACCG	Zea mays
Zm00001d028850	MYB12	Zm00001d016103	4	13	+	1.99e-06	TTACCTACCT	Zea mays
Zm00001d028850	MYB12	Zm00001d017616	389	398	+	9.38e-07	TTACCTACCG	Zea mays
Zm00001d028850	MYB12	Zm00001d017962	446	455	+	5.97e-06	ATACCTACCT	Zea mays
Zm00001d028850	MYB12	Zm00001d021659	441	450	+	4.92e-06	ATACCTACCG	Zea mays
Zm00001d028850	MYB12	Zm00001d024664	175	184	+	2.93e-06	TTACCTACCC	Zea mays
Zm00001d028850	MYB12	Zm00001d024734	100	109	-	9.63e-06	CTACCTACCG	Zea mays
Zm00001d028850	MYB12	Zm00001d025129	175	184	-	7.96e-06	ATACCTACCA	Zea mays
Zm00001d028850	MYB12	Zm00001d027687	53	62	+	4.92e-06	ATACCTACCG	Zea mays
Zm00001d028850	MYB12	Zm00001d030363	373	382	-	9.63e-06	CTACCTACCG	Zea mays
Zm00001d028850	MYB12	Zm00001d032476	3	12	-	1.99e-06	TTACCTACCT	Zea mays
Zm00001d028850	MYB12	Zm00001d033098	461	470	+	3.98e-06	TTACCTACCA	Zea mays
Zm00001d028850	MYB12	Zm00001d034778	21	30	-	4.92e-06	ATACCTACCG	Zea mays
Zm00001d028850	MYB12	Zm00001d036521	111	120	-	1.99e-06	TTACCTACCT	Zea mays
Zm00001d028850	MYB12	Zm00001d038289	376	385	+	1.99e-06	TTACCTACCT	Zea mays
Zm00001d028850	MYB12	Zm00001d038326	222	231	-	5.97e-06	ATACCTACCT	Zea mays
Zm00001d028850	MYB12	Zm00001d039745	56	65	+	8.8e-06	GTACCTACCG	Zea mays
Zm00001d028850	MYB12	Zm00001d043480	226	235	+	3.98e-06	TTACCTACCA	Zea mays
Zm00001d028850	MYB12	Zm00001d045480	299	308	+	6.91e-06	ATACCTACCC	Zea mays
Zm00001d028850	MYB12	Zm00001d045839	138	147	+	2.93e-06	TTACCTACCC	Zea mays
Zm00001d028850	MYB12	Zm00001d046226	491	500	+	6.91e-06	ATACCTACCC	Zea mays
Zm00001d028850	MYB12	Zm00001d046234	271	280	+	4.92e-06	ATACCTACCG	Zea mays
Zm00001d028850	MYB12	Zm00001d049510	123	132	-	3.98e-06	TTACCTACCA	Zea mays
Zm00001d034457	bZIP transcription factor family	Zm00001d000230	483	494	-	2.58e-06	CGATGACGTGGC	Zea mays
Zm00001d034457	bZIP transcription factor family	Zm00001d000914	116	127	-	3.88e-06	ACCTGACGTGGG	Zea mays
Zm00001d034457	bZIP transcription factor family	Zm00001d001881	36	47	-	6.15e-06	AGCTGACGTGTC	Zea mays
Zm00001d034457	bZIP transcription factor family	Zm00001d002178	299	310	+	4.66e-08	TGCTGACGTGGC	Zea mays
Zm00001d034457	bZIP transcription factor family	Zm00001d002246	332	343	+	2.23e-07	AGCTGACGTGGC	Zea mays
Zm00001d034457	bZIP transcription factor family	Zm00001d002292	450	461	+	1.74e-06	TGCTCACGTGGA	Zea mays
Zm00001d034457	bZIP transcription factor family	Zm00001d002312	24	35	-	1.82e-06	GGGTGACGTGGC	Zea mays
Zm00001d034457	bZIP transcription factor family	Zm00001d002535	89	100	-	6.69e-06	AGGTGACGTGGA	Zea mays
Zm00001d034457	bZIP transcription factor family	Zm00001d002700	179	190	-	6.9e-07	GGCTGACGTGGA	Zea mays
Zm00001d034457	bZIP transcription factor family	Zm00001d002725	445	456	+	9.65e-06	TGCTCACGTGTC	Zea mays
Zm00001d034457	bZIP transcription factor family	Zm00001d003091	149	160	-	2.58e-06	GGATGACGTGGC	Zea mays
Zm00001d034457	bZIP transcription factor family	Zm00001d003530	337	348	-	3.25e-06	TGGTGACGTGGA	Zea mays
Zm00001d034457	bZIP transcription factor family	Zm00001d005164	369	380	-	1.82e-06	GGGTGACGTGGC	Zea mays
Zm00001d034457	bZIP transcription factor family	Zm00001d005563	157	168	+	8.58e-06	AGCCGACGTGGC	Zea mays
Zm00001d034457	bZIP transcription factor family	Zm00001d005657	407	418	+	6.9e-07	CGCTGACGTGGA	Zea mays
Zm00001d034457	bZIP transcription factor family	Zm00001d005798	309	320	+	2.23e-07	AGCTGACGTGGC	Zea mays
Zm00001d034457	bZIP transcription factor family	Zm00001d006630	81	92	-	6.04e-06	TCGTGACGTGGC	Zea mays
Zm00001d034457	bZIP transcription factor family	Zm00001d006700	431	442	-	5.12e-06	GACTGACGTGGA	Zea mays
Zm00001d034457	bZIP transcription factor family	Zm00001d008567	362	373	-	2.31e-06	TGGTGACGTGGG	Zea mays
Zm00001d034457	bZIP transcription factor family	Zm00001d008923	399	410	+	8.58e-06	CCGTGACGTGGC	Zea mays
Zm00001d034457	bZIP transcription factor family	Zm00001d009772	56	67	+	7.36e-06	CGTTGACGTGGT	Zea mays
Zm00001d034457	bZIP transcription factor family	Zm00001d010855	373	384	-	1.07e-06	TGGTGACGTGGC	Zea mays
Zm00001d034457	bZIP transcription factor family	Zm00001d011751	175	186	+	4.66e-08	TGCTGACGTGGC	Zea mays
Zm00001d034457	bZIP transcription factor family	Zm00001d013097	346	357	-	1.82e-06	CGGTGACGTGGC	Zea mays
Zm00001d034457	bZIP transcription factor family	Zm00001d013927	137	148	+	7.47e-06	TTGTGACGTGGC	Zea mays
Zm00001d034457	bZIP transcription factor family	Zm00001d014953	180	191	+	5.12e-06	TGCCGACGTGGC	Zea mays
Zm00001d034457	bZIP transcription factor family	Zm00001d015215	396	407	-	1.3e-07	CGCTGACGTGGC	Zea mays
Zm00001d034457	bZIP transcription factor family	Zm00001d015459	269	280	+	2.58e-06	CGTTGACGTGGC	Zea mays
Zm00001d034457	bZIP transcription factor family	Zm00001d016305	484	495	-	8.67e-06	GGCTGACGTGTG	Zea mays
Zm00001d034457	bZIP transcription factor family	Zm00001d017613	2	13	+	3.88e-06	TGATGACGTGGG	Zea mays
Zm00001d034457	bZIP transcription factor family	Zm00001d017616	280	291	-	5.76e-06	GGATGACGTGGG	Zea mays
Zm00001d034457	bZIP transcription factor family	Zm00001d018485	141	152	+	5.57e-06	AGGTGACGTGGG	Zea mays
Zm00001d034457	bZIP transcription factor family	Zm00001d019734	314	325	-	1.3e-07	GGCTGACGTGGC	Zea mays
Zm00001d034457	bZIP transcription factor family	Zm00001d020957	154	165	+	8.41e-07	AGCTGACGTGGT	Zea mays
Zm00001d034457	bZIP transcription factor family	Zm00001d021291	320	331	-	2.58e-06	CGATGACGTGGC	Zea mays
Zm00001d034457	bZIP transcription factor family	Zm00001d022191	383	394	-	2.23e-07	TGCTGACGTGGG	Zea mays
Zm00001d034457	bZIP transcription factor family	Zm00001d022427	80	91	+	6.04e-06	ATCTGACGTGGT	Zea mays
Zm00001d034457	bZIP transcription factor family	Zm00001d023278	168	179	-	1.63e-06	CTCTGACGTGGC	Zea mays
Zm00001d034457	bZIP transcription factor family	Zm00001d023335	278	289	+	8.41e-07	AGCTGACGTGGA	Zea mays
Zm00001d034457	bZIP transcription factor family	Zm00001d023811	428	439	-	3.25e-06	TGGTGACGTGGA	Zea mays
Zm00001d034457	bZIP transcription factor family	Zm00001d025580	298	309	-	4.1e-07	CGCTGACGTGGG	Zea mays
Zm00001d034457	bZIP transcription factor family	Zm00001d025973	406	417	-	5.12e-06	TGATGACGTGGA	Zea mays
Zm00001d034457	bZIP transcription factor family	Zm00001d026505	300	311	+	8.58e-06	AGTTGACGTGGA	Zea mays
Zm00001d034457	bZIP transcription factor family	Zm00001d026586	380	391	+	6.69e-06	AGGTGACGTGGA	Zea mays
Zm00001d034457	bZIP transcription factor family	Zm00001d026670	414	425	-	1.63e-06	TGATGACGTGGC	Zea mays
Zm00001d034457	bZIP transcription factor family	Zm00001d027456	438	449	-	8.58e-06	TGCAGACGTGGG	Zea mays
Zm00001d034457	bZIP transcription factor family	Zm00001d027593	293	304	-	6.15e-06	TGCTGACGTGTG	Zea mays
Zm00001d034457	bZIP transcription factor family	Zm00001d027768	271	282	+	2.81e-06	TTCTGACGTGGT	Zea mays
Zm00001d034457	bZIP transcription factor family	Zm00001d027982	117	128	+	7.36e-06	AGTTGACGTGGG	Zea mays
Zm00001d034457	bZIP transcription factor family	Zm00001d027988	73	84	-	2.31e-06	TGGTGACGTGGG	Zea mays
Zm00001d034457	bZIP transcription factor family	Zm00001d028167	355	366	-	6.69e-06	AGGTGACGTGGT	Zea mays
Zm00001d034457	bZIP transcription factor family	Zm00001d028230	399	410	+	7.36e-06	CGCCGACGTGGC	Zea mays
Zm00001d034457	bZIP transcription factor family	Zm00001d028391	107	118	+	7.36e-06	CGCAGACGTGGC	Zea mays
Zm00001d034457	bZIP transcription factor family	Zm00001d028454	270	281	+	7.36e-06	CGTTGACGTGGT	Zea mays
Zm00001d034457	bZIP transcription factor family	Zm00001d028649	342	353	-	7.36e-06	CGTTGACGTGGA	Zea mays
Zm00001d034457	bZIP transcription factor family	Zm00001d028669	305	316	-	5.34e-06	CCCTCACGTGGC	Zea mays
Zm00001d034457	bZIP transcription factor family	Zm00001d030091	436	447	+	4.66e-08	TGCTGACGTGGC	Zea mays
Zm00001d034457	bZIP transcription factor family	Zm00001d030614	175	186	-	2.14e-06	ATCTGACGTGGC	Zea mays
Zm00001d034457	bZIP transcription factor family	Zm00001d031688	242	253	+	8.67e-06	GGCTGACGTGTG	Zea mays
Zm00001d034457	bZIP transcription factor family	Zm00001d032292	402	413	+	6.04e-06	AACTGACGTGGA	Zea mays
Zm00001d034457	bZIP transcription factor family	Zm00001d032855	276	287	+	3.1e-06	GGCTCACGTGGA	Zea mays
Zm00001d034457	bZIP transcription factor family	Zm00001d033594	432	443	-	1.82e-06	GGGTGACGTGGC	Zea mays
Zm00001d034457	bZIP transcription factor family	Zm00001d033714	335	346	+	7.36e-06	CGCCGACGTGGC	Zea mays
Zm00001d034457	bZIP transcription factor family	Zm00001d033719	170	181	-	5.12e-06	TGATGACGTGGA	Zea mays
Zm00001d034457	bZIP transcription factor family	Zm00001d033746	406	417	-	5.57e-06	GGGTGACGTGGT	Zea mays
Zm00001d034457	bZIP transcription factor family	Zm00001d034037	413	424	+	7.36e-06	AGATGACGTGGG	Zea mays
Zm00001d034457	bZIP transcription factor family	Zm00001d034197	219	230	-	1.82e-06	GGGTGACGTGGC	Zea mays
Zm00001d034457	bZIP transcription factor family	Zm00001d034900	167	178	-	8.58e-06	TGCCGACGTGGG	Zea mays
Zm00001d034457	bZIP transcription factor family	Zm00001d036533	198	209	-	2.23e-07	AGCTGACGTGGC	Zea mays
Zm00001d034457	bZIP transcription factor family	Zm00001d036539	30	41	-	7.36e-06	CGCCGACGTGGC	Zea mays
Zm00001d034457	bZIP transcription factor family	Zm00001d037079	344	355	-	7.36e-06	CGCCGACGTGGC	Zea mays
Zm00001d034457	bZIP transcription factor family	Zm00001d037586	374	385	-	7.36e-06	CGTTGACGTGGA	Zea mays
Zm00001d034457	bZIP transcription factor family	Zm00001d037747	383	394	-	2.58e-06	GGTTGACGTGGC	Zea mays
Zm00001d034457	bZIP transcription factor family	Zm00001d037926	452	463	+	1.3e-07	CGCTGACGTGGC	Zea mays
Zm00001d034457	bZIP transcription factor family	Zm00001d038549	58	69	-	7.36e-06	GGATGACGTGGA	Zea mays
Zm00001d034457	bZIP transcription factor family	Zm00001d038991	306	317	+	9.27e-06	GGTTCACGTGGC	Zea mays
Zm00001d034457	bZIP transcription factor family	Zm00001d039222	321	332	+	9.36e-06	CGCTGACGTGAC	Zea mays
Zm00001d034457	bZIP transcription factor family	Zm00001d039468	228	239	+	1.82e-06	GGGTGACGTGGC	Zea mays
Zm00001d034457	bZIP transcription factor family	Zm00001d039573	434	445	-	5.57e-06	GGGTGACGTGGA	Zea mays
Zm00001d034457	bZIP transcription factor family	Zm00001d042848	292	303	-	5.12e-06	TGATGACGTGGA	Zea mays
Zm00001d034457	bZIP transcription factor family	Zm00001d043056	362	373	+	2.58e-06	CCCTGACGTGGG	Zea mays
Zm00001d034457	bZIP transcription factor family	Zm00001d043361	165	176	-	7.36e-06	GGATGACGTGGT	Zea mays
Zm00001d034457	bZIP transcription factor family	Zm00001d044906	238	249	+	5.57e-06	AGGTGACGTGGG	Zea mays
Zm00001d034457	bZIP transcription factor family	Zm00001d045366	132	143	+	2.58e-06	GGATGACGTGGC	Zea mays
Zm00001d034457	bZIP transcription factor family	Zm00001d046467	197	208	-	8.91e-06	TATTGACGTGGC	Zea mays
Zm00001d034457	bZIP transcription factor family	Zm00001d047829	318	329	-	9.6e-06	TTCTCACGTGGA	Zea mays
Zm00001d034457	bZIP transcription factor family	Zm00001d048802	481	492	-	7.36e-06	GGCCGACGTGGC	Zea mays
Zm00001d034457	bZIP transcription factor family	Zm00001d050514	406	417	-	5.12e-06	CTCTGACGTGGA	Zea mays
Zm00001d034457	bZIP transcription factor family	Zm00001d050716	437	448	-	7.36e-06	CGCCGACGTGGC	Zea mays
Zm00001d034457	bZIP transcription factor family	Zm00001d052247	194	205	+	1.63e-06	GTCTGACGTGGC	Zea mays
Zm00001d034457	bZIP transcription factor family	Zm00001d052927	467	478	-	5.26e-06	TGGTCACGTGGC	Zea mays
Zm00001d034457	bZIP transcription factor family	Zm00001d053236	406	417	-	5.12e-06	CTCTGACGTGGA	Zea mays
Zm00001d034457	bZIP transcription factor family	Zm00001d053981	479	490	+	1.16e-06	CCCTGACGTGGC	Zea mays
Zm00001d033859	HB,Homeobox transcription factor family	Zm00001d000143	359	378	-	2.82e-08	CTCTCTCCTCCTGCCTCTGT	Zea mays
Zm00001d033859	HB,Homeobox transcription factor family	Zm00001d000184	479	498	+	7.91e-06	CCTCCTCTCCTCTCCCCTCC	Zea mays
Zm00001d033859	HB,Homeobox transcription factor family	Zm00001d001433	74	93	+	1.16e-06	CTGGCTCTCTCCGTCTGGCC	Zea mays
Zm00001d033859	HB,Homeobox transcription factor family	Zm00001d001774	242	261	+	3.13e-06	CCGTCGATCCCTGTCGCCGC	Zea mays
Zm00001d033859	HB,Homeobox transcription factor family	Zm00001d001862	434	453	+	9.29e-06	CGCACCCTCTCTCTCTCTCC	Zea mays
Zm00001d033859	HB,Homeobox transcription factor family	Zm00001d001879	303	322	+	6.05e-06	TTCCCCCCCTCTGGCCCTCT	Zea mays
Zm00001d033859	HB,Homeobox transcription factor family	Zm00001d001943	460	479	+	7.91e-06	TCGTCCCCCCTTCGTCCTCC	Zea mays
Zm00001d033859	HB,Homeobox transcription factor family	Zm00001d002021	434	453	+	5.1e-06	CTGCCCACCTCTCCCTCGCC	Zea mays
Zm00001d033859	HB,Homeobox transcription factor family	Zm00001d002051	138	157	-	7.99e-06	CTGTCCGCCTCTCCCGGTTC	Zea mays
Zm00001d033859	HB,Homeobox transcription factor family	Zm00001d002072	435	454	+	6.31e-06	TTCTCCTGTCCTGCATCTGC	Zea mays
Zm00001d033859	HB,Homeobox transcription factor family	Zm00001d002136	62	81	+	1.82e-06	CTCCCTCGCCTCGTCTCGTC	Zea mays
Zm00001d033859	HB,Homeobox transcription factor family	Zm00001d002159	315	334	+	9.02e-06	CGCCCCGTTCCCGTCCCCGT	Zea mays
Zm00001d033859	HB,Homeobox transcription factor family	Zm00001d002288	10	29	-	6.65e-08	CTCTCTCTCTCTCTCTCTCT	Zea mays
Zm00001d033859	HB,Homeobox transcription factor family	Zm00001d002309	465	484	-	6.18e-06	CTTTCTCTCTCCGCCTGCTC	Zea mays
Zm00001d033859	HB,Homeobox transcription factor family	Zm00001d002316	414	433	+	1.34e-06	CTCTCTGGCTCTCTCCCCCC	Zea mays
Zm00001d033859	HB,Homeobox transcription factor family	Zm00001d002350	334	353	+	7.91e-06	TCCCCTCCCCTCCCCTCTAC	Zea mays
Zm00001d033859	HB,Homeobox transcription factor family	Zm00001d002402	110	129	-	6.37e-06	CTCTCTCTCTCTCTCTGCGT	Zea mays
Zm00001d033859	HB,Homeobox transcription factor family	Zm00001d002485	445	464	+	2.04e-07	CTGCCTCCCTCCCTCCCTCC	Zea mays
Zm00001d033859	HB,Homeobox transcription factor family	Zm00001d002530	296	315	+	5.74e-06	CTTCCTCTGCTCGTCCCTCG	Zea mays
Zm00001d033859	HB,Homeobox transcription factor family	Zm00001d002538	249	268	-	5.79e-07	CCGTCTCCTCCTCCTCCGGC	Zea mays
Zm00001d033859	HB,Homeobox transcription factor family	Zm00001d002700	334	353	+	3.55e-06	CTCCCTCCGCGCCCTCCTGT	Zea mays
Zm00001d033859	HB,Homeobox transcription factor family	Zm00001d003015	349	368	+	9.11e-06	GCCGCCCCCCCCCCCCCCCC	Zea mays
Zm00001d033859	HB,Homeobox transcription factor family	Zm00001d003129	468	487	+	7.93e-07	CCTCCCGTCCCCGTCCCTGT	Zea mays
Zm00001d033859	HB,Homeobox transcription factor family	Zm00001d003164	242	261	+	9.67e-06	CCCGCTCCCGCTCCCGCTCC	Zea mays
Zm00001d033859	HB,Homeobox transcription factor family	Zm00001d003219	418	437	-	2.99e-06	CTCGCTCTCCCTCGTCGTTC	Zea mays
Zm00001d033859	HB,Homeobox transcription factor family	Zm00001d003353	260	279	+	1.15e-06	TCTTCGCCCTCTGCTCCTCC	Zea mays
Zm00001d033859	HB,Homeobox transcription factor family	Zm00001d003438	406	425	+	8.41e-06	CAGCCCCCCCCCCCCCCCCC	Zea mays
Zm00001d033859	HB,Homeobox transcription factor family	Zm00001d003505	306	325	+	9.57e-06	CTCTCTCTCTCTCGATCGTC	Zea mays
Zm00001d033859	HB,Homeobox transcription factor family	Zm00001d003508	300	319	+	7.75e-06	CTCGTGCTCTCCGTCCGTTC	Zea mays
Zm00001d033859	HB,Homeobox transcription factor family	Zm00001d003538	396	415	+	5.92e-06	CTTGCCCTCCTCCCACCGCC	Zea mays
Zm00001d033859	HB,Homeobox transcription factor family	Zm00001d003614	399	418	+	2.89e-06	CCCTCCCTTCCCCGTGCTCC	Zea mays
Zm00001d033859	HB,Homeobox transcription factor family	Zm00001d003657	401	420	+	1.46e-06	CTCCCTCCCTTCCCTTCTCC	Zea mays
Zm00001d033859	HB,Homeobox transcription factor family	Zm00001d003817	412	431	+	9.86e-06	CTCTCCCTTTCTTCTTCTTC	Zea mays
Zm00001d033859	HB,Homeobox transcription factor family	Zm00001d003861	258	277	+	4.19e-06	TTCCCCCGCCCTCTCTCCCC	Zea mays
Zm00001d033859	HB,Homeobox transcription factor family	Zm00001d003945	114	133	+	4.5e-07	CCCTCTCTCTTTCCCTCTCT	Zea mays
Zm00001d033859	HB,Homeobox transcription factor family	Zm00001d003961	452	471	+	3.03e-07	TTCCCTCTCCCTCCTGCTGC	Zea mays
Zm00001d033859	HB,Homeobox transcription factor family	Zm00001d003962	384	403	-	4.34e-06	CGCTCTCTCTGTCTCTCTTG	Zea mays
Zm00001d033859	HB,Homeobox transcription factor family	Zm00001d004021	171	190	-	1.53e-06	TCCTCCTTTTCCGTCTCTGC	Zea mays
Zm00001d033859	HB,Homeobox transcription factor family	Zm00001d004055	380	399	+	7.75e-06	CAGTCTTTCCTTCTCCCGGC	Zea mays
Zm00001d033859	HB,Homeobox transcription factor family	Zm00001d004203	12	31	-	9.11e-06	CCCTTTCCCCTTTCCCCTGC	Zea mays
Zm00001d033859	HB,Homeobox transcription factor family	Zm00001d004375	14	33	-	1.31e-07	CTCGCCTCGCCTGCCTCTGC	Zea mays
Zm00001d033859	HB,Homeobox transcription factor family	Zm00001d004524	58	77	-	6.56e-07	CCCCCCCCCCCCCCCCCCCC	Zea mays
Zm00001d033859	HB,Homeobox transcription factor family	Zm00001d004734	241	260	-	7.75e-06	CAGTCGTCGCGCGCCCCTGC	Zea mays
Zm00001d033859	HB,Homeobox transcription factor family	Zm00001d004903	439	458	+	2.07e-07	TTTTCTCTCTCTCTCTCTCC	Zea mays
Zm00001d033859	HB,Homeobox transcription factor family	Zm00001d004908	453	472	+	7.07e-06	CTCTCTCCTCTCCTCTCCTC	Zea mays
Zm00001d033859	HB,Homeobox transcription factor family	Zm00001d005056	246	265	+	6.65e-08	CTCTCTCTCTCTCTCTCTCT	Zea mays
Zm00001d033859	HB,Homeobox transcription factor family	Zm00001d005080	302	321	-	2.61e-06	CTCGCTCCGGCCGCCTCTGC	Zea mays
Zm00001d033859	HB,Homeobox transcription factor family	Zm00001d005144	169	188	-	4.68e-06	CTCTCCTCCTCTCCCACGGC	Zea mays
Zm00001d033859	HB,Homeobox transcription factor family	Zm00001d005351	311	330	+	6.84e-07	TCCGCTCCCCCTCCCACTCC	Zea mays
Zm00001d033859	HB,Homeobox transcription factor family	Zm00001d005356	123	142	-	2.26e-06	CCTTCGCTTTTTGCCCCTTC	Zea mays
Zm00001d033859	HB,Homeobox transcription factor family	Zm00001d005377	77	96	+	6.24e-06	CTCTCTGCTGCTGCTCCTGC	Zea mays
Zm00001d033859	HB,Homeobox transcription factor family	Zm00001d005421	46	65	-	2.53e-07	CTCTCTCTCTCTCTCTCTTT	Zea mays
Zm00001d033859	HB,Homeobox transcription factor family	Zm00001d005578	312	331	+	4.37e-07	CTTTCTCTCTCTCTCTCTCT	Zea mays
Zm00001d033859	HB,Homeobox transcription factor family	Zm00001d005594	426	445	+	5.62e-06	CCTTCCTTCCCCTCCCCTCC	Zea mays
Zm00001d033859	HB,Homeobox transcription factor family	Zm00001d005620	109	128	+	2.76e-06	TGCTCCTTTCCTCTCCCGGC	Zea mays
Zm00001d033859	HB,Homeobox transcription factor family	Zm00001d005624	437	456	+	3.28e-08	TTCTCCCCGCCTCCCCCTCC	Zea mays
Zm00001d033859	HB,Homeobox transcription factor family	Zm00001d005654	445	464	-	8.66e-06	CGCTCGCTTCTCCTCCCGGG	Zea mays
Zm00001d033859	HB,Homeobox transcription factor family	Zm00001d005682	259	278	+	5.68e-08	CTCTCCCTCCCTCCCACTTC	Zea mays
Zm00001d033859	HB,Homeobox transcription factor family	Zm00001d005766	189	208	+	5.05e-06	CCGTCTCGCTCTCTCCCGGG	Zea mays
Zm00001d033859	HB,Homeobox transcription factor family	Zm00001d005798	286	305	-	9.48e-06	GCCTCCACTCTCGCCCCTGC	Zea mays
Zm00001d033859	HB,Homeobox transcription factor family	Zm00001d005823	446	465	+	2.69e-07	CCTTCGCCCTGCGCCCCTGC	Zea mays
Zm00001d033859	HB,Homeobox transcription factor family	Zm00001d006069	248	267	+	6.58e-06	TTGTCTCTGCCTCCTGCCGC	Zea mays
Zm00001d033859	HB,Homeobox transcription factor family	Zm00001d006078	207	226	-	5.64e-07	CGCTTTCGCCCTGCCGCTCC	Zea mays
Zm00001d033859	HB,Homeobox transcription factor family	Zm00001d006159	117	136	+	2.89e-06	CCTTCGCTTTCCGCTTCTTC	Zea mays
Zm00001d033859	HB,Homeobox transcription factor family	Zm00001d006193	239	258	+	2.57e-06	CCCTCCCCCTCCCTACCGCC	Zea mays
Zm00001d033859	HB,Homeobox transcription factor family	Zm00001d006246	351	370	+	1.24e-06	CCCTCGCCTCCCCTCCCGTC	Zea mays
Zm00001d033859	HB,Homeobox transcription factor family	Zm00001d006256	380	399	-	6.24e-06	CTCTCCTCCTCCGCTCCGCT	Zea mays
Zm00001d033859	HB,Homeobox transcription factor family	Zm00001d006297	151	170	+	7.67e-06	TCTCCGCGCTCCGCTCCTCC	Zea mays
Zm00001d033859	HB,Homeobox transcription factor family	Zm00001d006329	431	450	+	5.62e-06	CCGGCTGTCCGCCTCGCTGT	Zea mays
Zm00001d033859	HB,Homeobox transcription factor family	Zm00001d006330	97	116	+	2.69e-07	CGCGCGGGCCCCGCCGCTGC	Zea mays
Zm00001d033859	HB,Homeobox transcription factor family	Zm00001d006384	80	99	-	1.59e-06	CGCTCCGCCTCCCTCCCCGC	Zea mays
Zm00001d033859	HB,Homeobox transcription factor family	Zm00001d006447	283	302	+	4.43e-06	TTGCCCCCCCCCCCCTCTCG	Zea mays
Zm00001d033859	HB,Homeobox transcription factor family	Zm00001d006646	330	349	+	3.17e-06	CGCGCTCGCTTCGGCTCTCC	Zea mays
Zm00001d033859	HB,Homeobox transcription factor family	Zm00001d006751	479	498	+	2.11e-06	CCCTCTATCCGCCTCCCCCC	Zea mays
Zm00001d033859	HB,Homeobox transcription factor family	Zm00001d006833	466	485	+	8.41e-06	CAGCCCCCCCCCCCCCCCCC	Zea mays
Zm00001d033859	HB,Homeobox transcription factor family	Zm00001d006883	459	478	-	1.44e-06	CTGGCTCTCTCTCTCTCTTT	Zea mays
Zm00001d033859	HB,Homeobox transcription factor family	Zm00001d007187	162	181	+	9.29e-06	CGCTCCCCTCCTCCTCGGTC	Zea mays
Zm00001d033859	HB,Homeobox transcription factor family	Zm00001d007624	227	246	+	6.37e-06	CTGTTCCTTTCTGCTCCGCC	Zea mays
Zm00001d033859	HB,Homeobox transcription factor family	Zm00001d007915	356	375	-	4.34e-06	CGGCCCCGCCTCGTCCGTCC	Zea mays
Zm00001d033859	HB,Homeobox transcription factor family	Zm00001d007992	284	303	-	2.16e-06	TCCGCCGTCCCCCGTCCTGC	Zea mays
Zm00001d033859	HB,Homeobox transcription factor family	Zm00001d008205	335	354	+	6.11e-06	TGTGCCCCTCCTGCCCCCGC	Zea mays
Zm00001d033859	HB,Homeobox transcription factor family	Zm00001d008287	15	34	-	8.94e-07	TCGGCTCTGCGCCTCCCTGC	Zea mays
Zm00001d033859	HB,Homeobox transcription factor family	Zm00001d008308	321	340	-	3.32e-06	CTCGCCGGTCCTGGCTCGGC	Zea mays
Zm00001d033859	HB,Homeobox transcription factor family	Zm00001d008394	51	70	-	3.28e-06	CTGTCGTCCTCCCCTTCTCC	Zea mays
Zm00001d033859	HB,Homeobox transcription factor family	Zm00001d008427	417	436	-	3.55e-06	CGCGCTGCTTCTGCTTCTTC	Zea mays
Zm00001d033859	HB,Homeobox transcription factor family	Zm00001d008604	382	401	-	9.86e-06	CCCGCCCGGTGCGTCGCGGC	Zea mays
Zm00001d033859	HB,Homeobox transcription factor family	Zm00001d008625	70	89	-	5.4e-07	CTCTCTCCCCCTCTCCCTAT	Zea mays
Zm00001d033859	HB,Homeobox transcription factor family	Zm00001d008756	437	456	+	3.84e-06	TTCCCTTCCCTTCTCCCTCC	Zea mays
Zm00001d033859	HB,Homeobox transcription factor family	Zm00001d008800	315	334	+	8.84e-06	TGCGCCGCGCCCGTCTCCCC	Zea mays
Zm00001d033859	HB,Homeobox transcription factor family	Zm00001d008816	479	498	+	6.24e-06	TTCTCTCCTCCCGCTGCCCC	Zea mays
Zm00001d033859	HB,Homeobox transcription factor family	Zm00001d008957	186	205	-	1.12e-06	CCCTCGGCCTCTCGCCCTCC	Zea mays
Zm00001d033859	HB,Homeobox transcription factor family	Zm00001d009010	261	280	-	3.1e-06	CCGGCCCGGCCCGGCCCGGC	Zea mays
Zm00001d033859	HB,Homeobox transcription factor family	Zm00001d009071	203	222	+	8.07e-06	CGGTCCCCTTCTCTCTCCCC	Zea mays
Zm00001d033859	HB,Homeobox transcription factor family	Zm00001d009112	415	434	+	6.11e-06	CTGTCCTCTCCTCTCTCTCT	Zea mays
Zm00001d033859	HB,Homeobox transcription factor family	Zm00001d009189	367	386	+	4.29e-06	TGCTCCGGGCCTCGCCCTCC	Zea mays
Zm00001d033859	HB,Homeobox transcription factor family	Zm00001d009328	364	383	+	5.48e-07	CTCTCTATGCGCGTCCCTGT	Zea mays
Zm00001d033859	HB,Homeobox transcription factor family	Zm00001d009504	385	404	+	8.32e-06	CGGCCTCGCCTCGTCTCCCC	Zea mays
Zm00001d033859	HB,Homeobox transcription factor family	Zm00001d009603	213	232	+	4.99e-06	CTCCCCCTTTGTGTCTCGTC	Zea mays
Zm00001d033859	HB,Homeobox transcription factor family	Zm00001d009613	458	477	+	7.93e-07	CTGTTCCGCCCCGCCCCGCC	Zea mays
Zm00001d033859	HB,Homeobox transcription factor family	Zm00001d009746	304	323	+	3.17e-06	CCTGCTCCTCCTCCTGCTGC	Zea mays
Zm00001d033859	HB,Homeobox transcription factor family	Zm00001d009783	444	463	+	5.44e-06	CCCCCCACTCGCCCCTCTCC	Zea mays
Zm00001d033859	HB,Homeobox transcription factor family	Zm00001d009800	347	366	-	7.07e-06	TTCGCTCCCCTCCCCGCCGC	Zea mays
Zm00001d033859	HB,Homeobox transcription factor family	Zm00001d009945	379	398	-	3.32e-06	TCGTCCGTCCTTGTCGCTTC	Zea mays
Zm00001d033859	HB,Homeobox transcription factor family	Zm00001d010197	438	457	+	2.76e-06	TGCCCTCGCCTCGCCTCGCC	Zea mays
Zm00001d033859	HB,Homeobox transcription factor family	Zm00001d010343	406	425	+	8.94e-07	CCGGCCCGCCGTGCCCCTCT	Zea mays
Zm00001d033859	HB,Homeobox transcription factor family	Zm00001d010421	312	331	+	5.8e-06	CGTCCTCTCTCTCTCTCTAC	Zea mays
Zm00001d033859	HB,Homeobox transcription factor family	Zm00001d010543	234	253	-	1.23e-08	CTCCCTGTCCCTGCCGCTGC	Zea mays
Zm00001d033859	HB,Homeobox transcription factor family	Zm00001d010961	476	495	+	1.02e-06	CGCGCTCCTCCTCCACCTCC	Zea mays
Zm00001d033859	HB,Homeobox transcription factor family	Zm00001d011228	465	484	+	7.52e-06	TCCCTTCTCCCTCCCCCCGC	Zea mays
Zm00001d033859	HB,Homeobox transcription factor family	Zm00001d011378	387	406	-	8.83e-07	GCCTCTGCCTCTGCCTCTGC	Zea mays
Zm00001d033859	HB,Homeobox transcription factor family	Zm00001d011419	202	221	+	9.29e-06	CGCTCTCTGCTCTGCCCTGC	Zea mays
Zm00001d033859	HB,Homeobox transcription factor family	Zm00001d011571	303	322	+	1.06e-06	CCGGCGCTCCTCCCCTCGCC	Zea mays
Zm00001d033859	HB,Homeobox transcription factor family	Zm00001d011625	274	293	-	3.75e-06	CTGTTCCTCTGTGTCGCTCC	Zea mays
Zm00001d033859	HB,Homeobox transcription factor family	Zm00001d011767	302	321	+	4.58e-06	CTTTCCTTCCCTTTCCCTCC	Zea mays
Zm00001d033859	HB,Homeobox transcription factor family	Zm00001d011823	229	248	+	2.21e-06	CCTTCCATTCTTGTCTCTCC	Zea mays
Zm00001d033859	HB,Homeobox transcription factor family	Zm00001d011838	275	294	+	1.73e-06	CGCGCGCGCCGTGTCTCTCT	Zea mays
Zm00001d033859	HB,Homeobox transcription factor family	Zm00001d011958	288	307	-	4.15e-06	CTCTCTCTCTCTCTCCGGCG	Zea mays
Zm00001d033859	HB,Homeobox transcription factor family	Zm00001d012024	192	211	+	1.84e-06	CCCGCGGCTTCCGCCGCTGC	Zea mays
Zm00001d033859	HB,Homeobox transcription factor family	Zm00001d012036	419	438	+	1.35e-06	CCCGCGCGCCTCCTCCCTTC	Zea mays
Zm00001d033859	HB,Homeobox transcription factor family	Zm00001d012459	208	227	+	8.07e-06	CGGTCCCCTTCTCTCTCCCC	Zea mays
Zm00001d033859	HB,Homeobox transcription factor family	Zm00001d012482	479	498	+	1.8e-06	CGGTTCCCTCCTCCCCCTCC	Zea mays
Zm00001d033859	HB,Homeobox transcription factor family	Zm00001d012607	266	285	-	2.46e-06	CTCTCTCTCTCTCTCTCGTG	Zea mays
Zm00001d033859	HB,Homeobox transcription factor family	Zm00001d012769	20	39	-	7.6e-06	CTCTCTCGCCTTTCCTCTCT	Zea mays
Zm00001d033859	HB,Homeobox transcription factor family	Zm00001d012973	137	156	+	4.43e-06	CTCGCTGTCCGTCTCCCGTT	Zea mays
Zm00001d033859	HB,Homeobox transcription factor family	Zm00001d013033	65	84	-	3.97e-06	CCCCCTCGCCATCCCCCTCC	Zea mays
Zm00001d033859	HB,Homeobox transcription factor family	Zm00001d013042	144	163	-	1.78e-06	CGGCCCCGCCCCGCCCCTTT	Zea mays
Zm00001d033859	HB,Homeobox transcription factor family	Zm00001d013097	401	420	+	2.14e-07	CTCCCCACCTCCGCCTCTGC	Zea mays
Zm00001d033859	HB,Homeobox transcription factor family	Zm00001d013109	261	280	+	1.84e-06	CCCTCGCCGCCCCCCACTTC	Zea mays
Zm00001d033859	HB,Homeobox transcription factor family	Zm00001d013130	209	228	+	9.86e-06	CTCCCTGCGTTTGCTCCTGT	Zea mays
Zm00001d033859	HB,Homeobox transcription factor family	Zm00001d013151	301	320	+	3.88e-06	TACTCTCTCTCTCTCTCTCT	Zea mays
Zm00001d033859	HB,Homeobox transcription factor family	Zm00001d013208	102	121	+	8.93e-06	CTCCCCGTGTCTTTCCCTCC	Zea mays
Zm00001d033859	HB,Homeobox transcription factor family	Zm00001d013333	2	21	+	6.64e-06	CCCCCCCCCCCCCCCCCCAC	Zea mays
Zm00001d033859	HB,Homeobox transcription factor family	Zm00001d013468	443	462	+	2.61e-07	TCCTCTGCCCTTGCTCCTGC	Zea mays
Zm00001d033859	HB,Homeobox transcription factor family	Zm00001d013529	469	488	-	5.74e-06	CTCTCTCTCTCTCTCTGGCG	Zea mays
Zm00001d033859	HB,Homeobox transcription factor family	Zm00001d013532	479	498	+	8.15e-07	CGCCCTCGCCTCGCCTCGCC	Zea mays
Zm00001d033859	HB,Homeobox transcription factor family	Zm00001d013617	337	356	+	9.57e-06	TCCTTCCCCTCTGTCTCTCT	Zea mays
Zm00001d033859	HB,Homeobox transcription factor family	Zm00001d013706	462	481	-	1.51e-06	CGCTCCCGTCGTGTCTGTGC	Zea mays
Zm00001d033859	HB,Homeobox transcription factor family	Zm00001d013736	21	40	-	6.24e-06	TTCTCTGTTCGCGTCACTTC	Zea mays
Zm00001d033859	HB,Homeobox transcription factor family	Zm00001d013777	452	471	-	5.5e-06	CCTCCTCTCCCCGCCACTCG	Zea mays
Zm00001d033859	HB,Homeobox transcription factor family	Zm00001d013817	471	490	+	1.44e-07	CCCCTCCTCCCCGCCTCTGC	Zea mays
Zm00001d033859	HB,Homeobox transcription factor family	Zm00001d013907	290	309	+	8.49e-06	CCCGCCGTCTACCCCTCTCC	Zea mays
Zm00001d033859	HB,Homeobox transcription factor family	Zm00001d014116	159	178	+	4.68e-06	CCCCCCTCGCCTCCCCCTGT	Zea mays
Zm00001d033859	HB,Homeobox transcription factor family	Zm00001d014203	6	25	-	6.31e-06	TACCCTCTCTCTCTCTCTTC	Zea mays
Zm00001d033859	HB,Homeobox transcription factor family	Zm00001d014297	274	293	+	6.56e-07	CCCCCCCCCCCCCCCCCCCC	Zea mays
Zm00001d033859	HB,Homeobox transcription factor family	Zm00001d014405	322	341	+	3.22e-08	CTCTCTCTTTCTCTCTCTCC	Zea mays
Zm00001d033859	HB,Homeobox transcription factor family	Zm00001d014451	218	237	+	7.07e-06	CCCTCGGTCTCCCTCGCGGT	Zea mays
Zm00001d033859	HB,Homeobox transcription factor family	Zm00001d014491	355	374	+	2.46e-06	CCCGCTCGTCCTCCTCCTCT	Zea mays
Zm00001d033859	HB,Homeobox transcription factor family	Zm00001d014507	353	372	-	4.29e-06	TTTTCTCTCCCCCCCACCGC	Zea mays
Zm00001d033859	HB,Homeobox transcription factor family	Zm00001d014562	477	496	+	3.03e-06	CCCGCCATTCCTCCACCTCC	Zea mays
Zm00001d033859	HB,Homeobox transcription factor family	Zm00001d014701	355	374	-	1.67e-06	CTCTCCACCTCTCTCTCTCT	Zea mays
Zm00001d033859	HB,Homeobox transcription factor family	Zm00001d014717	296	315	+	6.56e-07	CCCGCCGTCCGCGCTTCTTC	Zea mays
Zm00001d033859	HB,Homeobox transcription factor family	Zm00001d014726	169	188	+	7.75e-06	CATTCGGTCTCTCTTTCTGC	Zea mays
Zm00001d033859	HB,Homeobox transcription factor family	Zm00001d014773	449	468	-	9.86e-06	TCTCCTCCCCCTCCCTCGGT	Zea mays
Zm00001d033859	HB,Homeobox transcription factor family	Zm00001d014778	231	250	-	7.44e-06	TGGGCGCCGCCTCCTCCTTC	Zea mays
Zm00001d033859	HB,Homeobox transcription factor family	Zm00001d014792	307	326	+	4.19e-06	TCCTCCCTGCGCCTCCCCCC	Zea mays
Zm00001d033859	HB,Homeobox transcription factor family	Zm00001d014993	242	261	+	1.24e-07	CGGCCGCTCCCCGCCCCGCC	Zea mays
Zm00001d033859	HB,Homeobox transcription factor family	Zm00001d015012	344	363	-	1.72e-07	TTCTCTCCTCCTCCTCCTCC	Zea mays
Zm00001d033859	HB,Homeobox transcription factor family	Zm00001d015215	461	480	+	1.12e-06	TTCTCCGCTCCTGCCGCGGC	Zea mays
Zm00001d033859	HB,Homeobox transcription factor family	Zm00001d015397	389	408	+	2.49e-07	CCTGCCCTCCCCGTCCGTCC	Zea mays
Zm00001d033859	HB,Homeobox transcription factor family	Zm00001d015459	318	337	+	4.06e-06	GCCTCTCTCTCCCTCCCTCT	Zea mays
Zm00001d033859	HB,Homeobox transcription factor family	Zm00001d015515	305	324	+	4.89e-06	GCCTCTCTCTCTCTCTCTCT	Zea mays
Zm00001d033859	HB,Homeobox transcription factor family	Zm00001d015721	451	470	-	9.48e-06	CCTCCTCCTCCTCCTCCTCT	Zea mays
Zm00001d033859	HB,Homeobox transcription factor family	Zm00001d016121	307	326	+	2.64e-06	TCCTCCACTCCTCCTCCTCC	Zea mays
Zm00001d033859	HB,Homeobox transcription factor family	Zm00001d016225	120	139	+	4.15e-06	CCTCCTCCTCTCCTCCCTCC	Zea mays
Zm00001d033859	HB,Homeobox transcription factor family	Zm00001d016441	159	178	-	8.93e-06	TTGTCTTTCCCTGCTGCTGG	Zea mays
Zm00001d033859	HB,Homeobox transcription factor family	Zm00001d016662	235	254	-	9.2e-06	CTGCCTGCTCGTGCCTCTAC	Zea mays
Zm00001d033859	HB,Homeobox transcription factor family	Zm00001d016675	210	229	-	8.16e-06	GCCCCCGCCTCTCCCTCTGC	Zea mays
Zm00001d033859	HB,Homeobox transcription factor family	Zm00001d016792	29	48	-	9.29e-06	GTCGCTCTCTCTCCTCGTCC	Zea mays
Zm00001d033859	HB,Homeobox transcription factor family	Zm00001d016950	303	322	+	6.56e-07	CCCCCCCCCCCCCCCCCCCC	Zea mays
Zm00001d033859	HB,Homeobox transcription factor family	Zm00001d016972	237	256	+	6.37e-06	CTCTCCGTGGCTGTTTCTGC	Zea mays
Zm00001d033859	HB,Homeobox transcription factor family	Zm00001d017119	478	497	+	1.21e-06	CCCTCTCCCCCCCCTCCCTC	Zea mays
Zm00001d033859	HB,Homeobox transcription factor family	Zm00001d017147	357	376	-	5.8e-06	CTCCCGGTTCGTCTCCCTCT	Zea mays
Zm00001d033859	HB,Homeobox transcription factor family	Zm00001d017167	444	463	+	2.76e-06	TCCTCCGTCCTCCCCCCCCC	Zea mays
Zm00001d033859	HB,Homeobox transcription factor family	Zm00001d017178	146	165	-	1.96e-06	TCCGCGCGCCCCGTCACTCC	Zea mays
Zm00001d033859	HB,Homeobox transcription factor family	Zm00001d017179	184	203	-	7.6e-06	CTGTCTCCTCCCCCTTCCTC	Zea mays
Zm00001d033859	HB,Homeobox transcription factor family	Zm00001d017186	33	52	-	8.26e-07	CGCGCGCGCCGCGTCTCGGC	Zea mays
Zm00001d033859	HB,Homeobox transcription factor family	Zm00001d017199	366	385	+	1.44e-06	GTCTCTCTCCTCGCACCTGC	Zea mays
Zm00001d033859	HB,Homeobox transcription factor family	Zm00001d017275	351	370	-	9.76e-06	TCCGCGACGCCTCCCTCGCC	Zea mays
Zm00001d033859	HB,Homeobox transcription factor family	Zm00001d017276	1	20	+	6.64e-06	CCCCCCCCCCCCCCCCCCAC	Zea mays
Zm00001d033859	HB,Homeobox transcription factor family	Zm00001d017282	442	461	-	8.66e-06	TCTGCTCCGTCCGTCCGTGC	Zea mays
Zm00001d033859	HB,Homeobox transcription factor family	Zm00001d017364	156	175	+	8.58e-06	GTCGCCGTCCTCGCCTCTCT	Zea mays
Zm00001d033859	HB,Homeobox transcription factor family	Zm00001d017380	255	274	-	9.86e-06	CAGCCTCCCTGTCTCTCTCC	Zea mays
Zm00001d033859	HB,Homeobox transcription factor family	Zm00001d017650	2	21	-	2.83e-06	CTGCCGGTGTGCGTCTCTGC	Zea mays
Zm00001d033859	HB,Homeobox transcription factor family	Zm00001d017713	406	425	+	6.65e-08	CTCTCTCTCTCTCTCTCTCT	Zea mays
Zm00001d033859	HB,Homeobox transcription factor family	Zm00001d017806	198	217	+	1.55e-06	CACCCCCTCCCTCTCCGTCC	Zea mays
Zm00001d033859	HB,Homeobox transcription factor family	Zm00001d017852	466	485	+	1.48e-06	CTCGCCGTCCTTGTTCCCGC	Zea mays
Zm00001d033859	HB,Homeobox transcription factor family	Zm00001d017866	433	452	-	9.86e-06	CCCGCCCGTCCTGCTAGTGC	Zea mays
Zm00001d033859	HB,Homeobox transcription factor family	Zm00001d017965	376	395	-	2.53e-07	CTCTCTCTCTCTCTCTCTTT	Zea mays
Zm00001d033859	HB,Homeobox transcription factor family	Zm00001d017982	477	496	+	3.08e-07	CGTTTCCTCCCCGCCTCTCC	Zea mays
Zm00001d033859	HB,Homeobox transcription factor family	Zm00001d017984	379	398	-	3.71e-06	TTCCCTCCCTCCCTCCCTGG	Zea mays
Zm00001d033859	HB,Homeobox transcription factor family	Zm00001d017994	292	311	+	3.03e-06	TGCTCTCTCTCTCTCACGCC	Zea mays
Zm00001d033859	HB,Homeobox transcription factor family	Zm00001d018247	234	253	+	8.84e-06	TCCTCTCCTCTCCCCTCCCC	Zea mays
Zm00001d033859	HB,Homeobox transcription factor family	Zm00001d018415	434	453	-	9.38e-06	CGCTCCATGCTCCTTGCTCC	Zea mays
Zm00001d033859	HB,Homeobox transcription factor family	Zm00001d018467	292	311	-	5.11e-07	CCTTCGCTGCCTCTTTCTGC	Zea mays
Zm00001d033859	HB,Homeobox transcription factor family	Zm00001d018477	175	194	-	9.55e-07	CCTTCTCTTCGCCCTTCTGC	Zea mays
Zm00001d033859	HB,Homeobox transcription factor family	Zm00001d018530	63	82	-	6.37e-06	CCGCCTCCCCTCGCCGCCGC	Zea mays
Zm00001d033859	HB,Homeobox transcription factor family	Zm00001d018535	40	59	+	1.82e-06	GGCGCCCTGCCTCTCCCTCC	Zea mays
Zm00001d033859	HB,Homeobox transcription factor family	Zm00001d018575	252	271	+	6.58e-06	GTGCCTCCCTCCCTCCCTCC	Zea mays
Zm00001d033859	HB,Homeobox transcription factor family	Zm00001d018687	263	282	-	9.18e-07	CTCTCCTTCCCCTTCCCTGC	Zea mays
Zm00001d033859	HB,Homeobox transcription factor family	Zm00001d018691	445	464	+	2.29e-06	TTCTCTTCTCCTGCTCCGGC	Zea mays
Zm00001d033859	HB,Homeobox transcription factor family	Zm00001d018701	480	499	-	9.76e-06	TCGGCCACCTCTGCACCTGC	Zea mays
Zm00001d033859	HB,Homeobox transcription factor family	Zm00001d018727	476	495	-	6.93e-06	CTGGCCTGCCCTGCCCCGGG	Zea mays
Zm00001d033859	HB,Homeobox transcription factor family	Zm00001d019044	481	500	-	1.71e-06	TTCTCCGTCCCTGCCGGTGT	Zea mays
Zm00001d033859	HB,Homeobox transcription factor family	Zm00001d019091	382	401	-	4.1e-06	TTCTCTCCTCGCGCTTGTCC	Zea mays
Zm00001d033859	HB,Homeobox transcription factor family	Zm00001d019122	328	347	-	1.65e-06	CTTTCCCTCCCTCCTCCCTC	Zea mays
Zm00001d033859	HB,Homeobox transcription factor family	Zm00001d019311	2	21	-	9.76e-06	CCCTCCGCCCCCCGTCCTCG	Zea mays
Zm00001d033859	HB,Homeobox transcription factor family	Zm00001d019358	429	448	+	7.37e-06	CGCCTCCGCTCCGCCCCGCC	Zea mays
Zm00001d033859	HB,Homeobox transcription factor family	Zm00001d019432	417	436	+	4.34e-06	CACCCCCCCCCCCCCCCCCC	Zea mays
Zm00001d033859	HB,Homeobox transcription factor family	Zm00001d019445	477	496	-	4.83e-07	CTCTCTGTCTCCGTCTCGCT	Zea mays
Zm00001d033859	HB,Homeobox transcription factor family	Zm00001d019479	317	336	+	8.49e-06	TCGTTTCCTCGTGTCCCTCC	Zea mays
Zm00001d033859	HB,Homeobox transcription factor family	Zm00001d019542	477	496	+	7.37e-06	CTCTCCTCTCTTCCCTCTCT	Zea mays
Zm00001d033859	HB,Homeobox transcription factor family	Zm00001d019750	325	344	-	5.74e-06	CTGTCTGCCCGCCTTCCTAC	Zea mays
Zm00001d033859	HB,Homeobox transcription factor family	Zm00001d020133	469	488	+	8.93e-06	GTCTCTTGCTCTCTCCCTCC	Zea mays
Zm00001d033859	HB,Homeobox transcription factor family	Zm00001d020147	168	187	-	9.38e-06	TCGTCTCTTTTTCCCACTGC	Zea mays
Zm00001d033859	HB,Homeobox transcription factor family	Zm00001d020267	17	36	+	6.21e-07	CCGCCCGTCCCCGTCCGTCC	Zea mays
Zm00001d033859	HB,Homeobox transcription factor family	Zm00001d020378	48	67	+	1.02e-06	TTGTCTCTTCCCGCCCGGCC	Zea mays
Zm00001d033859	HB,Homeobox transcription factor family	Zm00001d020405	440	459	+	2.03e-06	TCTTCTCTCCCCCGTCCTCC	Zea mays
Zm00001d033859	HB,Homeobox transcription factor family	Zm00001d020457	382	401	+	7.29e-06	TCTCCCGGCCCTGTTTCTCC	Zea mays
Zm00001d033859	HB,Homeobox transcription factor family	Zm00001d020492	397	416	+	8.84e-06	TTCCCTCCTCCTGCTTGGGC	Zea mays
Zm00001d033859	HB,Homeobox transcription factor family	Zm00001d020495	72	91	-	3.36e-06	CCCCCCCCCCCTCGCTCTCT	Zea mays
Zm00001d033859	HB,Homeobox transcription factor family	Zm00001d020552	435	454	+	9.48e-06	CTTCCTCCCTCCCTCCCGCT	Zea mays
Zm00001d033859	HB,Homeobox transcription factor family	Zm00001d020614	251	270	+	2.83e-06	CACCCTCCTCCTCCTCCTCC	Zea mays
Zm00001d033859	HB,Homeobox transcription factor family	Zm00001d020631	465	484	+	7.75e-06	CTGCCCACCTGCGCTTCTCC	Zea mays
Zm00001d033859	HB,Homeobox transcription factor family	Zm00001d020714	35	54	+	2.06e-06	CGGGCCCTCCTCCCTCCTGT	Zea mays
Zm00001d033859	HB,Homeobox transcription factor family	Zm00001d020826	474	493	+	2.07e-08	CTCTCTCTCTCTGTCTCTCT	Zea mays
Zm00001d033859	HB,Homeobox transcription factor family	Zm00001d020877	333	352	-	8.26e-07	CCCCCCCCCCCCCCCCCGGT	Zea mays
Zm00001d033859	HB,Homeobox transcription factor family	Zm00001d020887	62	81	-	5.92e-06	CGCGTCGTCCCCGGCCCGGC	Zea mays
Zm00001d033859	HB,Homeobox transcription factor family	Zm00001d021000	252	271	+	7.83e-06	CCCTCCGTCCCTGTCGCCTT	Zea mays
Zm00001d033859	HB,Homeobox transcription factor family	Zm00001d021025	53	72	-	5.16e-06	CTCGCTCGCCTCGTTCGGCC	Zea mays
Zm00001d033859	HB,Homeobox transcription factor family	Zm00001d021176	458	477	-	4.34e-06	CGCGCGCTCTCTCTCTGTGT	Zea mays
Zm00001d033859	HB,Homeobox transcription factor family	Zm00001d021192	109	128	-	3.06e-06	TTCTCTCTTTCCCTCCCTTT	Zea mays
Zm00001d033859	HB,Homeobox transcription factor family	Zm00001d021303	287	306	+	3.84e-06	CCCGCCCCCCCCGCACGGCC	Zea mays
Zm00001d033859	HB,Homeobox transcription factor family	Zm00001d021494	446	465	+	7.91e-06	CCGTTGCGTCCCGTCCCTTC	Zea mays
Zm00001d033859	HB,Homeobox transcription factor family	Zm00001d021518	287	306	+	4.37e-07	CTCGCGCTTCGCGTCTCGGC	Zea mays
Zm00001d033859	HB,Homeobox transcription factor family	Zm00001d021583	480	499	-	9.48e-06	CGCTCCCTGCGCGCAACGGC	Zea mays
Zm00001d033859	HB,Homeobox transcription factor family	Zm00001d021654	393	412	+	2.61e-06	TCTTCTCTCTCTCTCTCTCT	Zea mays
Zm00001d033859	HB,Homeobox transcription factor family	Zm00001d021825	133	152	-	7.6e-06	TCGGCCCCGTCTCTCCCGCC	Zea mays
Zm00001d033859	HB,Homeobox transcription factor family	Zm00001d021882	268	287	+	8.49e-06	TCTCCGGCCTGCGCCCCTGC	Zea mays
Zm00001d033859	HB,Homeobox transcription factor family	Zm00001d021896	76	95	+	7.83e-06	CCGCCTCTTCCCCTCCCCTC	Zea mays
Zm00001d033859	HB,Homeobox transcription factor family	Zm00001d021899	267	286	+	7.07e-06	CCGCCGCCTTCTGCTGCTGC	Zea mays
Zm00001d033859	HB,Homeobox transcription factor family	Zm00001d021929	173	192	-	4.1e-06	CTCTCTTCCTCTCTTCCTCT	Zea mays
Zm00001d033859	HB,Homeobox transcription factor family	Zm00001d021949	101	120	-	6.65e-08	CTCTCTCTCTCTCTCTCTCT	Zea mays
Zm00001d033859	HB,Homeobox transcription factor family	Zm00001d022005	433	452	+	9.67e-06	CCTTCGCTTTCTTTCCCTGC	Zea mays
Zm00001d033859	HB,Homeobox transcription factor family	Zm00001d022041	190	209	-	4.78e-06	TTTCCTCGTTCCGTCTCTGC	Zea mays
Zm00001d033859	HB,Homeobox transcription factor family	Zm00001d022192	390	409	+	2.46e-06	CTGCCTGCCCCTGCCACTGT	Zea mays
Zm00001d033859	HB,Homeobox transcription factor family	Zm00001d022234	277	296	+	6.37e-06	TCCTCCGCCTCCCGCCCGGC	Zea mays
Zm00001d033859	HB,Homeobox transcription factor family	Zm00001d022250	228	247	-	6.84e-07	CCCTCTCCCTCCCTCTCGTC	Zea mays
Zm00001d033859	HB,Homeobox transcription factor family	Zm00001d022380	465	484	+	7.62e-07	CCTTCTCTCTCTCTCTCTCT	Zea mays
Zm00001d033859	HB,Homeobox transcription factor family	Zm00001d022427	289	308	-	3.32e-06	TTCTCTCTCCGTCTCCGGTC	Zea mays
Zm00001d033859	HB,Homeobox transcription factor family	Zm00001d022582	424	443	-	9.2e-06	CTCTGTCTCCCTCTCCCTTG	Zea mays
Zm00001d033859	HB,Homeobox transcription factor family	Zm00001d022590	477	496	-	5.56e-06	CCCGCCGGCCCCGCTCCCTC	Zea mays
Zm00001d033859	HB,Homeobox transcription factor family	Zm00001d023208	26	45	+	6.18e-06	CGCGCCCGCCGCCGCTCTTC	Zea mays
Zm00001d033859	HB,Homeobox transcription factor family	Zm00001d023278	412	431	-	2.11e-06	CCTTCTCTTCCTGCTTCTCG	Zea mays
Zm00001d033859	HB,Homeobox transcription factor family	Zm00001d023385	425	444	+	2.18e-06	CGGGCCGTGCCTGGCCCGGC	Zea mays
Zm00001d033859	HB,Homeobox transcription factor family	Zm00001d023453	113	132	-	7.67e-06	CTTCTTCTTCCTCCTCCTCC	Zea mays
Zm00001d033859	HB,Homeobox transcription factor family	Zm00001d023646	408	427	-	4.53e-06	CTCGCTCTCTCCGCAGCTGG	Zea mays
Zm00001d033859	HB,Homeobox transcription factor family	Zm00001d023664	481	500	+	2.77e-07	TTCTCGCCGCCCGTCCCGCC	Zea mays
Zm00001d033859	HB,Homeobox transcription factor family	Zm00001d023720	345	364	-	8.32e-06	CTTGCGGCGTCTGTCTCTGT	Zea mays
Zm00001d033859	HB,Homeobox transcription factor family	Zm00001d024204	440	459	+	7.83e-07	CTCTCCATCTCTCTCTCTCT	Zea mays
Zm00001d033859	HB,Homeobox transcription factor family	Zm00001d024268	70	89	+	9.29e-06	CGCCCTCCCCTCCTTGCGGC	Zea mays
Zm00001d033859	HB,Homeobox transcription factor family	Zm00001d024527	304	323	+	7.07e-06	CTGTCCCTTTCTCCCCGTCG	Zea mays
Zm00001d033859	HB,Homeobox transcription factor family	Zm00001d024531	399	418	+	2.18e-06	TTCTTCCTTCCTCCTCCTCC	Zea mays
Zm00001d033859	HB,Homeobox transcription factor family	Zm00001d024664	256	275	+	7.83e-07	CCGTCTCCTCTCGTTCCTCC	Zea mays
Zm00001d033859	HB,Homeobox transcription factor family	Zm00001d024665	292	311	+	4.68e-06	TTGCCTCCTCCTCCACCTGC	Zea mays
Zm00001d033859	HB,Homeobox transcription factor family	Zm00001d024804	118	137	+	1.24e-06	CTCGCCATCTCTCTCTCTGT	Zea mays
Zm00001d033859	HB,Homeobox transcription factor family	Zm00001d025016	308	327	+	2.89e-06	CTCTCCCGTTCCCCCTCCCC	Zea mays
Zm00001d033859	HB,Homeobox transcription factor family	Zm00001d025065	162	181	+	8.94e-07	TTCCTCCTCCCCCTCCCTGC	Zea mays
Zm00001d033859	HB,Homeobox transcription factor family	Zm00001d025200	471	490	-	7e-06	CCCCCCCCCCCCCCACCCCC	Zea mays
Zm00001d033859	HB,Homeobox transcription factor family	Zm00001d025263	1	20	+	6.18e-06	CGGTCCCCCTCTCTAGCTCC	Zea mays
Zm00001d033859	HB,Homeobox transcription factor family	Zm00001d025281	425	444	+	5.44e-06	CACCCCCTCTCTCTCTCTCT	Zea mays
Zm00001d033859	HB,Homeobox transcription factor family	Zm00001d025305	461	480	+	4.83e-06	CCGTTCCTTCTCCCCTCTCC	Zea mays
Zm00001d033859	HB,Homeobox transcription factor family	Zm00001d025437	430	449	-	3.32e-06	TTCTCTCTCTCTCCTCCGAC	Zea mays
Zm00001d033859	HB,Homeobox transcription factor family	Zm00001d025761	331	350	-	4.94e-06	CCTGCCCTCCCCGGTCGTCC	Zea mays
Zm00001d033859	HB,Homeobox transcription factor family	Zm00001d025798	140	159	+	3.1e-06	CCGGCCCGGCCCGGCCCGGC	Zea mays
Zm00001d033859	HB,Homeobox transcription factor family	Zm00001d025799	138	157	-	5.92e-06	TCTGCTCCTCTTCCCTCTCC	Zea mays
Zm00001d033859	HB,Homeobox transcription factor family	Zm00001d025905	273	292	-	8.66e-06	CCCCCGCGGCTCCTCTCTTC	Zea mays
Zm00001d033859	HB,Homeobox transcription factor family	Zm00001d026018	436	455	-	9.48e-06	CTTTCTCTCTCTGCAGCTCG	Zea mays
Zm00001d033859	HB,Homeobox transcription factor family	Zm00001d026126	450	469	-	6.37e-06	CTCTCTCTCTCTGCTACCGT	Zea mays
Zm00001d033859	HB,Homeobox transcription factor family	Zm00001d026197	165	184	-	8.24e-06	CTGGCTGCCTGCGGCGCTGC	Zea mays
Zm00001d033859	HB,Homeobox transcription factor family	Zm00001d026203	104	123	-	7.52e-06	TCTGCCCTCTGCGGCTCTGC	Zea mays
Zm00001d033859	HB,Homeobox transcription factor family	Zm00001d026248	366	385	+	5.05e-06	CCGCCGCCGTCCCTTCCTGC	Zea mays
Zm00001d033859	HB,Homeobox transcription factor family	Zm00001d026252	420	439	+	2.01e-06	CTTCCTCCCCCCTCCCCTGC	Zea mays
Zm00001d033859	HB,Homeobox transcription factor family	Zm00001d026255	277	296	+	2.08e-06	CGCTCTCGCCCCCTCCGCGC	Zea mays
Zm00001d033859	HB,Homeobox transcription factor family	Zm00001d026258	230	249	+	1.18e-07	CTCTCCCTCCCCCCACCGCC	Zea mays
Zm00001d033859	HB,Homeobox transcription factor family	Zm00001d026366	353	372	+	6.85e-06	CCCCCTTTCTCCGGCTCGGC	Zea mays
Zm00001d033859	HB,Homeobox transcription factor family	Zm00001d026657	336	355	+	5.74e-06	CCGTCCATCCCTGTTGCCGC	Zea mays
Zm00001d033859	HB,Homeobox transcription factor family	Zm00001d026662	323	342	+	1.32e-06	CCCTCCCCTCCCCTCCCTTT	Zea mays
Zm00001d033859	HB,Homeobox transcription factor family	Zm00001d027361	472	491	+	4.06e-06	TTGTCCCTTTTCCCTCCTCC	Zea mays
Zm00001d033859	HB,Homeobox transcription factor family	Zm00001d027423	381	400	-	1.89e-06	CCCCCCCCCCCCCCCCCCTC	Zea mays
Zm00001d033859	HB,Homeobox transcription factor family	Zm00001d027550	315	334	-	8.32e-06	CTCTCTCTTCGTGGTGGTGC	Zea mays
Zm00001d033859	HB,Homeobox transcription factor family	Zm00001d027630	414	433	+	7.22e-06	CGCTCTCTCCCCCCATCCCT	Zea mays
Zm00001d033859	HB,Homeobox transcription factor family	Zm00001d027708	313	332	-	2.79e-06	CCCTGCCCGCCTGCCCCGGC	Zea mays
Zm00001d033859	HB,Homeobox transcription factor family	Zm00001d027729	178	197	-	4.76e-07	CCCCCTCTCTCTGTCTCTGG	Zea mays
Zm00001d033859	HB,Homeobox transcription factor family	Zm00001d027749	376	395	+	5.68e-06	CGGCCCGGGCCCCTCCCGGC	Zea mays
Zm00001d033859	HB,Homeobox transcription factor family	Zm00001d027873	446	465	-	9.38e-06	CCCTTCCCCTTCGCCCCCGC	Zea mays
Zm00001d033859	HB,Homeobox transcription factor family	Zm00001d027934	167	186	+	6.93e-07	CTGTCCATCCCTCCATCTCC	Zea mays
Zm00001d033859	HB,Homeobox transcription factor family	Zm00001d027947	376	395	+	3.57e-07	CTCTCTCTCTCTCTCTCGCT	Zea mays
Zm00001d033859	HB,Homeobox transcription factor family	Zm00001d027949	360	379	+	3.57e-07	CTCTCTCTCTCTCTCTCGCT	Zea mays
Zm00001d033859	HB,Homeobox transcription factor family	Zm00001d027992	362	381	+	1.13e-06	CGCGCGCGGCCTCCCCGTGC	Zea mays
Zm00001d033859	HB,Homeobox transcription factor family	Zm00001d028294	132	151	+	8.32e-06	CGCCGTCTTCCCCTCCCTCC	Zea mays
Zm00001d033859	HB,Homeobox transcription factor family	Zm00001d028311	358	377	+	1.37e-06	CGTGCTCGTCCCGTCCCGGC	Zea mays
Zm00001d033859	HB,Homeobox transcription factor family	Zm00001d028497	232	251	-	4.99e-06	CTGTCGCGTTGTGCCTGTGC	Zea mays
Zm00001d033859	HB,Homeobox transcription factor family	Zm00001d028562	36	55	-	6.93e-06	CGCTCGCTGCCCTGCTCTGC	Zea mays
Zm00001d033859	HB,Homeobox transcription factor family	Zm00001d028616	438	457	-	5.38e-06	TTTGCCCCTCTCGCTCCTCC	Zea mays
Zm00001d033859	HB,Homeobox transcription factor family	Zm00001d028662	168	187	-	5.18e-07	CCCTCCACGCCCGCCTCGCC	Zea mays
Zm00001d033859	HB,Homeobox transcription factor family	Zm00001d028704	114	133	+	2.4e-06	CGCGCCCGCTCCGTCTCTCG	Zea mays
Zm00001d033859	HB,Homeobox transcription factor family	Zm00001d028711	10	29	+	5.98e-06	CTCCCCGTCCCCGTCGCCGT	Zea mays
Zm00001d033859	HB,Homeobox transcription factor family	Zm00001d028811	19	38	+	1.95e-07	CTCTCTCTCTCTCTCTCTCG	Zea mays
Zm00001d033859	HB,Homeobox transcription factor family	Zm00001d028815	218	237	-	4.13e-07	CCCTCTGCGTCCGCCCCTGT	Zea mays
Zm00001d033859	HB,Homeobox transcription factor family	Zm00001d028879	354	373	+	6.71e-06	TTCTCCCGGCCCTCTCCTGC	Zea mays
Zm00001d033859	HB,Homeobox transcription factor family	Zm00001d028903	184	203	-	3.03e-06	TTTTCCCGGCCTCCCCCTCT	Zea mays
Zm00001d033859	HB,Homeobox transcription factor family	Zm00001d028968	371	390	-	9.57e-06	GCGTCTCGCTCTGGCTCTGC	Zea mays
Zm00001d033859	HB,Homeobox transcription factor family	Zm00001d028999	388	407	-	3.24e-06	CCCCCGGCCCCCGCCCCGGG	Zea mays
Zm00001d033859	HB,Homeobox transcription factor family	Zm00001d029051	431	450	+	4.92e-08	CCTTCTCTCTCTCTCTCTGC	Zea mays
Zm00001d033859	HB,Homeobox transcription factor family	Zm00001d029246	429	448	+	2.32e-06	CCTTCTTTTCCCCCTCCTCC	Zea mays
Zm00001d033859	HB,Homeobox transcription factor family	Zm00001d029331	450	469	+	1.12e-06	CACTCTGCCCCTGTCCCTAC	Zea mays
Zm00001d033859	HB,Homeobox transcription factor family	Zm00001d029365	213	232	-	1.59e-06	CCCTCTCGTTTTCTCTCTCC	Zea mays
Zm00001d033859	HB,Homeobox transcription factor family	Zm00001d029459	71	90	+	9.11e-06	CTGTCTGTTTCTGTCTCTAT	Zea mays
Zm00001d033859	HB,Homeobox transcription factor family	Zm00001d029497	429	448	+	7.67e-06	CTCCGGCCCCCCGCCTCGCC	Zea mays
Zm00001d033859	HB,Homeobox transcription factor family	Zm00001d029602	359	378	+	2.96e-06	CTGGCGGGGCCCGCCTCTCT	Zea mays
Zm00001d033859	HB,Homeobox transcription factor family	Zm00001d029662	412	431	+	1.69e-09	CTCTCTCTCTCTCTCTCTGC	Zea mays
Zm00001d033859	HB,Homeobox transcription factor family	Zm00001d029762	448	467	+	1.56e-07	CTGCCTCTCCCTCCCTCTCT	Zea mays
Zm00001d033859	HB,Homeobox transcription factor family	Zm00001d029996	357	376	-	8.16e-06	TTGTCCGGTCCTGGCGCTGC	Zea mays
Zm00001d033859	HB,Homeobox transcription factor family	Zm00001d030086	314	333	+	7e-06	CGTGCCCCTCCTCTCCCTAC	Zea mays
Zm00001d033859	HB,Homeobox transcription factor family	Zm00001d030108	233	252	+	9.11e-06	TCCTCTCTCTCTCTCTGGGT	Zea mays
Zm00001d033859	HB,Homeobox transcription factor family	Zm00001d030858	424	443	-	5.11e-07	CTCTCTCTCTCTCTCTGTGT	Zea mays
Zm00001d033859	HB,Homeobox transcription factor family	Zm00001d030939	270	289	+	1.53e-06	CGTTCTCTCCCCGTCTCCGT	Zea mays
Zm00001d033859	HB,Homeobox transcription factor family	Zm00001d030999	436	455	+	7.14e-06	CCCCGTCTCTCTCTCTCTCC	Zea mays
Zm00001d033859	HB,Homeobox transcription factor family	Zm00001d031189	398	417	+	5.04e-07	CGGTCTCTCCTTCCACCTCC	Zea mays
Zm00001d033859	HB,Homeobox transcription factor family	Zm00001d031196	382	401	+	3.13e-06	TCCCCCCTTCCTCCACCTCC	Zea mays
Zm00001d033859	HB,Homeobox transcription factor family	Zm00001d031527	373	392	+	8.49e-06	TTTTCTCCTCCTCCCTCGCT	Zea mays
Zm00001d033859	HB,Homeobox transcription factor family	Zm00001d031655	476	495	+	8.93e-06	CGCCCTTTTCCCCTCTCTCT	Zea mays
Zm00001d033859	HB,Homeobox transcription factor family	Zm00001d031734	92	111	-	9.2e-06	CGCTCTTCCCTTCCTCCCGC	Zea mays
Zm00001d033859	HB,Homeobox transcription factor family	Zm00001d031899	414	433	+	6.78e-06	GTCGCTGTTCTCCCCTCTGC	Zea mays
Zm00001d033859	HB,Homeobox transcription factor family	Zm00001d032069	370	389	-	1.29e-06	CGTGCCCTCCCCTCCCCTGC	Zea mays
Zm00001d033859	HB,Homeobox transcription factor family	Zm00001d032152	134	153	+	2.18e-06	CTCGCTGTCCGTGTCTGTCT	Zea mays
Zm00001d033859	HB,Homeobox transcription factor family	Zm00001d032265	443	462	+	6.44e-06	CCGGCCTCCCTTGCTCCGGC	Zea mays
Zm00001d033859	HB,Homeobox transcription factor family	Zm00001d032268	415	434	+	2.99e-06	TTCTCCCTCTCCCTCCCGCG	Zea mays
Zm00001d033859	HB,Homeobox transcription factor family	Zm00001d032363	421	440	+	8.41e-06	TTCTCCCTTCTTTCTCCTGC	Zea mays
Zm00001d033859	HB,Homeobox transcription factor family	Zm00001d032458	285	304	+	7.83e-06	CCCGCGGTGCCCCCACGTGC	Zea mays
Zm00001d033859	HB,Homeobox transcription factor family	Zm00001d032552	295	314	+	1.24e-06	CTCTCGCCTCCCGTCCCCTC	Zea mays
Zm00001d033859	HB,Homeobox transcription factor family	Zm00001d032685	378	397	-	1.98e-07	TGCGCTCTCTCTCTCTCTCC	Zea mays
Zm00001d033859	HB,Homeobox transcription factor family	Zm00001d032855	201	220	-	7.14e-06	CCGTCGCCTCCTCTCCCCTC	Zea mays
Zm00001d033859	HB,Homeobox transcription factor family	Zm00001d033090	320	339	-	5.98e-06	CTCCCTGCTCCCGCCGCTCG	Zea mays
Zm00001d033859	HB,Homeobox transcription factor family	Zm00001d033091	14	33	-	8.83e-07	CCTCCTCCTCCTCTCCCTCC	Zea mays
Zm00001d033859	HB,Homeobox transcription factor family	Zm00001d033395	91	110	-	9.18e-07	CTCTCTCTCTCTCTCGCTTT	Zea mays
Zm00001d033859	HB,Homeobox transcription factor family	Zm00001d033463	206	225	-	2.14e-07	TCCGCCCTCTCTCTCTCTCC	Zea mays
Zm00001d033859	HB,Homeobox transcription factor family	Zm00001d033510	346	365	-	3.21e-06	CCCCCCCCCCCCCCCCCGTT	Zea mays
Zm00001d033859	HB,Homeobox transcription factor family	Zm00001d033714	202	221	+	1.44e-06	CTCCCCGTTCCCGGCCCGGC	Zea mays
Zm00001d033859	HB,Homeobox transcription factor family	Zm00001d033772	187	206	+	2.76e-06	CTCTCTCTCTCTTTCTCTCT	Zea mays
Zm00001d033859	HB,Homeobox transcription factor family	Zm00001d033898	331	350	-	3.8e-06	CACTCTAGCTCTCTCTCTCC	Zea mays
Zm00001d033859	HB,Homeobox transcription factor family	Zm00001d033925	255	274	+	4.63e-07	CTCTCCATTTCTGTTTCTGC	Zea mays
Zm00001d033859	HB,Homeobox transcription factor family	Zm00001d033932	257	276	+	4.01e-06	CCGCCGCCGCTTCCTCCTGC	Zea mays
Zm00001d033859	HB,Homeobox transcription factor family	Zm00001d034145	131	150	+	6.47e-07	CCCTCTCGCCGCCTCCGTCC	Zea mays
Zm00001d033859	HB,Homeobox transcription factor family	Zm00001d034179	228	247	+	2.55e-06	CGCGCTCCCTCCCGCCCGCC	Zea mays
Zm00001d033859	HB,Homeobox transcription factor family	Zm00001d034365	146	165	+	1.8e-06	GTGTCCGTGCCCCCCTCTGC	Zea mays
Zm00001d033859	HB,Homeobox transcription factor family	Zm00001d034420	466	485	+	2.01e-06	CTCCCTCTCCTCCCCACGCC	Zea mays
Zm00001d033859	HB,Homeobox transcription factor family	Zm00001d034425	84	103	-	4.38e-06	CCGGCTCGCCTCCTTCCTTC	Zea mays
Zm00001d033859	HB,Homeobox transcription factor family	Zm00001d034453	444	463	+	4.94e-06	CCTCCTCGTCCCGCTGCTGC	Zea mays
Zm00001d033859	HB,Homeobox transcription factor family	Zm00001d034461	444	463	+	4.94e-06	CCTCCTCGTCCCGCTGCTGC	Zea mays
Zm00001d033859	HB,Homeobox transcription factor family	Zm00001d034488	405	424	-	4.48e-06	TTCTCTGGCCCTGGCCCGGT	Zea mays
Zm00001d033859	HB,Homeobox transcription factor family	Zm00001d034538	407	426	+	8.24e-06	TGCTCGCGCCGCCCTCCTCT	Zea mays
Zm00001d033859	HB,Homeobox transcription factor family	Zm00001d034586	180	199	+	1.16e-06	CTCGCCGTCCTCCTCTCTCT	Zea mays
Zm00001d033859	HB,Homeobox transcription factor family	Zm00001d034705	199	218	+	8.58e-06	CCGGCCACGTCCCCTCCTCC	Zea mays
Zm00001d033859	HB,Homeobox transcription factor family	Zm00001d034763	325	344	+	4.1e-06	CCGGCTGGCCCTCCCTCTTT	Zea mays
Zm00001d033859	HB,Homeobox transcription factor family	Zm00001d034779	123	142	-	5.8e-06	CGGTCCCGGCCTCCCTGTGT	Zea mays
Zm00001d033859	HB,Homeobox transcription factor family	Zm00001d034807	420	439	+	9.18e-07	CTCCCGTTCTCCGCTCCTCC	Zea mays
Zm00001d033859	HB,Homeobox transcription factor family	Zm00001d034991	410	429	+	1.01e-06	CCTTCCCTCCCCGTCTCCTC	Zea mays
Zm00001d033859	HB,Homeobox transcription factor family	Zm00001d035007	434	453	+	1.69e-09	CTCTCTCTCTCTCTCTCTGC	Zea mays
Zm00001d033859	HB,Homeobox transcription factor family	Zm00001d035080	239	258	-	7.07e-06	CGTTTTCTCCGTGTCTCTCT	Zea mays
Zm00001d033859	HB,Homeobox transcription factor family	Zm00001d035457	318	337	+	1.03e-06	CTGTCTCTCCTCTCCTCTCC	Zea mays
Zm00001d033859	HB,Homeobox transcription factor family	Zm00001d035503	247	266	+	2.67e-06	CCGGCGCTCCTCGCTCCCGC	Zea mays
Zm00001d033859	HB,Homeobox transcription factor family	Zm00001d035515	93	112	+	9.57e-06	CGCTCTCTGTGCCTTCCCCC	Zea mays
Zm00001d033859	HB,Homeobox transcription factor family	Zm00001d035629	235	254	+	1.44e-06	CCGTCTCTCTTTGCCTGGGC	Zea mays
Zm00001d033859	HB,Homeobox transcription factor family	Zm00001d035689	18	37	+	2.18e-06	CGGGCCGTGCCTGGCCCGGC	Zea mays
Zm00001d033859	HB,Homeobox transcription factor family	Zm00001d035925	139	158	+	2.34e-06	CTGCCGTTCTCCGCCCCGCC	Zea mays
Zm00001d033859	HB,Homeobox transcription factor family	Zm00001d036164	108	127	-	1.35e-06	CGGTCCGTCTCCGTCGCGCC	Zea mays
Zm00001d033859	HB,Homeobox transcription factor family	Zm00001d036175	331	350	+	1.82e-06	CGGCCTGGGCCTGCCCCGCC	Zea mays
Zm00001d033859	HB,Homeobox transcription factor family	Zm00001d036224	415	434	+	1.15e-07	CCCTCCGCCCTTCCCTCTCC	Zea mays
Zm00001d033859	HB,Homeobox transcription factor family	Zm00001d036230	136	155	-	5.05e-06	CGTCCCGTCCTTCCCCGTGC	Zea mays
Zm00001d033859	HB,Homeobox transcription factor family	Zm00001d036345	112	131	+	3.1e-06	CCGGCCCGGCCCGGCCCGGC	Zea mays
Zm00001d033859	HB,Homeobox transcription factor family	Zm00001d036416	414	433	+	8.16e-06	CCGGCGCCCTGCCCCTCTCT	Zea mays
Zm00001d033859	HB,Homeobox transcription factor family	Zm00001d036533	415	434	+	3.75e-06	CGCCCGCCTCCCGCCCCGCT	Zea mays
Zm00001d033859	HB,Homeobox transcription factor family	Zm00001d036550	417	436	-	6.51e-06	CTCTCTCTCTCTTCCCCCTC	Zea mays
Zm00001d033859	HB,Homeobox transcription factor family	Zm00001d036650	77	96	+	2.73e-07	CCGCCCCGCCCCGCCCCGCC	Zea mays
Zm00001d033859	HB,Homeobox transcription factor family	Zm00001d036901	340	359	+	2.34e-06	CCTGCTCTCTGCGCTGCTGC	Zea mays
Zm00001d033859	HB,Homeobox transcription factor family	Zm00001d037059	401	420	-	1.82e-06	CTCTCCCTTCCTGCTTCTAT	Zea mays
Zm00001d033859	HB,Homeobox transcription factor family	Zm00001d037061	432	451	+	1.44e-06	CCCTCGTCTCTCGTCCCTGC	Zea mays
Zm00001d033859	HB,Homeobox transcription factor family	Zm00001d037181	391	410	+	3.36e-06	TCCTCTCTCCGTCTCCGTCT	Zea mays
Zm00001d033859	HB,Homeobox transcription factor family	Zm00001d037229	304	323	+	6.56e-07	CCCCCCCCCCCCCCCCCCCC	Zea mays
Zm00001d033859	HB,Homeobox transcription factor family	Zm00001d037515	408	427	+	6.93e-06	TTTCCCCTCTCTCTCTCTCT	Zea mays
Zm00001d033859	HB,Homeobox transcription factor family	Zm00001d037521	98	117	-	8.32e-06	CTCTCGCGTCTCCTCTCCCC	Zea mays
Zm00001d033859	HB,Homeobox transcription factor family	Zm00001d037691	358	377	+	1.95e-08	CTGTCCCTCCCCGTTCCGGC	Zea mays
Zm00001d033859	HB,Homeobox transcription factor family	Zm00001d037849	470	489	-	1.73e-06	TGCGCCGCCCCTGCCCCGGT	Zea mays
Zm00001d033859	HB,Homeobox transcription factor family	Zm00001d037854	13	32	-	2.76e-06	CCTCCCCTCCCCTCCCCTCC	Zea mays
Zm00001d033859	HB,Homeobox transcription factor family	Zm00001d037913	152	171	+	7.44e-06	CGCGTTGCTCGTCCCCCTGC	Zea mays
Zm00001d033859	HB,Homeobox transcription factor family	Zm00001d038049	423	442	+	5.5e-06	CCCTGTCCGCCTCCTCCTCC	Zea mays
Zm00001d033859	HB,Homeobox transcription factor family	Zm00001d038051	428	447	+	7.91e-06	CAGGCTGCCCCTCCCTCCGC	Zea mays
Zm00001d033859	HB,Homeobox transcription factor family	Zm00001d038122	395	414	+	2.4e-06	TGCTCTGTTCTCCCTCCTCC	Zea mays
Zm00001d033859	HB,Homeobox transcription factor family	Zm00001d038126	123	142	+	2.03e-06	CTCTCTCGGCCTCGTCCTTC	Zea mays
Zm00001d033859	HB,Homeobox transcription factor family	Zm00001d038229	427	446	+	4.68e-06	CCCCCCGCCTCCGTCTCCCC	Zea mays
Zm00001d033859	HB,Homeobox transcription factor family	Zm00001d038262	481	500	+	2.57e-07	CACTCCCTGCCTGCCCCTCT	Zea mays
Zm00001d033859	HB,Homeobox transcription factor family	Zm00001d038291	11	30	+	8.32e-06	CCTCCGCCCCGCGCTTCGCC	Zea mays
Zm00001d033859	HB,Homeobox transcription factor family	Zm00001d038337	417	436	-	1.53e-06	CCCTCTCTCTCCGCTCCTAT	Zea mays
Zm00001d033859	HB,Homeobox transcription factor family	Zm00001d038450	198	217	-	1.1e-06	CCCTCTCTCTCTCTCTCTTG	Zea mays
Zm00001d033859	HB,Homeobox transcription factor family	Zm00001d038451	413	432	+	2.93e-06	CCCTCCCCTCCCGCCCCCGG	Zea mays
Zm00001d033859	HB,Homeobox transcription factor family	Zm00001d038467	22	41	-	6.58e-06	TCTCCTGGCCGTCCCCCTCC	Zea mays
Zm00001d033859	HB,Homeobox transcription factor family	Zm00001d038551	191	210	-	2.79e-06	CTCTCCAGCTCTCCTCCTGT	Zea mays
Zm00001d033859	HB,Homeobox transcription factor family	Zm00001d038562	422	441	+	9.2e-06	CCTGCTCCTCCCCCTCCCGC	Zea mays
Zm00001d033859	HB,Homeobox transcription factor family	Zm00001d038616	367	386	+	1.25e-06	TTGTCTCCCCCCGCCCCCGT	Zea mays
Zm00001d033859	HB,Homeobox transcription factor family	Zm00001d038698	394	413	-	5.92e-06	GTTCCTGTTCCCGCCCCTCC	Zea mays
Zm00001d033859	HB,Homeobox transcription factor family	Zm00001d038739	105	124	+	4.19e-07	CGGTCTCGCCTCGCCTCGCC	Zea mays
Zm00001d033859	HB,Homeobox transcription factor family	Zm00001d038850	477	496	-	6.51e-06	CTGCCCTCCCCTCCCTCTGG	Zea mays
Zm00001d033859	HB,Homeobox transcription factor family	Zm00001d038878	1	20	+	6.65e-08	CTCTCTCTCTCTCTCTCTCT	Zea mays
Zm00001d033859	HB,Homeobox transcription factor family	Zm00001d038991	440	459	+	8.84e-06	CCCCCCGTCTCCGTCTCCGT	Zea mays
Zm00001d033859	HB,Homeobox transcription factor family	Zm00001d039070	223	242	+	5.1e-06	CTTTCGCCCCCTGTTTCGGG	Zea mays
Zm00001d033859	HB,Homeobox transcription factor family	Zm00001d039180	473	492	+	2.61e-06	CAGTCTCTCTCTCTCTCTCT	Zea mays
Zm00001d033859	HB,Homeobox transcription factor family	Zm00001d039245	197	216	-	1.24e-06	CTCTCTCTCTCTTTCTCTTC	Zea mays
Zm00001d033859	HB,Homeobox transcription factor family	Zm00001d039267	475	494	+	4.63e-06	CCTTCTCTTTCCGCTTCCGC	Zea mays
Zm00001d033859	HB,Homeobox transcription factor family	Zm00001d039355	361	380	+	3.88e-08	CCCTCGCTCCCTGCCTCCCC	Zea mays
Zm00001d033859	HB,Homeobox transcription factor family	Zm00001d039384	25	44	+	4.58e-06	TCCCTCCTCCGCCCCCCTCC	Zea mays
Zm00001d033859	HB,Homeobox transcription factor family	Zm00001d039416	380	399	-	4.01e-06	TGCTCCGACCCCGTCCCTCC	Zea mays
Zm00001d033859	HB,Homeobox transcription factor family	Zm00001d039468	249	268	+	3.71e-06	GCCTCCCTTTCCGTCCCGGC	Zea mays
Zm00001d033859	HB,Homeobox transcription factor family	Zm00001d039532	443	462	+	1.61e-06	CCCTCTCTCCTTCCTTGTTC	Zea mays
Zm00001d033859	HB,Homeobox transcription factor family	Zm00001d039678	387	406	+	9.86e-08	CCCTCGCTCCCTGCTGCGGC	Zea mays
Zm00001d033859	HB,Homeobox transcription factor family	Zm00001d039702	320	339	+	9.96e-06	CGGTCGCTCTCCGTCCCCTT	Zea mays
Zm00001d033859	HB,Homeobox transcription factor family	Zm00001d039769	257	276	+	7.29e-06	CCGCATCTCCCTCCCTCTGC	Zea mays
Zm00001d033859	HB,Homeobox transcription factor family	Zm00001d039772	58	77	-	2.7e-06	CGCTCTCTTCTTCTTCGTCC	Zea mays
Zm00001d033859	HB,Homeobox transcription factor family	Zm00001d039825	475	494	+	1.78e-06	CGCCCCCCGCCTCCTCCGCC	Zea mays
Zm00001d033859	HB,Homeobox transcription factor family	Zm00001d039880	224	243	+	5.8e-06	CCGCCCCTCCGCGCCGCGGT	Zea mays
Zm00001d033859	HB,Homeobox transcription factor family	Zm00001d039914	328	347	+	8.49e-06	TTGTCCCCGCGTGTCACGGC	Zea mays
Zm00001d033859	HB,Homeobox transcription factor family	Zm00001d039933	400	419	-	1.96e-06	TGCGCGTTGCCTGCTCCTGC	Zea mays
Zm00001d033859	HB,Homeobox transcription factor family	Zm00001d040010	395	414	-	2.13e-06	CCCCCGCTCCTCGCCGCTCT	Zea mays
Zm00001d033859	HB,Homeobox transcription factor family	Zm00001d040047	193	212	+	4.94e-06	CACGCTCCTCCCCCCTCTCT	Zea mays
Zm00001d033859	HB,Homeobox transcription factor family	Zm00001d040212	143	162	-	2.89e-06	CCTGCCCGCTCCGCCCCGTC	Zea mays
Zm00001d033859	HB,Homeobox transcription factor family	Zm00001d040318	217	236	-	8.93e-06	CCCTGTGTTCCTCCCTCGGC	Zea mays
Zm00001d033859	HB,Homeobox transcription factor family	Zm00001d040670	306	325	-	2.53e-07	CTCTCTCTCTCTCTCTCTTT	Zea mays
Zm00001d033859	HB,Homeobox transcription factor family	Zm00001d041383	295	314	+	7.99e-06	CCCTCTCCTCCTTTCCGTCC	Zea mays
Zm00001d033859	HB,Homeobox transcription factor family	Zm00001d041407	274	293	+	7.14e-06	CTCGCCCTTTCTGTCTGTCG	Zea mays
Zm00001d033859	HB,Homeobox transcription factor family	Zm00001d041580	366	385	+	1.35e-06	CTCTCTATCTCTCTCTCCCC	Zea mays
Zm00001d033859	HB,Homeobox transcription factor family	Zm00001d041719	161	180	+	7.52e-06	CTCCTCATCCGCGCCCCGCC	Zea mays
Zm00001d033859	HB,Homeobox transcription factor family	Zm00001d041838	358	377	+	1.86e-07	CCGGCTCCCTCCCTCTCTGC	Zea mays
Zm00001d033859	HB,Homeobox transcription factor family	Zm00001d042049	475	494	-	2.38e-07	CTCTCTCTCTCTCCCCCCTC	Zea mays
Zm00001d033859	HB,Homeobox transcription factor family	Zm00001d042056	191	210	+	4.01e-06	CCTTCTCGTTCTCTCCCGCC	Zea mays
Zm00001d033859	HB,Homeobox transcription factor family	Zm00001d042095	276	295	+	9.29e-06	CCCTCTCTCCGTCCCACTAT	Zea mays
Zm00001d033859	HB,Homeobox transcription factor family	Zm00001d042182	461	480	+	3.03e-06	CCGCCGCTCTCTCTCTCTCT	Zea mays
Zm00001d033859	HB,Homeobox transcription factor family	Zm00001d042225	66	85	-	5.68e-06	TCTCCTCCTCCTCCTCCTCC	Zea mays
Zm00001d033859	HB,Homeobox transcription factor family	Zm00001d042257	410	429	-	2.29e-06	CTGTCTTTTCCTGTCCCTTT	Zea mays
Zm00001d033859	HB,Homeobox transcription factor family	Zm00001d042268	379	398	+	4.83e-06	TGGGCTCCTCCTCTCTCGCC	Zea mays
Zm00001d033859	HB,Homeobox transcription factor family	Zm00001d042274	264	283	-	6.04e-07	TGCGCCCGTCCTGCTCCTGC	Zea mays
Zm00001d033859	HB,Homeobox transcription factor family	Zm00001d042275	222	241	-	6.51e-06	TTTCCCCGTCGCGTCCCTCC	Zea mays
Zm00001d033859	HB,Homeobox transcription factor family	Zm00001d042437	191	210	+	2.21e-06	TCCTCTCCTTCTCCCTCTGT	Zea mays
Zm00001d033859	HB,Homeobox transcription factor family	Zm00001d042533	449	468	+	6.84e-07	CTCTCTCCTCTCGTTGCTGC	Zea mays
Zm00001d033859	HB,Homeobox transcription factor family	Zm00001d042727	170	189	-	6.18e-06	CCCTCTATCCGCGCTGCGTC	Zea mays
Zm00001d033859	HB,Homeobox transcription factor family	Zm00001d042948	216	235	+	7.75e-06	CCTCCTGTTTCCGCTCCGGC	Zea mays
Zm00001d033859	HB,Homeobox transcription factor family	Zm00001d042950	424	443	+	9.11e-06	CACCCCCGTCCCGTCCGTCC	Zea mays
Zm00001d033859	HB,Homeobox transcription factor family	Zm00001d042974	213	232	-	5.64e-07	CTCCCCCACCCTGCCCCTCC	Zea mays
Zm00001d033859	HB,Homeobox transcription factor family	Zm00001d043137	135	154	+	9.31e-07	CTGCCTCTCCCTCCCGCCGC	Zea mays
Zm00001d033859	HB,Homeobox transcription factor family	Zm00001d043157	171	190	-	4.58e-06	CGGCCTCCCTCTGCTGCTTC	Zea mays
Zm00001d033859	HB,Homeobox transcription factor family	Zm00001d043168	249	268	-	9.02e-06	CTCGCTCCGGCTGCCCGTGC	Zea mays
Zm00001d033859	HB,Homeobox transcription factor family	Zm00001d043178	362	381	+	1.76e-06	TCCTCGGCTCCTCCTCCTCC	Zea mays
Zm00001d033859	HB,Homeobox transcription factor family	Zm00001d043233	362	381	+	5.62e-06	GGCTCCCTTCCTCCTCCTTC	Zea mays
Zm00001d033859	HB,Homeobox transcription factor family	Zm00001d043258	315	334	+	4.34e-06	CACCCCCCCCCCCCCCCCCC	Zea mays
Zm00001d033859	HB,Homeobox transcription factor family	Zm00001d043338	446	465	+	5.38e-06	TGCCTTGTCCCTCTCTCTCC	Zea mays
Zm00001d033859	HB,Homeobox transcription factor family	Zm00001d043405	284	303	+	5.27e-06	CGCCCCCTCTCCCTTTCCGC	Zea mays
Zm00001d033859	HB,Homeobox transcription factor family	Zm00001d043411	423	442	+	3.28e-06	CCTTCCCTTCTCGCTTCGCC	Zea mays
Zm00001d033859	HB,Homeobox transcription factor family	Zm00001d043490	402	421	+	6.65e-08	CTCTCTCTCTCTCTCTCTCT	Zea mays
Zm00001d033859	HB,Homeobox transcription factor family	Zm00001d043586	311	330	+	6.93e-06	CGCGCCCCGCCCCGCCCCGC	Zea mays
Zm00001d033859	HB,Homeobox transcription factor family	Zm00001d043713	275	294	+	3.71e-06	CTGTCTGTCCCCTCCCCCGC	Zea mays
Zm00001d033859	HB,Homeobox transcription factor family	Zm00001d043798	440	459	-	3.06e-06	CTCTCCCTCCGTCTCTGTTT	Zea mays
Zm00001d033859	HB,Homeobox transcription factor family	Zm00001d043830	354	373	+	5.93e-09	CGCTCTCTCTCTCTCTCTGC	Zea mays
Zm00001d033859	HB,Homeobox transcription factor family	Zm00001d043837	441	460	+	6.51e-06	CCCCCCCCCCCCCCCACCCC	Zea mays
Zm00001d033859	HB,Homeobox transcription factor family	Zm00001d043854	108	127	-	2.99e-07	CTTTCTCCCTCTCTTCCTCC	Zea mays
Zm00001d033859	HB,Homeobox transcription factor family	Zm00001d043871	217	236	+	9.29e-06	TTGTCTCCCTCCCGCCCCGC	Zea mays
Zm00001d033859	HB,Homeobox transcription factor family	Zm00001d043994	383	402	+	7e-06	CTCTCCCCCCCCCCCAGCCC	Zea mays
Zm00001d033859	HB,Homeobox transcription factor family	Zm00001d044024	433	452	+	6.93e-06	GCCGCCAGGCCCGCCCCTGC	Zea mays
Zm00001d033859	HB,Homeobox transcription factor family	Zm00001d044272	274	293	+	6.65e-08	CTCTCTCTCTCTCTCTCTCT	Zea mays
Zm00001d033859	HB,Homeobox transcription factor family	Zm00001d044289	242	261	+	6.74e-07	CTGTCTCTTCCCCGTCCTCC	Zea mays
Zm00001d033859	HB,Homeobox transcription factor family	Zm00001d044309	174	193	+	4.83e-07	CTCCCGATCCCTGCCCCCGC	Zea mays
Zm00001d033859	HB,Homeobox transcription factor family	Zm00001d044368	132	151	-	7.99e-06	CCGGCCGCCCTTGCCCCTTG	Zea mays
Zm00001d033859	HB,Homeobox transcription factor family	Zm00001d044584	430	449	+	9.48e-06	GCCTCGAGCCCTCCTCCTGC	Zea mays
Zm00001d033859	HB,Homeobox transcription factor family	Zm00001d044654	318	337	-	4.58e-06	CGCTCTCCGTTCCTCCGTCC	Zea mays
Zm00001d033859	HB,Homeobox transcription factor family	Zm00001d044666	335	354	-	4.19e-06	TTTTCTCTCTCTCTCTCTTT	Zea mays
Zm00001d033859	HB,Homeobox transcription factor family	Zm00001d044691	406	425	+	8.26e-07	CCCGCCAGCCCTGCCACTGC	Zea mays
Zm00001d033859	HB,Homeobox transcription factor family	Zm00001d044717	310	329	+	9.76e-06	CCTTCCCGGCCCCTCGCTCT	Zea mays
Zm00001d033859	HB,Homeobox transcription factor family	Zm00001d044734	294	313	+	2.33e-08	CTTTCGCTCTCCGCCTCTCC	Zea mays
Zm00001d033859	HB,Homeobox transcription factor family	Zm00001d044812	420	439	+	4.63e-06	CCCTCCCCTCCCCCTCGTGT	Zea mays
Zm00001d033859	HB,Homeobox transcription factor family	Zm00001d044923	442	461	+	4.34e-06	CACCCCCCCCCCCCCCCCCC	Zea mays
Zm00001d033859	HB,Homeobox transcription factor family	Zm00001d045051	214	233	-	2.79e-06	CCCCCCCCCCCCGCCTCCCT	Zea mays
Zm00001d033859	HB,Homeobox transcription factor family	Zm00001d045191	364	383	+	2.61e-06	CACTCCCGCCTCGCCCCCGC	Zea mays
Zm00001d033859	HB,Homeobox transcription factor family	Zm00001d045220	427	446	+	5.98e-06	CTTTCTGTGCTCGTTACTGC	Zea mays
Zm00001d033859	HB,Homeobox transcription factor family	Zm00001d045340	302	321	-	7.52e-07	TTTTCTGCCCCTGCTCCTTC	Zea mays
Zm00001d033859	HB,Homeobox transcription factor family	Zm00001d045395	95	114	+	4.94e-06	TTGTCTGTCTCTCTCTCTTT	Zea mays
Zm00001d033859	HB,Homeobox transcription factor family	Zm00001d045459	436	455	-	3.51e-06	CGCGCCGCTTCTGCTGCTGC	Zea mays
Zm00001d033859	HB,Homeobox transcription factor family	Zm00001d046004	255	274	-	7.52e-06	TCGCCCTTCCCTCCCTCTGT	Zea mays
Zm00001d033859	HB,Homeobox transcription factor family	Zm00001d046234	249	268	-	8.32e-06	TGCCCCTTCTTTCTCCCTGC	Zea mays
Zm00001d033859	HB,Homeobox transcription factor family	Zm00001d046346	463	482	+	3.97e-06	CTCCCTCCCCATCCCCCTTC	Zea mays
Zm00001d033859	HB,Homeobox transcription factor family	Zm00001d046438	413	432	-	3.39e-06	TCCTCTCTCTCTCTCTCCTC	Zea mays
Zm00001d033859	HB,Homeobox transcription factor family	Zm00001d046467	451	470	+	3.93e-06	TCTTCTCTCTTCCCCCCTGT	Zea mays
Zm00001d033859	HB,Homeobox transcription factor family	Zm00001d046468	88	107	+	3.28e-06	CTCTTCCCTTCCCCTCCTGC	Zea mays
Zm00001d033859	HB,Homeobox transcription factor family	Zm00001d046632	20	39	-	8.93e-06	CTCTCTCTGCCTCTACGTAC	Zea mays
Zm00001d033859	HB,Homeobox transcription factor family	Zm00001d046652	239	258	+	4.78e-06	TCCTCCAGCTCTGCTGCTGC	Zea mays
Zm00001d033859	HB,Homeobox transcription factor family	Zm00001d046852	390	409	+	8.07e-06	CCTCCTCGCCTCGCCGCGCC	Zea mays
Zm00001d033859	HB,Homeobox transcription factor family	Zm00001d046945	298	317	+	5.38e-06	TTCCCTACCCCTCTCTCTCT	Zea mays
Zm00001d033859	HB,Homeobox transcription factor family	Zm00001d046981	402	421	+	5.56e-06	CCTTCTCTCTCTTTCCCTTC	Zea mays
Zm00001d033859	HB,Homeobox transcription factor family	Zm00001d047104	183	202	+	5.16e-06	TACTCCCTCCTCGTCTCCGC	Zea mays
Zm00001d033859	HB,Homeobox transcription factor family	Zm00001d047209	387	406	-	4.48e-06	CTGCCCGTCCGTCCTCCTCT	Zea mays
Zm00001d033859	HB,Homeobox transcription factor family	Zm00001d047276	162	181	+	4.43e-06	TTTCCTCCCTCCCTCCCTTC	Zea mays
Zm00001d033859	HB,Homeobox transcription factor family	Zm00001d047334	292	311	+	4.37e-07	CTTTCTCTGTCTGCCTGTCC	Zea mays
Zm00001d033859	HB,Homeobox transcription factor family	Zm00001d047440	400	419	+	8.32e-06	CCGCCGCTGCGTGCCACGGC	Zea mays
Zm00001d033859	HB,Homeobox transcription factor family	Zm00001d047452	338	357	+	5.98e-06	CGGGCGGCCTGCGTTCCTCC	Zea mays
Zm00001d033859	HB,Homeobox transcription factor family	Zm00001d047584	89	108	+	6.21e-07	CTCTCCATTTCTGCCTCTGT	Zea mays
Zm00001d033859	HB,Homeobox transcription factor family	Zm00001d047615	306	325	+	1.07e-07	CGCGCGGTCCTTGTCCCTCC	Zea mays
Zm00001d033859	HB,Homeobox transcription factor family	Zm00001d047664	388	407	+	2.9e-07	CCCTCCCCTCCCCTCCCTGT	Zea mays
Zm00001d033859	HB,Homeobox transcription factor family	Zm00001d047671	170	189	-	7.83e-06	CCCCCCCCCCCCCCCTGTTT	Zea mays
Zm00001d033859	HB,Homeobox transcription factor family	Zm00001d047675	417	436	+	5.78e-08	TTCTCTCCCTCCCTCCCTCC	Zea mays
Zm00001d033859	HB,Homeobox transcription factor family	Zm00001d047701	434	453	-	6.85e-06	CGTGCCCCCCGCCTCCCTGG	Zea mays
Zm00001d033859	HB,Homeobox transcription factor family	Zm00001d047758	432	451	+	9.48e-06	CAGCCGCCGCCCGCCCGTCC	Zea mays
Zm00001d033859	HB,Homeobox transcription factor family	Zm00001d047789	409	428	+	2.52e-06	CCCGCCCGCCTCCCTTCTTC	Zea mays
Zm00001d033859	HB,Homeobox transcription factor family	Zm00001d047814	479	498	+	5.92e-06	CCGCCCGCCCCCGCCTCCTC	Zea mays
Zm00001d033859	HB,Homeobox transcription factor family	Zm00001d047837	347	366	-	4.29e-06	CGTTCTCGTCTCCCTCCTCC	Zea mays
Zm00001d033859	HB,Homeobox transcription factor family	Zm00001d047908	217	236	-	4.53e-06	CCCCTCCTCCCTCTCTCTCT	Zea mays
Zm00001d033859	HB,Homeobox transcription factor family	Zm00001d048021	331	350	+	5.96e-07	CTCGCTCGCCGCGCCGCGCC	Zea mays
Zm00001d033859	HB,Homeobox transcription factor family	Zm00001d048263	311	330	+	2.32e-06	TTGCCTTCCCCTGCCCCGCC	Zea mays
Zm00001d033859	HB,Homeobox transcription factor family	Zm00001d048533	250	269	+	9.29e-06	CCTTCCCTTCCCTTCCCTTC	Zea mays
Zm00001d033859	HB,Homeobox transcription factor family	Zm00001d048647	104	123	-	3.24e-06	CTCGCTTCCCCTCCTCCGTC	Zea mays
Zm00001d033859	HB,Homeobox transcription factor family	Zm00001d048947	57	76	+	2.73e-07	CCCTCTTCCCCCGCCACTGC	Zea mays
Zm00001d033859	HB,Homeobox transcription factor family	Zm00001d049121	407	426	-	7.51e-08	CCCTCGCTCTCTCCTTCTCC	Zea mays
Zm00001d033859	HB,Homeobox transcription factor family	Zm00001d049127	479	498	-	6.93e-06	TTCTCTATTTGTGCTCCGGC	Zea mays
Zm00001d033859	HB,Homeobox transcription factor family	Zm00001d049303	87	106	-	7.67e-06	TTCTTCGTCCTCCTCCCTTC	Zea mays
Zm00001d033859	HB,Homeobox transcription factor family	Zm00001d049381	428	447	+	7.14e-06	TGGCCGGTTTCTGTCTCTCC	Zea mays
Zm00001d033859	HB,Homeobox transcription factor family	Zm00001d049443	371	390	+	4.34e-06	CACTCTCTTTCTCTCTCTCT	Zea mays
Zm00001d033859	HB,Homeobox transcription factor family	Zm00001d049494	200	219	+	4.76e-07	CGCTCTCGCCCCGCCAGTGC	Zea mays
Zm00001d033859	HB,Homeobox transcription factor family	Zm00001d049510	296	315	-	7.22e-06	CGCGCCCGGCCTCCCTCGAC	Zea mays
Zm00001d033859	HB,Homeobox transcription factor family	Zm00001d049545	366	385	+	3.28e-06	TCCCCTCTTCTCCCTCCTCC	Zea mays
Zm00001d033859	HB,Homeobox transcription factor family	Zm00001d049713	224	243	-	4.58e-06	CCCCCCCCCCCCCTTCGTTC	Zea mays
Zm00001d033859	HB,Homeobox transcription factor family	Zm00001d049742	120	139	+	2.61e-07	TTCTCTCTGCTCGCCTCGCC	Zea mays
Zm00001d033859	HB,Homeobox transcription factor family	Zm00001d049769	453	472	+	3.32e-06	CCGCCCGCCCCTCCCTCGTC	Zea mays
Zm00001d033859	HB,Homeobox transcription factor family	Zm00001d049870	308	327	+	1.84e-06	CACTCCCTCTCTCTCCCTAC	Zea mays
Zm00001d033859	HB,Homeobox transcription factor family	Zm00001d050106	417	436	-	3.17e-07	CTCTCTCTCTCCGCATGTGC	Zea mays
Zm00001d033859	HB,Homeobox transcription factor family	Zm00001d050148	209	228	+	4.43e-07	CTCGCCCCCTTTCCCCCGGC	Zea mays
Zm00001d033859	HB,Homeobox transcription factor family	Zm00001d050179	107	126	-	1.21e-06	CTCTCTCTCTCTCTCTCTAT	Zea mays
Zm00001d033859	HB,Homeobox transcription factor family	Zm00001d050259	440	459	-	2.03e-06	TTGGCTCCCCGCCTCCCGCC	Zea mays
Zm00001d033859	HB,Homeobox transcription factor family	Zm00001d050334	164	183	-	5.48e-07	CCCTCCCTGCTCGCCGCGCC	Zea mays
Zm00001d033859	HB,Homeobox transcription factor family	Zm00001d050341	218	237	+	4.63e-06	CTCTCGGTCCCTCCCACCTC	Zea mays
Zm00001d033859	HB,Homeobox transcription factor family	Zm00001d050798	450	469	+	7.44e-06	GGCGCTGGCCCTCCTCCTCC	Zea mays
Zm00001d033859	HB,Homeobox transcription factor family	Zm00001d051053	53	72	-	2.26e-06	CCGGCGGTGCGTGTCGCTGC	Zea mays
Zm00001d033859	HB,Homeobox transcription factor family	Zm00001d051085	284	303	+	7.64e-08	CTCTCTCTCTCTCTTGCTGC	Zea mays
Zm00001d033859	HB,Homeobox transcription factor family	Zm00001d051468	214	233	+	4.99e-06	GCTGCTCTCTCTGCTTCTGC	Zea mays
Zm00001d033859	HB,Homeobox transcription factor family	Zm00001d051513	164	183	+	9.86e-06	TTCCCCATCCCCGTCCCCGT	Zea mays
Zm00001d033859	HB,Homeobox transcription factor family	Zm00001d051653	400	419	+	4.94e-06	CCGCCCCTTCCTCTTCCTCT	Zea mays
Zm00001d033859	HB,Homeobox transcription factor family	Zm00001d051675	379	398	-	2.32e-06	CTCTCTCTCTTTTCCCCTTC	Zea mays
Zm00001d033859	HB,Homeobox transcription factor family	Zm00001d051754	22	41	+	6.56e-07	CCCCCCCCCCCCCCCCCCCC	Zea mays
Zm00001d033859	HB,Homeobox transcription factor family	Zm00001d051810	390	409	+	6.37e-06	GTCTCTCTCTCTCTCTCTCG	Zea mays
Zm00001d033859	HB,Homeobox transcription factor family	Zm00001d051836	345	364	-	4.58e-06	TTCTTCTTCCCTGTCCCTGT	Zea mays
Zm00001d033859	HB,Homeobox transcription factor family	Zm00001d051977	189	208	+	3.03e-06	CTCTCGCCTCGCCTACCTCC	Zea mays
Zm00001d033859	HB,Homeobox transcription factor family	Zm00001d052118	96	115	-	1.84e-06	TGCTCTCGCTCTGCCGGTGC	Zea mays
Zm00001d033859	HB,Homeobox transcription factor family	Zm00001d052136	47	66	-	2.53e-07	CTCTCTCTCTCTCTCTCTTT	Zea mays
Zm00001d033859	HB,Homeobox transcription factor family	Zm00001d052137	407	426	+	6.18e-06	CGCGCCGTTTCCCTCCCGTC	Zea mays
Zm00001d033859	HB,Homeobox transcription factor family	Zm00001d052165	140	159	+	3.13e-06	TTTTCCGCCCCTGTCTCCCC	Zea mays
Zm00001d033859	HB,Homeobox transcription factor family	Zm00001d052244	371	390	+	5.86e-06	CTCGCGATCTCTCCTCCGTC	Zea mays
Zm00001d033859	HB,Homeobox transcription factor family	Zm00001d052245	209	228	-	3.75e-06	CCCTCCCTTCTCTTCCCTCC	Zea mays
Zm00001d033859	HB,Homeobox transcription factor family	Zm00001d052545	169	188	+	3.28e-06	TGGGCTCTCTCTCTCTCTCT	Zea mays
Zm00001d033859	HB,Homeobox transcription factor family	Zm00001d052564	475	494	-	6.44e-06	CTGTCGCGCCTTGTCGCTCG	Zea mays
Zm00001d033859	HB,Homeobox transcription factor family	Zm00001d052585	350	369	+	2.18e-06	CGCTCTAGGTCCGCCCCTGT	Zea mays
Zm00001d033859	HB,Homeobox transcription factor family	Zm00001d052661	424	443	+	4.1e-06	CACCCTCTCTCTCTTCCGGC	Zea mays
Zm00001d033859	HB,Homeobox transcription factor family	Zm00001d052738	309	328	+	8.58e-06	CGCCTCCCTCCTCCTCCTCC	Zea mays
Zm00001d033859	HB,Homeobox transcription factor family	Zm00001d052843	294	313	-	4.89e-06	CTCCCTCCCTCCCTCGCGTC	Zea mays
Zm00001d033859	HB,Homeobox transcription factor family	Zm00001d052906	105	124	+	5.86e-06	CCGGTCCCGTCCGTCTCTGC	Zea mays
Zm00001d033859	HB,Homeobox transcription factor family	Zm00001d052990	43	62	+	2.67e-06	CACTCTCTCTCTCTCTCTCG	Zea mays
Zm00001d033859	HB,Homeobox transcription factor family	Zm00001d053015	276	295	-	2.67e-06	CCCTCCCTTTCTCTTTCTCT	Zea mays
Zm00001d033859	HB,Homeobox transcription factor family	Zm00001d053068	362	381	+	4.9e-07	CTCTCGGTCTCTCTCTCTCT	Zea mays
Zm00001d033859	HB,Homeobox transcription factor family	Zm00001d053149	457	476	+	1.32e-06	CTTTCTCTTCCTCTTCCTCT	Zea mays
Zm00001d033859	HB,Homeobox transcription factor family	Zm00001d053195	233	252	+	2.86e-07	TGCTCTGCTCCTGCTCCTGC	Zea mays
Zm00001d033859	HB,Homeobox transcription factor family	Zm00001d053268	208	227	-	1.21e-06	CTCTCTCTCTCTCTCTCTAT	Zea mays
Zm00001d033859	HB,Homeobox transcription factor family	Zm00001d053702	293	312	+	1.09e-06	CCCCCTCTGCCTCTCTCTGG	Zea mays
Zm00001d033859	HB,Homeobox transcription factor family	Zm00001d053781	374	393	+	2.86e-06	CCCTCTCCCCCCCGTCCGTC	Zea mays
Zm00001d033859	HB,Homeobox transcription factor family	Zm00001d053828	86	105	-	3.39e-06	TCGTCGGTGTCCGTCGCTGC	Zea mays
Zm00001d033859	HB,Homeobox transcription factor family	Zm00001d053880	45	64	+	7.99e-06	TCCTCCTCCTCTCTCCCTCT	Zea mays
Zm00001d033859	HB,Homeobox transcription factor family	Zm00001d053897	478	497	-	1.83e-07	CTCTCTCTCTCTGCCTGTCT	Zea mays
Zm00001d033859	HB,Homeobox transcription factor family	Zm00001d054044	426	445	+	4.34e-06	CACCCCCCCCCCCCCCCCCC	Zea mays
Zm00001d033859	HB,Homeobox transcription factor family	Zm00001d054087	12	31	+	7.91e-06	CCCTTCCCCTCCCCCTCTGG	Zea mays
Zm00001d033859	HB,Homeobox transcription factor family	Zm00001d054106	265	284	-	2.49e-06	CCTCCCCTTCTCCCCTCTCC	Zea mays
Zm00001d045212	bHLH,Basic Helix-Loop-Helix family	Zm00001d001860	77	85	+	5.66e-06	CCCACGTGG	Zea mays
Zm00001d045212	bHLH,Basic Helix-Loop-Helix family	Zm00001d002256	475	483	-	2.83e-06	CCCACGTGC	Zea mays
Zm00001d045212	bHLH,Basic Helix-Loop-Helix family	Zm00001d002715	12	20	-	5.66e-06	CCCACGTGG	Zea mays
Zm00001d045212	bHLH,Basic Helix-Loop-Helix family	Zm00001d003839	144	152	-	2.83e-06	CCCACGTGC	Zea mays
Zm00001d045212	bHLH,Basic Helix-Loop-Helix family	Zm00001d004138	422	430	+	8.83e-06	CCCACGTGT	Zea mays
Zm00001d045212	bHLH,Basic Helix-Loop-Helix family	Zm00001d004478	476	484	+	8.83e-06	CCCACGTGT	Zea mays
Zm00001d045212	bHLH,Basic Helix-Loop-Helix family	Zm00001d004524	370	378	+	8.83e-06	CCCACGTGT	Zea mays
Zm00001d045212	bHLH,Basic Helix-Loop-Helix family	Zm00001d005726	163	171	-	5.66e-06	CCCACGTGG	Zea mays
Zm00001d045212	bHLH,Basic Helix-Loop-Helix family	Zm00001d009503	404	412	-	8.83e-06	CCCACGTGT	Zea mays
Zm00001d045212	bHLH,Basic Helix-Loop-Helix family	Zm00001d010171	330	338	+	2.83e-06	CCCACGTGC	Zea mays
Zm00001d045212	bHLH,Basic Helix-Loop-Helix family	Zm00001d010755	438	446	-	8.83e-06	CCCACGTGT	Zea mays
Zm00001d045212	bHLH,Basic Helix-Loop-Helix family	Zm00001d010796	110	118	-	5.66e-06	CCCACGTGG	Zea mays
Zm00001d045212	bHLH,Basic Helix-Loop-Helix family	Zm00001d011585	414	422	-	2.83e-06	CCCACGTGC	Zea mays
Zm00001d045212	bHLH,Basic Helix-Loop-Helix family	Zm00001d011993	30	38	+	2.83e-06	CCCACGTGC	Zea mays
Zm00001d045212	bHLH,Basic Helix-Loop-Helix family	Zm00001d012810	353	361	+	5.66e-06	CCCACGTGG	Zea mays
Zm00001d045212	bHLH,Basic Helix-Loop-Helix family	Zm00001d012972	250	258	-	2.83e-06	CCCACGTGC	Zea mays
Zm00001d045212	bHLH,Basic Helix-Loop-Helix family	Zm00001d013097	309	317	+	5.66e-06	CCCACGTGG	Zea mays
Zm00001d045212	bHLH,Basic Helix-Loop-Helix family	Zm00001d013736	346	354	+	5.66e-06	CCCACGTGG	Zea mays
Zm00001d045212	bHLH,Basic Helix-Loop-Helix family	Zm00001d013927	463	471	+	2.83e-06	CCCACGTGC	Zea mays
Zm00001d045212	bHLH,Basic Helix-Loop-Helix family	Zm00001d013934	313	321	-	2.83e-06	CCCACGTGC	Zea mays
Zm00001d045212	bHLH,Basic Helix-Loop-Helix family	Zm00001d015385	335	343	-	5.66e-06	CCCACGTGG	Zea mays
Zm00001d045212	bHLH,Basic Helix-Loop-Helix family	Zm00001d017984	176	184	-	2.83e-06	CCCACGTGC	Zea mays
Zm00001d045212	bHLH,Basic Helix-Loop-Helix family	Zm00001d018477	275	283	-	8.83e-06	CCCACGTGT	Zea mays
Zm00001d045212	bHLH,Basic Helix-Loop-Helix family	Zm00001d020280	404	412	+	8.83e-06	CCCACGTGT	Zea mays
Zm00001d045212	bHLH,Basic Helix-Loop-Helix family	Zm00001d020409	279	287	-	5.66e-06	CCCACGTGG	Zea mays
Zm00001d045212	bHLH,Basic Helix-Loop-Helix family	Zm00001d021401	455	463	+	2.83e-06	CCCACGTGC	Zea mays
Zm00001d045212	bHLH,Basic Helix-Loop-Helix family	Zm00001d021629	272	280	+	2.83e-06	CCCACGTGC	Zea mays
Zm00001d045212	bHLH,Basic Helix-Loop-Helix family	Zm00001d023385	389	397	-	2.83e-06	CCCACGTGC	Zea mays
Zm00001d045212	bHLH,Basic Helix-Loop-Helix family	Zm00001d024768	358	366	-	8.83e-06	CCCACGTGT	Zea mays
Zm00001d045212	bHLH,Basic Helix-Loop-Helix family	Zm00001d024996	130	138	-	2.83e-06	CCCACGTGC	Zea mays
Zm00001d045212	bHLH,Basic Helix-Loop-Helix family	Zm00001d025278	444	452	-	5.66e-06	CCCACGTGG	Zea mays
Zm00001d045212	bHLH,Basic Helix-Loop-Helix family	Zm00001d027760	124	132	+	5.66e-06	CCCACGTGG	Zea mays
Zm00001d045212	bHLH,Basic Helix-Loop-Helix family	Zm00001d028071	401	409	+	5.66e-06	CCCACGTGG	Zea mays
Zm00001d045212	bHLH,Basic Helix-Loop-Helix family	Zm00001d029560	446	454	-	8.83e-06	CCCACGTGT	Zea mays
Zm00001d045212	bHLH,Basic Helix-Loop-Helix family	Zm00001d032383	400	408	+	8.83e-06	CCCACGTGT	Zea mays
Zm00001d045212	bHLH,Basic Helix-Loop-Helix family	Zm00001d032458	296	304	+	2.83e-06	CCCACGTGC	Zea mays
Zm00001d045212	bHLH,Basic Helix-Loop-Helix family	Zm00001d032736	378	386	+	5.66e-06	CCCACGTGG	Zea mays
Zm00001d045212	bHLH,Basic Helix-Loop-Helix family	Zm00001d033389	311	319	+	8.83e-06	CCCACGTGT	Zea mays
Zm00001d045212	bHLH,Basic Helix-Loop-Helix family	Zm00001d033510	66	74	+	5.66e-06	CCCACGTGG	Zea mays
Zm00001d045212	bHLH,Basic Helix-Loop-Helix family	Zm00001d033932	492	500	+	2.83e-06	CCCACGTGC	Zea mays
Zm00001d045212	bHLH,Basic Helix-Loop-Helix family	Zm00001d035456	289	297	+	2.83e-06	CCCACGTGC	Zea mays
Zm00001d045212	bHLH,Basic Helix-Loop-Helix family	Zm00001d038387	426	434	+	5.66e-06	CCCACGTGG	Zea mays
Zm00001d045212	bHLH,Basic Helix-Loop-Helix family	Zm00001d038389	389	397	-	2.83e-06	CCCACGTGC	Zea mays
Zm00001d045212	bHLH,Basic Helix-Loop-Helix family	Zm00001d038551	102	110	-	8.83e-06	CCCACGTGT	Zea mays
Zm00001d045212	bHLH,Basic Helix-Loop-Helix family	Zm00001d038728	119	127	-	8.83e-06	CCCACGTGT	Zea mays
Zm00001d045212	bHLH,Basic Helix-Loop-Helix family	Zm00001d038841	406	414	+	5.66e-06	CCCACGTGG	Zea mays
Zm00001d045212	bHLH,Basic Helix-Loop-Helix family	Zm00001d039011	141	149	+	2.83e-06	CCCACGTGC	Zea mays
Zm00001d045212	bHLH,Basic Helix-Loop-Helix family	Zm00001d039400	379	387	+	8.83e-06	CCCACGTGT	Zea mays
Zm00001d045212	bHLH,Basic Helix-Loop-Helix family	Zm00001d039667	134	142	+	5.66e-06	CCCACGTGG	Zea mays
Zm00001d045212	bHLH,Basic Helix-Loop-Helix family	Zm00001d039715	348	356	-	5.66e-06	CCCACGTGG	Zea mays
Zm00001d045212	bHLH,Basic Helix-Loop-Helix family	Zm00001d042274	173	181	-	8.83e-06	CCCACGTGT	Zea mays
Zm00001d045212	bHLH,Basic Helix-Loop-Helix family	Zm00001d042948	43	51	-	2.83e-06	CCCACGTGC	Zea mays
Zm00001d045212	bHLH,Basic Helix-Loop-Helix family	Zm00001d043165	324	332	+	2.83e-06	CCCACGTGC	Zea mays
Zm00001d045212	bHLH,Basic Helix-Loop-Helix family	Zm00001d043798	21	29	+	8.83e-06	CCCACGTGT	Zea mays
Zm00001d045212	bHLH,Basic Helix-Loop-Helix family	Zm00001d044769	55	63	-	8.83e-06	CCCACGTGT	Zea mays
Zm00001d045212	bHLH,Basic Helix-Loop-Helix family	Zm00001d045369	262	270	+	8.83e-06	CCCACGTGT	Zea mays
Zm00001d045212	bHLH,Basic Helix-Loop-Helix family	Zm00001d046540	116	124	-	5.66e-06	CCCACGTGG	Zea mays
Zm00001d045212	bHLH,Basic Helix-Loop-Helix family	Zm00001d046961	165	173	+	2.83e-06	CCCACGTGC	Zea mays
Zm00001d045212	bHLH,Basic Helix-Loop-Helix family	Zm00001d047671	276	284	+	2.83e-06	CCCACGTGC	Zea mays
Zm00001d045212	bHLH,Basic Helix-Loop-Helix family	Zm00001d047761	372	380	-	5.66e-06	CCCACGTGG	Zea mays
Zm00001d045212	bHLH,Basic Helix-Loop-Helix family	Zm00001d048263	289	297	+	8.83e-06	CCCACGTGT	Zea mays
Zm00001d045212	bHLH,Basic Helix-Loop-Helix family	Zm00001d048552	180	188	+	5.66e-06	CCCACGTGG	Zea mays
Zm00001d045212	bHLH,Basic Helix-Loop-Helix family	Zm00001d049960	104	112	-	5.66e-06	CCCACGTGG	Zea mays
Zm00001d045212	bHLH,Basic Helix-Loop-Helix family	Zm00001d050716	475	483	+	2.83e-06	CCCACGTGC	Zea mays
Zm00001d045212	bHLH,Basic Helix-Loop-Helix family	Zm00001d050737	235	243	-	5.66e-06	CCCACGTGG	Zea mays
Zm00001d045212	bHLH,Basic Helix-Loop-Helix family	Zm00001d052661	50	58	-	8.83e-06	CCCACGTGT	Zea mays
Zm00001d018656	WRKY57	Zm00001d002993	80	89	+	1.05e-06	AAAGTCAACG	Zea mays
Zm00001d018656	WRKY57	Zm00001d003197	275	284	+	8.2e-06	AAAGTCAACT	Zea mays
Zm00001d018656	WRKY57	Zm00001d006293	315	324	-	8.2e-06	AAAGTCAACT	Zea mays
Zm00001d018656	WRKY57	Zm00001d006825	272	281	+	3.98e-06	GAAGTCAACG	Zea mays
Zm00001d018656	WRKY57	Zm00001d010945	304	313	+	5.03e-06	TAAGTCAACG	Zea mays
Zm00001d018656	WRKY57	Zm00001d012170	165	174	-	7.02e-06	CAAGTCAACG	Zea mays
Zm00001d018656	WRKY57	Zm00001d012561	77	86	+	1.05e-06	AAAGTCAACG	Zea mays
Zm00001d018656	WRKY57	Zm00001d012782	348	357	+	3.04e-06	ATAGTCAACG	Zea mays
Zm00001d018656	WRKY57	Zm00001d014360	331	340	+	8.2e-06	AAAGTCAACT	Zea mays
Zm00001d018656	WRKY57	Zm00001d017166	58	67	-	8.2e-06	AAAGTCAACT	Zea mays
Zm00001d018656	WRKY57	Zm00001d018500	61	70	+	6.08e-06	AAAGTCAACC	Zea mays
Zm00001d018656	WRKY57	Zm00001d018627	401	410	-	7.02e-06	CAAGTCAACG	Zea mays
Zm00001d018656	WRKY57	Zm00001d019422	117	126	-	8.2e-06	AAAGTCAACT	Zea mays
Zm00001d018656	WRKY57	Zm00001d020703	18	27	-	3.98e-06	GAAGTCAACG	Zea mays
Zm00001d018656	WRKY57	Zm00001d021442	329	338	-	8.2e-06	AAAGTCAACT	Zea mays
Zm00001d018656	WRKY57	Zm00001d023625	365	374	+	1.05e-06	AAAGTCAACG	Zea mays
Zm00001d018656	WRKY57	Zm00001d024148	140	149	+	8.2e-06	AAAGTCAACT	Zea mays
Zm00001d018656	WRKY57	Zm00001d028477	210	219	-	6.08e-06	AAAGTCAACC	Zea mays
Zm00001d018656	WRKY57	Zm00001d030555	418	427	+	7.02e-06	CAAGTCAACG	Zea mays
Zm00001d018656	WRKY57	Zm00001d031430	190	199	+	9.14e-06	ACAGTCAACG	Zea mays
Zm00001d018656	WRKY57	Zm00001d034514	270	279	+	6.08e-06	AAAGTCAACC	Zea mays
Zm00001d018656	WRKY57	Zm00001d037826	257	266	+	9.14e-06	ACAGTCAACG	Zea mays
Zm00001d018656	WRKY57	Zm00001d038648	233	242	+	1.05e-06	AAAGTCAACG	Zea mays
Zm00001d018656	WRKY57	Zm00001d040777	413	422	-	3.98e-06	GAAGTCAACG	Zea mays
Zm00001d018656	WRKY57	Zm00001d041025	306	315	+	5.03e-06	TAAGTCAACG	Zea mays
Zm00001d018656	WRKY57	Zm00001d043462	292	301	+	6.08e-06	AAAGTCAACC	Zea mays
Zm00001d018656	WRKY57	Zm00001d045210	162	171	+	7.02e-06	CAAGTCAACG	Zea mays
Zm00001d018656	WRKY57	Zm00001d045211	314	323	-	3.98e-06	GAAGTCAACG	Zea mays
Zm00001d018656	WRKY57	Zm00001d046277	56	65	+	9.14e-06	ACAGTCAACG	Zea mays
Zm00001d018656	WRKY57	Zm00001d049303	11	20	+	8.2e-06	AAAGTCAACT	Zea mays
Zm00001d018656	WRKY57	Zm00001d051761	425	434	+	1.05e-06	AAAGTCAACG	Zea mays
Zm00001d018656	WRKY57	Zm00001d053522	394	403	+	7.02e-06	CAAGTCAACG	Zea mays
Zm00001d051749	HB,Homeobox transcription factor family	Zm00001d000829	260	270	+	9.11e-06	TTAATAATTGT	Zea mays
Zm00001d051749	HB,Homeobox transcription factor family	Zm00001d002052	146	156	-	2.49e-06	ACAATAATTAA	Zea mays
Zm00001d051749	HB,Homeobox transcription factor family	Zm00001d004055	41	51	+	9.11e-06	TTAATAATTGT	Zea mays
Zm00001d051749	HB,Homeobox transcription factor family	Zm00001d004309	111	121	-	7.98e-06	TCAATAATTCA	Zea mays
Zm00001d051749	HB,Homeobox transcription factor family	Zm00001d005056	445	455	+	6.5e-06	CAAATAATTGA	Zea mays
Zm00001d051749	HB,Homeobox transcription factor family	Zm00001d005092	130	140	-	9.99e-06	ATAATAATTAA	Zea mays
Zm00001d051749	HB,Homeobox transcription factor family	Zm00001d005306	251	261	-	2.49e-06	ACAATAATTAA	Zea mays
Zm00001d051749	HB,Homeobox transcription factor family	Zm00001d005627	273	283	-	6.97e-07	ACAATAATTGA	Zea mays
Zm00001d051749	HB,Homeobox transcription factor family	Zm00001d005969	112	122	-	4.24e-06	CCAATAATTAA	Zea mays
Zm00001d051749	HB,Homeobox transcription factor family	Zm00001d006493	329	339	-	6.15e-06	TCAATAATTTA	Zea mays
Zm00001d051749	HB,Homeobox transcription factor family	Zm00001d007345	456	466	+	9.11e-06	ATAATAATTGT	Zea mays
Zm00001d051749	HB,Homeobox transcription factor family	Zm00001d007716	213	223	+	5.02e-06	AAAATAATTGA	Zea mays
Zm00001d051749	HB,Homeobox transcription factor family	Zm00001d008440	293	303	-	7.98e-06	ACAATAATTCA	Zea mays
Zm00001d051749	HB,Homeobox transcription factor family	Zm00001d009084	68	78	+	9.99e-06	TTAATAATTAA	Zea mays
Zm00001d051749	HB,Homeobox transcription factor family	Zm00001d009404	410	420	+	6.97e-07	TCAATAATTGA	Zea mays
Zm00001d051749	HB,Homeobox transcription factor family	Zm00001d009473	19	29	+	7.28e-06	ACAATAATTAT	Zea mays
Zm00001d051749	HB,Homeobox transcription factor family	Zm00001d009503	244	254	+	2.49e-06	ACAATAATTAA	Zea mays
Zm00001d051749	HB,Homeobox transcription factor family	Zm00001d009844	82	92	+	1.71e-06	ACAATAATTGT	Zea mays
Zm00001d051749	HB,Homeobox transcription factor family	Zm00001d009929	177	187	-	9.99e-06	ATAATAATTAA	Zea mays
Zm00001d051749	HB,Homeobox transcription factor family	Zm00001d010448	144	154	-	6.15e-06	ACAATAATTTA	Zea mays
Zm00001d051749	HB,Homeobox transcription factor family	Zm00001d010634	139	149	+	9.99e-06	ATAATAATTAA	Zea mays
Zm00001d051749	HB,Homeobox transcription factor family	Zm00001d011602	316	326	-	9.99e-06	TTAATAATTAA	Zea mays
Zm00001d051749	HB,Homeobox transcription factor family	Zm00001d011638	48	58	-	6.15e-06	TCAATAATTTA	Zea mays
Zm00001d051749	HB,Homeobox transcription factor family	Zm00001d011967	92	102	-	3.27e-06	ATAATAATTGA	Zea mays
Zm00001d051749	HB,Homeobox transcription factor family	Zm00001d012036	366	376	-	6.15e-06	TCAATAATTTA	Zea mays
Zm00001d051749	HB,Homeobox transcription factor family	Zm00001d012603	328	338	+	6.97e-07	ACAATAATTGA	Zea mays
Zm00001d051749	HB,Homeobox transcription factor family	Zm00001d012674	290	300	+	5.02e-06	TAAATAATTGA	Zea mays
Zm00001d051749	HB,Homeobox transcription factor family	Zm00001d013655	208	218	-	7.98e-06	ACAATAATTCA	Zea mays
Zm00001d051749	HB,Homeobox transcription factor family	Zm00001d013955	223	233	-	6.97e-07	ACAATAATTGA	Zea mays
Zm00001d051749	HB,Homeobox transcription factor family	Zm00001d014351	116	126	-	2.49e-06	ACAATAATTAA	Zea mays
Zm00001d051749	HB,Homeobox transcription factor family	Zm00001d014611	401	411	+	4.24e-06	CCAATAATTAA	Zea mays
Zm00001d051749	HB,Homeobox transcription factor family	Zm00001d014967	38	48	-	7.28e-06	TCAATAATTAT	Zea mays
Zm00001d051749	HB,Homeobox transcription factor family	Zm00001d015968	252	262	-	6.15e-06	TCAATAATTTA	Zea mays
Zm00001d051749	HB,Homeobox transcription factor family	Zm00001d016166	7	17	+	7.28e-06	ACAATAATTAT	Zea mays
Zm00001d051749	HB,Homeobox transcription factor family	Zm00001d017121	98	108	-	6.15e-06	TCAATAATTTA	Zea mays
Zm00001d051749	HB,Homeobox transcription factor family	Zm00001d017240	25	35	-	8.33e-06	CCAATAATTTA	Zea mays
Zm00001d051749	HB,Homeobox transcription factor family	Zm00001d017767	316	326	-	9.11e-06	TTAATAATTGT	Zea mays
Zm00001d051749	HB,Homeobox transcription factor family	Zm00001d017966	318	328	-	6.97e-07	ACAATAATTGA	Zea mays
Zm00001d051749	HB,Homeobox transcription factor family	Zm00001d018059	245	255	-	6.5e-06	CAAATAATTGA	Zea mays
Zm00001d051749	HB,Homeobox transcription factor family	Zm00001d018598	43	53	+	5.02e-06	AAAATAATTGA	Zea mays
Zm00001d051749	HB,Homeobox transcription factor family	Zm00001d018801	99	109	-	9.11e-06	ATAATAATTGT	Zea mays
Zm00001d051749	HB,Homeobox transcription factor family	Zm00001d019100	116	126	-	9.99e-06	TTAATAATTAA	Zea mays
Zm00001d051749	HB,Homeobox transcription factor family	Zm00001d019358	222	232	-	9.99e-06	ATAATAATTAA	Zea mays
Zm00001d051749	HB,Homeobox transcription factor family	Zm00001d020004	61	71	+	9.99e-06	TTAATAATTAA	Zea mays
Zm00001d051749	HB,Homeobox transcription factor family	Zm00001d020957	428	438	-	5.02e-06	AAAATAATTGA	Zea mays
Zm00001d051749	HB,Homeobox transcription factor family	Zm00001d021296	321	331	-	9.99e-06	TTAATAATTAA	Zea mays
Zm00001d051749	HB,Homeobox transcription factor family	Zm00001d021582	160	170	-	1.71e-06	ACAATAATTGT	Zea mays
Zm00001d051749	HB,Homeobox transcription factor family	Zm00001d021897	218	228	-	7.28e-06	ACAATAATTAT	Zea mays
Zm00001d051749	HB,Homeobox transcription factor family	Zm00001d022425	11	21	-	9.11e-06	ATAATAATTGT	Zea mays
Zm00001d051749	HB,Homeobox transcription factor family	Zm00001d023340	18	28	-	5.02e-06	TAAATAATTGA	Zea mays
Zm00001d051749	HB,Homeobox transcription factor family	Zm00001d024248	37	47	-	5.02e-06	AAAATAATTGA	Zea mays
Zm00001d051749	HB,Homeobox transcription factor family	Zm00001d025533	24	34	-	5.02e-06	AAAATAATTGA	Zea mays
Zm00001d051749	HB,Homeobox transcription factor family	Zm00001d026252	125	135	-	1.01e-06	CCAATAATTGA	Zea mays
Zm00001d051749	HB,Homeobox transcription factor family	Zm00001d027392	377	387	-	1.71e-06	TCAATAATTGT	Zea mays
Zm00001d051749	HB,Homeobox transcription factor family	Zm00001d028006	93	103	+	6.15e-06	TCAATAATTTA	Zea mays
Zm00001d051749	HB,Homeobox transcription factor family	Zm00001d028363	356	366	+	3.89e-06	CCAATAATTGT	Zea mays
Zm00001d051749	HB,Homeobox transcription factor family	Zm00001d028412	202	212	-	7.28e-06	ACAATAATTAT	Zea mays
Zm00001d051749	HB,Homeobox transcription factor family	Zm00001d028443	87	97	-	9.99e-06	ATAATAATTAA	Zea mays
Zm00001d051749	HB,Homeobox transcription factor family	Zm00001d029713	159	169	-	6.15e-06	ACAATAATTTA	Zea mays
Zm00001d051749	HB,Homeobox transcription factor family	Zm00001d030581	85	95	+	9.99e-06	ATAATAATTAA	Zea mays
Zm00001d051749	HB,Homeobox transcription factor family	Zm00001d030942	85	95	-	6.5e-06	CAAATAATTGA	Zea mays
Zm00001d051749	HB,Homeobox transcription factor family	Zm00001d031258	314	324	-	7.98e-06	TCAATAATTCA	Zea mays
Zm00001d051749	HB,Homeobox transcription factor family	Zm00001d031496	286	296	-	7.28e-06	ACAATAATTAT	Zea mays
Zm00001d051749	HB,Homeobox transcription factor family	Zm00001d031937	396	406	-	5.02e-06	AAAATAATTGA	Zea mays
Zm00001d051749	HB,Homeobox transcription factor family	Zm00001d032215	326	336	-	8.33e-06	CCAATAATTTA	Zea mays
Zm00001d051749	HB,Homeobox transcription factor family	Zm00001d032310	327	337	+	1.01e-06	CCAATAATTGA	Zea mays
Zm00001d051749	HB,Homeobox transcription factor family	Zm00001d032703	434	444	-	9.99e-06	TTAATAATTAA	Zea mays
Zm00001d051749	HB,Homeobox transcription factor family	Zm00001d033605	137	147	+	2.49e-06	TCAATAATTAA	Zea mays
Zm00001d051749	HB,Homeobox transcription factor family	Zm00001d034803	364	374	-	9.99e-06	ATAATAATTAA	Zea mays
Zm00001d051749	HB,Homeobox transcription factor family	Zm00001d036137	50	60	-	9.99e-06	TTAATAATTAA	Zea mays
Zm00001d051749	HB,Homeobox transcription factor family	Zm00001d037748	238	248	+	6.15e-06	ACAATAATTTA	Zea mays
Zm00001d051749	HB,Homeobox transcription factor family	Zm00001d038217	323	333	-	9.99e-06	TTAATAATTAA	Zea mays
Zm00001d051749	HB,Homeobox transcription factor family	Zm00001d038768	38	48	+	5.02e-06	AAAATAATTGA	Zea mays
Zm00001d051749	HB,Homeobox transcription factor family	Zm00001d038791	395	405	+	4.24e-06	CCAATAATTAA	Zea mays
Zm00001d051749	HB,Homeobox transcription factor family	Zm00001d038882	207	217	+	9.99e-06	ATAATAATTAA	Zea mays
Zm00001d051749	HB,Homeobox transcription factor family	Zm00001d039181	346	356	-	9.99e-06	ATAATAATTAA	Zea mays
Zm00001d051749	HB,Homeobox transcription factor family	Zm00001d039678	64	74	-	6.15e-06	TCAATAATTTA	Zea mays
Zm00001d051749	HB,Homeobox transcription factor family	Zm00001d041574	176	186	+	6.97e-07	ACAATAATTGA	Zea mays
Zm00001d051749	HB,Homeobox transcription factor family	Zm00001d042289	33	43	+	9.99e-06	ATAATAATTAA	Zea mays
Zm00001d051749	HB,Homeobox transcription factor family	Zm00001d042846	42	52	-	9.99e-06	TTAATAATTAA	Zea mays
Zm00001d051749	HB,Homeobox transcription factor family	Zm00001d043211	195	205	+	8.33e-06	CCAATAATTTA	Zea mays
Zm00001d051749	HB,Homeobox transcription factor family	Zm00001d043348	60	70	-	5.37e-06	CTAATAATTGA	Zea mays
Zm00001d051749	HB,Homeobox transcription factor family	Zm00001d043538	392	402	-	7.98e-06	TCAATAATTCA	Zea mays
Zm00001d051749	HB,Homeobox transcription factor family	Zm00001d043547	57	67	-	6.15e-06	ACAATAATTTA	Zea mays
Zm00001d051749	HB,Homeobox transcription factor family	Zm00001d043569	247	257	+	9.99e-06	TTAATAATTAA	Zea mays
Zm00001d051749	HB,Homeobox transcription factor family	Zm00001d043665	379	389	+	6.15e-06	TCAATAATTTA	Zea mays
Zm00001d051749	HB,Homeobox transcription factor family	Zm00001d043762	414	424	-	2.49e-06	TCAATAATTAA	Zea mays
Zm00001d051749	HB,Homeobox transcription factor family	Zm00001d043845	182	192	-	9.99e-06	TTAATAATTAA	Zea mays
Zm00001d051749	HB,Homeobox transcription factor family	Zm00001d044146	85	95	+	3.27e-06	ATAATAATTGA	Zea mays
Zm00001d051749	HB,Homeobox transcription factor family	Zm00001d044340	205	215	+	7.28e-06	TCAATAATTAT	Zea mays
Zm00001d051749	HB,Homeobox transcription factor family	Zm00001d044646	288	298	-	3.27e-06	TTAATAATTGA	Zea mays
Zm00001d051749	HB,Homeobox transcription factor family	Zm00001d044685	40	50	-	2.49e-06	ACAATAATTAA	Zea mays
Zm00001d051749	HB,Homeobox transcription factor family	Zm00001d044812	45	55	-	2.49e-06	ACAATAATTAA	Zea mays
Zm00001d051749	HB,Homeobox transcription factor family	Zm00001d045788	333	343	-	6.97e-07	ACAATAATTGA	Zea mays
Zm00001d051749	HB,Homeobox transcription factor family	Zm00001d045839	323	333	-	6.97e-07	TCAATAATTGA	Zea mays
Zm00001d051749	HB,Homeobox transcription factor family	Zm00001d045862	392	402	-	6.97e-07	ACAATAATTGA	Zea mays
Zm00001d051749	HB,Homeobox transcription factor family	Zm00001d046801	59	69	-	7.28e-06	ACAATAATTAT	Zea mays
Zm00001d051749	HB,Homeobox transcription factor family	Zm00001d047759	308	318	-	9.99e-06	ATAATAATTAA	Zea mays
Zm00001d051749	HB,Homeobox transcription factor family	Zm00001d048533	119	129	-	3.58e-06	GCAATAATTGA	Zea mays
Zm00001d051749	HB,Homeobox transcription factor family	Zm00001d048559	285	295	+	3.27e-06	ATAATAATTGA	Zea mays
Zm00001d051749	HB,Homeobox transcription factor family	Zm00001d048634	141	151	-	7.28e-06	ACAATAATTAT	Zea mays
Zm00001d051749	HB,Homeobox transcription factor family	Zm00001d048709	279	289	-	7.28e-06	ACAATAATTAT	Zea mays
Zm00001d051749	HB,Homeobox transcription factor family	Zm00001d048710	270	280	-	4.24e-06	CCAATAATTAA	Zea mays
Zm00001d051749	HB,Homeobox transcription factor family	Zm00001d049173	124	134	-	3.58e-06	GCAATAATTGA	Zea mays
Zm00001d051749	HB,Homeobox transcription factor family	Zm00001d049217	148	158	-	7.98e-06	ACAATAATTCA	Zea mays
Zm00001d051749	HB,Homeobox transcription factor family	Zm00001d049232	340	350	+	7.28e-06	ACAATAATTAT	Zea mays
Zm00001d051749	HB,Homeobox transcription factor family	Zm00001d049260	386	396	-	1.71e-06	ACAATAATTGT	Zea mays
Zm00001d051749	HB,Homeobox transcription factor family	Zm00001d049643	151	161	-	3.58e-06	GCAATAATTGA	Zea mays
Zm00001d051749	HB,Homeobox transcription factor family	Zm00001d049727	72	82	+	9.11e-06	TTAATAATTGT	Zea mays
Zm00001d051749	HB,Homeobox transcription factor family	Zm00001d049902	284	294	-	5.02e-06	AAAATAATTGA	Zea mays
Zm00001d051749	HB,Homeobox transcription factor family	Zm00001d049940	52	62	-	6.97e-07	ACAATAATTGA	Zea mays
Zm00001d051749	HB,Homeobox transcription factor family	Zm00001d049960	243	253	+	9.99e-06	TTAATAATTAA	Zea mays
Zm00001d051749	HB,Homeobox transcription factor family	Zm00001d049995	150	160	-	7.28e-06	ACAATAATTAT	Zea mays
Zm00001d051749	HB,Homeobox transcription factor family	Zm00001d050341	289	299	-	9.99e-06	TTAATAATTAA	Zea mays
Zm00001d051749	HB,Homeobox transcription factor family	Zm00001d051542	106	116	+	2.49e-06	ACAATAATTAA	Zea mays
Zm00001d051749	HB,Homeobox transcription factor family	Zm00001d052322	245	255	-	9.11e-06	ATAATAATTGT	Zea mays
Zm00001d051749	HB,Homeobox transcription factor family	Zm00001d053727	125	135	+	1.71e-06	TCAATAATTGT	Zea mays
Zm00001d051749	HB,Homeobox transcription factor family	Zm00001d053733	178	188	-	4.24e-06	CCAATAATTAA	Zea mays
Zm00001d051749	HB,Homeobox transcription factor family	Zm00001d053801	298	308	-	6.15e-06	ACAATAATTTA	Zea mays
Zm00001d051749	HB,Homeobox transcription factor family	Zm00001d053816	332	342	+	9.99e-06	ATAATAATTAA	Zea mays
Zm00001d051749	HB,Homeobox transcription factor family	Zm00001d053974	415	425	+	9.99e-06	ATAATAATTAA	Zea mays
Zm00001d046718	bZIP transcription factor family	Zm00001d005423	345	354	+	9.19e-06	GTGACATCAC	Zea mays
Zm00001d046718	bZIP transcription factor family	Zm00001d008976	321	330	-	7.32e-06	TTGACGTCAC	Zea mays
Zm00001d046718	bZIP transcription factor family	Zm00001d013817	459	468	+	1.78e-06	ATGACGTCAC	Zea mays
Zm00001d046718	bZIP transcription factor family	Zm00001d014116	112	121	+	1.78e-06	ATGACGTCAC	Zea mays
Zm00001d046718	bZIP transcription factor family	Zm00001d014726	457	466	+	1.78e-06	ATGACGTCAC	Zea mays
Zm00001d046718	bZIP transcription factor family	Zm00001d014773	156	165	+	4.6e-06	CTGACGTCAC	Zea mays
Zm00001d046718	bZIP transcription factor family	Zm00001d017969	194	203	+	4.6e-06	CTGACGTCAC	Zea mays
Zm00001d046718	bZIP transcription factor family	Zm00001d021120	337	346	+	9.19e-06	GTGATGTCAC	Zea mays
Zm00001d046718	bZIP transcription factor family	Zm00001d022092	386	395	+	7.32e-06	TTGACGTCAC	Zea mays
Zm00001d046718	bZIP transcription factor family	Zm00001d022590	344	353	-	6.38e-06	CTGACGTCAT	Zea mays
Zm00001d046718	bZIP transcription factor family	Zm00001d024934	405	414	+	8.38e-07	GTGACGTCAC	Zea mays
Zm00001d046718	bZIP transcription factor family	Zm00001d025533	399	408	-	7.32e-06	TTGACGTCAC	Zea mays
Zm00001d046718	bZIP transcription factor family	Zm00001d029383	180	189	-	7.32e-06	TTGACGTCAC	Zea mays
Zm00001d046718	bZIP transcription factor family	Zm00001d029744	261	270	+	8.38e-07	GTGACGTCAC	Zea mays
Zm00001d046718	bZIP transcription factor family	Zm00001d032552	218	227	+	1.78e-06	ATGACGTCAC	Zea mays
Zm00001d046718	bZIP transcription factor family	Zm00001d034356	183	192	+	8.38e-07	GTGACGTCAC	Zea mays
Zm00001d046718	bZIP transcription factor family	Zm00001d036416	212	221	+	4.6e-06	CTGACGTCAC	Zea mays
Zm00001d046718	bZIP transcription factor family	Zm00001d037757	303	312	+	4.6e-06	CTGACGTCAC	Zea mays
Zm00001d046718	bZIP transcription factor family	Zm00001d039468	316	325	+	4.6e-06	CTGACGTCAC	Zea mays
Zm00001d046718	bZIP transcription factor family	Zm00001d039963	340	349	+	3.77e-06	ATGACGTCAT	Zea mays
Zm00001d046718	bZIP transcription factor family	Zm00001d042088	123	132	+	9.19e-06	GTGACATCAC	Zea mays
Zm00001d046718	bZIP transcription factor family	Zm00001d042507	176	185	+	7.32e-06	TTGACGTCAC	Zea mays
Zm00001d046718	bZIP transcription factor family	Zm00001d046945	459	468	+	4.6e-06	CTGACGTCAC	Zea mays
Zm00001d046718	bZIP transcription factor family	Zm00001d047638	231	240	+	8.38e-07	GTGACGTCAC	Zea mays
Zm00001d046718	bZIP transcription factor family	Zm00001d048461	113	122	+	9.19e-06	GTGACATCAC	Zea mays
Zm00001d046718	bZIP transcription factor family	Zm00001d049565	286	295	-	6.38e-06	CTGACGTCAT	Zea mays
Zm00001d046718	bZIP transcription factor family	Zm00001d050864	47	56	+	5.44e-06	GTGACGTCAG	Zea mays
Zm00001d039006	ARF, Auxin Response Factor family	Zm00001d005936	268	277	-	1.99e-06	TTGTCGGAAC	Zea mays
Zm00001d039006	ARF, Auxin Response Factor family	Zm00001d008394	317	326	-	5.76e-06	TTGTCGGGAA	Zea mays
Zm00001d039006	ARF, Auxin Response Factor family	Zm00001d013750	147	156	-	8.47e-06	TTGTCGGGAC	Zea mays
Zm00001d039006	ARF, Auxin Response Factor family	Zm00001d014038	480	489	-	1.05e-06	TTGTCGGAAA	Zea mays
Zm00001d039006	ARF, Auxin Response Factor family	Zm00001d016586	173	182	+	3.04e-06	TTGTCGGAAT	Zea mays
Zm00001d039006	ARF, Auxin Response Factor family	Zm00001d020674	321	330	+	4.82e-06	GTGTCGGAAC	Zea mays
Zm00001d039006	ARF, Auxin Response Factor family	Zm00001d021841	170	179	-	6.69e-06	TTGTCGGAGA	Zea mays
Zm00001d039006	ARF, Auxin Response Factor family	Zm00001d024379	473	482	-	6.69e-06	TTGTCGGAGA	Zea mays
Zm00001d039006	ARF, Auxin Response Factor family	Zm00001d024768	139	148	+	6.69e-06	TTGTCGGAGA	Zea mays
Zm00001d039006	ARF, Auxin Response Factor family	Zm00001d027572	3	12	-	1.05e-06	TTGTCGGAAA	Zea mays
Zm00001d039006	ARF, Auxin Response Factor family	Zm00001d028272	96	105	-	6.69e-06	TTGTCGGAGA	Zea mays
Zm00001d039006	ARF, Auxin Response Factor family	Zm00001d032058	369	378	-	1.05e-06	TTGTCGGAAA	Zea mays
Zm00001d039006	ARF, Auxin Response Factor family	Zm00001d035610	395	404	-	1.99e-06	TTGTCGGAAC	Zea mays
Zm00001d039006	ARF, Auxin Response Factor family	Zm00001d036946	188	197	-	8.47e-06	TTGTCGGGAC	Zea mays
Zm00001d039006	ARF, Auxin Response Factor family	Zm00001d036965	268	277	+	8.47e-06	TTGTCGGGAC	Zea mays
Zm00001d039006	ARF, Auxin Response Factor family	Zm00001d037695	60	69	-	1.99e-06	TTGTCGGAAC	Zea mays
Zm00001d039006	ARF, Auxin Response Factor family	Zm00001d037748	448	457	+	6.69e-06	TTGTCGGAGA	Zea mays
Zm00001d039006	ARF, Auxin Response Factor family	Zm00001d038804	423	432	-	1.99e-06	TTGTCGGAAC	Zea mays
Zm00001d039006	ARF, Auxin Response Factor family	Zm00001d039355	428	437	-	9.41e-06	GTGTCGGAAT	Zea mays
Zm00001d039006	ARF, Auxin Response Factor family	Zm00001d049769	365	374	-	6.69e-06	TTGTCGGAGA	Zea mays
Zm00001d039006	ARF, Auxin Response Factor family	Zm00001d050130	438	447	-	6.69e-06	TTGTCGGAGA	Zea mays
Zm00001d039006	ARF, Auxin Response Factor family	Zm00001d050737	407	416	+	3.98e-06	GTGTCGGAAA	Zea mays
Zm00001d039006	ARF, Auxin Response Factor family	Zm00001d051251	380	389	+	1.05e-06	TTGTCGGAAA	Zea mays
Zm00001d039006	ARF, Auxin Response Factor family	Zm00001d051628	366	375	-	5.76e-06	TTGTCGGGAA	Zea mays
Zm00001d039006	ARF, Auxin Response Factor family	Zm00001d053453	426	435	-	8.47e-06	TTGTCGGGAC	Zea mays
Zm00001d052543	bZIP transcription factor family	Zm00001d004072	130	140	-	8.66e-06	GGTTACGTCAC	Zea mays
Zm00001d052543	bZIP transcription factor family	Zm00001d007477	63	73	-	6.46e-06	GATGACGTCAA	Zea mays
Zm00001d052543	bZIP transcription factor family	Zm00001d013817	458	468	+	2.97e-06	AATGACGTCAC	Zea mays
Zm00001d052543	bZIP transcription factor family	Zm00001d014116	111	121	+	2.21e-07	GATGACGTCAC	Zea mays
Zm00001d052543	bZIP transcription factor family	Zm00001d014726	456	466	+	2.21e-07	GATGACGTCAC	Zea mays
Zm00001d052543	bZIP transcription factor family	Zm00001d014773	156	166	-	3.44e-06	GGTGACGTCAG	Zea mays
Zm00001d052543	bZIP transcription factor family	Zm00001d017969	193	203	+	5.08e-06	ACTGACGTCAC	Zea mays
Zm00001d052543	bZIP transcription factor family	Zm00001d018535	295	305	-	6.46e-06	GATGACGTCAA	Zea mays
Zm00001d052543	bZIP transcription factor family	Zm00001d022590	343	353	+	1.11e-06	GATGACGTCAG	Zea mays
Zm00001d052543	bZIP transcription factor family	Zm00001d022593	467	477	-	9.13e-06	GCTGACGTGAT	Zea mays
Zm00001d052543	bZIP transcription factor family	Zm00001d024934	405	415	-	9.33e-06	CGTGACGTCAC	Zea mays
Zm00001d052543	bZIP transcription factor family	Zm00001d027630	233	243	-	5.99e-06	GATGACGTCGC	Zea mays
Zm00001d052543	bZIP transcription factor family	Zm00001d028654	144	154	-	8.66e-06	GCTGACGTGAC	Zea mays
Zm00001d052543	bZIP transcription factor family	Zm00001d029150	318	328	+	9.13e-06	GCTGACGTGAT	Zea mays
Zm00001d052543	bZIP transcription factor family	Zm00001d029744	260	270	+	1.31e-06	GGTGACGTCAC	Zea mays
Zm00001d052543	bZIP transcription factor family	Zm00001d032458	207	217	-	1.73e-06	GCTGACGTCAG	Zea mays
Zm00001d052543	bZIP transcription factor family	Zm00001d032552	217	227	+	2.21e-07	GATGACGTCAC	Zea mays
Zm00001d052543	bZIP transcription factor family	Zm00001d034356	182	192	+	9.33e-06	CGTGACGTCAC	Zea mays
Zm00001d052543	bZIP transcription factor family	Zm00001d036416	211	221	+	5.08e-06	ACTGACGTCAC	Zea mays
Zm00001d052543	bZIP transcription factor family	Zm00001d037757	302	312	+	4.11e-06	CCTGACGTCAC	Zea mays
Zm00001d052543	bZIP transcription factor family	Zm00001d039222	322	332	+	8.66e-06	GCTGACGTGAC	Zea mays
Zm00001d052543	bZIP transcription factor family	Zm00001d039468	10	20	-	7.36e-06	GCTGACGTCGC	Zea mays
Zm00001d052543	bZIP transcription factor family	Zm00001d039963	339	349	+	4.69e-07	GATGACGTCAT	Zea mays
Zm00001d052543	bZIP transcription factor family	Zm00001d044666	438	448	+	7.36e-06	GCTGACGTCGC	Zea mays
Zm00001d052543	bZIP transcription factor family	Zm00001d046945	458	468	+	5.08e-06	ACTGACGTCAC	Zea mays
Zm00001d052543	bZIP transcription factor family	Zm00001d047638	230	240	+	9.33e-06	CGTGACGTCAC	Zea mays
Zm00001d052543	bZIP transcription factor family	Zm00001d047769	172	182	+	7.36e-06	GCTGACGTCGC	Zea mays
Zm00001d052543	bZIP transcription factor family	Zm00001d048908	160	170	+	6.93e-06	GATGACGTGAT	Zea mays
Zm00001d052543	bZIP transcription factor family	Zm00001d049565	285	295	+	8e-06	CATGACGTCAG	Zea mays
Zm00001d052543	bZIP transcription factor family	Zm00001d050864	47	57	-	4.11e-06	CCTGACGTCAC	Zea mays
Zm00001d044940	ABF3 (ABSCISIC ACID RESPONSIVE ELEMENTS-BINDING FACTOR 3)	Zm00001d000230	480	497	-	3.2e-06	GGGCGATGACGTGGCGAT	Zea mays
Zm00001d044940	ABF3 (ABSCISIC ACID RESPONSIVE ELEMENTS-BINDING FACTOR 3)	Zm00001d001881	33	50	-	9.82e-06	GGCAGCTGACGTGTCGAG	Zea mays
Zm00001d044940	ABF3 (ABSCISIC ACID RESPONSIVE ELEMENTS-BINDING FACTOR 3)	Zm00001d002020	251	268	+	6.14e-07	TTTTTGAGACGTGGCATA	Zea mays
Zm00001d044940	ABF3 (ABSCISIC ACID RESPONSIVE ELEMENTS-BINDING FACTOR 3)	Zm00001d002178	296	313	+	8.72e-06	TCTTGCTGACGTGGCTGC	Zea mays
Zm00001d044940	ABF3 (ABSCISIC ACID RESPONSIVE ELEMENTS-BINDING FACTOR 3)	Zm00001d002246	329	346	+	3.79e-07	GAGAGCTGACGTGGCAGG	Zea mays
Zm00001d044940	ABF3 (ABSCISIC ACID RESPONSIVE ELEMENTS-BINDING FACTOR 3)	Zm00001d002256	38	55	-	4.28e-06	AATTAGACACGTGTCATC	Zea mays
Zm00001d044940	ABF3 (ABSCISIC ACID RESPONSIVE ELEMENTS-BINDING FACTOR 3)	Zm00001d002312	21	38	-	6.52e-06	GTTGGGTGACGTGGCTGG	Zea mays
Zm00001d044940	ABF3 (ABSCISIC ACID RESPONSIVE ELEMENTS-BINDING FACTOR 3)	Zm00001d002535	86	103	-	9.23e-06	TTGAGGTGACGTGGAGTA	Zea mays
Zm00001d044940	ABF3 (ABSCISIC ACID RESPONSIVE ELEMENTS-BINDING FACTOR 3)	Zm00001d002715	177	194	-	3e-06	GGGAGAAGACGTGGCGCG	Zea mays
Zm00001d044940	ABF3 (ABSCISIC ACID RESPONSIVE ELEMENTS-BINDING FACTOR 3)	Zm00001d002725	442	459	+	1.76e-06	AGCTGCTCACGTGTCACG	Zea mays
Zm00001d044940	ABF3 (ABSCISIC ACID RESPONSIVE ELEMENTS-BINDING FACTOR 3)	Zm00001d003091	146	163	-	3.4e-07	GAAGGATGACGTGGCAAC	Zea mays
Zm00001d044940	ABF3 (ABSCISIC ACID RESPONSIVE ELEMENTS-BINDING FACTOR 3)	Zm00001d003414	405	422	-	4.75e-06	AGAAAGAGACGTGGCGCC	Zea mays
Zm00001d044940	ABF3 (ABSCISIC ACID RESPONSIVE ELEMENTS-BINDING FACTOR 3)	Zm00001d003530	334	351	-	4.63e-06	ACTTGGTGACGTGGAAGC	Zea mays
Zm00001d044940	ABF3 (ABSCISIC ACID RESPONSIVE ELEMENTS-BINDING FACTOR 3)	Zm00001d003857	392	409	+	4.47e-06	CGAGTCAGACGTGGCAGC	Zea mays
Zm00001d044940	ABF3 (ABSCISIC ACID RESPONSIVE ELEMENTS-BINDING FACTOR 3)	Zm00001d003966	295	312	+	2e-06	ATTTGTAGACGTGGCACA	Zea mays
Zm00001d044940	ABF3 (ABSCISIC ACID RESPONSIVE ELEMENTS-BINDING FACTOR 3)	Zm00001d005164	366	383	-	2.75e-06	GCGGGGTGACGTGGCGGG	Zea mays
Zm00001d044940	ABF3 (ABSCISIC ACID RESPONSIVE ELEMENTS-BINDING FACTOR 3)	Zm00001d005563	154	171	+	3.61e-06	GACAGCCGACGTGGCAAG	Zea mays
Zm00001d044940	ABF3 (ABSCISIC ACID RESPONSIVE ELEMENTS-BINDING FACTOR 3)	Zm00001d005798	306	323	+	3.79e-07	GAGAGCTGACGTGGCAGG	Zea mays
Zm00001d044940	ABF3 (ABSCISIC ACID RESPONSIVE ELEMENTS-BINDING FACTOR 3)	Zm00001d006630	78	95	-	4.51e-06	GCTTCGTGACGTGGCAGT	Zea mays
Zm00001d044940	ABF3 (ABSCISIC ACID RESPONSIVE ELEMENTS-BINDING FACTOR 3)	Zm00001d007716	450	467	-	7.6e-06	GGCCGGACACGTGGCGAG	Zea mays
Zm00001d044940	ABF3 (ABSCISIC ACID RESPONSIVE ELEMENTS-BINDING FACTOR 3)	Zm00001d007803	74	91	-	3.82e-06	GAGCTATGACGTGGCAGC	Zea mays
Zm00001d044940	ABF3 (ABSCISIC ACID RESPONSIVE ELEMENTS-BINDING FACTOR 3)	Zm00001d009404	336	353	-	6.88e-06	GGGAGGCGACGTGGAAGA	Zea mays
Zm00001d044940	ABF3 (ABSCISIC ACID RESPONSIVE ELEMENTS-BINDING FACTOR 3)	Zm00001d009473	356	373	-	2.18e-06	GAAGGAACACGTGGCGGG	Zea mays
Zm00001d044940	ABF3 (ABSCISIC ACID RESPONSIVE ELEMENTS-BINDING FACTOR 3)	Zm00001d010821	455	472	-	9.84e-07	TAAAGAAGACGTGTCAAT	Zea mays
Zm00001d044940	ABF3 (ABSCISIC ACID RESPONSIVE ELEMENTS-BINDING FACTOR 3)	Zm00001d010855	370	387	-	6.66e-07	GCGTGGTGACGTGGCGGC	Zea mays
Zm00001d044940	ABF3 (ABSCISIC ACID RESPONSIVE ELEMENTS-BINDING FACTOR 3)	Zm00001d011269	443	460	-	2.16e-06	AACTAGTGACGTGTCAGT	Zea mays
Zm00001d044940	ABF3 (ABSCISIC ACID RESPONSIVE ELEMENTS-BINDING FACTOR 3)	Zm00001d011751	172	189	+	1.28e-07	GATTGCTGACGTGGCACA	Zea mays
Zm00001d044940	ABF3 (ABSCISIC ACID RESPONSIVE ELEMENTS-BINDING FACTOR 3)	Zm00001d012482	275	292	-	6.08e-06	CGGTGGCGACGTGGCTGC	Zea mays
Zm00001d044940	ABF3 (ABSCISIC ACID RESPONSIVE ELEMENTS-BINDING FACTOR 3)	Zm00001d012868	471	488	+	9.56e-06	GAGAGGCCACGTGTCCAC	Zea mays
Zm00001d044940	ABF3 (ABSCISIC ACID RESPONSIVE ELEMENTS-BINDING FACTOR 3)	Zm00001d013097	343	360	-	9.13e-07	TTTCGGTGACGTGGCACA	Zea mays
Zm00001d044940	ABF3 (ABSCISIC ACID RESPONSIVE ELEMENTS-BINDING FACTOR 3)	Zm00001d013151	10	27	+	3.75e-06	TAAAAGAGACGTGTCAGT	Zea mays
Zm00001d044940	ABF3 (ABSCISIC ACID RESPONSIVE ELEMENTS-BINDING FACTOR 3)	Zm00001d013736	124	141	-	2.16e-06	GCTGTGTGACGTGGCAGT	Zea mays
Zm00001d044940	ABF3 (ABSCISIC ACID RESPONSIVE ELEMENTS-BINDING FACTOR 3)	Zm00001d013927	134	151	+	6.48e-07	TTCTTGTGACGTGGCAGC	Zea mays
Zm00001d044940	ABF3 (ABSCISIC ACID RESPONSIVE ELEMENTS-BINDING FACTOR 3)	Zm00001d016950	168	185	-	3.58e-06	AGAAAGAGACGTGGCGGC	Zea mays
Zm00001d044940	ABF3 (ABSCISIC ACID RESPONSIVE ELEMENTS-BINDING FACTOR 3)	Zm00001d017364	83	100	+	6.32e-06	CAGTTGCCACGTGGCGAG	Zea mays
Zm00001d044940	ABF3 (ABSCISIC ACID RESPONSIVE ELEMENTS-BINDING FACTOR 3)	Zm00001d017809	384	401	-	8.45e-07	AACAGGCCACGTGGCAAG	Zea mays
Zm00001d044940	ABF3 (ABSCISIC ACID RESPONSIVE ELEMENTS-BINDING FACTOR 3)	Zm00001d019734	311	328	-	6.62e-06	TCAGGCTGACGTGGCCAT	Zea mays
Zm00001d044940	ABF3 (ABSCISIC ACID RESPONSIVE ELEMENTS-BINDING FACTOR 3)	Zm00001d020280	399	416	+	5.79e-06	GATGGCCCACGTGTCATA	Zea mays
Zm00001d044940	ABF3 (ABSCISIC ACID RESPONSIVE ELEMENTS-BINDING FACTOR 3)	Zm00001d021518	89	106	+	6.52e-06	GCCGGGCGACGTGGCGGT	Zea mays
Zm00001d044940	ABF3 (ABSCISIC ACID RESPONSIVE ELEMENTS-BINDING FACTOR 3)	Zm00001d022327	304	321	-	8.06e-06	GCGTGGCGACGTGTCGCC	Zea mays
Zm00001d044940	ABF3 (ABSCISIC ACID RESPONSIVE ELEMENTS-BINDING FACTOR 3)	Zm00001d022439	480	497	-	3.36e-06	ACCGGGAGACGTGGCGCT	Zea mays
Zm00001d044940	ABF3 (ABSCISIC ACID RESPONSIVE ELEMENTS-BINDING FACTOR 3)	Zm00001d023278	120	137	-	5.34e-06	TGGCTGTGACGTGGCGGC	Zea mays
Zm00001d044940	ABF3 (ABSCISIC ACID RESPONSIVE ELEMENTS-BINDING FACTOR 3)	Zm00001d023811	425	442	-	6.03e-06	GCTTGGTGACGTGGAAAT	Zea mays
Zm00001d044940	ABF3 (ABSCISIC ACID RESPONSIVE ELEMENTS-BINDING FACTOR 3)	Zm00001d024574	460	477	-	4.32e-06	ACTGGACGACGTGGCAAC	Zea mays
Zm00001d044940	ABF3 (ABSCISIC ACID RESPONSIVE ELEMENTS-BINDING FACTOR 3)	Zm00001d024734	184	201	-	5.66e-06	GACGGACGACGTGGCGAT	Zea mays
Zm00001d044940	ABF3 (ABSCISIC ACID RESPONSIVE ELEMENTS-BINDING FACTOR 3)	Zm00001d025129	442	459	-	2.05e-06	AAAAAATGACGTGGCATC	Zea mays
Zm00001d044940	ABF3 (ABSCISIC ACID RESPONSIVE ELEMENTS-BINDING FACTOR 3)	Zm00001d025305	333	350	+	8.91e-06	CGACTCAGACGTGGCAGC	Zea mays
Zm00001d044940	ABF3 (ABSCISIC ACID RESPONSIVE ELEMENTS-BINDING FACTOR 3)	Zm00001d026670	411	428	-	1.63e-06	GAATGATGACGTGGCTTT	Zea mays
Zm00001d044940	ABF3 (ABSCISIC ACID RESPONSIVE ELEMENTS-BINDING FACTOR 3)	Zm00001d027760	119	136	+	3.39e-06	ATATTCCCACGTGGCGTT	Zea mays
Zm00001d044940	ABF3 (ABSCISIC ACID RESPONSIVE ELEMENTS-BINDING FACTOR 3)	Zm00001d028867	272	289	-	7.05e-06	ACGAGACGACGTGTCACC	Zea mays
Zm00001d044940	ABF3 (ABSCISIC ACID RESPONSIVE ELEMENTS-BINDING FACTOR 3)	Zm00001d030091	433	450	+	3.79e-07	GATTGCTGACGTGGCACG	Zea mays
Zm00001d044940	ABF3 (ABSCISIC ACID RESPONSIVE ELEMENTS-BINDING FACTOR 3)	Zm00001d030614	172	189	-	1.41e-06	TGGATCTGACGTGGCAGC	Zea mays
Zm00001d044940	ABF3 (ABSCISIC ACID RESPONSIVE ELEMENTS-BINDING FACTOR 3)	Zm00001d030762	408	425	-	7.15e-06	TCCTGCACACGTGGCCGT	Zea mays
Zm00001d044940	ABF3 (ABSCISIC ACID RESPONSIVE ELEMENTS-BINDING FACTOR 3)	Zm00001d030942	111	128	-	4.79e-06	ACATGTAGACGTGGCACG	Zea mays
Zm00001d044940	ABF3 (ABSCISIC ACID RESPONSIVE ELEMENTS-BINDING FACTOR 3)	Zm00001d031850	339	356	+	2.97e-06	AGGATCTGACGTGTCAGC	Zea mays
Zm00001d044940	ABF3 (ABSCISIC ACID RESPONSIVE ELEMENTS-BINDING FACTOR 3)	Zm00001d033594	429	446	-	2.32e-06	ATCGGGTGACGTGGCCAA	Zea mays
Zm00001d044940	ABF3 (ABSCISIC ACID RESPONSIVE ELEMENTS-BINDING FACTOR 3)	Zm00001d034197	216	233	-	2.49e-08	AGAGGGTGACGTGGCAGC	Zea mays
Zm00001d044940	ABF3 (ABSCISIC ACID RESPONSIVE ELEMENTS-BINDING FACTOR 3)	Zm00001d034564	391	408	-	5.61e-06	GGGCTGACACGTGGCACG	Zea mays
Zm00001d044940	ABF3 (ABSCISIC ACID RESPONSIVE ELEMENTS-BINDING FACTOR 3)	Zm00001d036533	195	212	-	3.79e-07	GAGAGCTGACGTGGCAGG	Zea mays
Zm00001d044940	ABF3 (ABSCISIC ACID RESPONSIVE ELEMENTS-BINDING FACTOR 3)	Zm00001d037747	380	397	-	9.82e-06	TGAGGTTGACGTGGCGTG	Zea mays
Zm00001d044940	ABF3 (ABSCISIC ACID RESPONSIVE ELEMENTS-BINDING FACTOR 3)	Zm00001d037926	449	466	+	5.25e-06	CGACGCTGACGTGGCGAA	Zea mays
Zm00001d044940	ABF3 (ABSCISIC ACID RESPONSIVE ELEMENTS-BINDING FACTOR 3)	Zm00001d039029	471	488	+	8.97e-06	GATTTTTGACGTGTCAGA	Zea mays
Zm00001d044940	ABF3 (ABSCISIC ACID RESPONSIVE ELEMENTS-BINDING FACTOR 3)	Zm00001d039312	358	375	+	4.75e-06	GAACGGCCACGTGGCGCC	Zea mays
Zm00001d044940	ABF3 (ABSCISIC ACID RESPONSIVE ELEMENTS-BINDING FACTOR 3)	Zm00001d039468	225	242	+	2.22e-07	GGGGGGTGACGTGGCACC	Zea mays
Zm00001d044940	ABF3 (ABSCISIC ACID RESPONSIVE ELEMENTS-BINDING FACTOR 3)	Zm00001d040755	73	90	-	5.17e-06	AATATTTGACGTGGCACA	Zea mays
Zm00001d044940	ABF3 (ABSCISIC ACID RESPONSIVE ELEMENTS-BINDING FACTOR 3)	Zm00001d041819	304	321	-	8.41e-06	CGTATGACACGTGGCGAG	Zea mays
Zm00001d044940	ABF3 (ABSCISIC ACID RESPONSIVE ELEMENTS-BINDING FACTOR 3)	Zm00001d043025	309	326	-	7.54e-06	CGGTGGCGACGTGGCTGG	Zea mays
Zm00001d044940	ABF3 (ABSCISIC ACID RESPONSIVE ELEMENTS-BINDING FACTOR 3)	Zm00001d043491	226	243	+	1.43e-06	GAGAGGAGACGTGGCCAA	Zea mays
Zm00001d044940	ABF3 (ABSCISIC ACID RESPONSIVE ELEMENTS-BINDING FACTOR 3)	Zm00001d044769	51	68	-	6.03e-06	GACGGCCCACGTGTCAGT	Zea mays
Zm00001d044940	ABF3 (ABSCISIC ACID RESPONSIVE ELEMENTS-BINDING FACTOR 3)	Zm00001d045145	1	18	-	3.96e-06	TGAATGTCACGTGGCTGT	Zea mays
Zm00001d044940	ABF3 (ABSCISIC ACID RESPONSIVE ELEMENTS-BINDING FACTOR 3)	Zm00001d045366	129	146	+	2.8e-06	AAAGGATGACGTGGCTTA	Zea mays
Zm00001d044940	ABF3 (ABSCISIC ACID RESPONSIVE ELEMENTS-BINDING FACTOR 3)	Zm00001d046467	194	211	-	7.77e-06	GGATATTGACGTGGCATA	Zea mays
Zm00001d044940	ABF3 (ABSCISIC ACID RESPONSIVE ELEMENTS-BINDING FACTOR 3)	Zm00001d046540	112	129	-	5.17e-06	AGGTACCCACGTGGCAGG	Zea mays
Zm00001d044940	ABF3 (ABSCISIC ACID RESPONSIVE ELEMENTS-BINDING FACTOR 3)	Zm00001d047769	140	157	+	6.27e-06	GGACGCACACGTGGCGTC	Zea mays
Zm00001d044940	ABF3 (ABSCISIC ACID RESPONSIVE ELEMENTS-BINDING FACTOR 3)	Zm00001d047998	202	219	+	7.88e-06	ACTTTAAGACGTGTCAAC	Zea mays
Zm00001d044940	ABF3 (ABSCISIC ACID RESPONSIVE ELEMENTS-BINDING FACTOR 3)	Zm00001d048693	431	448	+	9.48e-07	ATTTGGCGACGTGGCGAC	Zea mays
Zm00001d044940	ABF3 (ABSCISIC ACID RESPONSIVE ELEMENTS-BINDING FACTOR 3)	Zm00001d049049	483	500	-	2.07e-06	AAGCGAACACGTGGCGGT	Zea mays
Zm00001d044940	ABF3 (ABSCISIC ACID RESPONSIVE ELEMENTS-BINDING FACTOR 3)	Zm00001d049960	100	117	-	9.29e-06	AAGGGCCCACGTGGCCCG	Zea mays
Zm00001d044940	ABF3 (ABSCISIC ACID RESPONSIVE ELEMENTS-BINDING FACTOR 3)	Zm00001d051761	221	238	+	9.62e-06	TTTTTGCGACGTGGCTGT	Zea mays
Zm00001d044940	ABF3 (ABSCISIC ACID RESPONSIVE ELEMENTS-BINDING FACTOR 3)	Zm00001d052247	191	208	+	8.29e-06	TCTGTCTGACGTGGCACC	Zea mays
Zm00001d044940	ABF3 (ABSCISIC ACID RESPONSIVE ELEMENTS-BINDING FACTOR 3)	Zm00001d052927	464	481	-	3.39e-08	ACGTGGTCACGTGGCAAT	Zea mays
Zm00001d044940	ABF3 (ABSCISIC ACID RESPONSIVE ELEMENTS-BINDING FACTOR 3)	Zm00001d053195	444	461	-	9.29e-06	GCGTGGACACGTGTCCGG	Zea mays
Zm00001d044940	ABF3 (ABSCISIC ACID RESPONSIVE ELEMENTS-BINDING FACTOR 3)	Zm00001d053781	262	279	+	1.28e-06	AGAAGGCGACGTGGCGCG	Zea mays
Zm00001d011985	TCP transcription factor family	Zm00001d000428	430	438	-	2.53e-06	GGGGCCCAC	Zea mays
Zm00001d011985	TCP transcription factor family	Zm00001d000914	305	313	-	5.05e-06	GGGCCCCAC	Zea mays
Zm00001d011985	TCP transcription factor family	Zm00001d001862	269	277	+	7.58e-06	CGGGCCCAC	Zea mays
Zm00001d011985	TCP transcription factor family	Zm00001d002028	141	149	-	5.05e-06	GGGCCCCAC	Zea mays
Zm00001d011985	TCP transcription factor family	Zm00001d002283	191	199	+	5.05e-06	GGGCCCCAC	Zea mays
Zm00001d011985	TCP transcription factor family	Zm00001d002374	342	350	-	5.05e-06	GGGCCCCAC	Zea mays
Zm00001d011985	TCP transcription factor family	Zm00001d002454	449	457	+	5.05e-06	GGGCCCCAC	Zea mays
Zm00001d011985	TCP transcription factor family	Zm00001d002591	329	337	+	7.58e-06	CGGGCCCAC	Zea mays
Zm00001d011985	TCP transcription factor family	Zm00001d003962	315	323	-	5.05e-06	GGGCCCCAC	Zea mays
Zm00001d011985	TCP transcription factor family	Zm00001d004203	290	298	+	7.58e-06	CGGGCCCAC	Zea mays
Zm00001d011985	TCP transcription factor family	Zm00001d005164	442	450	+	5.05e-06	GGGCCCCAC	Zea mays
Zm00001d011985	TCP transcription factor family	Zm00001d005193	354	362	-	5.05e-06	GGGCCCCAC	Zea mays
Zm00001d011985	TCP transcription factor family	Zm00001d005315	107	115	-	7.58e-06	CGGGCCCAC	Zea mays
Zm00001d011985	TCP transcription factor family	Zm00001d005798	390	398	+	5.05e-06	GGGCCCCAC	Zea mays
Zm00001d011985	TCP transcription factor family	Zm00001d007180	367	375	+	7.58e-06	CGGGCCCAC	Zea mays
Zm00001d011985	TCP transcription factor family	Zm00001d007915	336	344	+	7.58e-06	CGGGCCCAC	Zea mays
Zm00001d011985	TCP transcription factor family	Zm00001d008273	410	418	+	7.58e-06	CGGGCCCAC	Zea mays
Zm00001d011985	TCP transcription factor family	Zm00001d008631	379	387	-	2.53e-06	GGGGCCCAC	Zea mays
Zm00001d011985	TCP transcription factor family	Zm00001d009596	45	53	-	2.53e-06	GGGGCCCAC	Zea mays
Zm00001d011985	TCP transcription factor family	Zm00001d009631	416	424	-	2.53e-06	GGGGCCCAC	Zea mays
Zm00001d011985	TCP transcription factor family	Zm00001d009858	437	445	-	5.05e-06	GGGCCCCAC	Zea mays
Zm00001d011985	TCP transcription factor family	Zm00001d010421	303	311	+	7.58e-06	CGGGCCCAC	Zea mays
Zm00001d011985	TCP transcription factor family	Zm00001d012224	136	144	+	5.05e-06	GGGCCCCAC	Zea mays
Zm00001d011985	TCP transcription factor family	Zm00001d015091	320	328	+	7.58e-06	CGGGCCCAC	Zea mays
Zm00001d011985	TCP transcription factor family	Zm00001d015515	96	104	+	5.05e-06	GGGCCCCAC	Zea mays
Zm00001d011985	TCP transcription factor family	Zm00001d016225	65	73	+	5.05e-06	GGGCCCCAC	Zea mays
Zm00001d011985	TCP transcription factor family	Zm00001d017203	488	496	+	7.58e-06	CGGGCCCAC	Zea mays
Zm00001d011985	TCP transcription factor family	Zm00001d018754	436	444	+	5.05e-06	GGGCCCCAC	Zea mays
Zm00001d011985	TCP transcription factor family	Zm00001d019547	6	14	+	2.53e-06	GGGGCCCAC	Zea mays
Zm00001d011985	TCP transcription factor family	Zm00001d019836	481	489	+	5.05e-06	GGGCCCCAC	Zea mays
Zm00001d011985	TCP transcription factor family	Zm00001d020595	406	414	+	5.05e-06	GGGCCCCAC	Zea mays
Zm00001d011985	TCP transcription factor family	Zm00001d020887	333	341	-	7.58e-06	CGGGCCCAC	Zea mays
Zm00001d011985	TCP transcription factor family	Zm00001d021120	381	389	+	7.58e-06	CGGGCCCAC	Zea mays
Zm00001d011985	TCP transcription factor family	Zm00001d021583	449	457	+	2.53e-06	GGGGCCCAC	Zea mays
Zm00001d011985	TCP transcription factor family	Zm00001d021634	372	380	+	5.05e-06	GGGCCCCAC	Zea mays
Zm00001d011985	TCP transcription factor family	Zm00001d021935	383	391	-	7.58e-06	CGGGCCCAC	Zea mays
Zm00001d011985	TCP transcription factor family	Zm00001d022005	367	375	+	7.58e-06	CGGGCCCAC	Zea mays
Zm00001d011985	TCP transcription factor family	Zm00001d022092	5	13	-	7.58e-06	CGGGCCCAC	Zea mays
Zm00001d011985	TCP transcription factor family	Zm00001d022139	297	305	+	5.05e-06	GGGCCCCAC	Zea mays
Zm00001d011985	TCP transcription factor family	Zm00001d024835	81	89	+	2.53e-06	GGGGCCCAC	Zea mays
Zm00001d011985	TCP transcription factor family	Zm00001d025099	271	279	+	7.58e-06	CGGGCCCAC	Zea mays
Zm00001d011985	TCP transcription factor family	Zm00001d025799	435	443	+	5.05e-06	GGGCCCCAC	Zea mays
Zm00001d011985	TCP transcription factor family	Zm00001d025827	402	410	-	5.05e-06	GGGCCCCAC	Zea mays
Zm00001d011985	TCP transcription factor family	Zm00001d026337	310	318	-	7.58e-06	CGGGCCCAC	Zea mays
Zm00001d011985	TCP transcription factor family	Zm00001d026366	437	445	+	7.58e-06	CGGGCCCAC	Zea mays
Zm00001d011985	TCP transcription factor family	Zm00001d026490	257	265	+	7.58e-06	CGGGCCCAC	Zea mays
Zm00001d011985	TCP transcription factor family	Zm00001d026677	189	197	+	5.05e-06	GGGCCCCAC	Zea mays
Zm00001d011985	TCP transcription factor family	Zm00001d027519	382	390	-	7.58e-06	CGGGCCCAC	Zea mays
Zm00001d011985	TCP transcription factor family	Zm00001d027708	386	394	+	7.58e-06	CGGGCCCAC	Zea mays
Zm00001d011985	TCP transcription factor family	Zm00001d027722	435	443	+	5.05e-06	GGGCCCCAC	Zea mays
Zm00001d011985	TCP transcription factor family	Zm00001d027727	305	313	+	7.58e-06	CGGGCCCAC	Zea mays
Zm00001d011985	TCP transcription factor family	Zm00001d028565	443	451	+	5.05e-06	GGGCCCCAC	Zea mays
Zm00001d011985	TCP transcription factor family	Zm00001d028704	83	91	-	7.58e-06	CGGGCCCAC	Zea mays
Zm00001d011985	TCP transcription factor family	Zm00001d029560	461	469	+	7.58e-06	CGGGCCCAC	Zea mays
Zm00001d011985	TCP transcription factor family	Zm00001d029684	438	446	+	5.05e-06	GGGCCCCAC	Zea mays
Zm00001d011985	TCP transcription factor family	Zm00001d030688	423	431	-	5.05e-06	GGGCCCCAC	Zea mays
Zm00001d011985	TCP transcription factor family	Zm00001d030999	421	429	-	2.53e-06	GGGGCCCAC	Zea mays
Zm00001d011985	TCP transcription factor family	Zm00001d031128	9	17	+	5.05e-06	GGGCCCCAC	Zea mays
Zm00001d011985	TCP transcription factor family	Zm00001d031527	214	222	+	5.05e-06	GGGCCCCAC	Zea mays
Zm00001d011985	TCP transcription factor family	Zm00001d031875	281	289	-	2.53e-06	GGGGCCCAC	Zea mays
Zm00001d011985	TCP transcription factor family	Zm00001d032114	449	457	+	7.58e-06	CGGGCCCAC	Zea mays
Zm00001d011985	TCP transcription factor family	Zm00001d032279	459	467	+	5.05e-06	GGGCCCCAC	Zea mays
Zm00001d011985	TCP transcription factor family	Zm00001d032333	435	443	+	5.05e-06	GGGCCCCAC	Zea mays
Zm00001d011985	TCP transcription factor family	Zm00001d032356	113	121	-	5.05e-06	GGGCCCCAC	Zea mays
Zm00001d011985	TCP transcription factor family	Zm00001d032363	315	323	+	2.53e-06	GGGGCCCAC	Zea mays
Zm00001d011985	TCP transcription factor family	Zm00001d032552	193	201	-	2.53e-06	GGGGCCCAC	Zea mays
Zm00001d011985	TCP transcription factor family	Zm00001d032685	482	490	-	5.05e-06	GGGCCCCAC	Zea mays
Zm00001d011985	TCP transcription factor family	Zm00001d033003	236	244	+	7.58e-06	CGGGCCCAC	Zea mays
Zm00001d011985	TCP transcription factor family	Zm00001d033503	400	408	-	5.05e-06	GGGCCCCAC	Zea mays
Zm00001d011985	TCP transcription factor family	Zm00001d033719	362	370	+	5.05e-06	GGGCCCCAC	Zea mays
Zm00001d011985	TCP transcription factor family	Zm00001d033910	424	432	-	7.58e-06	CGGGCCCAC	Zea mays
Zm00001d011985	TCP transcription factor family	Zm00001d034194	390	398	-	2.53e-06	GGGGCCCAC	Zea mays
Zm00001d011985	TCP transcription factor family	Zm00001d034745	252	260	+	5.05e-06	GGGCCCCAC	Zea mays
Zm00001d011985	TCP transcription factor family	Zm00001d034900	489	497	-	5.05e-06	GGGCCCCAC	Zea mays
Zm00001d011985	TCP transcription factor family	Zm00001d035037	403	411	+	7.58e-06	CGGGCCCAC	Zea mays
Zm00001d011985	TCP transcription factor family	Zm00001d035183	393	401	-	7.58e-06	CGGGCCCAC	Zea mays
Zm00001d011985	TCP transcription factor family	Zm00001d035629	423	431	-	5.05e-06	GGGCCCCAC	Zea mays
Zm00001d011985	TCP transcription factor family	Zm00001d036137	378	386	+	7.58e-06	CGGGCCCAC	Zea mays
Zm00001d011985	TCP transcription factor family	Zm00001d036539	396	404	-	5.05e-06	GGGCCCCAC	Zea mays
Zm00001d011985	TCP transcription factor family	Zm00001d036761	467	475	-	5.05e-06	GGGCCCCAC	Zea mays
Zm00001d011985	TCP transcription factor family	Zm00001d037757	274	282	+	5.05e-06	GGGCCCCAC	Zea mays
Zm00001d011985	TCP transcription factor family	Zm00001d037982	426	434	+	5.05e-06	GGGCCCCAC	Zea mays
Zm00001d011985	TCP transcription factor family	Zm00001d038126	416	424	+	5.05e-06	GGGCCCCAC	Zea mays
Zm00001d011985	TCP transcription factor family	Zm00001d038262	358	366	-	5.05e-06	GGGCCCCAC	Zea mays
Zm00001d011985	TCP transcription factor family	Zm00001d038389	393	401	-	7.58e-06	CGGGCCCAC	Zea mays
Zm00001d011985	TCP transcription factor family	Zm00001d038768	375	383	+	5.05e-06	GGGCCCCAC	Zea mays
Zm00001d011985	TCP transcription factor family	Zm00001d038841	445	453	+	5.05e-06	GGGCCCCAC	Zea mays
Zm00001d011985	TCP transcription factor family	Zm00001d039011	201	209	+	7.58e-06	CGGGCCCAC	Zea mays
Zm00001d011985	TCP transcription factor family	Zm00001d039400	213	221	+	5.05e-06	GGGCCCCAC	Zea mays
Zm00001d011985	TCP transcription factor family	Zm00001d039416	266	274	+	7.58e-06	CGGGCCCAC	Zea mays
Zm00001d011985	TCP transcription factor family	Zm00001d039718	254	262	-	5.05e-06	GGGCCCCAC	Zea mays
Zm00001d011985	TCP transcription factor family	Zm00001d040422	363	371	+	5.05e-06	GGGCCCCAC	Zea mays
Zm00001d011985	TCP transcription factor family	Zm00001d041511	236	244	+	2.53e-06	GGGGCCCAC	Zea mays
Zm00001d011985	TCP transcription factor family	Zm00001d043613	421	429	-	7.58e-06	CGGGCCCAC	Zea mays
Zm00001d011985	TCP transcription factor family	Zm00001d043944	314	322	-	7.58e-06	CGGGCCCAC	Zea mays
Zm00001d011985	TCP transcription factor family	Zm00001d044691	334	342	-	2.53e-06	GGGGCCCAC	Zea mays
Zm00001d011985	TCP transcription factor family	Zm00001d045112	366	374	+	5.05e-06	GGGCCCCAC	Zea mays
Zm00001d011985	TCP transcription factor family	Zm00001d045387	364	372	+	7.58e-06	CGGGCCCAC	Zea mays
Zm00001d011985	TCP transcription factor family	Zm00001d046364	228	236	+	5.05e-06	GGGCCCCAC	Zea mays
Zm00001d011985	TCP transcription factor family	Zm00001d046530	334	342	+	5.05e-06	GGGCCCCAC	Zea mays
Zm00001d011985	TCP transcription factor family	Zm00001d046632	128	136	+	5.05e-06	GGGCCCCAC	Zea mays
Zm00001d011985	TCP transcription factor family	Zm00001d046961	161	169	+	5.05e-06	GGGCCCCAC	Zea mays
Zm00001d011985	TCP transcription factor family	Zm00001d047207	447	455	+	7.58e-06	CGGGCCCAC	Zea mays
Zm00001d011985	TCP transcription factor family	Zm00001d047761	376	384	-	2.53e-06	GGGGCCCAC	Zea mays
Zm00001d011985	TCP transcription factor family	Zm00001d049525	4	12	-	7.58e-06	CGGGCCCAC	Zea mays
Zm00001d011985	TCP transcription factor family	Zm00001d049610	315	323	-	7.58e-06	CGGGCCCAC	Zea mays
Zm00001d011985	TCP transcription factor family	Zm00001d049643	345	353	+	7.58e-06	CGGGCCCAC	Zea mays
Zm00001d011985	TCP transcription factor family	Zm00001d049769	332	340	+	7.58e-06	CGGGCCCAC	Zea mays
Zm00001d011985	TCP transcription factor family	Zm00001d051761	489	497	+	7.58e-06	CGGGCCCAC	Zea mays
Zm00001d011985	TCP transcription factor family	Zm00001d052661	319	327	-	2.53e-06	GGGGCCCAC	Zea mays
Zm00001d011985	TCP transcription factor family	Zm00001d052738	80	88	+	5.05e-06	GGGCCCCAC	Zea mays
Zm00001d011985	TCP transcription factor family	Zm00001d052962	186	194	-	7.58e-06	CGGGCCCAC	Zea mays
Zm00001d011985	TCP transcription factor family	Zm00001d053091	358	366	+	7.58e-06	CGGGCCCAC	Zea mays
Zm00001d011985	TCP transcription factor family	Zm00001d054043	192	200	-	5.05e-06	GGGCCCCAC	Zea mays
Zm00001d011985	TCP transcription factor family	Zm00001d054044	340	348	-	5.05e-06	GGGCCCCAC	Zea mays
Zm00001d020457	MYB30	Zm00001d001832	323	337	+	4.41e-06	ATACCAACCACAACC	Zea mays
Zm00001d020457	MYB30	Zm00001d002309	154	168	-	2.43e-06	CCAACAACTACCTCC	Zea mays
Zm00001d020457	MYB30	Zm00001d002898	310	324	+	2.17e-06	TCACCACCTACCACC	Zea mays
Zm00001d020457	MYB30	Zm00001d003830	183	197	-	2.29e-06	ACACCAACCAACAAC	Zea mays
Zm00001d020457	MYB30	Zm00001d004545	444	458	+	3.07e-06	CTCTCAACCGCCTAC	Zea mays
Zm00001d020457	MYB30	Zm00001d005010	421	435	+	2.43e-06	CTCACAACCACCCAC	Zea mays
Zm00001d020457	MYB30	Zm00001d006759	125	139	-	5.32e-06	TCCCCAACTGCCCCC	Zea mays
Zm00001d020457	MYB30	Zm00001d006875	158	172	+	9.66e-07	GTACCAACCACCAAA	Zea mays
Zm00001d020457	MYB30	Zm00001d008305	403	417	+	3.07e-06	TCCCCAACCGCCCCC	Zea mays
Zm00001d020457	MYB30	Zm00001d008875	186	200	+	9.05e-06	TTAACAACCACCTCA	Zea mays
Zm00001d020457	MYB30	Zm00001d010171	381	395	+	8.12e-06	TCCCCCACCACCACC	Zea mays
Zm00001d020457	MYB30	Zm00001d010284	405	419	+	1.84e-07	ACTCCAACCACCAAC	Zea mays
Zm00001d020457	MYB30	Zm00001d011330	486	500	+	8.68e-06	GCATCAACCACCCAC	Zea mays
Zm00001d020457	MYB30	Zm00001d012834	323	337	-	9.05e-06	CATCCAACCACCTCA	Zea mays
Zm00001d020457	MYB30	Zm00001d013208	317	331	+	3.11e-06	ATCACAACCGCCACC	Zea mays
Zm00001d020457	MYB30	Zm00001d013333	236	250	+	3.87e-06	ACACCACCCACCACC	Zea mays
Zm00001d020457	MYB30	Zm00001d014726	15	29	-	9.54e-06	ATACCAACTACCATA	Zea mays
Zm00001d020457	MYB30	Zm00001d017118	290	304	+	5.84e-06	CCACCAACAACCTCC	Zea mays
Zm00001d020457	MYB30	Zm00001d017275	430	444	+	2.49e-06	CCCCCAACAACCTCC	Zea mays
Zm00001d020457	MYB30	Zm00001d017448	476	490	+	3.98e-07	TCACCAACCACCAAT	Zea mays
Zm00001d020457	MYB30	Zm00001d017767	470	484	+	5.91e-06	ACACCAACCACCTCA	Zea mays
Zm00001d020457	MYB30	Zm00001d018130	263	277	+	4.47e-06	CGTCCAACCACCAAT	Zea mays
Zm00001d020457	MYB30	Zm00001d018431	434	448	+	6.15e-06	AATCCAACCACTAAC	Zea mays
Zm00001d020457	MYB30	Zm00001d018488	144	158	+	4.2e-06	TTACCAACTGCTACC	Zea mays
Zm00001d020457	MYB30	Zm00001d018530	384	398	+	8.03e-06	CCCCCACCCACCCAC	Zea mays
Zm00001d020457	MYB30	Zm00001d018623	230	244	-	1.9e-07	CCATCAACCACCACC	Zea mays
Zm00001d020457	MYB30	Zm00001d018631	367	381	+	1.46e-06	TCACCAACCACAACC	Zea mays
Zm00001d020457	MYB30	Zm00001d020280	294	308	+	6.95e-06	TCCCCAACTACCTCG	Zea mays
Zm00001d020457	MYB30	Zm00001d020808	469	483	+	3.59e-06	TCAACAACTACTACC	Zea mays
Zm00001d020457	MYB30	Zm00001d020953	94	108	-	3.02e-06	CTACCAACTACCTAT	Zea mays
Zm00001d020457	MYB30	Zm00001d021659	254	268	+	6.49e-06	CTTCCAACTTCCAAC	Zea mays
Zm00001d020457	MYB30	Zm00001d021737	405	419	+	1.29e-07	TACCCAACTACCACC	Zea mays
Zm00001d020457	MYB30	Zm00001d021739	151	165	+	1.14e-06	GTCCCAACCACCTCT	Zea mays
Zm00001d020457	MYB30	Zm00001d022166	33	47	+	9.41e-06	GCTCCACCCACCATC	Zea mays
Zm00001d020457	MYB30	Zm00001d022234	382	396	+	7.22e-06	TATCCAACCACAACC	Zea mays
Zm00001d020457	MYB30	Zm00001d023374	251	265	+	8.12e-06	TCGCCAACCACAACC	Zea mays
Zm00001d020457	MYB30	Zm00001d024531	37	51	+	2.43e-06	GCAGCAACCACCACC	Zea mays
Zm00001d020457	MYB30	Zm00001d024763	231	245	+	9.94e-06	CCTTCACCTACCACC	Zea mays
Zm00001d020457	MYB30	Zm00001d025726	454	468	+	8.12e-06	TCCCCCACCACCACC	Zea mays
Zm00001d020457	MYB30	Zm00001d025924	431	445	+	2.72e-07	CTAACAACCACCAAC	Zea mays
Zm00001d020457	MYB30	Zm00001d026203	199	213	-	1.01e-06	TCACCAACCACCCCC	Zea mays
Zm00001d020457	MYB30	Zm00001d027332	355	369	-	2.11e-06	CTCCCAACTGCCACT	Zea mays
Zm00001d020457	MYB30	Zm00001d027727	310	324	+	5.1e-06	CCACCAACCAACACA	Zea mays
Zm00001d020457	MYB30	Zm00001d028214	277	291	-	1.49e-06	CTCTCAACTACCACA	Zea mays
Zm00001d020457	MYB30	Zm00001d028941	358	372	+	2.52e-06	ATTCCAACCAACAAC	Zea mays
Zm00001d020457	MYB30	Zm00001d029084	417	431	+	4.88e-06	CAATCAACCACCTAC	Zea mays
Zm00001d020457	MYB30	Zm00001d029251	434	448	-	4.27e-06	CACCCAACCAACTCC	Zea mays
Zm00001d020457	MYB30	Zm00001d030555	399	413	+	4.57e-06	GACCCAACCACTATC	Zea mays
Zm00001d020457	MYB30	Zm00001d030993	341	355	+	7.71e-06	CCCGCAACCACCCCC	Zea mays
Zm00001d020457	MYB30	Zm00001d031222	461	475	+	2.55e-06	GCACCACCCACCAAC	Zea mays
Zm00001d020457	MYB30	Zm00001d032120	72	86	-	8.68e-06	GTGCCAACTGCCAAC	Zea mays
Zm00001d020457	MYB30	Zm00001d032485	287	301	-	1.57e-06	TACCCAACTGCCAAC	Zea mays
Zm00001d020457	MYB30	Zm00001d032685	408	422	+	1.63e-06	ATCCCAACCACCAGC	Zea mays
Zm00001d020457	MYB30	Zm00001d033745	201	215	+	6.23e-06	AACCCAACCACCCAC	Zea mays
Zm00001d020457	MYB30	Zm00001d034022	409	423	+	2.88e-06	GCCCCAACCGCCACA	Zea mays
Zm00001d020457	MYB30	Zm00001d034564	282	296	+	6.57e-06	TCTCCAACCATCTCC	Zea mays
Zm00001d020457	MYB30	Zm00001d034995	349	363	+	1.98e-07	CAACCAACCACCACC	Zea mays
Zm00001d020457	MYB30	Zm00001d035662	382	396	-	8.03e-06	ACCACACCCACCACC	Zea mays
Zm00001d020457	MYB30	Zm00001d036293	154	168	+	3.02e-06	TCCACACCCACCAAC	Zea mays
Zm00001d020457	MYB30	Zm00001d037095	184	198	+	3.44e-06	ACCCCAACCACTAAT	Zea mays
Zm00001d020457	MYB30	Zm00001d037542	480	494	+	8.92e-06	TAATCAACCACCACA	Zea mays
Zm00001d020457	MYB30	Zm00001d038548	411	425	+	8.5e-07	CCCTCAACCACCACA	Zea mays
Zm00001d020457	MYB30	Zm00001d038651	30	44	-	2.85e-07	CTCCCAACTACCAAA	Zea mays
Zm00001d020457	MYB30	Zm00001d039103	373	387	+	8.03e-06	CCCCCACCCACCCAC	Zea mays
Zm00001d020457	MYB30	Zm00001d039616	206	220	-	8.58e-06	GTCCCAACCACAAAA	Zea mays
Zm00001d020457	MYB30	Zm00001d039825	438	452	+	3.02e-06	TCCACACCCACCAAC	Zea mays
Zm00001d020457	MYB30	Zm00001d041580	381	395	+	2.05e-07	TCCCCAACCAACAAC	Zea mays
Zm00001d020457	MYB30	Zm00001d042178	242	256	-	5e-07	TCACCAACCACCAAA	Zea mays
Zm00001d020457	MYB30	Zm00001d042620	461	475	+	7.51e-06	CTCCCACCCACCCAC	Zea mays
Zm00001d020457	MYB30	Zm00001d044230	468	482	+	3.21e-06	GCCTTAACCACCACC	Zea mays
Zm00001d020457	MYB30	Zm00001d044686	250	264	+	7.13e-07	CGCCCAACCACCTCC	Zea mays
Zm00001d020457	MYB30	Zm00001d045788	445	459	-	8.48e-06	CCACCAACCAACTTC	Zea mays
Zm00001d020457	MYB30	Zm00001d046330	98	112	-	4.41e-06	TTCACAACCACCTAA	Zea mays
Zm00001d020457	MYB30	Zm00001d046628	284	298	-	6.32e-06	CTAACAACTAACAAC	Zea mays
Zm00001d020457	MYB30	Zm00001d047743	96	110	-	8.79e-06	CCCCCAACCCCCAAC	Zea mays
Zm00001d020457	MYB30	Zm00001d049239	345	359	+	6.41e-06	TCTTCACCCACCAAC	Zea mays
Zm00001d020457	MYB30	Zm00001d049381	300	314	-	7.83e-06	CATCCAACCACCTCT	Zea mays
Zm00001d020457	MYB30	Zm00001d049541	440	454	-	4.46e-07	TCACCAACCACCACA	Zea mays
Zm00001d020457	MYB30	Zm00001d049954	321	335	-	6e-06	TACCTAACCACCTCC	Zea mays
Zm00001d020457	MYB30	Zm00001d049956	312	326	-	2.04e-06	TCTCCAACCATCAAC	Zea mays
Zm00001d020457	MYB30	Zm00001d050020	293	307	-	1.66e-06	ATACCAACCACCAAA	Zea mays
Zm00001d020457	MYB30	Zm00001d050107	123	137	-	8.36e-06	TCCTCAACCAACACA	Zea mays
Zm00001d020457	MYB30	Zm00001d050840	140	154	+	9.05e-06	CTCCCAACAACCCCC	Zea mays
Zm00001d020457	MYB30	Zm00001d051163	427	441	+	7.32e-06	ACCCCAACAACCTCC	Zea mays
Zm00001d020457	MYB30	Zm00001d052245	165	179	-	7.22e-06	ATCTCAACCACAACC	Zea mays
Zm00001d020457	MYB30	Zm00001d052963	28	42	-	7.71e-06	GACTCAACCACCAAA	Zea mays
Zm00001d020457	MYB30	Zm00001d053055	412	426	+	9.3e-06	TTACCAACAACCACT	Zea mays
Zm00001d020457	MYB30	Zm00001d053172	440	454	+	1.12e-06	CCACCAACCACCCAC	Zea mays
Zm00001d020457	MYB30	Zm00001d053522	33	47	-	4.15e-06	TTCGCAACCACCAAA	Zea mays
Zm00001d025720	Trihelix, Triple-Helix transcription factor family	Zm00001d002974	490	499	+	8.21e-06	TTAACCCCAG	Zea mays
Zm00001d025720	Trihelix, Triple-Helix transcription factor family	Zm00001d005969	422	431	+	8.21e-06	TTAACCCCAG	Zea mays
Zm00001d025720	Trihelix, Triple-Helix transcription factor family	Zm00001d009150	412	421	+	7.27e-06	TTAACCCGAG	Zea mays
Zm00001d025720	Trihelix, Triple-Helix transcription factor family	Zm00001d010244	271	280	-	8.21e-06	TTAACCCCAG	Zea mays
Zm00001d025720	Trihelix, Triple-Helix transcription factor family	Zm00001d012307	81	90	-	3.28e-06	TTAACCATAG	Zea mays
Zm00001d025720	Trihelix, Triple-Helix transcription factor family	Zm00001d014865	86	95	+	6.34e-06	TTAACCAAAG	Zea mays
Zm00001d025720	Trihelix, Triple-Helix transcription factor family	Zm00001d015138	278	287	+	4.22e-06	TTAACCAGGG	Zea mays
Zm00001d025720	Trihelix, Triple-Helix transcription factor family	Zm00001d016902	391	400	+	8.21e-06	TTAACCCCAG	Zea mays
Zm00001d025720	Trihelix, Triple-Helix transcription factor family	Zm00001d027613	285	294	-	3.28e-06	TTAACCATAG	Zea mays
Zm00001d025720	Trihelix, Triple-Helix transcription factor family	Zm00001d029516	339	348	+	4.22e-06	TTAACCAGGG	Zea mays
Zm00001d025720	Trihelix, Triple-Helix transcription factor family	Zm00001d029980	305	314	-	5.16e-06	TTAACCACGG	Zea mays
Zm00001d025720	Trihelix, Triple-Helix transcription factor family	Zm00001d036261	266	275	+	2.1e-06	TTAACCACAG	Zea mays
Zm00001d025720	Trihelix, Triple-Helix transcription factor family	Zm00001d042005	473	482	+	7.27e-06	TTAACCCGAG	Zea mays
Zm00001d025720	Trihelix, Triple-Helix transcription factor family	Zm00001d043166	269	278	+	2.1e-06	TTAACCACAG	Zea mays
Zm00001d025720	Trihelix, Triple-Helix transcription factor family	Zm00001d043299	251	260	-	9.26e-06	TTAACCATGG	Zea mays
Zm00001d025720	Trihelix, Triple-Helix transcription factor family	Zm00001d047814	380	389	-	8.21e-06	TTAACCCCAG	Zea mays
Zm00001d025720	Trihelix, Triple-Helix transcription factor family	Zm00001d047893	449	458	-	9.26e-06	TTAACCATGG	Zea mays
Zm00001d025720	Trihelix, Triple-Helix transcription factor family	Zm00001d048770	187	196	-	6.34e-06	TTAACCAAAG	Zea mays
Zm00001d025720	Trihelix, Triple-Helix transcription factor family	Zm00001d049277	30	39	+	3.28e-06	TTAACCATAG	Zea mays
Zm00001d025720	Trihelix, Triple-Helix transcription factor family	Zm00001d051111	289	298	-	3.28e-06	TTAACCATAG	Zea mays
Zm00001d025720	Trihelix, Triple-Helix transcription factor family	Zm00001d051404	328	337	+	3.28e-06	TTAACCATAG	Zea mays
Zm00001d025720	Trihelix, Triple-Helix transcription factor family	Zm00001d051995	476	485	+	5.16e-06	TTAACCACGG	Zea mays
Zm00001d001948	HB,Homeobox transcription factor family	Zm00001d002000	403	413	-	2.5e-06	CCATTCATTCA	Zea mays
Zm00001d001948	HB,Homeobox transcription factor family	Zm00001d002020	57	67	-	4.96e-06	TCATTCATACA	Zea mays
Zm00001d001948	HB,Homeobox transcription factor family	Zm00001d003715	127	137	-	5.86e-06	ACATTCAATCA	Zea mays
Zm00001d001948	HB,Homeobox transcription factor family	Zm00001d005627	488	498	-	1.59e-06	TCATTCATTTA	Zea mays
Zm00001d001948	HB,Homeobox transcription factor family	Zm00001d005682	279	289	+	8.04e-06	TCATTCAAACA	Zea mays
Zm00001d001948	HB,Homeobox transcription factor family	Zm00001d005932	148	158	-	1.59e-06	TCATTCATTTA	Zea mays
Zm00001d001948	HB,Homeobox transcription factor family	Zm00001d006753	95	105	+	6.8e-06	ACAATCAATCA	Zea mays
Zm00001d001948	HB,Homeobox transcription factor family	Zm00001d007709	413	423	-	6.49e-06	TCATTCATTCT	Zea mays
Zm00001d001948	HB,Homeobox transcription factor family	Zm00001d008073	118	128	+	2.22e-06	TCAATCATTTA	Zea mays
Zm00001d001948	HB,Homeobox transcription factor family	Zm00001d008205	53	63	+	8.91e-06	CCAATCATTTA	Zea mays
[truncated: 4,921 more rows]

## Sheet: 48hpts
TFs	TF type	Targets	Start (bp)	End (bp)	Chain	P-value	Binding site	Species
Zm00001d020938	bZIP transcription factor family	Zm00001d007379	406	420	-	9.21e-06	AGCGATGACGTCTTT	Zea mays
Zm00001d020938	bZIP transcription factor family	Zm00001d017969	190	204	+	9.69e-06	CGTACTGACGTCACG	Zea mays
Zm00001d020938	bZIP transcription factor family	Zm00001d029744	257	271	+	3.45e-07	GGTGGTGACGTCACT	Zea mays
Zm00001d020938	bZIP transcription factor family	Zm00001d039963	336	350	+	7.85e-08	GAAGATGACGTCATC	Zea mays
Zm00001d012746	WRKY65	Zm00001d040777	413	423	-	4.84e-06	TGAAGTCAACG	Zea mays
Zm00001d012746	WRKY65	Zm00001d045210	161	171	+	8.76e-06	CCAAGTCAACG	Zea mays
Zm00001d012746	WRKY65	Zm00001d045211	314	324	-	4.84e-06	TGAAGTCAACG	Zea mays
Zm00001d018656	WRKY57	Zm00001d018627	401	410	-	7.02e-06	CAAGTCAACG	Zea mays
Zm00001d018656	WRKY57	Zm00001d034514	270	279	+	6.08e-06	AAAGTCAACC	Zea mays
Zm00001d018656	WRKY57	Zm00001d040777	413	422	-	3.98e-06	GAAGTCAACG	Zea mays
Zm00001d018656	WRKY57	Zm00001d045210	162	171	+	7.02e-06	CAAGTCAACG	Zea mays
Zm00001d018656	WRKY57	Zm00001d045211	314	323	-	3.98e-06	GAAGTCAACG	Zea mays
Zm00001d046718	bZIP transcription factor family	Zm00001d017969	194	203	+	4.6e-06	CTGACGTCAC	Zea mays
Zm00001d046718	bZIP transcription factor family	Zm00001d029744	261	270	+	8.38e-07	GTGACGTCAC	Zea mays
Zm00001d046718	bZIP transcription factor family	Zm00001d039963	340	349	+	3.77e-06	ATGACGTCAT	Zea mays
Zm00001d052543	bZIP transcription factor family	Zm00001d017969	193	203	+	5.08e-06	ACTGACGTCAC	Zea mays
Zm00001d052543	bZIP transcription factor family	Zm00001d029744	260	270	+	1.31e-06	GGTGACGTCAC	Zea mays
Zm00001d052543	bZIP transcription factor family	Zm00001d039963	339	349	+	4.69e-07	GATGACGTCAT	Zea mays
Zm00001d011712	ABI3/VP1-related B3-domain-containing transcription factor family	Zm00001d012024	449	463	-	5.72e-06	TCATGCATGCATCGA	Zea mays
Zm00001d011712	ABI3/VP1-related B3-domain-containing transcription factor family	Zm00001d015616	124	138	-	2.11e-06	ACAAACATGCATAGA	Zea mays
Zm00001d011712	ABI3/VP1-related B3-domain-containing transcription factor family	Zm00001d021655	370	384	+	4.91e-06	GAACGCATGCATGAA	Zea mays
Zm00001d011712	ABI3/VP1-related B3-domain-containing transcription factor family	Zm00001d042140	329	343	-	7.27e-06	ATATTCATGCATGTG	Zea mays
Zm00001d011712	ABI3/VP1-related B3-domain-containing transcription factor family	Zm00001d043947	30	44	+	2.95e-06	TCACACATGCATGCT	Zea mays
Zm00001d011712	ABI3/VP1-related B3-domain-containing transcription factor family	Zm00001d045843	414	428	+	2.19e-06	AAGAGCATGCATGCA	Zea mays
Zm00001d011712	ABI3/VP1-related B3-domain-containing transcription factor family	Zm00001d048949	319	333	+	9.22e-06	TCCCGCATGCATGCA	Zea mays
Zm00001d011712	ABI3/VP1-related B3-domain-containing transcription factor family	Zm00001d048950	332	346	-	2.43e-07	AGATGCATGCAAGCA	Zea mays
Zm00001d011712	ABI3/VP1-related B3-domain-containing transcription factor family	Zm00001d053001	106	120	+	1.06e-06	ATGTGCATGCAAATA	Zea mays
GRMZM2G042494	NAC domain transcription factor family	Zm00001d010284	326	336	+	7.47e-07	ACACGCAACCT	Zea mays
GRMZM2G042494	NAC domain transcription factor family	Zm00001d029648	65	75	+	1.74e-06	ACACGTAATCT	Zea mays
GRMZM2G042494	NAC domain transcription factor family	Zm00001d048949	160	170	+	7.18e-06	ACACGTCATCT	Zea mays
Zm00001d002618	AP2/EREBP, APETALA2/Ethylene-responsive element binding protein family	Zm00001d032691	180	194	+	9.87e-06	GATCTACCGACATAT	Zea mays
Zm00001d002618	AP2/EREBP, APETALA2/Ethylene-responsive element binding protein family	Zm00001d034095	153	167	+	1.19e-06	TTGCCGCCGACATAG	Zea mays
Zm00001d041576	MYB59	Zm00001d006536	21	30	+	8.01e-06	AGTTAGGTAG	Zea mays
Zm00001d041576	MYB59	Zm00001d041768	348	357	+	2.23e-06	AGTTAGGTAC	Zea mays
Zm00001d049173	WRKY75	Zm00001d040777	411	423	-	6.36e-06	TGAAGTCAACGTC	Zea mays
Zm00001d049173	WRKY75	Zm00001d045210	161	173	+	7.49e-06	CCAAGTCAACGCC	Zea mays
Zm00001d049173	WRKY75	Zm00001d045211	312	324	-	6.36e-06	TGAAGTCAACGTC	Zea mays
Zm00001d014656	C2C2(Zn) GATA transcription factor family	Zm00001d000298	135	149	+	3.69e-06	TCATCATCAATATAA	Zea mays
Zm00001d014656	C2C2(Zn) GATA transcription factor family	Zm00001d012024	386	400	+	1.82e-06	TCATTATCATCATAT	Zea mays
Zm00001d014656	C2C2(Zn) GATA transcription factor family	Zm00001d024752	412	426	+	6.08e-06	TCCTCATCAGCTTCA	Zea mays
Zm00001d014656	C2C2(Zn) GATA transcription factor family	Zm00001d027908	175	189	-	9.4e-06	CAATCATCATCATAT	Zea mays
Zm00001d014656	C2C2(Zn) GATA transcription factor family	Zm00001d032618	395	409	+	8.98e-06	ATATCATCACCATCG	Zea mays
Zm00001d014656	C2C2(Zn) GATA transcription factor family	Zm00001d034095	46	60	+	5.99e-06	TCATCTTCGTCTTCT	Zea mays
Zm00001d014656	C2C2(Zn) GATA transcription factor family	Zm00001d036550	81	95	-	9.08e-06	ACATCATCAATATCT	Zea mays
Zm00001d014656	C2C2(Zn) GATA transcription factor family	Zm00001d048644	31	45	-	3.57e-08	TCATCATCATCACCA	Zea mays
Zm00001d014656	C2C2(Zn) GATA transcription factor family	Zm00001d048913	209	223	+	9.51e-06	CAATCACCATCATCT	Zea mays
Zm00001d014656	C2C2(Zn) GATA transcription factor family	Zm00001d053055	291	305	-	8.79e-06	TCACCATCATGTTCC	Zea mays
Zm00001d040611	HB,Homeobox transcription factor family	Zm00001d017969	195	204	-	6.82e-06	CGTGACGTCA	Zea mays
Zm00001d040611	HB,Homeobox transcription factor family	Zm00001d029744	262	271	-	2.61e-06	AGTGACGTCA	Zea mays
Zm00001d040611	HB,Homeobox transcription factor family	Zm00001d052989	42	51	+	8.6e-06	AGTGACAGCT	Zea mays
Zm00001d041981	AP2/EREBP, APETALA2/Ethylene-responsive element binding protein family	Zm00001d012024	69	81	+	5.44e-06	TCACGTCGGTGAA	Zea mays
Zm00001d041981	AP2/EREBP, APETALA2/Ethylene-responsive element binding protein family	Zm00001d032691	182	194	-	6.73e-06	ATATGTCGGTAGA	Zea mays
Zm00001d041981	AP2/EREBP, APETALA2/Ethylene-responsive element binding protein family	Zm00001d034095	155	167	-	1.61e-06	CTATGTCGGCGGC	Zea mays
Zm00001d028413	AS2,Lateral Organ Boundaries Gene Family	Zm00001d011625	171	189	-	4.61e-08	TTGGCTCCGGATTTTACGG	Zea mays
Zm00001d028413	AS2,Lateral Organ Boundaries Gene Family	Zm00001d029648	395	413	+	5.94e-06	TCTTCTCCGATATATCCGG	Zea mays
Zm00001d028413	AS2,Lateral Organ Boundaries Gene Family	Zm00001d032368	367	385	+	7.11e-06	TTTCCGGCCCCTTTCCCGG	Zea mays
Zm00001d012553	bZIP transcription factor family	Zm00001d017969	185	204	-	6.71e-06	CGTGACGTCAGTACGTGCAT	Zea mays
Zm00001d012553	bZIP transcription factor family	Zm00001d029744	252	271	-	9.32e-07	AGTGACGTCACCACCCCTCC	Zea mays
Zm00001d012553	bZIP transcription factor family	Zm00001d039963	331	350	-	2.96e-07	GATGACGTCATCTTCCGATG	Zea mays
Zm00001d037854	WRKY55	Zm00001d018627	399	410	+	1.21e-06	AGCGTTGACTTG	Zea mays
Zm00001d037854	WRKY55	Zm00001d040777	411	422	+	3.91e-06	GACGTTGACTTC	Zea mays
Zm00001d037854	WRKY55	Zm00001d045210	162	173	-	9.73e-07	GGCGTTGACTTG	Zea mays
Zm00001d037854	WRKY55	Zm00001d045211	312	323	+	3.91e-06	GACGTTGACTTC	Zea mays
Zm00001d002143	bZIP transcription factor family	Zm00001d029744	257	271	+	1.11e-06	GGTGGTGACGTCACT	Zea mays
Zm00001d002143	bZIP transcription factor family	Zm00001d039963	336	350	+	5.82e-08	GAAGATGACGTCATC	Zea mays
Zm00001d011771	C2C2(Zn) GATA transcription factor family	Zm00001d000298	130	156	+	1.83e-06	ATTTATCATCATCAATATAAACATAAA	Zea mays
Zm00001d011771	C2C2(Zn) GATA transcription factor family	Zm00001d011886	286	312	+	5.4e-06	CATTTTCATGAGCTCCGATATGATGAA	Zea mays
Zm00001d011771	C2C2(Zn) GATA transcription factor family	Zm00001d012024	47	73	-	8.96e-06	CGTGATGATCACCGTCCTGTCGTCCAT	Zea mays
Zm00001d011771	C2C2(Zn) GATA transcription factor family	Zm00001d048644	27	53	-	6.22e-06	TATCAGCATCATCATCATCACCATTTG	Zea mays
Zm00001d011771	C2C2(Zn) GATA transcription factor family	Zm00001d053055	281	307	-	2.72e-06	ACTCACCATCATGTTCCTCACATCCTT	Zea mays
Zm00001d050583	Trihelix, Triple-Helix transcription factor family	Zm00001d009939	60	77	-	3.1e-06	TAAGATAAAGACCCTTAT	Zea mays
Zm00001d050583	Trihelix, Triple-Helix transcription factor family	Zm00001d011315	314	331	+	8.94e-06	TCTACCTAGTGCCCTAAA	Zea mays
Zm00001d050583	Trihelix, Triple-Helix transcription factor family	Zm00001d022437	37	54	-	5.83e-06	AATCAAACAGACCCTTAA	Zea mays
Zm00001d050583	Trihelix, Triple-Helix transcription factor family	Zm00001d031157	317	334	-	6.38e-06	TGACAAAATTACCCTTGA	Zea mays
Zm00001d050583	Trihelix, Triple-Helix transcription factor family	Zm00001d042099	21	38	+	3.15e-06	AAAATAAACAACCCTTAA	Zea mays
Zm00001d050583	Trihelix, Triple-Helix transcription factor family	Zm00001d052989	63	80	-	4.76e-06	AATAAAATATGCCCTTCA	Zea mays
Zm00001d039506	NAC domain transcription factor family	Zm00001d003356	60	74	+	4.26e-06	GGCTTGTAGCTGAAG	Zea mays
Zm00001d039506	NAC domain transcription factor family	Zm00001d029648	57	71	-	3.89e-06	TACGTGTAGAAGAAG	Zea mays
Zm00001d039506	NAC domain transcription factor family	Zm00001d043988	2	16	-	5.72e-06	ATCGTGACGGTGAAG	Zea mays
Zm00001d021537	MYB67	Zm00001d006536	11	31	+	1.54e-06	TGTAGTATATAGTTAGGTAGA	Zea mays
Zm00001d021537	MYB67	Zm00001d010284	411	431	-	9.06e-06	ACGGTGGAGATGGTTGGTGGT	Zea mays
Zm00001d021537	MYB67	Zm00001d047192	271	291	+	6.18e-06	GGATGCAATTTGTTTGGTGGA	Zea mays
Zm00001d021537	MYB67	Zm00001d048329	339	359	+	8.29e-06	TTTTGGTTTGTGGTAGGTGTA	Zea mays
Zm00001d021537	MYB67	Zm00001d053055	316	336	-	4.05e-06	GTAGTTGGTCCGGTAGGTGGA	Zea mays
Zm00001d036435	AS2,Lateral Organ Boundaries Gene Family	Zm00001d011625	171	185	+	6.5e-06	CCGTAAAATCCGGAG	Zea mays
Zm00001d036435	AS2,Lateral Organ Boundaries Gene Family	Zm00001d029648	399	413	-	2.75e-06	CCGGATATATCGGAG	Zea mays
Zm00001d036435	AS2,Lateral Organ Boundaries Gene Family	Zm00001d048329	447	461	-	4.31e-06	GCGACAAAGGCGGTG	Zea mays
Zm00001d005750	bHLH,Basic Helix-Loop-Helix family	Zm00001d002434	340	349	+	5.83e-06	TGCACGTGCA	Zea mays
Zm00001d005750	bHLH,Basic Helix-Loop-Helix family	Zm00001d031221	232	241	+	9e-06	AGCACGTGCA	Zea mays
Zm00001d051328	WRKY domain transcription factor family	Zm00001d007363	380	389	-	2.42e-06	TCGTTGACCG	Zea mays
Zm00001d051328	WRKY domain transcription factor family	Zm00001d021647	366	375	-	2.42e-06	TCGTTGACCG	Zea mays
Zm00001d051328	WRKY domain transcription factor family	Zm00001d049028	161	170	-	4.01e-06	CCGTTGACCA	Zea mays
Zm00001d017986	E2F/DP transcription factor family	Zm00001d023843	430	450	+	6.03e-06	CCTGCCACTTTCCCGCCATCT	Zea mays
Zm00001d017986	E2F/DP transcription factor family	Zm00001d031158	44	64	+	1.47e-06	TTAACAAATTTCCCGAGAAAA	Zea mays
Zm00001d017986	E2F/DP transcription factor family	Zm00001d036550	237	257	+	4.46e-06	ATGAATGTATTCCCGCAAAAT	Zea mays
Zm00001d017986	E2F/DP transcription factor family	Zm00001d043947	3	23	+	1.98e-06	CGCCAAAGTTTCCCGCCCGAA	Zea mays
Zm00001d021947	WRKY20	Zm00001d021647	364	376	-	5.53e-06	GTCGTTGACCGTT	Zea mays
Zm00001d021947	WRKY20	Zm00001d041082	210	222	-	4.97e-06	AACGTTGACTGAT	Zea mays
Zm00001d021947	WRKY20	Zm00001d045210	161	173	-	6.71e-06	GGCGTTGACTTGG	Zea mays
Zm00001d027395	NAC domain transcription factor family	Zm00001d003356	59	74	-	2.66e-06	CTTCAGCTACAAGCCA	Zea mays
Zm00001d027395	NAC domain transcription factor family	Zm00001d024996	410	425	-	3.88e-06	CTTGTACAAGAAGCAA	Zea mays
Zm00001d027395	NAC domain transcription factor family	Zm00001d029648	57	72	+	5.52e-08	CTTCTTCTACACGTAA	Zea mays
Zm00001d027395	NAC domain transcription factor family	Zm00001d042099	410	425	-	2.99e-06	CTTCCTCTGCAAGAAA	Zea mays
Zm00001d009595	WRKY6	Zm00001d041082	210	230	-	2.82e-06	CTGGCCATAACGTTGACTGAT	Zea mays
Zm00001d009595	WRKY6	Zm00001d045210	161	181	-	5e-06	ATAACAGTGGCGTTGACTTGG	Zea mays
Zm00001d017712	WRKY14	Zm00001d018627	399	411	-	7.89e-06	GCAAGTCAACGCT	Zea mays
Zm00001d017712	WRKY14	Zm00001d040777	411	423	-	9.1e-06	TGAAGTCAACGTC	Zea mays
Zm00001d017712	WRKY14	Zm00001d045210	161	173	+	6.05e-06	CCAAGTCAACGCC	Zea mays
Zm00001d017712	WRKY14	Zm00001d045211	312	324	-	9.1e-06	TGAAGTCAACGTC	Zea mays
