# Supplementary material for: Multi-Omics Analyses Reveal the Regulatory Network and the Function of ZmUGTs in Maize Defense Response
Source: Front Plant Sci. 2021 Sep 24;12:738261. doi: 10.3389/fpls.2021.738261 (PMC8497902; doi:10.3389/fpls.2021.738261)
Supplement: Supplementary file 5 [file Table_4.XLSX]

## Sheet: S4
Supplementary Table S4. Expression profiles of genes involved in PTI signaling pathway, SA biosynthesis and signaling. Expression levels are given as log2(Fold-Change) in gene expression in the Rp1-D21 mutant compared with the wild type at 6 h, and 48 h post temperature shift, and at constant 22 ℃.
	Mo17×H95-6 hpts							Mo17×H95-48 hpts						Mo17×H95-22 ℃						B73×H95-6 hpts						B73×H95-48 hpts						B73×H95-22 ℃
Gene name	Gene-id	WT1	WT2	Rp1-D21(mt1)	Rp1-D21(mt2)	log2FC	FDR	WT1	WT2	Rp1-D21(mt1)	Rp1-D21(mt2)	log2FC	FDR	WT1	WT2	Rp1-D21(mt1)	Rp1-D21(mt2)	log2FC	FDR	WT1	WT2	Rp1-D21(mt1)	Rp1-D21(mt2)	log2FC	FDR	WT1	WT2	Rp1-D21(mt1)	Rp1-D21(mt2)	log2FC	FDR	WT1	WT2	Rp1-D21(mt1)	Rp1-D21(mt2)	log2FC	FDR
FLS2	Zm00001d011643	21.7384	11.5628	23.54	5.64849	-0.189077	1	1.78081	5.52971	13.2438	26.5212	2.36089	0.725281	14.3492	17.2154	340.621	315.751	4.37223	1.71e-11	9.69778	5.48269	2.72175	5.1581	-0.930753	1	3.0118	7.99791	47.3147	60.0597	3.26683	0.00732506	12.4584	7.0092	275.291	214.483	4.6365	9.08e-11
FLS2	Zm00001d023554	18.5043	13.3898	26.8519	19.0155	0.521362	1	4.66032	7.01586	9.71453	25.1299	1.55298	1	36.9029	66.1034	721.348	767.852	3.85822	1.02e-13	7.78762	0.0565153	12.0321	4.1685	1.01087	1	4.0106	0.0589989	13.7236	3.07373	1.94814	1	4.65869	10.2668	120.828	185.834	4.33946	7.39e-08
FLS2	Zm00001d002287	28.1786	5.21941	11.7795	5.67801	-0.927191	1	9.16189	13.2247	19.0889	24.1709	0.936214	1	11.2776	14.5351	51.328	47.9969	1.93785	0.052059	1.93239	2.17584	19.4037	7.27608	2.63142	0.993137	ns	ns	ns	ns	ns	ns	2.22492	0.034668	4.71876	1.97078	1.4641	0.579025
BAK1	Zm00001d007363	24.8715	1.63497	6.38335	0.915781	-1.83137	1	3.0844	3.87877	318.47	303.852	6.41558	8.69e-16	9.22187	9.32209	4670.54	11444	9.74675	4.53e-46	2.87897	8.6188	3.6072	10.3091	0.271132	1	3.00794	0.0468022	316.697	119.139	6.99445	6.11e-10	11.2338	2.45743	2577.18	1626.95	8.23292	1.12e-33
BAK1	Zm00001d025580	4.37029	4.47246	4.33935	7.63455	0.428871	1	2.29112	54.0006	3.84372	26.7963	-0.875323	1	9.21003	5.48765	55.0693	47.9711	2.7848	0.00573452	6.77624	6.5275	5.55998	2.08848	-0.771363	1	4.01797	35.5254	9.91076	44.7602	0.462875	1	5.68726	4.64272	42.1033	89.9622	3.64711	0.000209483
BAK1	Zm00001d029597	486.298	621.814	355.986	548.429	-0.292882	1	531.58	619.15	736.855	937.356	0.540681	1	495.812	502.108	3502.27	4043.23	2.91843	5.65e-14	452.152	662.517	510.353	558.333	-0.060536	1	503.61	833.043	1220.95	1291.91	0.910893	1	405.607	352.518	2867.57	2935.64	2.93597	1.76e-10
BAK1	Zm00001d024430	1354.1	1345.68	1161.34	1225.32	-0.177803	1	562.98	776.319	651.198	617.973	-0.0787924	1	1271.3	1770.4	542.143	736.456	-1.24954	0.00540711	1056.36	1174.17	914.984	944.004	-0.262799	1	744.378	1073.77	723.324	1107.63	0.010085	1	1272.7	1075.88	518.825	459.617	-1.26277	0.00737098
BAK1	Zm00001d018344	70.8187	49.2079	90.2346	41.8335	0.137524	1	36.5645	13.6527	34.3092	18.7597	0.0839622	1	103.449	70.6455	32.6602	31.4706	-1.43748	0.111312	73.6577	18.6274	74.5758	39.3295	0.302438	1	34.1074	23.2381	25.4281	19.351	-0.354485	1	46.8144	67.8711	12.9079	23.7315	-1.64264	0.0945581
BAK1	Zm00001d034257	895.223	2060.79	516.283	1806.19	-0.347938	1	640.16	677.926	634.557	595.321	-0.100267	1	765.238	931.02	243.6	178.629	-2.00603	1.2e-05	718.409	1375.01	801.76	1811.44	0.319924	1	1321.21	877.265	906.266	709.592	-0.444147	1	478.705	814.203	127.093	153.21	-2.20518	1.76e-05
RLCK-VII	Zm00001d029468	2.16354	0.864176	0.0158693	1.92008	-0.542164	1	0.0431154	0.784812	1.23928	2.21872	1.62292	1	1.02775	1.33656	24.1486	79.9483	5.34342	0.00013017	0	3.20295	0	7.19174	1.10734	1	0.000753038	2.2482	15.387	5.1084	3.08909	0.499824	3.37216	1.21598	48.607	41.5101	4.22766	6.69e-05
RLCK-VII	Zm00001d032069	30.5626	37.6534	15.1525	41.9569	-0.254582	1	10.4009	9.24221	20.3235	30.8182	1.37855	1	29.718	37.1001	683.029	1161.03	4.7862	2.64e-19	30.0228	25.0147	41.386	38.2639	0.531069	1	32.1015	24.3732	116.164	40.7487	1.4708	1	42.3104	79.3195	1029.25	708.696	3.83472	4.28e-13
RLCK-VII	Zm00001d021303	8.76355	12.575	14.9828	5.66733	-0.0500136	1	7.22494	3.75337	26.0043	14.3941	1.87887	1	15.3376	4.34616	250.149	162.045	4.35306	1.87e-07	4.83117	6.5028	7.36265	6.21196	0.259055	1	6.02223	16.0505	41.6274	18.3449	1.43684	1	2.26134	1.19264	134.143	124.54	6.13606	8.87e-11
RLCK-VII	Zm00001d026126	4.40199	7.19942	9.57875	0.905588	-0.146229	1	3.40753	11.0235	12.0104	19.8689	1.10438	1	5.1385	10.4248	76.447	140.408	3.79072	4.26e-05	2.89009	5.40108	2.73349	4.13021	-0.261541	1	7.02381	10.3679	22.0728	14.2638	1.05847	1	2.43061	12.4753	135.991	61.2668	3.70257	0.000184071
RLCK-VII	Zm00001d027892	42.4919	33.1018	64.3761	17.0592	0.106662	1	19.3093	16.9708	46.51	78.3747	1.78302	0.759865	157.69	25.9483	1464.22	1064.59	3.77701	3.06e-07	66.8418	37.0225	69.0541	37.2601	0.0335904	1	74.2373	75.2267	273.375	198.531	1.65761	0.156388	23.0512	95.2636	1225.04	859.927	4.13628	5.33e-10
RLCK-VII	Zm00001d020631	19.6576	24.2113	23.6593	22.8434	0.0827466	1	2.95941	2.27909	5.95471	5.81682	1.15304	1	14.3593	23.701	31.5806	189.612	2.53127	0.0266632	19.3096	66.0857	18.3549	23.7704	-1.01487	1	4.01496	9.16137	5.00521	8.13832	-0.00018924	1	9.12856	9.22578	120.172	139.371	3.80565	8.34e-07
RLCK-VII	Zm00001d032857	21.8	19.6875	27.9003	15.1929	0.053621	1	33.4633	9.7514	13.3235	39.8262	0.301324	1	60.4229	38.7837	168.868	222.97	1.97704	0.0061714	39.7533	12.082	31.2744	27.926	0.189529	1	13.0403	8.18535	48.19	53.9551	2.25061	0.124786	20.5955	29.8743	345.684	155.167	3.30594	4.6e-06
RLCK-VII	Zm00001d005036	950.702	929.066	1093.58	1061.56	0.197205	1	1134.18	986.625	941.129	846.6	-0.246305	1	922.973	710.822	360.233	299.957	-1.30756	0.00552815	743.627	700.614	698.824	1023.59	0.253854	1	1346.29	833.309	927.41	749.295	-0.378439	1	475.231	643.8	172.586	201.643	-1.58005	0.00182352
RLCK-VII	Zm00001d045191	437.14	309.024	468.761	271.293	-0.0118599	1	352.503	245.937	325.466	210.17	-0.159586	1	1671.79	839.904	327.52	402.498	-1.78253	0.00026115	756.25	418.29	707.337	239.943	-0.309985	1	581.853	262.884	544.306	208.727	-0.165589	1	589.229	1004.26	227.148	403.292	-1.33831	0.0199321
CA	Zm00001d038576	588.794	816.246	716.123	566.46	-0.132039	1	537.289	473.546	699.939	704.934	0.475468	1	876.857	466.627	5898.8	3766.57	2.84571	1.68e-09	1687.66	2410.21	1262.56	1611.92	-0.511527	1	1347.3	2867.3	1768.27	3085.7	0.203785	1	781.624	699.214	3230.68	3090.82	2.0937	6.35e-06
CA	Zm00001d052457	686.827	548.258	693.535	524.565	-0.019923	1	914.063	982.068	1310.76	1421.61	0.526981	1	1244.63	903.459	6555.75	4819.55	2.40424	8.05e-09	804.639	636.559	668.54	659.669	-0.117904	1	608.946	841.194	1161.72	1192.14	0.698967	1	804.389	663.531	3589.93	3243.04	2.21859	2.13e-06
CA	Zm00001d030893	1110.97	1065.24	1091.42	979.671	-0.0714433	1	891.847	1090.47	1151.57	1425.33	0.378236	1	1104.3	1042.76	2958.22	3120.99	1.50137	0.000169178	1278.1	1351.22	883.691	1073.24	-0.426122	1	711.272	906.019	992.46	1170.76	0.419624	1	1164.5	1172.59	1886.33	1694.17	0.615464	0.311906
ROS(RBOHA/D)	Zm00001d043543	971.409	907.555	868.855	916.848	-0.0733421	1	1495.37	725.619	1364.16	1200.89	0.20865	1	1081.77	1056.02	2413.23	2568.94	1.22057	0.00287446	764.949	532.306	930.622	933.666	0.522826	1	1639.23	930.532	1583.2	1140.23	0.0837301	1	823.777	723.409	1931.69	2238.8	1.43039	0.00327687
ROS(RBOHA/D)	Zm00001d052653	682.612	1425.56	462.51	1453.91	-0.13755	1	384.059	373.755	441.981	339.546	0.0437208	1	708.863	442.632	1219.66	1407.36	1.18886	0.0103639	555.748	923.181	796.302	1153.87	0.399112	1	742.365	346.196	643.258	298.312	-0.209133	1	229.307	848.549	568.937	498.166	-0.0143974	1
MAPKKK(MEKK1)	Zm00001d013477	98.234	205.295	122.635	174.256	-0.0325459	1	134.279	186.618	161.771	255.881	0.37928	1	229.457	182.145	476.887	384.209	1.06351	0.0643635	144.288	106.504	173.804	166.473	0.43946	1	184.588	136.638	282.761	152.727	0.439081	1	90.1656	161.102	214.988	248.099	0.88139	0.259626
MAPKK(MKK4/5)	Zm00001d045064	130.695	51.8162	53.7703	53.3115	-0.766952	1	35.9318	44.9439	60.5717	51.7775	0.46907	1	149.565	151.443	311.671	339.444	1.11281	0.0710915	66.8468	33.7746	133.39	94.1153	1.17407	1	78.249	64.8621	120.288	67.2089	0.389886	1	51.4929	135.663	188.873	175.938	0.962142	0.282531
MAPK(MPK3)	Zm00001d028711	220.197	171.068	337.499	105.598	0.179043	1	126.691	147.077	204.521	291.628	0.85718	1	431.249	258.022	2562.61	1721.37	2.63379	6.29e-09	321.465	298.724	413.914	223.377	0.0396797	1	624.996	757.913	1020.43	998.712	0.546131	1	191.644	474.304	2067.45	1972.91	2.60061	2.6e-06
MAPK(MPK6)	Zm00001d047349	1992.94	1512.27	1930.14	1545.19	-0.0122916	1	1857.71	1815.5	2865.07	2965.18	0.666534	1	1902.31	1779.96	10576.9	9874.82	2.47342	1.18e-10	1394.3	1364.27	1263.49	1464.08	-0.0163586	1	1341.28	2049.26	4068.26	3337.18	1.12714	0.498532	1275.03	1316.56	9248.96	6157.92	2.5716	1.48e-07
MAPK(MPK3)	Zm00001d047758	1055.39	1205.04	893.592	973.976	-0.275458	1	947.314	1937.31	1514.18	3357.85	0.755794	1	1708.69	1436.01	5192.28	6205.81	1.85759	3.78e-06	1113.5	1040.6	1218.49	1021.57	0.0564907	1	1139.64	2028.39	2457.94	3176.32	0.830687	1	1142.91	1422.47	4059.46	3072.04	1.47502	0.00360043
NPR1	Zm00001d039469	119.877	83.2503	92.3924	45.6453	-0.556856	1	126.799	168.025	174.857	290.24	0.65676	1	261.185	114.711	347.174	276.313	0.727633	0.366686	168.534	64.2295	204.318	66.2368	0.216777	1	185.591	138.95	355.488	225.005	0.838464	1	224.491	236.126	274.512	217.449	0.0955665	0.954086
NPR4	Zm00001d012660	2147.81	2294.48	2266.72	2020.29	-0.0513839	1	2042.69	552.129	3309.33	2100.75	1.06051	1	3751.33	2300.91	6479.2	5774.12	1.0174	0.032785	2675.35	1457.78	2776.31	1975.92	0.201309	1	1830.84	945.596	4109.86	2029	1.14461	0.819121	2011.14	2434.95	4501.13	3689.81	0.881502	0.124869
WRKY70	Zm00001d005057	ns	ns	ns	ns	ns	ns	4.16e-17	4.16e-17	3.49851	1.34706	4.37958	1	1.39e-17	1.39e-17	12.1281	11.7876	6.62121	0.00320114	ns	ns	ns	ns	ns	ns	0	0	7.7711	1.03343	5.19266	0.935558	5.55e-17	5.55e-17	7.65501	8.89669	6.09059	0.00908141
PR1	Zm00001d018738	155.585	3.37545	36.383	3.72739	-1.978	1	46.7345	12.0326	1120.84	2522.87	5.97516	4.04e-13	74.8089	139.11	72894.9	62131.5	9.30596	1e-61	37.7206	80.2646	54.2075	72.3613	0.10174	1	48.1461	4.89849	2503.93	1097.48	6.07228	8.02e-10	80.7647	45.0782	27824.4	16567.1	8.45962	4.28e-37
PR5	Zm00001d031158	743.286	104.594	414.954	174.161	-0.524994	1	268.553	90.9523	1722.18	4859.91	4.19693	5.35e-07	467.149	743.554	105534	104441	7.43891	4.35e-51	141.35	175.933	201.334	276.047	0.589039	1	175.56	147.022	7977.5	4713.6	5.29664	1.49e-17	996.653	256.024	103568	58657.5	7.01648	1.19e-18
