# Supplementary material for: Multi-Omics Analyses Reveal the Regulatory Network and the Function of ZmUGTs in Maize Defense Response
Source: Front Plant Sci. 2021 Sep 24;12:738261. doi: 10.3389/fpls.2021.738261 (PMC8497902; doi:10.3389/fpls.2021.738261)
Supplement: Supplementary file 6 [file Table_5.XLSX]

## Sheet: Sheet1
Supplementary Table S5. The differential accumulated metabolites in the Rp1-D21 mutant compared with the wild type.
Compounds	Class I	Kegg_pathway	ko_id	CAS	Level	VIP	Fold_Change	Log2FC	Type
13-KODE(13-keto-9Z,11E-octadecadienoic acid)	Lipid	alpha-Linolenic acid metabolism	ko00592	54739-30-9	A	1.28051	6.26214	2.64665	up
9,12,13-trihyroxy-10，15-octadecadienoic acid	Lipid			-	A	1.25495	5.98132	2.58046	up
9S-hyroxy-10E,12E-octadecadienoic acid	Lipid			-	B	1.39499	5.36132	2.42259	up
13-Hydroxy-9,11-octadecadienoic acid	Lipid			5204-88-6	A	1.39567	5.31418	2.40985	up
Punicic acid	Lipid			-	B	1.43285	4.86759	2.28321	up
9,10-EOT(9,10-epoxyoctadecenoic acid)	Lipid	alpha-Linolenic acid metabolism	ko00592	16833-56-0	B	1.41945	4.83162	2.27251	up
9-HOT(9-hydroxyoctadecatrienoic)	Lipid	alpha-Linolenic acid metabolism	ko00592	89886-42-0	A	1.1957	4.41035	2.14089	up
Eicosadienoic acid	Lipid	Biosynthesis of unsaturated fatty acids	ko01040	-	B	1.37768	2.31352	1.21009	up
cis-10-Heptadecenoic Acid	Lipid			29743-97-3	A	1.3658	2.10777	1.07571	up
α-Linolenic Acid	Lipid	alpha-Linolenic acid metabolism	ko00592	463-40-1	B	1.22856	1.9311	0.949423	up
γ-Linolenic Acid	Lipid			506-26-3	A	1.21726	1.50623	0.590939	up
2，3-dihydroxypropyl-9，12-octadecadienoate-hexose-hexose	Lipid			-	A	1.47358	0.402444	-1.31314	down
LysoPC 18:3 (2n isomer)	Lipid	Linoleic acid metabolism	ko00591	-	A	1.41753	5.93514	2.56928	up
isoPC(18：2)	Lipid			-	A	1.48502	5.13135	2.35934	up
1-Stearoyl-sn-glycero-3-phosphocholine	Lipid			19420-57-6	B	1.60303	3.48541	1.80133	up
LPC(18:0)	Lipid			-	A	1.59719	3.27722	1.71247	up
LPC(16:2)	Lipid			-	A	1.4189	3.06059	1.61381	up
LPC(18:2)	Lipid			-	B	1.43401	2.68132	1.42294	up
LysoPC 14:0 (2n isomer)	Lipid	Glycerophospholipid metabolism	ko00564	-	A	1.42846	1.77641	0.828961	up
LysoPC 15:0	Lipid			-	A	1.57847	1.75604	0.812325	up
LysoPE 18:1 (2n isomer)	Lipid	Glycosylphosphatidylinositol (GPI)-anchor biosynthesis	ko00563	-	A	1.42485	2.25893	1.17564	up
LysoPE 16:0 (2n isomer)	Lipid			-	A	1.06756	1.58988	0.668919	up
LysoPE 18:2 (2n isomer)	Lipid			-	A	1.0293	1.51081	0.595322	up
PC(18：2)	Lipid	Glycosylphosphatidylinositol (GPI)-anchor biosynthesis	ko00563	-	B	1.43281	2.90074	1.53642	up
4-Hydroxysphinganine	Lipid	Sphingolipid metabolism	ko00600	-	B	1.52321	3.40295	1.76679	up
3-O-p-Coumaroyl quinic acid	Phenolic acids	Phenylpropanoid biosynthesis	ko00940	-	B	1.63008	13.0401	3.70489	up
3-O-(E)-p-coumaroyl quinic acid	Phenolic acids			-	B	1.61591	12.7004	3.6668	up
2,5-dihydroxy benzoic acid O-hexoside	Phenolic acids			-	A	1.65629	8.33552	3.05927	up
Protocatechuic acid-4-glucoside	Phenolic acids			-	A	1.65502	7.69716	2.94433	up
Chlorogenic acid methyl ester	Phenolic acids			29708-87-0	B	1.59157	7.02725	2.81296	up
Trans-3-O-p-coumaric quinic acid	Phenolic acids			-	B	1.55466	6.23049	2.63935	up
Glyceryl 1,3-diferulate	Phenolic acids			83008-46-2	A	1.61803	3.69792	1.88671	up
1-O-feruloyl-3-O-p-coumaroyl glycerol	Phenolic acids			-	A	1.58646	2.90885	1.54045	up
Coniferin	Phenolic acids	Phenylpropanoid biosynthesis	ko00940	531-29-3	A	1.5736	2.67329	1.41862	up
3-O-Feruloyl quinic acid glucoside	Phenolic acids	Phenylpropanoid biosynthesis	ko00940	-	A	1.48727	2.50625	1.32553	up
2-Feruloyl-sn-glycerol	Phenolic acids			-	A	1.45455	2.29582	1.19901	up
1-feruloyl-sn-glycerol	Phenolic acids			-	B	1.57258	2.12507	1.08751	up
Trihydroxycinnamoylquinic acid	Phenolic acids			-	A	1.5367	2.08736	1.06168	up
Isochlorogenic acid A	Phenolic acids			2450-53-5	A	1.26086	1.96647	0.975608	up
3,4,5-trimethoxyphenyl-β-D-Glucopyranoside	Phenolic acids			-	B	1.39127	1.79928	0.847422	up
Sinapic acid	Phenolic acids	Phenylpropanoid biosynthesis	ko00940	530-59-6	A	1.5576	0.439017	-1.18765	down
Peonidin	Flavonoids			134-01-0	B	1.19263	0.618457	-0.693254	down
Naringenin chalcone	Flavonoids	Flavonoid biosynthesis	ko00941	25515-46-2	B	1.22298	2.01188	1.00855	up
Eriodictiol C-hexosyl-O-hexoside	Flavonoids	Flavonoid biosynthesis	ko00941	-	B	1.55006	0.564578	-0.824754	down
Catechin gallate，CG	Flavonoids			032-18471	B	1.49372	4.26738	2.09335	up
ladanein	Flavonoids			-	A	1.59195	3.5742	1.83762	up
Tricin 7-O-hexoside	Flavonoids	Flavonoid biosynthesis	ko00941	-	A	1.05822	1.9685	0.977094	up
Tricin 7-O-feruloylhexoside	Flavonoids	Flavonoid biosynthesis	ko00941	-	B	1.19099	1.68896	0.756138	up
Diosmetin-7-O-galactoside	Flavonoids			-	B	1.24119	1.5411	0.623957	up
Diosmetin	Flavonoids			520-34-3	A	1.40722	0.648971	-0.623774	down
Hispidulin	Flavonoids			1447-88-7	A	1.46344	0.618427	-0.693325	down
Luteolin‐6,8‐di‐C‐glucoside	Flavonoids			-	B	1.56941	0.552989	-0.854677	down
Luteolin-7,3'-Di-O-Beta-D-Glucoside	Flavonoids			-	B	1.63237	0.533436	-0.906612	down
6-C-hexosyl-luteolin O-hexoside	Flavonoids	Flavonoid biosynthesis	ko00941	-	A	1.63934	0.521505	-0.939246	down
Di-O-methylquercetin	Flavonoids			-	A	1.36908	3.9098	1.96709	up
Kaempferol 7-O-glucosdie	Flavonoids			16290-07-6	B	1.30867	0.584301	-0.775216	down
lumichrome	Alkaloids	Riboflavin metabolism	ko00740	1086-80-2	A	1.50392	1.81436	0.859458	up
N-benzylmethylene isomethylamine	Alkaloids			-	A	1.31414	1.56522	0.646363	up
3-hydroxypropyl palmitate glc-glucosamine	Alkaloids			-	A	1.41865	0.483421	-1.04865	down
methoxy-N-Caffeoyltyramine	Alkaloids			-	B	1.59969	2.95714	1.5642	up
N-cis-feruloyltyramine	Alkaloids			-	B	1.60673	2.91395	1.54298	up
N-Feruloyltyramine	Alkaloids			66648-43-9	B	1.60564	2.91098	1.5415	up
N-cis-sinapoyltyramine	Alkaloids			-	B	1.32388	2.90643	1.53925	up
N-trans-feruloyltyramine	Alkaloids			-	A	1.59776	2.70986	1.43822	up
N-Z-p-coumaroyl-tyramine	Alkaloids			-	A	1.13035	2.36352	1.24094	up
serotonin	Alkaloids	Tryptophan metabolism	ko00380	50-67-9	B	1.51592	4	2	up
Tryptamine	Alkaloids	Tryptophan metabolism	ko00380	61-54-1	A	1.5066	2.27273	1.18442	up
Nα-Acetyl-L-arginine	Amino Acid And Its Derivatives	Arginine biosynthesis	ko00220	155-84-0	B	1.35383	1.81156	0.857229	up
L-(+)-Arginine	Amino Acid And Its Derivatives	Arginine biosynthesis	ko00220	74-79-3	A	1.34546	1.77039	0.824069	up
L-Phenylalanine	Amino Acid And Its Derivatives	Phenylpropanoid biosynthesis	ko00940	63-91-2	A	1.40724	1.57389	0.654336	up
D-(+)-Phenylalanine	Amino Acid And Its Derivatives	Phenylalanine metabolism	ko00360	673-06-3	B	1.36641	1.56115	0.64261	up
phenylalanine	Amino Acid And Its Derivatives	Phenylpropanoid biosynthesis	ko00940	63-91-2	B	1.44284	1.53295	0.616307	up
Glutamic acid	Amino Acid And Its Derivatives			617-65-2	B	1.31152	0.650485	-0.620411	down
L-Glutamic acid	Amino Acid And Its Derivatives	Arginine and proline metabolism	ko00330	56-86-0	A	1.38237	0.606299	-0.721898	down
L-Citrulline	Amino Acid And Its Derivatives	Biosynthesis of amino acids	ko01230	372-75-8	B	1.36019	0.577201	-0.792855	down
L-Methionine	Amino Acid And Its Derivatives	Cysteine and methionine metabolism	ko00270	63-68-3	B	1.26608	0.481173	-1.05537	down
Proline	Amino Acid And Its Derivatives			609-36-9	B	1.41117	0.434021	-1.20416	down
L-Proline	Amino Acid And Its Derivatives	Arginine and proline metabolism	ko00330	147-85-3	B	1.41114	0.431593	-1.21226	down
Esculin Hydrate	Lignans and Coumarins			66778-17-4	A	1.37595	2.32394	1.21658	up
Esculin (6,7-DihydroxyCoumarin-6-glucoside)	Lignans and Coumarins			531-75-9	A	1.30794	2.17005	1.11773	up
Skimmin	Lignans and Coumarins			93-39-0	A	1.03753	2.02387	1.01712	up
Syringaresinol	Lignans and Coumarins			21453-69-0	A	1.57028	2.78151	1.47587	up
Uridine 5'-diphospho-D-glucose	Nucleotide and its derivates	Starch and sucrose metabolism	ko00500	133-89-1	A	1.25801	1.80189	0.849512	up
β-Nicotinamide mononucleotide	Nucleotide and its derivates	Nicotinate and nicotinamide metabolism	ko00760	1094-61-7	B	1.55967	1.5339	0.617203	up
9-（β-D-Arabinofuranosyl)hypoxanthine	Nucleotide and its derivates			7013-16-3	B	1.13661	0.428408	-1.22294	down
N6-Succinyl Adenosine	Nucleotide and its derivates	Purine metabolism	ko00230	4542-23-8	B	1.64036	0.424049	-1.2377	down
kinic acid	Organic acids	Phenylalanine, tyrosine and tryptophan biosynthesis	ko00400	77-95-2	A	1.44571	1.80915	0.855308	up
Azelaic Acid	Organic acids			123-99-9	A	1.24235	1.80049	0.848392	up
Citric Acid	Organic acids	Biosynthesis of secondary metabolites	ko01110	77-92-9	A	1.50126	1.69564	0.761828	up
trans,trans-Muconic acid	Organic acids			3588-17-8	B	1.05602	0.435182	-1.20031	down
D-Glucose 6-phosphate	Others	Starch and sucrose metabolism	ko00500	56-73-5	A	1.60995	2.53114	1.33978	up
glucose-1-phosphate	Others			59-56-3	A	1.60427	2.47991	1.31029	up
D(+)-Glucose	Others	Starch and sucrose metabolism	ko00500	50-99-7	A	1.36766	0.665957	-0.586498	down
Turanose	Others			547-25-1	A	1.57333	0.605056	-0.724859	down
D-Glucose	Others			14431-43-7	B	1.57787	0.558929	-0.839264	down
Fructose	Others			7660-25-5	B	1.54458	0.514749	-0.958058	down
Octadecenoic amide	Others			-	A	1.38764	2.00485	1.00349	up
Phytosphingosine	Others			-	A	1.42554	1.5773	0.657462	up
2-Decanol	Others			4773-96-0	A	1.33297	0.611018	-0.710712	down
D-Glucurono-6,3-lactone	Others			32449-92-6	B	1.18299	0.485446	-1.04262	down
D-PANTOTHENIC ACID	Others	Biosynthesis of secondary metabolites	ko01110	79-83-4	A	1.57714	1.89873	0.925038	up
Pyridoxine	Others	Vitamin B6 metabolism	ko00750	65-23-6	B	1.63115	0.612527	-0.707156	down
Isomangiferin	Others			24699-16-9	B	1.567	2.22934	1.15662	up
