# Supplementary material for: Multi-Omics Analyses Reveal the Regulatory Network and the Function of ZmUGTs in Maize Defense Response
Source: Front Plant Sci. 2021 Sep 24;12:738261. doi: 10.3389/fpls.2021.738261 (PMC8497902; doi:10.3389/fpls.2021.738261)
Supplement: Supplementary file 7 [file Table_6.XLSX]

## Sheet: S6
Supplementary Table S6. Expression profiles of genes involved in SA biosynthesis and and modification pathway. Expression levels are given as log2(Fold-Change) in gene expression in the Rp1-D21 mutant as compared with the wild type at 6 h and 48 h post temperature shift, and at constant 22 ℃.
	Mo17×H95-6 hpts							Mo17×H95-48 hpts						Mo17×H95-22 ℃						B73×H95-6 hpts						B73×H95-48 hpts						B73×H95-22 ℃
Gene name	Gene-id	WT1	WT2	Rp1-D21(mt1)	Rp1-D21(mt2)	log2FC	FDR	WT1	WT2	Rp1-D21(mt1)	Rp1-D21(mt2)	log2FC	FDR	WT1	WT2	Rp1-D21(mt1)	Rp1-D21(mt2)	log2FC	FDR	WT1	WT2	Rp1-D21(mt1)	Rp1-D21(mt2)	log2FC	FDR	WT1	WT2	Rp1-D21(mt1)	Rp1-D21(mt2)	log2FC	FDR	WT1	WT2	Rp1-D21(mt1)	Rp1-D21(mt2)	log2FC	FDR
ICS1	Zm00001d020220	1579.82	2081.29	1804.4	2424.96	0.208095	1	1100.56	343.984	792.403	415.359	-0.257522	1	1062.33	2046.47	836.154	748.879	-0.971344	0.0508037	904.342	1085.08	1032.61	1832.13	0.525928	1	410.307	238.53	338.558	219.914	-0.216229	1	935.325	544.985	336.055	351.882	-1.10534	0.0431884
EDS5	Zm00001d015060	1233.06	1119.88	1394.65	1208.17	0.145596	1	1153.24	728.027	916.188	857.577	-0.083976	1	1333.76	1025.63	538.951	507.001	-0.985275	0.0473773	394.105	269.448	379.757	451.83	0.325012	1	445.421	361.11	448.473	395.01	0.0645741	1	394.2	327.19	382.408	320.247	-0.0375365	1
PBS3	Zm00001d022473	35.9104	20.5195	83.7086	18.0029	0.847236	1	13.8031	25.6996	19.0731	22.6863	0.0719304	1	141.379	176.547	29.7689	71.9716	-1.63955	0.0500027	39.75	13.1629	27.6674	13.4767	-0.361134	1	11.0381	23.0118	25.4073	21.3848	0.459897	1	47.8337	41.5149	32.9872	48.4398	-0.134358	0.9599
PAL	Zm00001d051161	429.615	583.3	673.072	404.586	0.0886605	1	500.898	205.526	716.702	1066.74	1.33946	0.529826	409.74	263.296	579.504	607.189	0.816819	0.152356	139.381	317.032	219.596	1040.06	1.46417	1	352.122	250.054	184.404	215.824	-0.589589	1	9.29907	28.5795	175.014	157.157	3.12421	6.62e-05
	Zm00001d017274	3385.31	5433.9	3189.4	5126.96	-0.0847136	1	2114.88	1419.13	2242.51	3381.77	0.670866	1	1998.57	1059.04	3139.33	2037.15	0.759055	0.192282	1414.6	2126.7	1624.76	5428.2	0.993883	1	2742.75	2313.27	2054.47	1602.42	-0.467311	1	239.497	577.975	1421.49	1301.76	1.73587	0.00185349
	Zm00001d017275	2104.3	4326.57	1200.17	4303.48	-0.224602	1	1700.47	3256.75	1956.24	4437.57	0.367025	1	694.526	474.459	5518.92	5683.61	3.25938	1.68e-15	1536.57	4232.73	1782.94	5032.2	0.240341	1	5569.78	5405.22	4504.85	3958.19	-0.374946	1	269.192	1042.05	2711.78	3270.72	2.18956	0.00142654
	Zm00001d003016	994.377	1467.6	586.153	1496.74	-0.241107	1	389.89	330.363	537.173	598.327	0.657948	1	214.067	102.713	45.6188	124.799	-0.893457	0.399717	480.223	818.901	521.266	1387.5	0.554987	1	1295.13	737.282	752.199	758.45	-0.428186	1	38.9886	128.701	21.5323	23.7231	-1.88381	0.0503152
AIM1	Zm00001d053308	2072.51	1468.36	1993.55	1277.64	-0.114265	1	1014.45	2664.08	1713.74	2858.76	0.313463	1	3034.26	2407.02	10988.4	12395.8	2.10335	1.21e-07	2399.37	1685.84	2264.13	1291.45	-0.200268	1	1047.35	3271.06	2437.62	3297.46	0.409371	1	2081.8	2696.4	9318.19	8534.12	1.90154	0.000103314
	Zm00001d015992	430.637	383.427	447.309	381.764	0.0263702	1	317.654	644.915	350.665	468.384	-0.234408	1	525.508	419.906	891.204	852.861	0.882663	0.0662736	409.567	446.418	377.959	351.553	-0.230403	1	366.173	815.605	391.649	576.207	-0.287891	1	276.994	412.252	707.572	805.574	1.13415	0.0296785
SAGT	Zm00001d021167	16.2393	4.36191	31.0303	4.68468	0.786738	1	4.1415	0.649323	36.6857	20.22	3.59907	0.0643157	132.096	36.4738	320.061	373.337	2.03511	0.0072891	7.77186	2.24199	12.0472	3.13803	0.58652	1	18.0562	11.662	148.522	13.2714	2.4346	0.549707	43.531	127.576	701.752	374.602	2.65172	7.35e-05
	Zm00001d021168	110.321	1279.73	107.598	177.124	-2.28655	1	2.33142	78.0607	1.50398	57.0276	-0.457957	1	2.07944	15.3917	363.809	1375.55	6.63654	3.54e-13	41.5555	387.467	30.2631	54.7665	-2.33163	0.795246	32.109	232.166	161.29	1005.79	2.14132	0.594604	1.38594	51.3613	925.372	422.044	4.66321	2.91e-05
	Zm00001d008795	2.19637	2.68812	3.22749	2.84914	0.296401	1	3.48962	14.1766	6.21912	30.4132	1.03095	1	20.4593	7.01821	92.3948	82.6296	2.65225	0.00490482	0.946366	5.36396	4.6282	2.0846	0.0989737	1	5.02167	51.6805	97.3051	92.6457	1.73938	1	5.68726	4.64272	257.269	59.2818	4.90784	1.44e-06
	Zm00001d004366	20.5452	2.54147	16.0802	8.53332	0.0915446	1	6.54385	22.7265	15.8018	91.216	1.85644	1	40.9334	11.1366	442.456	168.177	3.53873	3.61e-05	4.84104	4.35872	4.57226	6.1981	0.220201	1	3.01487	37.8094	127.645	198.508	2.99075	0.0599428	6.8858	9.18426	240.228	71.1453	4.25794	3.1e-06
	Zm00001d037708	3.21118	0	7.46419	1.86664	1.51874	1	ns	ns	ns	ns	ns	ns	1.04494	7.61734	24.1324	104.45	3.86083	0.00358835	6.81527	0.0514786	1.86619	0.00721655	-1.73193	1	ns	ns	ns	ns	ns	ns	13.4185	0.132992	28.8907	7.89066	1.40444	0.513793
	Zm00001d008764	899.618	2954.99	303.4	1949.03	-0.775006	1	2239.08	3123.51	2209.05	1901.45	-0.383913	1	654.558	313.924	138.095	152.015	-1.73886	0.00327106	1962.6	6225.88	1729.67	2825.77	-0.845961	1	4445.19	5725.68	3811.71	6038.05	-0.046297	1	256.674	1156.05	44.2436	186.842	-2.61162	0.00408265
BSMT	Zm00001d015224	0.0097441	0.906978	1.11276	3.82892	2.1011	1	3.38298	10.2335	5.85917	2.78432	-0.679566	1	13.3131	10.7357	3.68304	8.80466	-0.926094	0.581005	20.3963	2.29991	19.309	18.6159	0.732052	1	10.0328	11.5614	3.33195	5.0867	-1.33601	1	3.33464	0.0492213	20.0619	17.7888	3.37367	0.0153402
	Zm00001d015217	9.68793	0.793513	4.23892	0	-1.27683	1	1.36016	0	2.35611	1.39385	1.57011	1	54.2782	36.1066	2.77206	4.78081	-3.52961	0.000942696	46.5765	1.24246	92.8923	81.6938	1.86276	1	6.01766	2.40453	1.69992	1.02195	-1.53654	1	6.75022	2.40436	12.6109	2.95248	0.753002	0.748417
GH3.5	Zm00001d008957	904.989	1458.66	477.56	1412.97	-0.322089	1	1990.74	658.19	1533.95	884.39	-0.130952	1	1714.83	1202.34	405.005	396.101	-1.8645	8.58e-06	958.556	1337.05	1204.57	2166.1	0.554097	1	2298.33	943.327	1951.49	585.411	-0.353582	1	607.569	1826.51	150.925	212.52	-2.74333	5.75e-06
SOT	Zm00001d033514	2.23001	5.42192	8.54398	2.81907	0.545733	1	2.88257	1.47936	11.9086	12.4087	2.46491	1	8.17844	2.89983	1.39e-17	1.39e-17	-5.52935	2.57431e-06	0	2.13652	0.883976	3.0889	0.847545	1	1.00536	5.6663	0.744642	5.07643	-0.195941	1	ns	ns	ns	ns	ns	ns
	Zm00001d033516	1.09434	0.882931	4.2748	1.88253	1.52287	1	5.39066	0	5.99096	7.32839	1.39968	1	3.07856	3.96338	1.39e-17	1.39e-17	-4.88237	3.00069e-05	ns	ns	ns	ns	ns	ns	ns	ns	ns	ns	ns	ns	ns	ns	ns	ns	ns	ns
S5H	Zm00001d029744	373.984	424.686	176.387	223.754	-0.996437	1	117.321	81.1039	873.493	1047.64	3.28132	1.48e-09	430.23	284.532	21783.6	18025.7	5.79762	2.07e-36	246.881	359.47	249.171	303.972	-0.132265	1	165.533	409.41	3247.57	2184.75	3.24034	1.46e-06	565.23	720.992	12355.4	9809.19	4.10684	1.58e-16
	Zm00001d027423	9.70709	1.69122	8.56947	4.73417	0.223077	1	6.88386	0.594596	27.4979	48.4252	3.38065	0.0897103	45.0471	21.622	851.978	1038.03	4.80778	1.7e-19	6.71345	54.0721	36.6247	135.37	1.49587	1	5.01779	9.18644	115.236	58.0487	3.59262	0.00109218	4.44738	0.0622986	788.175	344.945	7.87664	5.54e-21
S3H	Zm00001d002564	413.173	326.962	576.222	195.095	0.0592037	1	0.146696	3.1987	53.7042	115.747	5.39385	5.4e-06	235.527	18.0332	409.61	650.682	2.06178	0.0548513	60.032	57.5823	126.88	141.648	1.18914	1	1.00859	70.0954	109.851	191.378	2.07555	1	8.25707	68.6927	450.507	210.52	3.09677	0.00133437
UGT	Zm00001d019250	32.8079	67.3066	26.9686	58.1304	-0.233976	1	71.3211	57.9478	89.0233	61.9163	0.223524	1	49.1721	47.8609	100.667	297.316	2.03408	0.0136049	51.2981	69.4745	62.5602	49.6469	-0.1049	1	149.476	110.024	126.22	68.2278	-0.415096	1	33.2868	109.126	167.825	273.806	1.63059	0.0502691
	Zm00001d019256	216.978	231.153	121.604	258.073	-0.238399	1	17.6777	12.2704	25.2195	69.7968	1.66757	1	60.4914	276.758	1912.09	2277.6	3.63659	2.69e-08	269.208	160.848	328.314	282.284	0.504991	1	39.1303	142.029	81.0588	159.815	0.410827	1	279.179	289.115	1695.33	1045.75	2.26987	1.24e-06
	Zm00001d005174	694.501	714.052	693.6	842.599	0.125224	1	976.37	86.1652	571.183	157.298	-0.544557	1	417.984	770.024	162.441	94.2832	-2.20966	0.000105927	236.222	393.118	312.525	786.78	0.80444	1	804.559	109.109	492.011	80.4632	-0.674455	1	328.139	298.368	60.1201	58.3159	-2.40029	3.13e-05
	Zm00001d048707	1599.44	1954.95	914.111	2107.96	-0.233932	1	1686.58	1752.84	1681.37	1198.6	-0.256416	1	1767.07	1093.5	716.717	588.187	-1.13276	0.0162022	850.096	1530.35	1029.94	1003.98	-0.226743	1	1750.59	1531	1539.16	1277.66	-0.220266	1	417.317	1598.39	292.045	359.793	-1.62848	0.0207126
	4445.19	5725.68	3811.71	6038.05	-0.046297	1	7.81154	0.919341	1
