# Supplementary material for: Multi-Omics Analyses Reveal the Regulatory Network and the Function of ZmUGTs in Maize Defense Response
Source: Front Plant Sci. 2021 Sep 24;12:738261. doi: 10.3389/fpls.2021.738261 (PMC8497902; doi:10.3389/fpls.2021.738261)
Supplement: Supplementary file 8 [file Table_7.XLSX]

## Sheet: UGT expression
Supplementary Table S7 The gene structure and the transcript levels of ZmUGTs in the Rp1-D21 mutant compared to the corresponding wild type.
						B73×H95-6hpts		B73×H95-48hpts		B73×H95-22 ℃		Mo17×H95-6hpts		Mo17×H95-48hpts		Mo17×H95-22 ℃
Gene-id	Chromosome	Gene start (bp)	Gene end (bp)	Transcript length (bp, including UTRs and CDS)	Transcript count	Fold-Change(FC)	FDR	FC	FDR	FC	FDR	FC	FDR	FC	FDR	FC	FDR
Zm00001d019250	7	23983369	23984976	1428	2	0.929869	1	0.749969	1	3.09639	0.0532691	0.850288	1	1.16758	1	4.09562	0.0136049
Zm00001d019256	7	24211071	24212860	1689	1	1.41911	1	1.32945	1	4.82279	1.24e-06	0.847685	1	3.17679	1	12.4372	2.69e-08
Zm00001d005174	2	162398074	162402945	1890	1	1.74647	1	0.626569	1	0.189427	3.13e-05	1.09068	1	0.685602	1	0.216185	0.000105927
Zm00001d048707	4	3787419	3789065	1529	3	0.854562	1	0.858407	1	0.323429	0.0207126	0.850314	1	0.837165	1	0.456041	0.0162022
Zm00001d031209	1	182293107	182294953	1753	2	1.51561	1	1.04062	1	1.38201	0.539993	0.858848	1	1.04454	1	1.79087	0.0769741
Zm00001d005456	2	174866938	174869050	1994	1	0.840899	1	0.33202	1	1	1	0.321278	1	3.89884	1	1	1
Zm00001d019258	7	24336969	24338520	1431	1	1	1	1	1	4.44477	0.46144	1	1	1	1	48.6583	0.050808
Zm00001d019259	7	24363166	24364886	1634	1	1	1	1	1	1	1	30.2444	1	1	1	0.167818	0.539816
Zm00001d019265	7	24771102	24772823	1618	2	1	1	1	1	1	1	1	1	1	1	1	1
Zm00001d004366	2	106628660	106630400	1436	4	1.1649	1	7.94889	0.0599428	19.1324	3.1e-06	1.06551	1	3.62113	1	11.6215	3.61e-05
Zm00001d006137	2	199596576	199601928	1669	1	0.44067	1	0.429638	1	0.294709	0.176498	0.405925	1	1.09409	1	0.457058	0.312563
Zm00001d006145	2	199712742	199713458	717	1	0.760092	1	0.569241	1	0.671213	0.805459	1.1035	1	0.38612	1	1.66804	0.63087
Zm00001d008764	8	19520818	19522320	1503	1	0.55634	1	0.968419	1	0.163616	0.00408265	0.584386	1	0.766356	1	0.299607	0.00327106
Zm00001d008795	8	20660019	20662322	1850	2	1.07101	1	3.33892	1	30.0198	1.44e-06	1.22808	1	2.04337	1	6.28646	0.00490482
Zm00001d021167	7	144659589	144661331	1671	1	1.50162	1	5.40615	0.549707	6.28414	7.35e-05	1.72517	1	12.1179	0.0643157	4.09855	0.0072891
Zm00001d021168	7	144743120	144744903	1668	1	0.198659	0.795246	4.41167	0.594604	25.3376	2.91e-05	0.204965	1	0.728016	1	99.4944	3.54e-13
Zm00001d025036	10	100773356	100775278	1525	5	1.71779	1	0.953019	1	0.930064	1	1.45682	1	1.43838	1	0.751417	0.829664
Zm00001d025037	10	100955562	100957474	1679	4	0.888719	1	0.671001	1	1.99108	0.564179	1.33697	1	1.32914	1	1.47659	0.793183
Zm00001d029620	1	79984693	79986558	1708	1	1.08571	1	0.831899	1	0.87267	0.887654	0.626935	1	0.974883	1	1.34362	0.610786
Zm00001d037708	6	134609481	134610956	1269	1	0.301049	1	ns	ns	2.64716	0.513793	2.8654	1	ns	ns	14.5287	0.00358835
Zm00001d046466	9	91186418	91187800	1383	1	ns	ns	ns	ns	ns	ns	ns	ns	ns	ns	55.6249	0.0303077
Zm00001d052480	4	190894833	190896279	1350	1	1.36166	1	1.12403	1	7.97813	0.0343591	0.88886	1	1.32824	1	2.36704	0.327306
Note: ns presents no expression data.
