# Supplementary material for: Multi-Omics Analyses Reveal the Regulatory Network and the Function of ZmUGTs in Maize Defense Response
Source: Front Plant Sci. 2021 Sep 24;12:738261. doi: 10.3389/fpls.2021.738261 (PMC8497902; doi:10.3389/fpls.2021.738261)
Supplement: Supplementary file 9 [file Table_8.XLSX]

## Sheet: Sheet1
Supplementary Table S8 The primers used in this study.
Primer name	GeneID	Primer sequence (5`-3`)
ZmUGT9250-F1	Zm00001d019250	ATGGGTTCTATAGGAGGACAC
ZmUGT9250-R1		CAGTGTCAGAATGTGGTCTAC
ZmUGT9256-F1	Zm00001d019256	CTAACGACGACGATGGCC
ZmUGT9256-R1		AAGAGAAAGTATGTGATCCACCAAC
ZmUGT5174-F1	Zm00001d005174	TCGAGCAGCGCCATGG
ZmUGT5174-R1		AAATGACGCTATGCGATCTATC
ZmUGT8707-F1	Zm00001d048707	ATGGCAGCATCGTGCG
ZmUGT8707-R1		GTAGGAGTTTATGAGATGAACC
ZmFNSI-1-F1	Zm00001d029744	ATGGCGGAGCACCTCCTG
ZmFNSI-1-R1		GGTTCTGAAGAGCTCGAGGC
ZmFNSI-2-F1	Zm00001d027423	ATGGCAGAGCATCTCATCTC
ZmFNSI-2-R1		GGAGGTCGGGGTCCTGAAG
Rp1-D21-F1	Rp1-D21	CAACACATTTATGTCTTTTATGTACAG
Rp1-D21-R1		GTCATCAACCGAATCAGAGATAC
ZmPR1-F1	ZmPR1	AACAATGGCACCGAGGCTAGCGT
ZmPR1-R1		TGGTGTCGTGGTCGTAGTACT
ZmPR5-F1	ZmPR5	AACAACTGCGGTTCACCGTG
ZmPR5-R1		ACCGAGATGTCGTAGAAGTCC
EF1a-F1	ZmEF1a	GAACAAGCGGTCATTCAAG
EF1a-R1		CAAAACCAGAGATTGGAACG
